# Supplementary material for: Supplementing High-Density SNP Microarrays for Additional Coverage of Disease-Related Genes: Addiction as a Paradigm
Source: PLoS One. 2009 Apr 21;4(4):e5225. doi: 10.1371/journal.pone.0005225 (PMC2668711; doi:10.1371/journal.pone.0005225)
Supplement: File S2 — This workbook contains two sheets: (1) an annotated sheet with the top 5,000 SNPs ranked by prioritization score (2) a list of column descriptions (3.76 MB XLS) [file pone.0005225.s002.xls]

## Sheet: SNPs
rs ID (Linked to dbSNP)	Chr	Pos (bp)	HM CEU MAF	HM CHB MAF	HM JPT MAF	HM YRI MAF	Gene Symbol (Linked to NCBI)	Gene Name	Function	Human /Mouse Cons.	Category	Mouse QTL Top Gene	Mouse QTL Count	Prioritization Score	NeuroSNP Submitted	SNP is on Goldman Chip	Affy 5.0	Affy 6.0	Illum 300 Duo	Illum 550	Illum 610 Quad	Illum 650Y	Illum 1M	Tag-8 / Affy 5.0 / CEU	Tag-8 / Affy 5.0 / CHB	Tag-8 / Affy 5.0 / JPT	Tag-8 / Affy 5.0 / YRI	Tag-8 / Affy 6.0 / CEU	Tag-8 / Affy 6.0 / CHB	Tag-8 / Affy 6.0 / JPT	Tag-8 / Affy 6.0 / YRI	Tag-8 / Illum 300 Duo / CEU	Tag-8 / Illum 300 Duo / CHB	Tag-8 / Illum 300 Duo / JPT	Tag-8 / Illum 300 Duo / YRI	Tag-8 / Illum 550 / CEU	Tag-8 / Illum 550 / CHB	Tag-8 / Illum 550 / JPT	Tag-8 / Illum 550 / YRI	Tag-8 / Illum 610 Quad / CEU	Tag-8 / Illum 610 Quad / CHB	Tag-8 / Illum 610 Quad / JPT	Tag-8 / Illum 610 Quad / YRI	Tag-8 / Illum 650Y / CEU	Tag-8 / Illum 650Y / CHB	Tag-8 / Illum 650Y / JPT	Tag-8 / Illum 650Y / YRI	Tag-8 / Illum 1M / CEU	Tag-8 / Illum 1M / CHB
9989	1	59020441	.	.	.	.	JUN	jun oncogene	Nonsynon	0.87	Goldman Gene	1	7	4.38	0	0	0	0	0	0	0	0	0	0	0	0	0	0	0	0	0	0	0	0	0	0	0	0	0	0	0	0	0	0	0	0	0	0	0
1050156	10	88844437	.	.	.	.	GLUD1	glutamate dehydrogenase 1	Nonsynon	0.84	The Glutamatergic System	1	6	4.35	0	0	0	0	0	0	0	0	0	0	0	0	0	0	0	0	0	0	0	0	0	0	0	0	0	0	0	0	0	0	0	0	0	0	0
1050159	10	88844340	.	.	.	.	GLUD1	glutamate dehydrogenase 1	Nonsynon	0.84	The Glutamatergic System	1	6	4.35	0	0	0	0	0	0	0	0	0	0	0	0	0	0	0	0	0	0	0	0	0	0	0	0	0	0	0	0	0	0	0	0	0	0	0
1050160	10	88844232	0	0	0	0	GLUD1	glutamate dehydrogenase 1	Nonsynon	0.84	The Glutamatergic System	1	6	4.35	0	0	0	0	0	0	0	0	0	0	0	0	0	0	0	0	0	0	0	0	0	0	0	0	0	0	0	0	0	0	0	0	0	0	0
3967767	4	164490987	0	0	0	0	NPY5R	neuropeptide Y receptor Y5	Nonsynon	0.84	Goldman Gene	1	6	4.35	0	0	0	0	0	0	0	0	0	0	0	0	0	0	0	0	0	0	0	0	0	0	0	0	0	0	0	0	0	0	0	0	0	0	0
13306476	17	42719574	0	0	0	0	ITGB3	integrin, beta 3 (platelet glycoprotein IIIa, antigen CD61)	Nonsynon	0.84	Special	1	6	4.35	0	0	0	0	0	0	0	0	0	0	0	0	0	0	0	0	0	0	0	0	0	0	0	0	0	0	0	0	0	0	0	0	0	0	0
34060574	3	124649139	.	.	.	.	ADCY5	adenylate cyclase 5	Nonsynon	0.84	Special	1	7	4.35	0	0	0	0	0	0	0	0	0	0	0	0	0	0	0	0	0	0	0	0	0	0	0	0	0	0	0	0	0	0	0	0	0	0	0
11544173	5	71050958	.	.	.	.	CART	CART prepropeptide	Nonsynon	0.83	Goldman Gene	1	7	4.34	0	0	0	0	0	0	0	0	0	0	0	0	0	0	0	0	0	0	0	0	0	0	0	0	0	0	0	0	0	0	0	0	0	0	0
34826744	5	147843011	.	.	.	.	HTR4	5-hydroxytryptamine (serotonin) receptor 4	Nonsynon	0.82	The Serotonergic System	1	6	4.34	0	0	0	0	0	0	0	0	0	0	0	0	0	0	0	0	0	0	0	0	0	0	0	0	0	0	0	0	0	0	0	0	0	0	0
2289593	8	26537614	0	0.067	0.057	0	DPYSL2	dihydropyrimidinase-like 2	Nonsynon	0.81	Special	1	10	4.33	0	0	0	1	0	0	0	0	0	0	0	0	0	1	1	1	1	0	0	0	0	0	0	0	0	0	0	0	0	0	0	0	0	0	0
36092317	3	124650050	.	.	.	.	ADCY5	adenylate cyclase 5	Nonsynon	0.81	Special	1	7	4.33	0	0	0	0	0	0	0	0	0	0	0	0	0	0	0	0	0	0	0	0	0	0	0	0	0	0	0	0	0	0	0	0	0	0	0
35448696	11	69957451	.	.	.	.	CTTN	cortactin	Nonsynon	0.8	Special	1	6	4.32	0	0	0	0	0	0	0	0	0	0	0	0	0	0	0	0	0	0	0	0	0	0	0	0	0	0	0	0	0	0	0	0	0	0	0
12517689	5	71052184	0.009	0	0	0	CART	CART prepropeptide	Nonsynon	0.79	Goldman Gene	1	7	4.31	0	0	0	0	0	0	0	0	1	0	0	0	0	0	0	0	0	0	0	0	0	0	0	0	0	0	0	0	0	0	0	0	0	1	1
34981086	5	71052158	.	.	.	.	CART	CART prepropeptide	Nonsynon	0.79	Goldman Gene	1	7	4.31	0	0	0	0	0	0	0	0	0	0	0	0	0	0	0	0	0	0	0	0	0	0	0	0	0	0	0	0	0	0	0	0	0	0	0
35228439	5	147810964	.	.	.	.	HTR4	5-hydroxytryptamine (serotonin) receptor 4	Nonsynon	0.79	The Serotonergic System	1	6	4.31	0	0	0	0	0	0	0	0	0	0	0	0	0	0	0	0	0	0	0	0	0	0	0	0	0	0	0	0	0	0	0	0	0	0	0
5917	17	42716952	0	0	0.023	0	ITGB3	integrin, beta 3 (platelet glycoprotein IIIa, antigen CD61)	Nonsynon	0.78	Special	1	6	4.3	0	0	0	1	0	0	0	0	1	0	0	0	0	1	1	1	1	0	0	0	0	0	0	0	0	0	0	0	0	0	0	0	0	1	1
1176744	11	113308238	0.25	0.17	0.3	0.433	HTR3B	5-hydroxytryptamine (serotonin) receptor 3B	Nonsynon	0.78	The Serotonergic System	1	7	4.3	0	1	0	0	1	1	1	1	1	1	1	1	0	1	1	1	0	1	1	1	1	1	1	1	1	1	1	1	1	1	1	1	1	1	1
34092813	17	42731835	.	.	.	.	ITGB3	integrin, beta 3 (platelet glycoprotein IIIa, antigen CD61)	Nonsynon	0.78	Special	1	6	4.3	0	0	0	0	0	0	0	0	0	0	0	0	0	0	0	0	0	0	0	0	0	0	0	0	0	0	0	0	0	0	0	0	0	0	0
34550504	11	113308280	.	.	.	.	HTR3B	5-hydroxytryptamine (serotonin) receptor 3B	Nonsynon	0.78	The Serotonergic System	1	7	4.3	0	0	0	0	0	0	0	0	0	0	0	0	0	0	0	0	0	0	0	0	0	0	0	0	0	0	0	0	0	0	0	0	0	0	0
5918	17	42715729	0.148	0.034	0.011	0.164	ITGB3	integrin, beta 3 (platelet glycoprotein IIIa, antigen CD61)	Nonsynon	0.77	Special	1	6	4.3	0	0	0	0	0	0	0	0	1	1	0	0	1	1	0	0	1	0	0	0	1	1	0	0	1	1	0	0	1	1	0	0	1	1	1
5921	17	42724600	0.017	0	0	0	ITGB3	integrin, beta 3 (platelet glycoprotein IIIa, antigen CD61)	Nonsynon	0.77	Special	1	6	4.3	0	0	0	0	0	0	0	0	1	0	0	0	0	0	0	0	0	0	0	0	0	0	0	0	0	0	0	0	0	0	0	0	0	1	1
5013003	5	78733623	0	0	0	0	HOMER1	homer homolog 1 (Drosophila)	Nonsynon	0.77	Special	1	6	4.3	0	0	0	0	0	0	0	0	0	0	0	0	0	0	0	0	0	0	0	0	0	0	0	0	0	0	0	0	0	0	0	0	0	0	0
13306487	17	42724787	.	.	.	.	ITGB3	integrin, beta 3 (platelet glycoprotein IIIa, antigen CD61)	Nonsynon	0.77	Special	1	6	4.3	0	0	0	0	0	0	0	0	0	0	0	0	0	0	0	0	0	0	0	0	0	0	0	0	0	0	0	0	0	0	0	0	0	0	0
36080296	17	42715750	.	.	.	.	ITGB3	integrin, beta 3 (platelet glycoprotein IIIa, antigen CD61)	Nonsynon	0.77	Special	1	6	4.3	0	0	0	0	0	0	0	0	0	0	0	0	0	0	0	0	0	0	0	0	0	0	0	0	0	0	0	0	0	0	0	0	0	0	0
41291947	5	147909905	.	.	.	.	HTR4	5-hydroxytryptamine (serotonin) receptor 4	Nonsynon	0.77	The Serotonergic System	1	6	4.3	0	0	0	0	0	0	0	0	0	0	0	0	0	0	0	0	0	0	0	0	0	0	0	0	0	0	0	0	0	0	0	0	0	0	0
17116138	11	113308876	0.025	0	0	0.075	HTR3B	5-hydroxytryptamine (serotonin) receptor 3B	Nonsynon	0.75	The Serotonergic System	1	7	4.28	0	1	1	1	0	0	0	0	1	1	1	1	1	1	1	1	1	0	0	0	0	0	0	0	0	0	0	0	0	0	0	0	1	1	1
11541171	14	89940052	.	.	.	.	CALM1	calmodulin 1 (phosphorylase kinase, delta)	Nonsynon	0.74	Special	1	11	4.27	0	0	0	0	0	0	0	0	0	0	0	0	0	0	0	0	0	0	0	0	0	0	0	0	0	0	0	0	0	0	0	0	0	0	0
34160418	11	113280886	.	.	.	.	HTR3B	5-hydroxytryptamine (serotonin) receptor 3B	Nonsynon	0.73	The Serotonergic System	1	7	4.27	0	0	0	0	0	0	0	0	0	0	0	0	0	0	0	0	0	0	0	0	0	0	0	0	0	0	0	0	0	0	0	0	0	0	0
35549484	22	20473016	.	.	.	.	MAPK1	mitogen-activated protein kinase 1	Nonsynon	0.73	Special	1	23	4.27	0	0	0	0	0	0	0	0	0	0	0	0	0	0	0	0	0	0	0	0	0	0	0	0	0	0	0	0	0	0	0	0	0	0	0
35712170	17	42735100	.	.	.	.	ITGB3	integrin, beta 3 (platelet glycoprotein IIIa, antigen CD61)	Nonsynon	0.73	Special	1	6	4.27	0	0	0	0	0	0	0	0	0	0	0	0	0	0	0	0	0	0	0	0	0	0	0	0	0	0	0	0	0	0	0	0	0	0	0
1051430	17	42686261	.	.	.	.	ITGB3	integrin, beta 3 (platelet glycoprotein IIIa, antigen CD61)	Nonsynon	0.72	Special	1	6	4.26	0	0	0	0	0	0	0	0	0	0	0	0	0	0	0	0	0	0	0	0	0	0	0	0	0	0	0	0	0	0	0	0	0	0	0
5578	4	164465939	0.008	0	0	0	NPY1R	neuropeptide Y receptor Y1	Nonsynon	0.82	Goldman Gene	0	5	4.17	0	1	0	0	0	0	0	0	1	0	0	0	0	0	0	0	0	0	0	0	0	0	0	0	0	0	0	0	0	0	0	0	0	1	1
2235804	23	101798774	0.022	0.147	0.182	0.233	GPRASP1	G protein-coupled receptor associated sorting protein 1	Nonsynon	0.95	Special	0	4	4.12	0	0	0	0	0	0	0	0	1	0	0	1	0	0	0	1	0	0	0	0	0	0	0	1	0	0	0	1	0	0	0	1	0	1	1
17292748	23	101797832	.	.	.	.	GPRASP1	G protein-coupled receptor associated sorting protein 1	Nonsynon	0.95	Special	0	4	4.12	0	0	0	0	0	0	0	0	0	0	0	0	0	0	0	0	0	0	0	0	0	0	0	0	0	0	0	0	0	0	0	0	0	0	0
17339512	23	101796441	.	.	.	.	GPRASP1	G protein-coupled receptor associated sorting protein 1	Nonsynon	0.95	Special	0	4	4.12	0	0	0	0	0	0	0	0	0	0	0	0	0	0	0	0	0	0	0	0	0	0	0	0	0	0	0	0	0	0	0	0	0	0	0
34669836	23	101796326	.	.	.	.	GPRASP1	G protein-coupled receptor associated sorting protein 1	Nonsynon	0.95	Special	0	4	4.12	0	0	0	0	0	0	0	0	0	0	0	0	0	0	0	0	0	0	0	0	0	0	0	0	0	0	0	0	0	0	0	0	0	0	0
34771325	23	101796889	.	.	.	.	GPRASP1	G protein-coupled receptor associated sorting protein 1	Nonsynon	0.95	Special	0	4	4.12	0	0	0	0	0	0	0	0	0	0	0	0	0	0	0	0	0	0	0	0	0	0	0	0	0	0	0	0	0	0	0	0	0	0	0
35873543	23	101796904	.	.	.	.	GPRASP1	G protein-coupled receptor associated sorting protein 1	Nonsynon	0.95	Special	0	4	4.12	0	0	0	0	0	0	0	0	0	0	0	0	0	0	0	0	0	0	0	0	0	0	0	0	0	0	0	0	0	0	0	0	0	0	0
2020863	1	169441155	0.075	0.289	0.25	0.008	FMO2	flavin containing monooxygenase 2 (non-functional)	Nonsynon	0.92	The Nicotine Metabolism System	0	4	4.09	0	0	0	0	1	1	1	1	1	1	1	1	0	1	1	1	0	1	1	1	1	1	1	1	1	1	1	1	1	1	1	1	1	1	1
28369899	1	169441386	.	.	.	.	FMO2	flavin containing monooxygenase 2 (non-functional)	Nonsynon	0.92	The Nicotine Metabolism System	0	4	4.09	0	0	0	0	0	0	0	0	0	0	0	0	0	0	0	0	0	0	0	0	0	0	0	0	0	0	0	0	0	0	0	0	0	0	0
2020860	1	169429207	0.033	0	0	0.283	FMO2	flavin containing monooxygenase 2 (non-functional)	Nonsynon	0.89	The Nicotine Metabolism System	0	4	4.06	0	0	0	1	0	0	1	0	1	0	0	0	1	1	1	1	1	0	0	0	0	0	0	0	0	1	1	1	1	0	0	0	0	1	1
2020862	1	169435208	0.242	0.433	0.477	0.467	FMO2	flavin containing monooxygenase 2 (non-functional)	Nonsynon	0.89	The Nicotine Metabolism System	0	4	4.06	0	0	0	0	1	1	1	1	1	1	1	1	1	1	1	1	1	1	1	1	1	1	1	1	1	1	1	1	1	1	1	1	1	1	1
2307492	1	169435169	0.15	0.067	0.011	0.178	FMO2	flavin containing monooxygenase 2 (non-functional)	Nonsynon	0.89	The Nicotine Metabolism System	0	4	4.06	0	0	1	1	1	1	1	1	1	1	1	1	1	1	1	1	1	1	1	1	1	1	1	1	1	1	1	1	1	1	1	1	1	1	1
28745274	1	169429171	.	.	.	.	FMO2	flavin containing monooxygenase 2 (non-functional)	Nonsynon	0.89	The Nicotine Metabolism System	0	4	4.06	0	0	0	0	0	0	0	0	0	0	0	0	0	0	0	0	0	0	0	0	0	0	0	0	0	0	0	0	0	0	0	0	0	0	0
2020866	1	169439745	0	0	0	0.025	FMO2	flavin containing monooxygenase 2 (non-functional)	Nonsynon	0.88	The Nicotine Metabolism System	0	4	4.05	0	0	0	1	0	0	1	0	1	0	0	0	0	1	1	1	1	0	0	0	0	0	0	0	0	1	1	1	1	0	0	0	0	1	1
28369860	1	169432427	.	.	.	.	FMO2	flavin containing monooxygenase 2 (non-functional)	Nonsynon	0.88	The Nicotine Metabolism System	0	4	4.05	0	0	0	0	0	0	0	0	0	0	0	0	0	0	0	0	0	0	0	0	0	0	0	0	0	0	0	0	0	0	0	0	0	0	0
28369895	1	169439713	.	.	.	.	FMO2	flavin containing monooxygenase 2 (non-functional)	Nonsynon	0.88	The Nicotine Metabolism System	0	4	4.05	0	0	0	0	0	0	0	0	0	0	0	0	0	0	0	0	0	0	0	0	0	0	0	0	0	0	0	0	0	0	0	0	0	0	0
6661174	1	169444714	0	0	0	0.175	FMO2	flavin containing monooxygenase 2 (non-functional)	Nonsynon	0.86	The Nicotine Metabolism System	0	4	4.04	0	0	0	0	0	1	1	1	1	0	0	0	1	0	0	0	1	0	0	0	0	1	1	1	1	1	1	1	1	1	1	1	1	1	1
13338460	16	3760683	.	.	.	.	CREBBP	CREB binding protein (Rubinstein-Taybi syndrome)	Nonsynon	0.84	Special	0	4	4.02	0	0	0	0	0	0	0	0	0	0	0	0	0	0	0	0	0	0	0	0	0	0	0	0	0	0	0	0	0	0	0	0	0	0	0
35835345	16	3760742	.	.	.	.	CREBBP	CREB binding protein (Rubinstein-Taybi syndrome)	Nonsynon	0.84	Special	0	4	4.02	0	0	0	0	0	0	0	0	0	0	0	0	0	0	0	0	0	0	0	0	0	0	0	0	0	0	0	0	0	0	0	0	0	0	0
35779259	16	3772843	.	.	.	.	CREBBP	CREB binding protein (Rubinstein-Taybi syndrome)	Nonsynon	0.83	Special	0	4	4.01	0	0	0	0	0	0	0	0	0	0	0	0	0	0	0	0	0	0	0	0	0	0	0	0	0	0	0	0	0	0	0	0	0	0	0
1064562	17	55092676	0	0	0	0	CLTC	clathrin, heavy chain (Hc)	Nonsynon	0.82	Special	0	4	4	0	0	0	0	0	0	0	0	0	0	0	0	0	0	0	0	0	0	0	0	0	0	0	0	0	0	0	0	0	0	0	0	0	0	0
6861622	5	149649354	0	0	0	0	CAMK2A	calcium/calmodulin-dependent protein kinase (CaM kinase) II alpha	Nonsynon	0.82	Special	0	4	4	0	0	0	0	0	0	0	0	0	0	0	0	0	0	0	0	0	0	0	0	0	0	0	0	0	0	0	0	0	0	0	0	0	0	0
28937315	16	3747896	.	.	.	.	CREBBP	CREB binding protein (Rubinstein-Taybi syndrome)	Nonsynon	0.81	Special	0	4	3.99	0	0	0	0	0	0	0	0	0	0	0	0	0	0	0	0	0	0	0	0	0	0	0	0	0	0	0	0	0	0	0	0	0	0	0
41307846	1	1949559	.	.	.	.	GABRD	gamma-aminobutyric acid (GABA) A receptor, delta	Nonsynon	0.81	The GABA System	0	4	3.99	0	0	0	0	0	0	0	0	0	0	0	0	0	0	0	0	0	0	0	0	0	0	0	0	0	0	0	0	0	0	0	0	0	0	0
1059240	19	18901312	.	.	.	.	HOMER3	homer homolog 3 (Drosophila)	Nonsynon	0.8	Special	0	4	3.99	0	0	0	0	0	0	0	0	0	0	0	0	0	0	0	0	0	0	0	0	0	0	0	0	0	0	0	0	0	0	0	0	0	0	0
2272859	22	24429541	0	0	0.023	0	ADRBK2	adrenergic, beta, receptor kinase 2	Nonsynon	0.8	The Adrenergic System	0	4	3.99	0	0	0	0	0	0	0	0	0	0	0	0	0	0	0	0	0	0	0	0	0	0	0	0	0	0	0	0	0	0	0	0	0	0	0
34931018	17	15818834	.	.	.	.	ADORA2B	adenosine A2b receptor	Nonsynon	0.8	Special	0	4	3.99	0	0	0	0	0	0	0	0	0	0	0	0	0	0	0	0	0	0	0	0	0	0	0	0	0	0	0	0	0	0	0	0	0	0	0
2292341	17	55116030	0	0	0	0	CLTC	clathrin, heavy chain (Hc)	Nonsynon	0.79	Special	0	4	3.98	0	0	0	0	0	0	0	0	1	0	0	0	0	0	0	0	0	0	0	0	0	0	0	0	0	0	0	0	0	0	0	0	0	1	1
3211273	8	145138429	.	.	.	.	GRINA	glutamate receptor, ionotropic, N-methyl D-asparate-associated protein 1 (glutamate binding)	Nonsynon	0.78	The Glutamatergic System	0	4	3.97	0	0	0	0	0	0	0	0	0	0	0	0	0	0	0	0	0	0	0	0	0	0	0	0	0	0	0	0	0	0	0	0	0	0	0
3211274	8	145138115	.	.	.	.	GRINA	glutamate receptor, ionotropic, N-methyl D-asparate-associated protein 1 (glutamate binding)	Nonsynon	0.78	The Glutamatergic System	0	4	3.97	0	0	0	0	0	0	0	0	0	0	0	0	0	0	0	0	0	0	0	0	0	0	0	0	0	0	0	0	0	0	0	0	0	0	0
11548883	8	145138503	.	.	.	.	GRINA	glutamate receptor, ionotropic, N-methyl D-asparate-associated protein 1 (glutamate binding)	Nonsynon	0.78	The Glutamatergic System	0	4	3.97	0	0	0	0	0	0	0	0	0	0	0	0	0	0	0	0	0	0	0	0	0	0	0	0	0	0	0	0	0	0	0	0	0	0	0
17854152	8	145137699	.	.	.	.	GRINA	glutamate receptor, ionotropic, N-methyl D-asparate-associated protein 1 (glutamate binding)	Nonsynon	0.78	The Glutamatergic System	0	4	3.97	0	0	0	0	0	0	0	0	0	0	0	0	0	0	0	0	0	0	0	0	0	0	0	0	0	0	0	0	0	0	0	0	0	0	0
35844412	8	145138708	.	.	.	.	GRINA	glutamate receptor, ionotropic, N-methyl D-asparate-associated protein 1 (glutamate binding)	Nonsynon	0.78	The Glutamatergic System	0	4	3.97	0	0	0	0	0	0	0	0	0	0	0	0	0	0	0	0	0	0	0	0	0	0	0	0	0	0	0	0	0	0	0	0	0	0	0
35202756	17	55083440	.	.	.	.	CLTC	clathrin, heavy chain (Hc)	Nonsynon	0.77	Special	0	4	3.96	0	0	0	0	0	0	0	0	0	0	0	0	0	0	0	0	0	0	0	0	0	0	0	0	0	0	0	0	0	0	0	0	0	0	0
35495165	5	149610046	.	.	.	.	CAMK2A	calcium/calmodulin-dependent protein kinase (CaM kinase) II alpha	Nonsynon	0.76	Special	0	4	3.96	0	0	0	0	0	0	0	0	0	0	0	0	0	0	0	0	0	0	0	0	0	0	0	0	0	0	0	0	0	0	0	0	0	0	0
130015	16	3729620	0	0	0	0	CREBBP	CREB binding protein (Rubinstein-Taybi syndrome)	Nonsynon	0.75	Special	0	4	3.95	1	0	0	0	0	0	0	0	1	0	0	0	0	0	0	0	0	0	0	0	0	0	0	0	0	0	0	0	0	0	0	0	0	1	1
1044803	22	24413599	.	.	.	.	ADRBK2	adrenergic, beta, receptor kinase 2	Nonsynon	0.75	The Adrenergic System	0	4	3.95	0	0	0	0	0	0	0	0	0	0	0	0	0	0	0	0	0	0	0	0	0	0	0	0	0	0	0	0	0	0	0	0	0	0	0
1049227	6	31809680	.	.	.	.	CLIC1	chloride intracellular channel 1	Nonsynon	0.75	Special	0	4	3.95	0	0	0	0	0	0	0	0	0	0	0	0	0	0	0	0	0	0	0	0	0	0	0	0	0	0	0	0	0	0	0	0	0	0	0
2020870	1	169421583	0.033	0.133	0.136	0.1	FMO2	flavin containing monooxygenase 2 (non-functional)	Nonsynon	0.75	The Nicotine Metabolism System	0	4	3.95	0	0	0	0	1	1	1	1	1	0	1	1	0	0	1	1	0	1	1	1	1	1	1	1	1	1	1	1	1	1	1	1	1	1	1
28753776	1	1948887	.	.	.	.	GABRD	gamma-aminobutyric acid (GABA) A receptor, delta	Nonsynon	0.75	The GABA System	0	4	3.95	0	0	0	0	0	0	0	0	0	0	0	0	0	0	0	0	0	0	0	0	0	0	0	0	0	0	0	0	0	0	0	0	0	0	0
34614924	16	3759291	.	.	.	.	CREBBP	CREB binding protein (Rubinstein-Taybi syndrome)	Nonsynon	0.75	Special	0	4	3.95	0	0	0	0	0	0	0	0	0	0	0	0	0	0	0	0	0	0	0	0	0	0	0	0	0	0	0	0	0	0	0	0	0	0	0
41309443	1	1951430	.	.	.	.	GABRD	gamma-aminobutyric acid (GABA) A receptor, delta	Nonsynon	0.75	The GABA System	0	4	3.95	0	0	0	0	0	0	0	0	0	0	0	0	0	0	0	0	0	0	0	0	0	0	0	0	0	0	0	0	0	0	0	0	0	0	0
2020865	1	169443536	0.033	0	0	0.375	FMO2	flavin containing monooxygenase 2 (non-functional)	Nonsynon	0.74	The Nicotine Metabolism System	0	4	3.94	0	0	0	0	1	1	1	1	1	0	0	0	0	0	0	0	1	1	1	1	1	1	1	1	1	1	1	1	1	1	1	1	1	1	1
7416402	1	1946287	0	0	0	0	GABRD	gamma-aminobutyric acid (GABA) A receptor, delta	Nonsynon	0.74	The GABA System	0	4	3.94	0	0	0	0	0	0	0	0	0	0	0	0	0	0	0	0	0	0	0	0	0	0	0	0	0	0	0	0	0	0	0	0	0	0	0
34804134	5	147869220	.	.	.	.	HTR4	5-hydroxytryptamine (serotonin) receptor 4	Synon	0.91	The Serotonergic System	1	6	3.91	0	0	0	0	0	0	0	0	0	0	0	0	0	0	0	0	0	0	0	0	0	0	0	0	0	0	0	0	0	0	0	0	0	0	0
11956781	5	149611543	0	0	0	0	CAMK2A	calcium/calmodulin-dependent protein kinase (CaM kinase) II alpha	Nonsynon	0.69	Special	0	4	3.9	0	0	0	0	0	0	0	0	0	0	0	0	0	0	0	0	0	0	0	0	0	0	0	0	0	0	0	0	0	0	0	0	0	0	0
17854002	5	149611532	.	.	.	.	CAMK2A	calcium/calmodulin-dependent protein kinase (CaM kinase) II alpha	Nonsynon	0.69	Special	0	4	3.9	0	0	0	0	0	0	0	0	0	0	0	0	0	0	0	0	0	0	0	0	0	0	0	0	0	0	0	0	0	0	0	0	0	0	0
1054602	12	95165388	.	.	.	.	ELK3	ELK3, ETS-domain protein (SRF accessory protein 2)	Nonsynon	0.89	Special	0	3	3.9	0	0	0	0	0	0	0	0	0	0	0	0	0	0	0	0	0	0	0	0	0	0	0	0	0	0	0	0	0	0	0	0	0	0	0
1063997	12	95164982	.	.	.	.	ELK3	ELK3, ETS-domain protein (SRF accessory protein 2)	Nonsynon	0.89	Special	0	3	3.9	0	0	0	0	0	0	0	0	0	0	0	0	0	0	0	0	0	0	0	0	0	0	0	0	0	0	0	0	0	0	0	0	0	0	0
1063998	12	95165024	.	.	.	.	ELK3	ELK3, ETS-domain protein (SRF accessory protein 2)	Nonsynon	0.89	Special	0	3	3.9	0	0	0	0	0	0	0	0	0	0	0	0	0	0	0	0	0	0	0	0	0	0	0	0	0	0	0	0	0	0	0	0	0	0	0
1063999	12	95165095	0	0	0	0	ELK3	ELK3, ETS-domain protein (SRF accessory protein 2)	Nonsynon	0.89	Special	0	3	3.9	0	0	0	0	0	0	0	0	0	0	0	0	0	0	0	0	0	0	0	0	0	0	0	0	0	0	0	0	0	0	0	0	0	0	0
1064000	12	95165129	.	.	.	.	ELK3	ELK3, ETS-domain protein (SRF accessory protein 2)	Nonsynon	0.89	Special	0	3	3.9	0	0	0	0	0	0	0	0	0	0	0	0	0	0	0	0	0	0	0	0	0	0	0	0	0	0	0	0	0	0	0	0	0	0	0
28444655	12	95165319	.	.	.	.	ELK3	ELK3, ETS-domain protein (SRF accessory protein 2)	Nonsynon	0.89	Special	0	3	3.9	0	0	0	0	0	0	0	0	0	0	0	0	0	0	0	0	0	0	0	0	0	0	0	0	0	0	0	0	0	0	0	0	0	0	0
35332676	12	95165147	.	.	.	.	ELK3	ELK3, ETS-domain protein (SRF accessory protein 2)	Nonsynon	0.89	Special	0	3	3.9	0	0	0	0	0	0	0	0	0	0	0	0	0	0	0	0	0	0	0	0	0	0	0	0	0	0	0	0	0	0	0	0	0	0	0
41310789	4	46000236	.	.	.	.	GABRA2	gamma-aminobutyric acid (GABA) A receptor, alpha 2	Nonsynon	0.89	The GABA System	0	3	3.9	0	0	0	0	0	0	0	0	0	0	0	0	0	0	0	0	0	0	0	0	0	0	0	0	0	0	0	0	0	0	0	0	0	0	0
4678027	3	124649939	.	.	.	.	ADCY5	adenylate cyclase 5	Synon	0.88	Special	1	7	3.89	0	0	0	0	0	0	0	0	0	0	0	0	0	0	0	0	0	0	0	0	0	0	0	0	0	0	0	0	0	0	0	0	0	0	0
11688	1	59020581	0.067	0.033	0	0.25	JUN	jun oncogene	Synon	0.87	Goldman Gene	1	7	3.88	0	1	0	0	1	1	1	1	1	1	0	0	0	1	0	0	0	1	1	1	1	1	1	1	1	1	1	1	1	1	1	1	1	1	1
35843923	14	66416501	.	.	.	.	GPHN	gephyrin	Nonsynon	0.87	Goldman Gene	0	3	3.88	0	0	0	0	0	0	0	0	0	0	0	0	0	0	0	0	0	0	0	0	0	0	0	0	0	0	0	0	0	0	0	0	0	0	0
603280	12	50460704	0	0	0	0	SCN8A	sodium channel, voltage gated, type VIII, alpha subunit	Nonsynon	0.86	Special	0	3	3.87	0	0	0	0	0	0	0	0	1	0	0	0	0	0	0	0	0	0	0	0	0	0	0	0	0	0	0	0	0	0	0	0	0	1	1
28936395	1	23105933	.	.	.	.	EPHB2	EPH receptor B2	Nonsynon	0.86	Special	0	3	3.87	0	0	0	0	0	0	0	0	0	0	0	0	0	0	0	0	0	0	0	0	0	0	0	0	0	0	0	0	0	0	0	0	0	0	0
35262576	1	23105797	.	.	.	.	EPHB2	EPH receptor B2	Nonsynon	0.86	Special	0	3	3.87	0	0	0	0	0	0	0	0	0	0	0	0	0	0	0	0	0	0	0	0	0	0	0	0	0	0	0	0	0	0	0	0	0	0	0
45625035	8	20076178	.	.	.	.	SLC18A1	solute carrier family 18 (vesicular monoamine), member 1	Nonsynon	0.86	Special	0	3	3.87	0	0	0	0	0	0	0	0	0	0	0	0	0	0	0	0	0	0	0	0	0	0	0	0	0	0	0	0	0	0	0	0	0	0	0
1050577	6	36171770	.	.	.	.	MAPK14	mitogen-activated protein kinase 14	Nonsynon	0.85	Goldman Gene	0	3	3.86	0	0	0	0	0	0	0	0	0	0	0	0	0	0	0	0	0	0	0	0	0	0	0	0	0	0	0	0	0	0	0	0	0	0	0
1050578	6	36171786	.	.	.	.	MAPK14	mitogen-activated protein kinase 14	Nonsynon	0.85	Goldman Gene	0	3	3.86	0	0	0	0	0	0	0	0	0	0	0	0	0	0	0	0	0	0	0	0	0	0	0	0	0	0	0	0	0	0	0	0	0	0	0
1050579	6	36171792	.	.	.	.	MAPK14	mitogen-activated protein kinase 14	Nonsynon	0.85	Goldman Gene	0	3	3.86	0	0	0	0	0	0	0	0	0	0	0	0	0	0	0	0	0	0	0	0	0	0	0	0	0	0	0	0	0	0	0	0	0	0	0
1050580	6	36171794	.	.	.	.	MAPK14	mitogen-activated protein kinase 14	Nonsynon	0.85	Goldman Gene	0	3	3.86	0	0	0	0	0	0	0	0	0	0	0	0	0	0	0	0	0	0	0	0	0	0	0	0	0	0	0	0	0	0	0	0	0	0	0
1131209	6	36171765	.	.	.	.	MAPK14	mitogen-activated protein kinase 14	Nonsynon	0.85	Goldman Gene	0	3	3.86	0	0	0	0	0	0	0	0	0	0	0	0	0	0	0	0	0	0	0	0	0	0	0	0	0	0	0	0	0	0	0	0	0	0	0
34009575	3	121068145	.	.	.	.	GSK3B	glycogen synthase kinase 3 beta	Nonsynon	0.85	Goldman Gene	0	3	3.86	0	0	0	0	0	0	0	0	0	0	0	0	0	0	0	0	0	0	0	0	0	0	0	0	0	0	0	0	0	0	0	0	0	0	0
34266765	12	50343083	.	.	.	.	SCN8A	sodium channel, voltage gated, type VIII, alpha subunit	Nonsynon	0.85	Special	0	3	3.86	0	0	0	0	0	0	0	0	0	0	0	0	0	0	0	0	0	0	0	0	0	0	0	0	0	0	0	0	0	0	0	0	0	0	0
35418540	12	50343106	.	.	.	.	SCN8A	sodium channel, voltage gated, type VIII, alpha subunit	Nonsynon	0.85	Special	0	3	3.86	0	0	0	0	0	0	0	0	0	0	0	0	0	0	0	0	0	0	0	0	0	0	0	0	0	0	0	0	0	0	0	0	0	0	0
5919	17	42719539	0.042	0.244	0.182	0.167	ITGB3	integrin, beta 3 (platelet glycoprotein IIIa, antigen CD61)	Synon	0.84	Special	1	6	3.85	0	0	0	0	0	0	0	0	1	0	1	1	1	0	1	1	1	0	0	0	0	0	1	1	1	0	1	1	1	0	1	1	1	1	1
382505	11	61052125	0	0	0	0	SYT7	synaptotagmin VII	Nonsynon	0.84	Special	0	3	3.85	0	0	0	0	0	0	0	0	0	0	0	0	0	0	0	0	0	0	0	0	0	0	0	0	0	0	0	0	0	0	0	0	0	0	0
409166	11	61052023	0	0	0	0	SYT7	synaptotagmin VII	Nonsynon	0.84	Special	0	3	3.85	0	0	0	0	0	0	0	0	1	0	0	0	0	0	0	0	0	0	0	0	0	0	0	0	0	0	0	0	0	0	0	0	0	1	1
1050157	10	88844372	.	.	.	.	GLUD1	glutamate dehydrogenase 1	Synon	0.84	The Glutamatergic System	1	6	3.85	0	0	0	0	0	0	0	0	0	0	0	0	0	0	0	0	0	0	0	0	0	0	0	0	0	0	0	0	0	0	0	0	0	0	0
1129648	5	161232809	0	0	0	0	GABRA1	gamma-aminobutyric acid (GABA) A receptor, alpha 1	Nonsynon	0.84	The GABA System	0	3	3.85	0	0	0	0	0	0	0	0	0	0	0	0	0	0	0	0	0	0	0	0	0	0	0	0	0	0	0	0	0	0	0	0	0	0	0
2234911	8	143692146	.	.	.	.	ARC	activity-regulated cytoskeleton-associated protein	Synon	0.84	Special	1	6	3.85	0	0	0	0	0	0	0	0	0	0	0	0	0	0	0	0	0	0	0	0	0	0	0	0	0	0	0	0	0	0	0	0	0	0	0
4647014	1	59020809	0	0	0	0	JUN	jun oncogene	Synon	0.84	Goldman Gene	1	7	3.85	0	0	0	0	0	0	0	0	0	0	0	0	0	0	0	0	0	0	0	0	0	0	0	0	0	0	0	0	0	0	0	0	0	0	0
11946004	4	164492153	.	.	.	.	NPY5R	neuropeptide Y receptor Y5	Synon	0.84	Goldman Gene	1	6	3.85	0	0	0	0	0	0	0	0	0	0	0	0	0	0	0	0	0	0	0	0	0	0	0	0	0	0	0	0	0	0	0	0	0	0	0
12944151	17	61729473	.	.	.	.	PRKCA	protein kinase C, alpha	Nonsynon	0.84	Special	0	3	3.85	0	0	0	0	0	0	0	0	0	0	0	0	0	0	0	0	0	0	0	0	0	0	0	0	0	0	0	0	0	0	0	0	0	0	0
28686812	8	143691777	.	.	.	.	ARC	activity-regulated cytoskeleton-associated protein	Synon	0.84	Special	1	6	3.85	0	0	0	0	0	0	0	0	0	0	0	0	0	0	0	0	0	0	0	0	0	0	0	0	0	0	0	0	0	0	0	0	0	0	0
35414621	11	69943528	.	.	.	.	CTTN	cortactin	Synon	0.84	Special	1	6	3.85	0	0	0	0	0	0	0	0	0	0	0	0	0	0	0	0	0	0	0	0	0	0	0	0	0	0	0	0	0	0	0	0	0	0	0
45545034	1	20838975	.	.	.	.	PINK1	PTEN induced putative kinase 1	Nonsynon	0.84	Special	0	3	3.85	0	0	0	0	0	0	0	0	0	0	0	0	0	0	0	0	0	0	0	0	0	0	0	0	0	0	0	0	0	0	0	0	0	0	0
15908	17	42723336	0.284	0.456	0.489	0.449	ITGB3	integrin, beta 3 (platelet glycoprotein IIIa, antigen CD61)	Synon	0.83	Special	1	6	3.84	0	0	0	0	0	0	0	0	1	1	1	1	1	1	1	1	1	1	1	1	1	1	1	1	1	0	0	0	1	1	1	1	1	1	1
1054792	1	23111594	.	.	.	.	EPHB2	EPH receptor B2	Nonsynon	0.83	Special	0	3	3.84	0	0	0	0	0	0	0	0	0	0	0	0	0	0	0	0	0	0	0	0	0	0	0	0	0	0	0	0	0	0	0	0	0	0	0
1131608	17	76063983	.	.	.	.	NPTX1	neuronal pentraxin I	Nonsynon	0.83	Special	0	3	3.84	0	0	0	0	0	0	0	0	0	0	0	0	0	0	0	0	0	0	0	0	0	0	0	0	0	0	0	0	0	0	0	0	0	0	0
2229902	3	7469417	0.441	0.044	0.045	0	GRM7	glutamate receptor, metabotropic 7	Nonsynon	0.83	The Glutamatergic System	0	3	3.84	0	0	0	0	0	0	0	0	0	0	0	0	0	0	0	0	0	0	0	0	0	0	0	0	0	0	0	0	0	0	0	0	0	0	0
11544174	5	71051005	.	.	.	.	CART	CART prepropeptide	Synon	0.83	Goldman Gene	1	7	3.84	0	0	0	0	0	0	0	0	0	0	0	0	0	0	0	0	0	0	0	0	0	0	0	0	0	0	0	0	0	0	0	0	0	0	0
17174794	6	154452803	.	.	.	.	OPRM1	opioid receptor, mu 1	Nonsynon	0.83	The Opioid System	0	3	3.84	1	0	0	0	0	0	0	0	0	0	0	0	0	0	0	0	0	0	0	0	0	0	0	0	0	0	0	0	0	0	0	0	0	0	0
17174801	6	154452817	.	.	.	.	OPRM1	opioid receptor, mu 1	Nonsynon	0.83	The Opioid System	0	3	3.84	1	0	0	0	0	0	0	0	0	0	0	0	0	0	0	0	0	0	0	0	0	0	0	0	0	0	0	0	0	0	0	0	0	0	0
17852044	4	46009342	.	.	.	.	GABRA2	gamma-aminobutyric acid (GABA) A receptor, alpha 2	Nonsynon	0.83	The GABA System	0	3	3.84	0	0	0	0	0	0	0	0	0	0	0	0	0	0	0	0	0	0	0	0	0	0	0	0	0	0	0	0	0	0	0	0	0	0	0
28763973	6	36183304	.	.	.	.	MAPK14	mitogen-activated protein kinase 14	Nonsynon	0.83	Goldman Gene	0	3	3.84	0	0	0	0	0	0	0	0	0	0	0	0	0	0	0	0	0	0	0	0	0	0	0	0	0	0	0	0	0	0	0	0	0	0	0
34074916	6	154452933	.	.	.	.	OPRM1	opioid receptor, mu 1	Nonsynon	0.83	The Opioid System	0	3	3.84	0	0	0	0	0	0	0	0	0	0	0	0	0	0	0	0	0	0	0	0	0	0	0	0	0	0	0	0	0	0	0	0	0	0	0
34447235	3	10891692	.	.	.	.	SLC6A11	solute carrier family 6 (neurotransmitter transporter, GABA), member 11	Nonsynon	0.83	The GABA System	0	3	3.84	0	0	0	0	0	0	0	0	0	0	0	0	0	0	0	0	0	0	0	0	0	0	0	0	0	0	0	0	0	0	0	0	0	0	0
35401654	22	20453601	.	.	.	.	MAPK1	mitogen-activated protein kinase 1	Synon	0.83	Special	1	23	3.84	0	0	0	0	0	0	0	0	0	0	0	0	0	0	0	0	0	0	0	0	0	0	0	0	0	0	0	0	0	0	0	0	0	0	0
35854755	19	10747575	.	.	.	.	DNM2	dynamin 2	Nonsynon	0.83	Special	0	3	3.84	0	0	0	0	0	0	0	0	0	0	0	0	0	0	0	0	0	0	0	0	0	0	0	0	0	0	0	0	0	0	0	0	0	0	0
45496794	6	36184147	.	.	.	.	MAPK14	mitogen-activated protein kinase 14	Nonsynon	0.83	Goldman Gene	0	3	3.84	0	0	0	0	0	0	0	0	0	0	0	0	0	0	0	0	0	0	0	0	0	0	0	0	0	0	0	0	0	0	0	0	0	0	0
407740	11	61047235	0	0	0.012	0	SYT7	synaptotagmin VII	Nonsynon	0.82	Special	0	3	3.84	0	0	0	0	0	0	0	0	0	0	0	0	0	0	0	0	0	0	0	0	0	0	0	0	0	0	0	0	0	0	0	0	0	0	0
1042350	3	14460197	0	0	0	0	SLC6A6	solute carrier family 6 (neurotransmitter transporter, taurine), member 6	Nonsynon	0.82	Neurotransmitter Transporters	0	3	3.84	0	0	0	0	0	0	0	0	0	0	0	0	0	0	0	0	0	0	0	0	0	0	0	0	0	0	0	0	0	0	0	0	0	0	0
1042351	3	14460198	0	0	0	0	SLC6A6	solute carrier family 6 (neurotransmitter transporter, taurine), member 6	Nonsynon	0.82	Neurotransmitter Transporters	0	3	3.84	0	0	0	0	0	0	0	0	0	0	0	0	0	0	0	0	0	0	0	0	0	0	0	0	0	0	0	0	0	0	0	0	0	0	0
1372192	12	50431498	0	0	0	0	SCN8A	sodium channel, voltage gated, type VIII, alpha subunit	Nonsynon	0.82	Special	0	3	3.84	0	0	0	0	0	0	0	0	1	0	0	0	0	0	0	0	0	0	0	0	0	0	0	0	0	0	0	0	0	0	0	0	0	1	1
1799974	6	154453915	.	.	.	.	OPRM1	opioid receptor, mu 1	Nonsynon	0.82	The Opioid System	0	3	3.84	0	0	0	0	0	0	0	0	0	0	0	0	0	0	0	0	0	0	0	0	0	0	0	0	0	0	0	0	0	0	0	0	0	0	0
2076489	6	29684416	0	0	0.068	0	GABBR1	gamma-aminobutyric acid (GABA) B receptor, 1	Nonsynon	0.82	The GABA System	0	3	3.84	0	0	0	0	0	0	0	0	0	0	0	1	0	0	0	1	0	0	0	1	0	0	0	1	0	0	0	1	0	0	0	1	0	0	0
3729910	22	20492126	0.034	0.033	0	0.025	MAPK1	mitogen-activated protein kinase 1	Synon	0.82	Special	1	23	3.84	0	0	0	0	0	0	0	0	0	0	0	0	0	0	0	0	0	0	0	0	0	0	0	0	0	0	0	0	0	0	0	0	0	0	0
11575856	6	154454013	.	.	.	.	OPRM1	opioid receptor, mu 1	Nonsynon	0.82	The Opioid System	0	3	3.84	0	0	0	0	0	0	0	0	0	0	0	0	0	0	0	0	0	0	0	0	0	0	0	0	0	0	0	0	0	0	0	0	0	0	0
17174822	6	154453929	.	.	.	.	OPRM1	opioid receptor, mu 1	Nonsynon	0.82	The Opioid System	0	3	3.84	1	0	0	0	0	0	0	0	0	0	0	0	0	0	0	0	0	0	0	0	0	0	0	0	0	0	0	0	0	0	0	0	0	0	0
17174829	6	154453956	.	.	.	.	OPRM1	opioid receptor, mu 1	Nonsynon	0.82	The Opioid System	0	3	3.84	1	0	0	0	0	0	0	0	0	0	0	0	0	0	0	0	0	0	0	0	0	0	0	0	0	0	0	0	0	0	0	0	0	0	0
34069372	1	71645812	.	.	.	.	NEGR1	neuronal growth regulator 1	Nonsynon	0.82	The Opioid System	0	3	3.84	0	0	0	0	0	0	0	0	0	0	0	0	0	0	0	0	0	0	0	0	0	0	0	0	0	0	0	0	0	0	0	0	0	0	0
41289154	1	71645742	.	.	.	.	NEGR1	neuronal growth regulator 1	Nonsynon	0.82	The Opioid System	0	3	3.84	0	0	0	0	0	0	0	0	0	0	0	0	0	0	0	0	0	0	0	0	0	0	0	0	0	0	0	0	0	0	0	0	0	0	0
41305781	4	46082908	.	.	.	.	GABRA2	gamma-aminobutyric acid (GABA) A receptor, alpha 2	Nonsynon	0.82	The GABA System	0	3	3.84	0	0	0	0	0	0	0	0	0	0	0	0	0	0	0	0	0	0	0	0	0	0	0	0	0	0	0	0	0	0	0	0	0	0	0
327222	8	26537688	0	0.013	0.033	0.102	DPYSL2	dihydropyrimidinase-like 2	Synon	0.81	Special	1	10	3.83	0	0	0	0	0	0	0	0	1	0	0	0	1	0	0	0	1	0	0	0	0	0	0	0	0	0	0	0	0	0	0	0	1	1	1
4710963	6	21173393	0	0	0	0	CDKAL1	CDK5 regulatory subunit associated protein 1-like 1	Nonsynon	0.81	Special	0	3	3.83	0	0	0	0	0	0	0	0	0	0	0	0	0	0	0	0	0	0	0	0	0	0	0	0	0	0	0	0	0	0	0	0	0	0	0
4875703	8	3211968	0.258	0.4	0.289	0.358	CSMD1	CUB and Sushi multiple domains 1	Nonsynon	0.81	Special	0	3	3.83	0	0	0	0	0	0	0	0	1	1	1	1	1	1	1	1	1	1	1	1	1	1	1	1	1	1	1	1	1	1	1	1	1	1	1
34406842	17	62169281	.	.	.	.	PRKCA	protein kinase C, alpha	Nonsynon	0.81	Special	0	3	3.83	0	0	0	0	0	0	0	0	0	0	0	0	0	0	0	0	0	0	0	0	0	0	0	0	0	0	0	0	0	0	0	0	0	0	0
34427887	6	154609555	.	.	.	.	OPRM1	opioid receptor, mu 1	Nonsynon	0.81	The Opioid System	0	3	3.83	0	0	0	0	0	0	0	0	0	0	0	0	0	0	0	0	0	0	0	0	0	0	0	0	0	0	0	0	0	0	0	0	0	0	0
35955195	11	69946728	.	.	.	.	CTTN	cortactin	Synon	0.81	Special	1	6	3.83	0	0	0	0	0	0	0	0	0	0	0	0	0	0	0	0	0	0	0	0	0	0	0	0	0	0	0	0	0	0	0	0	0	0	0
36042022	8	3876882	.	.	.	.	CSMD1	CUB and Sushi multiple domains 1	Nonsynon	0.81	Special	0	3	3.83	0	0	0	0	0	0	0	0	0	0	0	0	0	0	0	0	0	0	0	0	0	0	0	0	0	0	0	0	0	0	0	0	0	0	0
36059472	1	53328148	.	.	.	.	SLC1A7	solute carrier family 1 (glutamate transporter), member 7	Nonsynon	0.81	The Glutamatergic System	0	3	3.83	0	0	0	0	0	0	0	0	0	0	0	0	0	0	0	0	0	0	0	0	0	0	0	0	0	0	0	0	0	0	0	0	0	0	0
406970	7	73158151	0	0	0	0	LIMK1	LIM domain kinase 1	Nonsynon	0.8	Special	0	3	3.82	0	0	0	0	0	0	0	0	0	0	0	0	0	0	0	0	0	0	0	0	0	0	0	0	0	0	0	0	0	0	0	0	0	0	0
458683	7	73158467	0	0	0	0	LIMK1	LIM domain kinase 1	Nonsynon	0.8	Special	0	3	3.82	0	0	0	0	0	0	0	0	1	0	0	0	0	0	0	0	0	0	0	0	0	0	0	0	0	0	0	0	0	0	0	0	0	1	1
519972	4	45947219	0	0	0	0	GABRA2	gamma-aminobutyric acid (GABA) A receptor, alpha 2	Nonsynon	0.8	The GABA System	0	3	3.82	0	0	0	0	0	0	0	0	0	0	0	0	0	0	0	0	0	0	0	0	0	0	0	0	0	0	0	0	0	0	0	0	0	0	0
643301	11	69957414	0.125	0	0	0.275	CTTN	cortactin	Synon	0.8	Special	1	6	3.82	0	0	0	0	1	1	1	1	1	1	0	0	1	1	0	0	1	1	1	1	1	1	1	1	1	1	1	1	1	1	1	1	1	1	1
1288401	1	53326342	0.289	0.244	0.337	0.08	SLC1A7	solute carrier family 1 (glutamate transporter), member 7	Nonsynon	0.8	The Glutamatergic System	0	3	3.82	0	0	0	0	0	0	0	0	0	0	0	0	0	0	0	0	0	1	0	0	1	1	0	0	1	1	0	0	1	1	1	1	1	1	1
1805057	6	29689100	.	.	.	.	GABBR1	gamma-aminobutyric acid (GABA) B receptor, 1	Nonsynon	0.8	The GABA System	0	3	3.82	0	0	0	0	0	0	0	0	0	0	0	0	0	0	0	0	0	0	0	0	0	0	0	0	0	0	0	0	0	0	0	0	0	0	0
6691840	1	37098064	0.216	0.044	0	0.339	GRIK3	glutamate receptor, ionotropic, kainate 3	Nonsynon	0.8	The Glutamatergic System	0	3	3.82	0	0	0	0	0	0	0	0	1	0	0	0	0	0	0	0	0	0	0	0	0	0	0	0	0	0	0	0	0	0	0	0	0	1	1
9421572	10	88810769	.	.	.	.	GLUD1	glutamate dehydrogenase 1	Synon	0.8	The Glutamatergic System	1	6	3.82	0	0	0	0	0	0	0	0	0	0	0	0	0	0	0	0	0	0	0	0	0	0	0	0	0	0	0	0	0	0	0	0	0	0	0
17110563	12	70652573	.	.	.	.	TPH2	tryptophan hydroxylase 2	Nonsynon	0.8	The Serotonergic System	0	3	3.82	0	1	0	0	0	0	0	0	0	0	0	0	0	0	0	0	0	0	0	0	0	0	0	0	0	0	0	0	0	0	0	0	0	0	0
17854104	6	29703337	.	.	.	.	GABBR1	gamma-aminobutyric acid (GABA) B receptor, 1	Nonsynon	0.8	The GABA System	0	3	3.82	0	0	0	0	0	0	0	0	0	0	0	0	0	0	0	0	0	0	0	0	0	0	0	0	0	0	0	0	0	0	0	0	0	0	0
34777535	12	50442672	.	.	.	.	SCN8A	sodium channel, voltage gated, type VIII, alpha subunit	Nonsynon	0.8	Special	0	3	3.82	0	0	0	0	0	0	0	0	0	0	0	0	0	0	0	0	0	0	0	0	0	0	0	0	0	0	0	0	0	0	0	0	0	0	0
34798360	1	53326427	.	.	.	.	SLC1A7	solute carrier family 1 (glutamate transporter), member 7	Nonsynon	0.8	The Glutamatergic System	0	3	3.82	0	0	0	0	0	0	0	0	0	0	0	0	0	0	0	0	0	0	0	0	0	0	0	0	0	0	0	0	0	0	0	0	0	0	0
35565650	4	45947170	.	.	.	.	GABRA2	gamma-aminobutyric acid (GABA) A receptor, alpha 2	Nonsynon	0.8	The GABA System	0	3	3.82	0	0	0	0	0	0	0	0	0	0	0	0	0	0	0	0	0	0	0	0	0	0	0	0	0	0	0	0	0	0	0	0	0	0	0
35821805	3	14464324	.	.	.	.	SLC6A6	solute carrier family 6 (neurotransmitter transporter, taurine), member 6	Nonsynon	0.8	Neurotransmitter Transporters	0	3	3.82	0	0	0	0	0	0	0	0	0	0	0	0	0	0	0	0	0	0	0	0	0	0	0	0	0	0	0	0	0	0	0	0	0	0	0
35882952	1	23062140	.	.	.	.	EPHB2	EPH receptor B2	Nonsynon	0.8	Special	0	3	3.82	0	0	0	0	0	0	0	0	0	0	0	0	0	0	0	0	0	0	0	0	0	0	0	0	0	0	0	0	0	0	0	0	0	0	0
1065756	1	163916475	0	0	0.023	0.034	ALDH9A1	aldehyde dehydrogenase 9 family, member A1	Nonsynon	0.79	The Alcohol System	0	3	3.81	0	0	0	1	0	0	0	0	0	0	0	0	0	1	1	1	1	0	0	0	0	0	0	0	0	0	0	0	0	0	0	0	0	0	0
2887147	12	70674527	0	0	0	0	TPH2	tryptophan hydroxylase 2	Nonsynon	0.79	The Serotonergic System	0	3	3.81	0	0	0	0	0	0	0	0	1	0	0	0	0	0	0	0	0	0	0	0	0	0	0	0	0	0	0	0	0	0	0	0	0	1	1
3738136	1	20844698	.	0.244	0.205	0	PINK1	PTEN induced putative kinase 1	Nonsynon	0.79	Special	0	3	3.81	0	0	0	0	0	0	0	0	1	0	0	0	0	0	0	0	0	0	0	0	0	0	0	0	0	0	0	0	0	0	0	0	0	1	1
3745674	19	10754735	0	0.011	0.011	0	DNM2	dynamin 2	Nonsynon	0.79	Special	0	3	3.81	0	0	0	0	0	0	0	0	1	0	0	0	0	0	0	0	0	0	0	0	0	0	0	0	0	0	0	0	0	0	0	0	0	1	1
6958498	7	107621849	0.192	0.089	0.136	0.441	NRCAM	neuronal cell adhesion molecule	Nonsynon	0.79	Special	0	3	3.81	0	0	0	0	0	0	0	0	1	1	1	1	1	1	1	1	1	0	1	1	1	0	1	1	1	1	1	1	1	0	1	1	1	1	1
10088378	8	3252997	0.31	0.444	0.273	0.373	CSMD1	CUB and Sushi multiple domains 1	Nonsynon	0.79	Special	0	3	3.81	0	0	0	0	0	0	0	0	1	0	0	0	0	1	0	0	0	1	0	0	0	1	1	1	1	1	1	1	1	1	1	1	1	1	1
11477062	8	3254417	.	.	.	.	CSMD1	CUB and Sushi multiple domains 1	Nonsynon	0.79	Special	0	3	3.81	0	0	0	0	0	0	0	0	0	0	0	0	0	0	0	0	0	0	0	0	0	0	0	0	0	0	0	0	0	0	0	0	0	0	0
11541655	7	73160146	.	.	.	.	LIMK1	LIM domain kinase 1	Nonsynon	0.79	Special	0	3	3.81	0	0	0	0	0	0	0	0	0	0	0	0	0	0	0	0	0	0	0	0	0	0	0	0	0	0	0	0	0	0	0	0	0	0	0
12621643	2	223626227	0.205	0.256	0.333	0.457	KCNE4	potassium voltage-gated channel, Isk-related family, member 4	Nonsynon	0.79	Special	0	3	3.81	0	0	1	1	0	0	0	0	1	1	1	1	1	1	1	1	1	0	0	1	0	0	0	1	0	0	0	1	0	0	0	1	0	1	1
13409084	2	223625931	0	0	0	0	KCNE4	potassium voltage-gated channel, Isk-related family, member 4	Nonsynon	0.79	Special	0	3	3.81	0	0	0	0	0	0	0	0	1	0	0	0	0	0	0	0	0	0	0	0	0	0	0	0	0	0	0	0	0	0	0	0	0	1	1
34128718	8	3254412	.	.	.	.	CSMD1	CUB and Sushi multiple domains 1	Nonsynon	0.79	Special	0	3	3.81	0	0	0	0	0	0	0	0	0	0	0	0	0	0	0	0	0	0	0	0	0	0	0	0	0	0	0	0	0	0	0	0	0	0	0
34640770	5	71052126	.	.	.	.	CART	CART prepropeptide	Synon	0.79	Goldman Gene	1	7	3.81	0	0	0	0	0	0	0	0	0	0	0	0	0	0	0	0	0	0	0	0	0	0	0	0	0	0	0	0	0	0	0	0	0	0	0
34792654	18	54159957	.	.	.	.	NEDD4L	neural precursor cell expressed, developmentally down-regulated 4-like	Nonsynon	0.79	Special	0	3	3.81	0	0	0	0	0	0	0	0	0	0	0	0	0	0	0	0	0	0	0	0	0	0	0	0	0	0	0	0	0	0	0	0	0	0	0
35223687	5	161235185	.	.	.	.	GABRA1	gamma-aminobutyric acid (GABA) A receptor, alpha 1	Nonsynon	0.79	The GABA System	0	3	3.81	0	0	0	0	0	0	0	0	0	0	0	0	0	0	0	0	0	0	0	0	0	0	0	0	0	0	0	0	0	0	0	0	0	0	0
35590968	17	62165363	.	.	.	.	PRKCA	protein kinase C, alpha	Nonsynon	0.79	Special	0	3	3.81	0	0	0	0	0	0	0	0	0	0	0	0	0	0	0	0	0	0	0	0	0	0	0	0	0	0	0	0	0	0	0	0	0	0	0
35813094	1	20844703	.	.	.	.	PINK1	PTEN induced putative kinase 1	Nonsynon	0.79	Special	0	3	3.81	0	0	0	0	0	0	0	0	0	0	0	0	0	0	0	0	0	0	0	0	0	0	0	0	0	0	0	0	0	0	0	0	0	0	0
35827364	7	73151465	.	.	.	.	LIMK1	LIM domain kinase 1	Nonsynon	0.79	Special	0	3	3.81	0	0	0	0	0	0	0	0	0	0	0	0	0	0	0	0	0	0	0	0	0	0	0	0	0	0	0	0	0	0	0	0	0	0	0
35944172	5	78788558	.	.	.	.	HOMER1	homer homolog 1 (Drosophila)	Synon	0.79	Special	1	6	3.81	0	0	0	0	0	0	0	0	0	0	0	0	0	0	0	0	0	0	0	0	0	0	0	0	0	0	0	0	0	0	0	0	0	0	0
41284017	3	14498300	.	.	.	.	SLC6A6	solute carrier family 6 (neurotransmitter transporter, taurine), member 6	Nonsynon	0.79	Neurotransmitter Transporters	0	3	3.81	0	0	0	0	0	0	0	0	0	0	0	0	0	0	0	0	0	0	0	0	0	0	0	0	0	0	0	0	0	0	0	0	0	0	0
708621	8	26566709	0.267	0.411	0.318	0.2	DPYSL2	dihydropyrimidinase-like 2	Synon	0.78	Special	1	10	3.8	0	0	0	1	1	1	1	1	1	0	1	1	0	1	1	1	1	1	1	1	1	1	1	1	1	1	1	1	1	1	1	1	1	1	1
1043895	7	107612200	0	0	0	0	NRCAM	neuronal cell adhesion molecule	Nonsynon	0.78	Special	0	3	3.8	0	0	0	0	0	0	0	0	0	0	0	0	0	0	0	0	0	0	0	0	0	0	0	0	0	0	0	0	0	0	0	0	0	0	0
1803545	22	20457165	0	0	0.034	0	MAPK1	mitogen-activated protein kinase 1	Synon	0.78	Special	1	23	3.8	0	0	0	0	0	0	0	0	1	0	0	0	0	0	0	0	0	0	0	0	0	0	0	0	0	0	0	0	0	0	0	0	0	1	1
2230674	12	49494389	0.042	0	0	0	ATF1	activating transcription factor 1	Nonsynon	0.78	Special	0	3	3.8	0	0	1	1	0	0	0	0	0	1	1	1	1	1	1	1	1	0	0	0	0	0	0	0	0	0	0	0	0	0	0	0	0	0	0
2276305	11	113308314	0.026	0.233	0.182	0.086	HTR3B	5-hydroxytryptamine (serotonin) receptor 3B	Synon	0.78	The Serotonergic System	1	7	3.8	0	0	0	0	0	0	0	0	0	0	1	1	0	0	1	1	0	0	0	1	0	0	1	1	0	0	1	1	0	0	1	1	0	0	1
3796191	3	127355074	.	0.024	0.047	0.058	ALDH1L1	aldehyde dehydrogenase 1 family, member L1	Nonsynon	0.78	The Alcohol System	0	3	3.8	0	0	0	0	0	0	1	0	1	0	0	0	0	0	0	0	0	0	0	0	0	0	0	0	0	1	1	1	1	0	0	0	0	1	1
3802303	8	3241175	0.355	0.089	0.133	0.302	CSMD1	CUB and Sushi multiple domains 1	Nonsynon	0.78	Special	0	3	3.8	0	0	0	1	0	0	0	0	1	0	0	0	0	1	1	1	1	0	0	0	0	0	0	0	0	0	0	0	0	0	0	0	0	1	1
7634846	3	7478377	0.008	0	0	0	GRM7	glutamate receptor, metabotropic 7	Nonsynon	0.78	The Glutamatergic System	0	3	3.8	0	0	0	0	0	0	0	0	1	0	0	0	0	0	0	0	0	0	0	0	0	0	0	0	0	0	0	0	0	0	0	0	0	1	1
11786691	8	26497394	0.083	0	0	0.075	DPYSL2	dihydropyrimidinase-like 2	Synon	0.78	Special	1	10	3.8	0	0	0	0	0	0	0	0	1	1	0	0	0	1	0	0	1	1	0	0	0	1	0	0	0	1	0	0	0	1	0	0	0	1	1
34074837	8	2953533	.	.	.	.	CSMD1	CUB and Sushi multiple domains 1	Nonsynon	0.78	Special	0	3	3.8	0	0	0	0	0	0	0	0	0	0	0	0	0	0	0	0	0	0	0	0	0	0	0	0	0	0	0	0	0	0	0	0	0	0	0
34443453	8	3034881	.	.	.	.	CSMD1	CUB and Sushi multiple domains 1	Nonsynon	0.78	Special	0	3	3.8	0	0	0	0	0	0	0	0	0	0	0	0	0	0	0	0	0	0	0	0	0	0	0	0	0	0	0	0	0	0	0	0	0	0	0
34652555	8	3034959	.	.	.	.	CSMD1	CUB and Sushi multiple domains 1	Nonsynon	0.78	Special	0	3	3.8	0	0	0	0	0	0	0	0	0	0	0	0	0	0	0	0	0	0	0	0	0	0	0	0	0	0	0	0	0	0	0	0	0	0	0
34854910	8	2953638	.	.	.	.	CSMD1	CUB and Sushi multiple domains 1	Nonsynon	0.78	Special	0	3	3.8	0	0	0	0	0	0	0	0	0	0	0	0	0	0	0	0	0	0	0	0	0	0	0	0	0	0	0	0	0	0	0	0	0	0	0
35125470	8	3034902	.	.	.	.	CSMD1	CUB and Sushi multiple domains 1	Nonsynon	0.78	Special	0	3	3.8	0	0	0	0	0	0	0	0	0	0	0	0	0	0	0	0	0	0	0	0	0	0	0	0	0	0	0	0	0	0	0	0	0	0	0
35179549	12	49494117	.	.	.	.	ATF1	activating transcription factor 1	Nonsynon	0.78	Special	0	3	3.8	0	0	0	0	0	0	0	0	0	0	0	0	0	0	0	0	0	0	0	0	0	0	0	0	0	0	0	0	0	0	0	0	0	0	0
35231838	3	14510197	.	.	.	.	GRIP2	glutamate receptor interacting protein 2	Nonsynon	0.78	The Glutamatergic System	0	3	3.8	0	0	0	0	0	0	0	0	0	0	0	0	0	0	0	0	0	0	0	0	0	0	0	0	0	0	0	0	0	0	0	0	0	0	0
35285195	3	10955036	.	.	.	.	SLC6A11	solute carrier family 6 (neurotransmitter transporter, GABA), member 11	Nonsynon	0.78	The GABA System	0	3	3.8	0	0	0	0	0	0	0	0	0	0	0	0	0	0	0	0	0	0	0	0	0	0	0	0	0	0	0	0	0	0	0	0	0	0	0
35310352	8	2783562	.	.	.	.	CSMD1	CUB and Sushi multiple domains 1	Nonsynon	0.78	Special	0	3	3.8	0	0	0	0	0	0	0	0	0	0	0	0	0	0	0	0	0	0	0	0	0	0	0	0	0	0	0	0	0	0	0	0	0	0	0
35522636	8	3129169	.	.	.	.	CSMD1	CUB and Sushi multiple domains 1	Nonsynon	0.78	Special	0	3	3.8	0	0	0	0	0	0	0	0	0	0	0	0	0	0	0	0	0	0	0	0	0	0	0	0	0	0	0	0	0	0	0	0	0	0	0
35540084	3	7478360	.	.	.	.	GRM7	glutamate receptor, metabotropic 7	Nonsynon	0.78	The Glutamatergic System	0	3	3.8	0	0	0	0	0	0	0	0	0	0	0	0	0	0	0	0	0	0	0	0	0	0	0	0	0	0	0	0	0	0	0	0	0	0	0
35676422	8	3034965	.	.	.	.	CSMD1	CUB and Sushi multiple domains 1	Nonsynon	0.78	Special	0	3	3.8	0	0	0	0	0	0	0	0	0	0	0	0	0	0	0	0	0	0	0	0	0	0	0	0	0	0	0	0	0	0	0	0	0	0	0
41285470	14	66460734	.	.	.	.	GPHN	gephyrin	Nonsynon	0.78	Goldman Gene	0	3	3.8	0	0	0	0	0	0	0	0	0	0	0	0	0	0	0	0	0	0	0	0	0	0	0	0	0	0	0	0	0	0	0	0	0	0	0
4634	17	42724788	.	.	.	.	ITGB3	integrin, beta 3 (platelet glycoprotein IIIa, antigen CD61)	Synon	0.77	Special	1	6	3.8	0	0	0	0	0	0	0	0	0	0	0	0	0	0	0	0	0	0	0	0	0	0	0	0	0	0	0	0	0	0	0	0	0	0	0
4642	17	42724776	0.246	0.284	0.344	0.28	ITGB3	integrin, beta 3 (platelet glycoprotein IIIa, antigen CD61)	Synon	0.77	Special	1	6	3.8	0	0	0	0	0	0	0	0	1	1	0	0	0	1	1	1	1	1	1	1	1	1	1	1	1	1	1	1	0	1	1	1	1	1	1
5920	17	42715895	0	0	0	0.033	ITGB3	integrin, beta 3 (platelet glycoprotein IIIa, antigen CD61)	Synon	0.77	Special	1	6	3.8	0	0	0	0	0	0	0	0	0	0	0	0	0	0	0	0	0	0	0	0	0	0	0	0	0	0	0	0	0	0	0	0	0	0	0
178412	7	73173273	0.008	0	0	0	LIMK1	LIM domain kinase 1	Nonsynon	0.77	Special	0	3	3.8	0	0	0	0	0	0	0	0	0	0	0	0	0	0	0	0	0	0	0	0	0	0	0	0	0	0	0	0	0	0	0	0	0	0	0
1042352	3	14474570	.	.	.	.	SLC6A6	solute carrier family 6 (neurotransmitter transporter, taurine), member 6	Nonsynon	0.77	Neurotransmitter Transporters	0	3	3.8	0	0	0	0	0	0	0	0	0	0	0	0	0	0	0	0	0	0	0	0	0	0	0	0	0	0	0	0	0	0	0	0	0	0	0
7488262	12	70711706	0	0	0	0	TPH2	tryptophan hydroxylase 2	Nonsynon	0.77	The Serotonergic System	0	3	3.8	0	0	0	0	0	0	0	0	1	0	0	0	0	0	0	0	0	0	0	0	0	0	0	0	0	0	0	0	0	0	0	0	0	1	1
12021744	1	53341666	0	0	0	0	SLC1A7	solute carrier family 1 (glutamate transporter), member 7	Nonsynon	0.77	The Glutamatergic System	0	3	3.8	0	0	0	0	0	0	0	0	1	0	0	0	0	0	0	0	0	0	0	0	0	0	0	0	0	0	0	0	0	0	0	0	0	1	1
17706743	5	147909933	0.083	0.011	0	0	HTR4	5-hydroxytryptamine (serotonin) receptor 4	Synon	0.77	The Serotonergic System	1	6	3.8	0	0	0	0	0	0	0	0	0	0	0	0	0	0	0	0	0	0	0	0	0	0	0	0	0	0	0	0	0	0	0	0	0	0	0
34079122	8	2800582	.	.	.	.	CSMD1	CUB and Sushi multiple domains 1	Nonsynon	0.77	Special	0	3	3.8	0	0	0	0	0	0	0	0	0	0	0	0	0	0	0	0	0	0	0	0	0	0	0	0	0	0	0	0	0	0	0	0	0	0	0
34086507	8	2818101	.	.	.	.	CSMD1	CUB and Sushi multiple domains 1	Nonsynon	0.77	Special	0	3	3.8	0	0	0	0	0	0	0	0	0	0	0	0	0	0	0	0	0	0	0	0	0	0	0	0	0	0	0	0	0	0	0	0	0	0	0
34208370	1	20848297	.	.	.	.	PINK1	PTEN induced putative kinase 1	Nonsynon	0.77	Special	0	3	3.8	0	0	0	0	0	0	0	0	0	0	0	0	0	0	0	0	0	0	0	0	0	0	0	0	0	0	0	0	0	0	0	0	0	0	0
34337712	8	2796137	.	.	.	.	CSMD1	CUB and Sushi multiple domains 1	Nonsynon	0.77	Special	0	3	3.8	0	0	0	0	0	0	0	0	0	0	0	0	0	0	0	0	0	0	0	0	0	0	0	0	0	0	0	0	0	0	0	0	0	0	0
34416410	1	20848252	.	.	.	.	PINK1	PTEN induced putative kinase 1	Nonsynon	0.77	Special	0	3	3.8	0	0	0	0	0	0	0	0	0	0	0	0	0	0	0	0	0	0	0	0	0	0	0	0	0	0	0	0	0	0	0	0	0	0	0
34602557	8	2800666	.	.	.	.	CSMD1	CUB and Sushi multiple domains 1	Nonsynon	0.77	Special	0	3	3.8	0	0	0	0	0	0	0	0	0	0	0	0	0	0	0	0	0	0	0	0	0	0	0	0	0	0	0	0	0	0	0	0	0	0	0
34721383	7	107608055	.	.	.	.	NRCAM	neuronal cell adhesion molecule	Nonsynon	0.77	Special	0	3	3.8	0	0	0	0	0	0	0	0	0	0	0	0	0	0	0	0	0	0	0	0	0	0	0	0	0	0	0	0	0	0	0	0	0	0	0
45467995	1	20848142	.	.	.	.	PINK1	PTEN induced putative kinase 1	Nonsynon	0.77	Special	0	3	3.8	0	0	0	0	0	0	0	0	0	0	0	0	0	0	0	0	0	0	0	0	0	0	0	0	0	0	0	0	0	0	0	0	0	0	0
45539432	1	20848189	.	.	.	.	PINK1	PTEN induced putative kinase 1	Nonsynon	0.77	Special	0	3	3.8	0	0	0	0	0	0	0	0	0	0	0	0	0	0	0	0	0	0	0	0	0	0	0	0	0	0	0	0	0	0	0	0	0	0	0
646509	18	54063712	0	0	0	0	NEDD4L	neural precursor cell expressed, developmentally down-regulated 4-like	Nonsynon	0.76	Special	0	3	3.79	0	0	0	0	0	0	0	0	0	0	0	0	0	0	0	0	0	0	0	0	0	0	0	0	0	0	0	0	0	0	0	0	0	0	0
667595	8	2819546	0.183	0.144	0.156	0.267	CSMD1	CUB and Sushi multiple domains 1	Nonsynon	0.76	Special	0	3	3.79	0	0	0	0	0	0	0	0	0	1	0	0	0	1	1	1	1	1	1	1	1	1	1	1	1	1	1	1	1	1	1	1	1	1	1
2298397	11	69931123	0.333	0.189	0.056	0.042	CTTN	cortactin	Synon	0.76	Special	1	6	3.79	0	0	0	0	0	0	0	0	1	1	1	1	0	1	1	1	0	1	1	1	0	1	1	1	0	1	1	1	0	1	1	1	0	1	1
7349186	1	20843707	.	.	.	.	PINK1	PTEN induced putative kinase 1	Nonsynon	0.76	Special	0	3	3.79	0	0	0	0	0	0	0	0	0	0	0	0	0	0	0	0	0	0	0	0	0	0	0	0	0	0	0	0	0	0	0	0	0	0	0
11152067	18	54185968	0	0	0	0	NEDD4L	neural precursor cell expressed, developmentally down-regulated 4-like	Nonsynon	0.76	Special	0	3	3.79	0	0	0	0	0	0	0	0	0	0	0	0	0	0	0	0	0	0	0	0	0	0	0	0	0	0	0	0	0	0	0	0	0	0	0
11541654	7	73159364	.	.	.	.	LIMK1	LIM domain kinase 1	Nonsynon	0.76	Special	0	3	3.79	0	0	0	0	0	0	0	0	0	0	0	0	0	0	0	0	0	0	0	0	0	0	0	0	0	0	0	0	0	0	0	0	0	0	0
11541656	7	73159380	.	.	.	.	LIMK1	LIM domain kinase 1	Nonsynon	0.76	Special	0	3	3.79	0	0	0	0	0	0	0	0	0	0	0	0	0	0	0	0	0	0	0	0	0	0	0	0	0	0	0	0	0	0	0	0	0	0	0
17215759	8	20073265	.	.	.	.	SLC18A1	solute carrier family 18 (vesicular monoamine), member 1	Nonsynon	0.76	Special	0	3	3.79	0	0	0	0	0	0	0	0	0	0	0	0	0	0	0	0	0	0	0	0	0	0	0	0	0	0	0	0	0	0	0	0	0	0	0
35066743	7	107637124	.	.	.	.	NRCAM	neuronal cell adhesion molecule	Nonsynon	0.76	Special	0	3	3.79	0	0	0	0	0	0	0	0	0	0	0	0	0	0	0	0	0	0	0	0	0	0	0	0	0	0	0	0	0	0	0	0	0	0	0
35315246	6	72062772	.	.	.	.	OGFRL1	opioid growth factor receptor-like 1	Nonsynon	0.76	The Opioid System	0	3	3.79	0	0	0	0	0	0	0	0	0	0	0	0	0	0	0	0	0	0	0	0	0	0	0	0	0	0	0	0	0	0	0	0	0	0	0
41274348	11	18003699	.	.	.	.	TPH1	tryptophan hydroxylase 1 (tryptophan 5-monooxygenase)	Nonsynon	0.76	The Serotonergic System	0	3	3.79	0	0	0	0	0	0	0	0	0	0	0	0	0	0	0	0	0	0	0	0	0	0	0	0	0	0	0	0	0	0	0	0	0	0	0
41274350	11	18003808	.	.	.	.	TPH1	tryptophan hydroxylase 1 (tryptophan 5-monooxygenase)	Nonsynon	0.76	The Serotonergic System	0	3	3.79	0	0	0	0	0	0	0	0	0	0	0	0	0	0	0	0	0	0	0	0	0	0	0	0	0	0	0	0	0	0	0	0	0	0	0
667859	8	2808152	.	.	.	.	CSMD1	CUB and Sushi multiple domains 1	Nonsynon	0.75	Special	0	3	3.78	0	0	0	0	0	0	0	0	0	0	0	0	0	0	0	0	0	0	0	0	0	0	0	0	0	0	0	0	0	0	0	0	0	0	0
1042753	6	154402523	.	.	.	.	OPRM1	opioid receptor, mu 1	Nonsynon	0.75	The Opioid System	0	3	3.78	0	0	0	0	0	0	0	0	0	0	0	0	0	0	0	0	0	0	0	0	0	0	0	0	0	0	0	0	0	0	0	0	0	0	0
1043424	1	20849587	0.342	0.378	0.295	0.2	PINK1	PTEN induced putative kinase 1	Nonsynon	0.75	Special	0	3	3.78	0	0	1	1	1	1	1	1	1	1	1	1	1	1	1	1	1	1	1	1	1	1	1	1	1	1	1	1	1	1	1	1	1	1	1
1046428	14	76864036	0.167	0.078	0	0.033	GSTZ1	glutathione transferase zeta 1 (maleylacetoacetate isomerase)	Nonsynon	0.75	Special	0	3	3.78	0	0	0	0	1	1	1	1	1	1	1	0	0	1	1	0	0	1	1	1	1	1	1	1	1	1	1	1	1	1	1	1	1	1	1
1390938	8	20080993	0.25	0.222	0.273	0.033	SLC18A1	solute carrier family 18 (vesicular monoamine), member 1	Nonsynon	0.75	Special	0	3	3.78	0	0	1	1	1	1	1	1	1	1	1	1	1	1	1	1	1	1	1	1	1	1	1	1	1	1	1	1	1	1	1	1	1	1	1
1799971	6	154402490	0.167	0.356	0.489	0	OPRM1	opioid receptor, mu 1	Nonsynon	0.75	The Opioid System	0	3	3.78	1	1	0	0	1	1	1	1	1	0	1	1	0	0	1	1	0	1	1	1	1	1	1	1	1	1	1	1	1	1	1	1	1	1	1
1799972	6	154402389	.	.	.	.	OPRM1	opioid receptor, mu 1	Nonsynon	0.75	The Opioid System	0	3	3.78	1	1	0	0	0	0	0	0	0	0	0	0	0	0	0	0	0	0	0	0	0	0	0	0	0	0	0	0	0	0	0	0	0	0	0
2270637	8	20081107	0.233	0.2	0.244	0.246	SLC18A1	solute carrier family 18 (vesicular monoamine), member 1	Nonsynon	0.75	Special	0	3	3.78	0	0	1	1	0	0	1	0	0	1	1	1	1	1	1	1	1	1	1	1	1	1	1	1	1	1	1	1	1	1	1	1	1	1	1
2276724	3	127337099	0.119	0.211	0.244	0.133	ALDH1L1	aldehyde dehydrogenase 1 family, member L1	Nonsynon	0.75	The Alcohol System	0	3	3.78	0	0	0	0	1	1	1	1	1	1	1	1	1	1	1	1	1	1	1	1	1	1	1	1	1	1	1	1	1	1	1	1	1	1	1
6558703	8	2897427	0	0	0	0.051	CSMD1	CUB and Sushi multiple domains 1	Nonsynon	0.75	Special	0	3	3.78	0	0	0	0	0	0	0	0	1	0	0	0	0	0	0	0	0	0	0	0	0	0	0	0	0	0	0	0	0	0	0	0	1	1	1
6912029	6	154402201	0.05	0.133	0.056	0.167	OPRM1	opioid receptor, mu 1	Nonsynon	0.75	The Opioid System	0	3	3.78	1	0	0	0	1	1	1	1	1	0	0	0	0	1	1	1	0	1	1	1	1	1	1	1	1	1	1	1	1	1	1	1	1	1	1
9282815	6	154402335	.	.	.	.	OPRM1	opioid receptor, mu 1	Nonsynon	0.75	The Opioid System	0	3	3.78	1	0	0	0	0	0	0	0	0	0	0	0	0	0	0	0	0	0	0	0	0	0	0	0	0	0	0	0	0	0	0	0	0	0	0
9282817	6	154402560	.	.	.	.	OPRM1	opioid receptor, mu 1	Nonsynon	0.75	The Opioid System	0	3	3.78	1	0	0	0	0	0	0	0	0	0	0	0	0	0	0	0	0	0	0	0	0	0	0	0	0	0	0	0	0	0	0	0	0	0	0
9282819	6	154402569	0	0	0	0	OPRM1	opioid receptor, mu 1	Nonsynon	0.75	The Opioid System	0	3	3.78	1	0	0	0	0	0	0	0	0	0	0	0	0	0	0	0	0	0	0	0	0	0	0	0	0	0	0	0	0	0	0	0	0	0	0
9460608	6	21309387	0	0	0	0.008	CDKAL1	CDK5 regulatory subunit associated protein 1-like 1	Nonsynon	0.75	Special	0	3	3.78	0	0	0	0	0	0	0	0	1	0	0	0	0	0	0	0	0	0	0	0	0	0	0	0	0	0	0	0	0	0	0	0	0	1	1
13088615	3	127359960	.	.	.	.	ALDH1L1	aldehyde dehydrogenase 1 family, member L1	Nonsynon	0.75	The Alcohol System	0	3	3.78	0	0	0	0	0	0	0	0	0	0	0	0	0	0	0	0	0	0	0	0	0	0	0	0	0	0	0	0	0	0	0	0	0	0	0
17092104	8	20049834	0.083	0.044	0.033	0	SLC18A1	solute carrier family 18 (vesicular monoamine), member 1	Nonsynon	0.75	Special	0	3	3.78	0	0	1	1	0	0	0	0	1	1	1	1	1	1	1	1	1	1	0	0	0	1	0	0	0	1	0	0	0	1	0	0	0	1	1
17174636	6	154402211	.	.	.	.	OPRM1	opioid receptor, mu 1	Nonsynon	0.75	The Opioid System	0	3	3.78	1	0	0	0	0	0	0	0	0	0	0	0	0	0	0	0	0	0	0	0	0	0	0	0	0	0	0	0	0	0	0	0	0	0	0
17174638	6	154402262	.	.	.	.	OPRM1	opioid receptor, mu 1	Nonsynon	0.75	The Opioid System	0	3	3.78	1	0	0	0	0	0	0	0	0	0	0	0	0	0	0	0	0	0	0	0	0	0	0	0	0	0	0	0	0	0	0	0	0	0	0
17215808	8	20080982	0	0	0	0	SLC18A1	solute carrier family 18 (vesicular monoamine), member 1	Nonsynon	0.75	Special	0	3	3.78	0	0	0	0	0	0	0	0	1	0	0	0	0	0	0	0	0	0	0	0	0	0	0	0	0	0	0	0	0	0	0	0	0	1	1
17215822	8	20081155	.	.	.	.	SLC18A1	solute carrier family 18 (vesicular monoamine), member 1	Nonsynon	0.75	Special	0	3	3.78	0	0	0	0	0	0	0	0	0	0	0	0	0	0	0	0	0	0	0	0	0	0	0	0	0	0	0	0	0	0	0	0	0	0	0
34395765	8	3046560	.	.	.	.	CSMD1	CUB and Sushi multiple domains 1	Nonsynon	0.75	Special	0	3	3.78	0	0	0	0	0	0	0	0	0	0	0	0	0	0	0	0	0	0	0	0	0	0	0	0	0	0	0	0	0	0	0	0	0	0	0
35071327	8	2897482	.	.	.	.	CSMD1	CUB and Sushi multiple domains 1	Nonsynon	0.75	Special	0	3	3.78	0	0	0	0	0	0	0	0	0	0	0	0	0	0	0	0	0	0	0	0	0	0	0	0	0	0	0	0	0	0	0	0	0	0	0
35098282	8	2897413	.	.	.	.	CSMD1	CUB and Sushi multiple domains 1	Nonsynon	0.75	Special	0	3	3.78	0	0	0	0	0	0	0	0	0	0	0	0	0	0	0	0	0	0	0	0	0	0	0	0	0	0	0	0	0	0	0	0	0	0	0
35515847	8	2808302	.	.	.	.	CSMD1	CUB and Sushi multiple domains 1	Nonsynon	0.75	Special	0	3	3.78	0	0	0	0	0	0	0	0	0	0	0	0	0	0	0	0	0	0	0	0	0	0	0	0	0	0	0	0	0	0	0	0	0	0	0
45520936	8	20081149	.	.	.	.	SLC18A1	solute carrier family 18 (vesicular monoamine), member 1	Nonsynon	0.75	Special	0	3	3.78	0	0	0	0	0	0	0	0	0	0	0	0	0	0	0	0	0	0	0	0	0	0	0	0	0	0	0	0	0	0	0	0	0	0	0
45575733	8	20081099	.	.	.	.	SLC18A1	solute carrier family 18 (vesicular monoamine), member 1	Nonsynon	0.75	Special	0	3	3.78	0	0	0	0	0	0	0	0	0	0	0	0	0	0	0	0	0	0	0	0	0	0	0	0	0	0	0	0	0	0	0	0	0	0	0
45604334	8	20081179	.	.	.	.	SLC18A1	solute carrier family 18 (vesicular monoamine), member 1	Nonsynon	0.75	Special	0	3	3.78	0	0	0	0	0	0	0	0	0	0	0	0	0	0	0	0	0	0	0	0	0	0	0	0	0	0	0	0	0	0	0	0	0	0	0
7972	14	76862990	0.083	0	0	0	GSTZ1	glutathione transferase zeta 1 (maleylacetoacetate isomerase)	Nonsynon	0.74	Special	0	3	3.77	0	0	0	0	1	1	1	1	1	0	0	0	0	0	0	0	0	1	1	1	1	1	1	1	1	1	1	1	1	1	1	1	1	1	1
2270641	8	20082746	0.367	0.267	0.341	0.108	SLC18A1	solute carrier family 18 (vesicular monoamine), member 1	Nonsynon	0.74	Special	0	3	3.77	0	0	0	1	0	0	0	0	0	1	0	0	1	1	1	1	1	1	0	0	1	1	0	0	1	1	0	0	1	1	0	0	1	1	0
3177427	14	76862960	0.267	0.489	0.489	0.317	GSTZ1	glutathione transferase zeta 1 (maleylacetoacetate isomerase)	Nonsynon	0.74	Special	0	3	3.77	0	0	1	1	1	1	1	1	1	1	1	1	1	1	1	1	1	1	1	1	1	1	1	1	1	1	1	1	1	1	1	1	1	1	1
5846840	3	14536631	.	.	.	.	GRIP2	glutamate receptor interacting protein 2	Nonsynon	0.74	The Glutamatergic System	0	3	3.77	0	0	0	0	0	0	0	0	0	0	0	0	0	0	0	0	0	0	0	0	0	0	0	0	0	0	0	0	0	0	0	0	0	0	0
6504459	17	62213543	0.017	0	0	0	PRKCA	protein kinase C, alpha	Nonsynon	0.74	Special	0	3	3.77	0	0	0	0	0	0	0	0	1	0	0	0	0	0	0	0	0	0	0	0	0	0	0	0	0	0	0	0	0	0	0	0	0	1	1
12968145	18	53862933	.	.	.	.	NEDD4L	neural precursor cell expressed, developmentally down-regulated 4-like	Nonsynon	0.74	Special	0	3	3.77	0	0	0	0	0	0	0	0	0	0	0	0	0	0	0	0	0	0	0	0	0	0	0	0	0	0	0	0	0	0	0	0	0	0	0
17092144	8	20082724	0	0	0	0	SLC18A1	solute carrier family 18 (vesicular monoamine), member 1	Nonsynon	0.74	Special	0	3	3.77	0	0	0	0	0	0	0	0	1	0	0	0	0	0	0	0	0	0	0	0	0	0	0	0	0	0	0	0	0	0	0	0	0	1	1
33939411	3	14536632	.	.	.	.	GRIP2	glutamate receptor interacting protein 2	Nonsynon	0.74	The Glutamatergic System	0	3	3.77	0	0	0	0	0	0	0	0	0	0	0	0	0	0	0	0	0	0	0	0	0	0	0	0	0	0	0	0	0	0	0	0	0	0	0
34133255	17	62213485	.	.	.	.	PRKCA	protein kinase C, alpha	Nonsynon	0.74	Special	0	3	3.77	0	0	0	0	0	0	0	0	0	0	0	0	0	0	0	0	0	0	0	0	0	0	0	0	0	0	0	0	0	0	0	0	0	0	0
35276120	17	62213519	.	.	.	.	PRKCA	protein kinase C, alpha	Nonsynon	0.74	Special	0	3	3.77	0	0	0	0	0	0	0	0	0	0	0	0	0	0	0	0	0	0	0	0	0	0	0	0	0	0	0	0	0	0	0	0	0	0	0
45531234	8	20080281	.	.	.	.	SLC18A1	solute carrier family 18 (vesicular monoamine), member 1	Nonsynon	0.74	Special	0	3	3.77	0	0	0	0	0	0	0	0	0	0	0	0	0	0	0	0	0	0	0	0	0	0	0	0	0	0	0	0	0	0	0	0	0	0	0
898513	8	2955164	0.008	0	0	0.142	CSMD1	CUB and Sushi multiple domains 1	Nonsynon	0.73	Special	0	3	3.77	0	0	0	0	0	0	0	0	1	0	0	0	0	0	0	0	1	0	0	0	0	0	0	0	1	0	0	0	1	0	0	0	1	1	1
1048748	22	20473038	.	.	.	.	MAPK1	mitogen-activated protein kinase 1	Synon	0.73	Special	1	23	3.77	0	0	0	0	0	0	0	0	0	0	0	0	0	0	0	0	0	0	0	0	0	0	0	0	0	0	0	0	0	0	0	0	0	0	0
1130164	22	20472993	.	.	.	.	MAPK1	mitogen-activated protein kinase 1	Synon	0.73	Special	1	23	3.77	0	0	0	0	0	0	0	0	0	0	0	0	0	0	0	0	0	0	0	0	0	0	0	0	0	0	0	0	0	0	0	0	0	0	0
1133082	5	76285192	.	.	.	.	CRHBP	corticotropin releasing hormone binding protein	Nonsynon	0.73	Special	0	3	3.77	0	0	0	0	0	0	0	0	0	0	0	0	0	0	0	0	0	0	0	0	0	0	0	0	0	0	0	0	0	0	0	0	0	0	0
1135597	6	29708079	.	.	.	.	GABBR1	gamma-aminobutyric acid (GABA) B receptor, 1	Nonsynon	0.73	The GABA System	0	3	3.77	0	0	0	0	0	0	0	0	0	0	0	0	0	0	0	0	0	0	0	0	0	0	0	0	0	0	0	0	0	0	0	0	0	0	0
2161752	8	3188284	0.088	0.062	0.11	0.094	CSMD1	CUB and Sushi multiple domains 1	Nonsynon	0.73	Special	0	3	3.77	0	0	0	0	0	0	0	0	0	0	0	0	0	0	0	0	0	0	0	0	0	1	1	1	0	1	1	1	0	1	1	1	0	1	1
4876056	8	2807450	0.052	0.089	0.045	0.373	CSMD1	CUB and Sushi multiple domains 1	Nonsynon	0.73	Special	0	3	3.77	0	0	0	0	0	0	0	0	1	0	0	0	0	0	0	0	0	0	0	0	0	0	0	0	0	0	0	0	0	0	0	0	0	1	1
6995799	8	2987515	0	0.011	0	0.05	CSMD1	CUB and Sushi multiple domains 1	Nonsynon	0.73	Special	0	3	3.77	0	0	0	0	0	0	0	0	0	0	0	0	0	0	0	0	0	0	0	0	0	0	0	0	0	0	0	0	0	0	0	0	0	0	0
7015423	8	2987440	0	0	0	0.267	CSMD1	CUB and Sushi multiple domains 1	Nonsynon	0.73	Special	0	3	3.77	0	0	1	1	0	0	0	0	1	1	1	1	1	1	1	1	1	0	0	0	0	0	0	0	0	0	0	0	0	0	0	0	0	1	1
9282691	3	127338355	0	0	0	0.353	ALDH1L1	aldehyde dehydrogenase 1 family, member L1	Nonsynon	0.73	The Alcohol System	0	3	3.77	0	0	0	0	0	0	0	0	0	0	0	0	0	0	0	0	0	0	0	0	0	0	0	0	0	0	0	0	1	0	0	0	0	0	0
9282692	3	127338335	.	.	.	.	ALDH1L1	aldehyde dehydrogenase 1 family, member L1	Nonsynon	0.73	The Alcohol System	0	3	3.77	0	0	0	0	0	0	0	0	0	0	0	0	0	0	0	0	0	0	0	0	0	0	0	0	0	0	0	0	0	0	0	0	0	0	0
9282693	3	127338334	.	.	.	.	ALDH1L1	aldehyde dehydrogenase 1 family, member L1	Nonsynon	0.73	The Alcohol System	0	3	3.77	0	0	0	0	0	0	0	0	0	0	0	0	0	0	0	0	0	0	0	0	0	0	0	0	0	0	0	0	0	0	0	0	0	0	0
9282697	3	127338298	.	.	.	.	ALDH1L1	aldehyde dehydrogenase 1 family, member L1	Nonsynon	0.73	The Alcohol System	0	3	3.77	0	0	0	0	0	0	0	0	0	0	0	0	0	0	0	0	0	0	0	0	0	0	0	0	0	0	0	0	0	0	0	0	0	0	0
17855418	8	11747583	.	.	.	.	CTSB	cathepsin B	Nonsynon	0.73	Special	0	3	3.77	0	0	0	0	0	0	0	0	0	0	0	0	0	0	0	0	0	0	0	0	0	0	0	0	0	0	0	0	0	0	0	0	0	0	0
34469602	19	17946985	.	.	.	.	KCNN1	potassium intermediate/small conductance calcium-activated channel, subfamily N, member 1	Nonsynon	0.73	Special	0	3	3.77	0	0	0	0	0	0	0	0	0	0	0	0	0	0	0	0	0	0	0	0	0	0	0	0	0	0	0	0	0	0	0	0	0	0	0
34577499	3	10840044	.	.	.	.	SLC6A11	solute carrier family 6 (neurotransmitter transporter, GABA), member 11	Nonsynon	0.73	The GABA System	0	3	3.77	0	0	0	0	0	0	0	0	0	0	0	0	0	0	0	0	0	0	0	0	0	0	0	0	0	0	0	0	0	0	0	0	0	0	0
35043129	8	2795190	.	.	.	.	CSMD1	CUB and Sushi multiple domains 1	Nonsynon	0.73	Special	0	3	3.77	0	0	0	0	0	0	0	0	0	0	0	0	0	0	0	0	0	0	0	0	0	0	0	0	0	0	0	0	0	0	0	0	0	0	0
35444669	8	3007151	.	.	.	.	CSMD1	CUB and Sushi multiple domains 1	Nonsynon	0.73	Special	0	3	3.77	0	0	0	0	0	0	0	0	0	0	0	0	0	0	0	0	0	0	0	0	0	0	0	0	0	0	0	0	0	0	0	0	0	0	0
35621323	8	26548248	.	.	.	.	DPYSL2	dihydropyrimidinase-like 2	Synon	0.73	Special	1	10	3.77	0	0	0	0	0	0	0	0	0	0	0	0	0	0	0	0	0	0	0	0	0	0	0	0	0	0	0	0	0	0	0	0	0	0	0
1127717	3	127308749	.	.	.	.	ALDH1L1	aldehyde dehydrogenase 1 family, member L1	Nonsynon	0.72	The Alcohol System	0	3	3.76	0	0	0	0	0	0	0	0	0	0	0	0	0	0	0	0	0	0	0	0	0	0	0	0	0	0	0	0	0	0	0	0	0	0	0
2234955	14	76865273	0	0.012	0	0	GSTZ1	glutathione transferase zeta 1 (maleylacetoacetate isomerase)	Nonsynon	0.72	Special	0	3	3.76	0	0	0	0	0	0	0	0	1	0	0	0	0	0	0	0	0	0	0	0	0	0	0	0	0	0	0	0	0	0	0	0	0	1	1
4646749	3	127308747	.	.	.	.	ALDH1L1	aldehyde dehydrogenase 1 family, member L1	Nonsynon	0.72	The Alcohol System	0	3	3.76	0	0	0	0	0	0	0	0	0	0	0	0	0	0	0	0	0	0	0	0	0	0	0	0	0	0	0	0	0	0	0	0	0	0	0
4646750	3	127308693	0.058	0.011	0.045	0.093	ALDH1L1	aldehyde dehydrogenase 1 family, member L1	Nonsynon	0.72	The Alcohol System	0	3	3.76	0	0	0	1	1	1	1	1	1	0	0	0	0	1	1	1	1	1	1	1	1	1	1	1	1	1	1	1	1	1	1	1	1	1	1
5846531	3	7707727	.	.	.	.	GRM7	glutamate receptor, metabotropic 7	Nonsynon	0.72	The Glutamatergic System	0	3	3.76	0	0	0	0	0	0	0	0	0	0	0	0	0	0	0	0	0	0	0	0	0	0	0	0	0	0	0	0	0	0	0	0	0	0	0
9282689	3	127308720	0	0	0	0	ALDH1L1	aldehyde dehydrogenase 1 family, member L1	Nonsynon	0.72	The Alcohol System	0	3	3.76	0	0	0	0	0	0	0	0	0	0	0	0	0	0	0	0	0	0	0	0	0	0	0	0	0	0	0	0	0	0	0	0	0	0	0
11548596	8	11745839	0	0	0	0.009	CTSB	cathepsin B	Nonsynon	0.72	Special	0	3	3.76	0	0	0	0	0	0	0	0	0	0	0	0	0	0	0	0	0	0	0	0	0	0	0	0	0	0	0	0	0	0	0	0	0	0	0
35791563	6	21339097	.	.	.	.	CDKAL1	CDK5 regulatory subunit associated protein 1-like 1	Nonsynon	0.72	Special	0	3	3.76	0	0	0	0	0	0	0	0	0	0	0	0	0	0	0	0	0	0	0	0	0	0	0	0	0	0	0	0	0	0	0	0	0	0	0
1800035	10	112828542	.	.	.	.	ADRA2A	adrenergic, alpha-2A-, receptor	Nonsynon	0.92	The Adrenergic System	0	2	3.76	0	0	0	0	0	0	0	0	0	0	0	0	0	0	0	0	0	0	0	0	0	0	0	0	0	0	0	0	0	0	0	0	0	0	0
1801252	10	115794026	.	0	0	0.008	ADRB1	adrenergic, beta-1-, receptor	Nonsynon	0.92	The Adrenergic System	0	2	3.76	0	0	0	0	0	0	0	0	0	0	0	0	0	0	0	0	0	0	0	0	0	0	0	0	0	0	0	0	0	0	0	0	0	0	0
34844626	10	115793958	.	.	.	.	ADRB1	adrenergic, beta-1-, receptor	Nonsynon	0.92	The Adrenergic System	0	2	3.76	0	0	0	0	0	0	0	0	0	0	0	0	0	0	0	0	0	0	0	0	0	0	0	0	0	0	0	0	0	0	0	0	0	0	0
35230616	10	115793973	.	.	.	.	ADRB1	adrenergic, beta-1-, receptor	Nonsynon	0.92	The Adrenergic System	0	2	3.76	0	0	0	0	0	0	0	0	0	0	0	0	0	0	0	0	0	0	0	0	0	0	0	0	0	0	0	0	0	0	0	0	0	0	0
35720093	10	115793966	.	.	.	.	ADRB1	adrenergic, beta-1-, receptor	Nonsynon	0.92	The Adrenergic System	0	2	3.76	0	0	0	0	0	0	0	0	0	0	0	0	0	0	0	0	0	0	0	0	0	0	0	0	0	0	0	0	0	0	0	0	0	0	0
17573	8	11742059	0	0	0	0.167	CTSB	cathepsin B	Nonsynon	0.71	Special	0	3	3.75	0	0	0	0	0	0	0	1	1	0	0	0	0	0	0	0	0	0	0	0	0	0	0	0	0	0	0	0	0	1	1	1	1	1	1
2886059	3	127348456	0.125	0.211	0.25	0.492	ALDH1L1	aldehyde dehydrogenase 1 family, member L1	Nonsynon	0.71	The Alcohol System	0	3	3.75	0	0	0	1	0	0	0	0	1	1	1	1	1	1	1	1	1	1	1	1	0	1	1	1	1	1	1	1	1	1	1	1	1	1	1
34387346	6	36149837	.	.	.	.	MAPK14	mitogen-activated protein kinase 14	Nonsynon	0.71	Goldman Gene	0	3	3.75	0	0	0	0	0	0	0	0	0	0	0	0	0	0	0	0	0	0	0	0	0	0	0	0	0	0	0	0	0	0	0	0	0	0	0
12338	8	11748297	0.304	0.476	0.488	0.373	CTSB	cathepsin B	Nonsynon	0.7	Special	0	3	3.74	0	0	0	0	0	0	0	0	0	1	1	1	0	1	1	1	0	0	1	1	0	1	1	1	0	1	1	1	0	1	1	1	0	1	1
17316876	3	14542386	0	0.067	0.022	0.008	GRIP2	glutamate receptor interacting protein 2	Nonsynon	0.7	The Glutamatergic System	0	3	3.74	0	0	0	1	0	0	0	0	1	0	0	0	0	1	1	1	1	0	0	0	0	0	0	0	0	0	0	0	0	0	0	0	0	1	1
17852513	1	20837159	.	.	.	.	PINK1	PTEN induced putative kinase 1	Nonsynon	0.7	Special	0	3	3.74	0	0	0	0	0	0	0	0	0	0	0	0	0	0	0	0	0	0	0	0	0	0	0	0	0	0	0	0	0	0	0	0	0	0	0
28605689	8	11748296	.	.	.	.	CTSB	cathepsin B	Nonsynon	0.7	Special	0	3	3.74	0	0	0	0	0	0	0	0	0	0	0	0	0	0	0	0	0	0	0	0	0	0	0	0	0	0	0	0	0	0	0	0	0	0	0
34677717	1	20837160	.	.	.	.	PINK1	PTEN induced putative kinase 1	Nonsynon	0.7	Special	0	3	3.74	0	0	0	0	0	0	0	0	0	0	0	0	0	0	0	0	0	0	0	0	0	0	0	0	0	0	0	0	0	0	0	0	0	0	0
35802484	1	20837120	.	.	.	.	PINK1	PTEN induced putative kinase 1	Nonsynon	0.7	Special	0	3	3.74	0	0	0	0	0	0	0	0	0	0	0	0	0	0	0	0	0	0	0	0	0	0	0	0	0	0	0	0	0	0	0	0	0	0	0
45604240	1	20836968	.	.	.	.	PINK1	PTEN induced putative kinase 1	Nonsynon	0.7	Special	0	3	3.74	0	0	0	0	0	0	0	0	0	0	0	0	0	0	0	0	0	0	0	0	0	0	0	0	0	0	0	0	0	0	0	0	0	0	0
45608139	1	20836988	.	.	.	.	PINK1	PTEN induced putative kinase 1	Nonsynon	0.7	Special	0	3	3.74	0	0	0	0	0	0	0	0	0	0	0	0	0	0	0	0	0	0	0	0	0	0	0	0	0	0	0	0	0	0	0	0	0	0	0
2266782	1	169343590	0.383	0.189	0.205	0.458	FMO3	flavin containing monooxygenase 3	Nonsynon	0.9	The Nicotine Metabolism System	0	2	3.74	1	0	0	0	1	1	1	1	1	0	0	1	0	1	1	1	1	1	1	1	1	1	1	1	1	1	1	1	1	1	1	1	1	1	1
12072582	1	169343512	0	0	0	0.136	FMO3	flavin containing monooxygenase 3	Nonsynon	0.9	The Nicotine Metabolism System	0	2	3.74	1	0	0	0	0	0	1	0	0	0	0	0	1	0	0	0	1	0	0	0	0	0	0	0	0	1	1	1	1	0	0	0	0	0	0
9465882	6	20866829	0	0	0	0	CDKAL1	CDK5 regulatory subunit associated protein 1-like 1	Nonsynon	0.69	Special	0	3	3.74	0	0	0	0	0	0	0	0	1	0	0	0	0	0	0	0	0	0	0	0	0	0	0	0	0	0	0	0	0	0	0	0	0	1	1
34203620	1	20847591	.	.	.	.	PINK1	PTEN induced putative kinase 1	Nonsynon	0.69	Special	0	3	3.74	0	0	0	0	0	0	0	0	0	0	0	0	0	0	0	0	0	0	0	0	0	0	0	0	0	0	0	0	0	0	0	0	0	0	0
35186799	19	10777632	.	.	.	.	DNM2	dynamin 2	Nonsynon	0.69	Special	0	3	3.74	0	0	0	0	0	0	0	0	0	0	0	0	0	0	0	0	0	0	0	0	0	0	0	0	0	0	0	0	0	0	0	0	0	0	0
45478900	1	20847692	.	.	.	.	PINK1	PTEN induced putative kinase 1	Nonsynon	0.69	Special	0	3	3.74	0	0	0	0	0	0	0	0	0	0	0	0	0	0	0	0	0	0	0	0	0	0	0	0	0	0	0	0	0	0	0	0	0	0	0
45515602	1	20847608	.	.	.	.	PINK1	PTEN induced putative kinase 1	Nonsynon	0.69	Special	0	3	3.74	0	0	0	0	0	0	0	0	0	0	0	0	0	0	0	0	0	0	0	0	0	0	0	0	0	0	0	0	0	0	0	0	0	0	0
3824271	8	2952651	0.208	0.011	0.045	0.258	CSMD1	CUB and Sushi multiple domains 1	Nonsynon	0.68	Special	0	3	3.73	0	0	0	1	1	1	1	1	1	1	0	0	0	1	1	1	1	1	1	1	1	1	1	1	1	1	1	1	1	1	1	1	1	1	1
34833863	8	3044665	.	.	.	.	CSMD1	CUB and Sushi multiple domains 1	Nonsynon	0.68	Special	0	3	3.73	0	0	0	0	0	0	0	0	0	0	0	0	0	0	0	0	0	0	0	0	0	0	0	0	0	0	0	0	0	0	0	0	0	0	0
41301819	4	46085435	.	.	.	.	GABRA2	gamma-aminobutyric acid (GABA) A receptor, alpha 2	Nonsynon	0.68	The GABA System	0	3	3.73	0	0	0	0	0	0	0	0	0	0	0	0	0	0	0	0	0	0	0	0	0	0	0	0	0	0	0	0	0	0	0	0	0	0	0
4369876	2	166837502	0.009	0.068	0.058	0	SCN9A	sodium channel, voltage-gated, type IX, alpha subunit	Nonsynon	0.89	Special	0	2	3.73	0	0	0	0	0	0	0	0	0	0	1	0	0	0	1	1	0	0	1	0	0	0	1	1	0	0	1	1	0	0	1	1	0	0	1
34345596	2	166837519	.	.	.	.	SCN9A	sodium channel, voltage-gated, type IX, alpha subunit	Nonsynon	0.89	Special	0	2	3.73	0	0	0	0	0	0	0	0	0	0	0	0	0	0	0	0	0	0	0	0	0	0	0	0	0	0	0	0	0	0	0	0	0	0	0
35797497	2	166837301	.	.	.	.	SCN9A	sodium channel, voltage-gated, type IX, alpha subunit	Nonsynon	0.89	Special	0	2	3.73	0	0	0	0	0	0	0	0	0	0	0	0	0	0	0	0	0	0	0	0	0	0	0	0	0	0	0	0	0	0	0	0	0	0	0
41268673	2	166849355	.	.	.	.	SCN9A	sodium channel, voltage-gated, type IX, alpha subunit	Nonsynon	0.89	Special	0	2	3.73	0	0	0	0	0	0	0	0	0	0	0	0	0	0	0	0	0	0	0	0	0	0	0	0	0	0	0	0	0	0	0	0	0	0	0
171170	10	115795080	.	.	.	.	ADRB1	adrenergic, beta-1-, receptor	Nonsynon	0.88	The Adrenergic System	0	2	3.72	0	0	0	0	0	0	0	0	0	0	0	0	0	0	0	0	0	0	0	0	0	0	0	0	0	0	0	0	0	0	0	0	0	0	0
180897	10	115794908	0	0	0	0	ADRB1	adrenergic, beta-1-, receptor	Nonsynon	0.88	The Adrenergic System	0	2	3.72	0	0	0	0	0	0	0	0	1	0	0	0	0	0	0	0	0	0	0	0	0	0	0	0	0	0	0	0	0	0	0	0	0	1	1
189429	10	115794937	.	.	.	.	ADRB1	adrenergic, beta-1-, receptor	Nonsynon	0.88	The Adrenergic System	0	2	3.72	0	0	0	0	0	0	0	0	0	0	0	0	0	0	0	0	0	0	0	0	0	0	0	0	0	0	0	0	0	0	0	0	0	0	0
238740	10	115795261	.	.	.	.	ADRB1	adrenergic, beta-1-, receptor	Nonsynon	0.88	The Adrenergic System	0	2	3.72	0	0	0	0	0	0	0	0	0	0	0	0	0	0	0	0	0	0	0	0	0	0	0	0	0	0	0	0	0	0	0	0	0	0	0
238741	10	115794833	.	.	.	.	ADRB1	adrenergic, beta-1-, receptor	Nonsynon	0.88	The Adrenergic System	0	2	3.72	0	0	0	0	0	0	0	0	0	0	0	0	0	0	0	0	0	0	0	0	0	0	0	0	0	0	0	0	0	0	0	0	0	0	0
622397	10	115794852	.	.	.	.	ADRB1	adrenergic, beta-1-, receptor	Nonsynon	0.88	The Adrenergic System	0	2	3.72	0	0	0	0	0	0	0	0	0	0	0	0	0	0	0	0	0	0	0	0	0	0	0	0	0	0	0	0	0	0	0	0	0	0	0
1054202	10	70822039	.	.	.	.	HK1	hexokinase 1	Nonsynon	0.88	Special	0	2	3.72	0	0	0	0	0	0	0	0	0	0	0	0	0	0	0	0	0	0	0	0	0	0	0	0	0	0	0	0	0	0	0	0	0	0	0
1801253	10	115795046	0.317	0.25	0.151	0.408	ADRB1	adrenergic, beta-1-, receptor	Nonsynon	0.88	The Adrenergic System	0	2	3.72	0	0	0	0	0	0	0	0	0	0	0	0	0	1	1	1	0	1	1	1	0	1	1	1	0	1	1	1	0	1	1	1	0	1	1
3750904	2	166763639	0.008	0.1	0.102	0	SCN9A	sodium channel, voltage-gated, type IX, alpha subunit	Nonsynon	0.88	Special	0	2	3.72	0	0	0	0	0	0	0	0	0	0	1	1	0	0	1	1	0	0	0	0	0	0	1	1	0	0	1	1	0	0	1	1	0	0	1
4148254	4	115764162	0.042	0.167	0.102	0	UGT8	UDP glycosyltransferase 8 (UDP-galactose ceramide galactosyltransferase)	Nonsynon	0.88	The Nicotine Metabolism System	0	2	3.72	0	0	0	1	0	0	0	0	1	0	0	0	0	1	1	1	1	0	0	0	0	0	0	1	0	0	0	1	0	0	0	1	0	1	1
8192448	5	159276642	.	.	.	.	ADRA1B	adrenergic, alpha-1B-, receptor	Nonsynon	0.88	The Adrenergic System	0	2	3.72	0	0	0	0	0	0	0	0	0	0	0	0	0	0	0	0	0	0	0	0	0	0	0	0	0	0	0	0	0	0	0	0	0	0	0
12478318	2	166841786	0.009	0.061	0.061	0	SCN9A	sodium channel, voltage-gated, type IX, alpha subunit	Nonsynon	0.88	Special	0	2	3.72	0	0	0	1	0	0	0	0	1	0	1	0	0	1	1	1	1	0	1	0	0	0	1	0	0	0	1	0	0	0	1	0	0	1	1
17875445	10	115795047	.	.	.	.	ADRB1	adrenergic, beta-1-, receptor	Nonsynon	0.88	The Adrenergic System	0	2	3.72	0	0	0	0	0	0	0	0	0	0	0	0	0	0	0	0	0	0	0	0	0	0	0	0	0	0	0	0	0	0	0	0	0	0	0
34747241	10	70822027	.	.	.	.	HK1	hexokinase 1	Nonsynon	0.88	Special	0	2	3.72	0	0	0	0	0	0	0	0	0	0	0	0	0	0	0	0	0	0	0	0	0	0	0	0	0	0	0	0	0	0	0	0	0	0	0
35705839	10	115795094	.	.	.	.	ADRB1	adrenergic, beta-1-, receptor	Nonsynon	0.88	The Adrenergic System	0	2	3.72	0	0	0	0	0	0	0	0	0	0	0	0	0	0	0	0	0	0	0	0	0	0	0	0	0	0	0	0	0	0	0	0	0	0	0
36052953	10	115795077	.	.	.	.	ADRB1	adrenergic, beta-1-, receptor	Nonsynon	0.88	The Adrenergic System	0	2	3.72	0	0	0	0	0	0	0	0	0	0	0	0	0	0	0	0	0	0	0	0	0	0	0	0	0	0	0	0	0	0	0	0	0	0	0
362936	6	146762519	0.033	0	0	0	GRM1	glutamate receptor, metabotropic 1	Nonsynon	0.87	The Glutamatergic System	0	2	3.71	0	1	0	0	0	0	0	0	1	0	0	0	0	0	0	0	0	0	0	0	0	0	0	0	0	0	0	0	0	0	0	0	0	1	1
1047005	6	146761645	0	0	0.012	0	GRM1	glutamate receptor, metabotropic 1	Nonsynon	0.87	The Glutamatergic System	0	2	3.71	0	0	0	0	0	0	0	0	0	0	0	0	0	0	0	0	0	0	0	0	0	0	0	0	0	0	0	0	0	0	0	0	0	0	0
2066530	1	169349773	0	0	0	0.026	FMO3	flavin containing monooxygenase 3	Nonsynon	0.87	The Nicotine Metabolism System	0	2	3.71	1	0	0	0	0	0	1	0	1	0	0	0	0	0	0	0	0	0	0	0	0	0	0	0	0	1	1	1	1	0	0	0	0	1	1
2066532	1	169350027	0	0	0	0.008	FMO3	flavin containing monooxygenase 3	Nonsynon	0.87	The Nicotine Metabolism System	0	2	3.71	1	0	0	0	0	0	1	0	1	0	0	0	0	0	0	0	0	0	0	0	0	0	0	0	0	1	1	1	1	0	0	0	0	1	1
2266780	1	169349866	0.167	0.156	0.178	0.017	FMO3	flavin containing monooxygenase 3	Nonsynon	0.87	The Nicotine Metabolism System	0	2	3.71	1	0	1	1	0	0	1	0	1	1	1	1	1	1	1	1	1	1	1	1	0	1	1	1	0	1	1	1	1	1	1	1	0	1	1
2727306	17	59371934	.	.	.	.	SCN4A	sodium channel, voltage-gated, type IV, alpha subunit	Nonsynon	0.87	Special	0	2	3.71	0	0	0	0	0	0	0	0	0	0	0	0	0	0	0	0	0	0	0	0	0	0	0	0	0	0	0	0	0	0	0	0	0	0	0
3025919	6	146762091	0	0	0	0	GRM1	glutamate receptor, metabotropic 1	Nonsynon	0.87	The Glutamatergic System	0	2	3.71	0	0	0	0	0	0	0	0	0	0	0	0	0	0	0	0	0	0	0	0	0	0	0	0	0	0	0	0	0	0	0	0	0	0	0
28363581	1	169350022	.	.	.	.	FMO3	flavin containing monooxygenase 3	Nonsynon	0.87	The Nicotine Metabolism System	0	2	3.71	1	0	0	0	0	0	0	0	0	0	0	0	0	0	0	0	0	0	0	0	0	0	0	0	0	0	0	0	0	0	0	0	0	0	0
28914834	17	25558878	.	.	.	.	SLC6A4	solute carrier family 6 (neurotransmitter transporter, serotonin), member 4	Nonsynon	0.87	The Serotonergic System	0	2	3.71	1	0	0	0	0	0	0	0	0	0	0	0	0	0	0	0	0	0	0	0	0	0	0	0	0	0	0	0	0	0	0	0	0	0	0
35449363	6	146762520	.	.	.	.	GRM1	glutamate receptor, metabotropic 1	Nonsynon	0.87	The Glutamatergic System	0	2	3.71	0	0	0	0	0	0	0	0	0	0	0	0	0	0	0	0	0	0	0	0	0	0	0	0	0	0	0	0	0	0	0	0	0	0	0
41305288	6	146762053	.	.	.	.	GRM1	glutamate receptor, metabotropic 1	Nonsynon	0.87	The Glutamatergic System	0	2	3.71	0	0	0	0	0	0	0	0	0	0	0	0	0	0	0	0	0	0	0	0	0	0	0	0	0	0	0	0	0	0	0	0	0	0	0
5559	16	54291603	0	0.011	0	0	SLC6A2	solute carrier family 6 (neurotransmitter transporter, noradrenalin), member 2	Nonsynon	0.86	Neurotransmitter Transporters	0	2	3.7	0	1	0	0	0	0	1	0	0	0	0	0	0	0	0	0	0	0	0	0	0	0	0	0	0	1	1	1	1	0	0	0	0	0	0
3730095	16	4105277	.	.	.	.	ADCY9	adenylate cyclase 9	Nonsynon	0.86	Special	0	2	3.7	0	0	0	0	0	0	0	0	0	0	0	0	0	0	0	0	0	0	0	0	0	0	0	0	0	0	0	0	0	0	0	0	0	0	0
3730096	16	4105228	.	.	.	.	ADCY9	adenylate cyclase 9	Nonsynon	0.86	Special	0	2	3.7	0	0	0	0	0	0	0	0	0	0	0	0	0	0	0	0	0	0	0	0	0	0	0	0	0	0	0	0	0	0	0	0	0	0	0
3730098	16	4104988	.	.	.	.	ADCY9	adenylate cyclase 9	Nonsynon	0.86	Special	0	2	3.7	0	0	0	0	0	0	0	0	0	0	0	0	0	0	0	0	0	0	0	0	0	0	0	0	0	0	0	0	0	0	0	0	0	0	0
3743788	16	54291607	0	0.056	0.011	0	SLC6A2	solute carrier family 6 (neurotransmitter transporter, noradrenalin), member 2	Nonsynon	0.86	Neurotransmitter Transporters	0	2	3.7	0	0	0	0	0	0	0	0	0	0	0	0	0	0	0	0	0	0	0	0	0	0	0	0	0	0	0	0	0	0	0	0	0	0	0
34015903	10	70828450	.	.	.	.	HK1	hexokinase 1	Nonsynon	0.86	Special	0	2	3.7	0	0	0	0	0	0	0	0	0	0	0	0	0	0	0	0	0	0	0	0	0	0	0	0	0	0	0	0	0	0	0	0	0	0	0
34432309	16	9770235	.	.	.	.	GRIN2A	glutamate receptor, ionotropic, N-methyl D-aspartate 2A	Nonsynon	0.86	The Glutamatergic System	0	2	3.7	0	0	0	0	0	0	0	0	0	0	0	0	0	0	0	0	0	0	0	0	0	0	0	0	0	0	0	0	0	0	0	0	0	0	0
35898789	16	9939882	.	.	.	.	GRIN2A	glutamate receptor, ionotropic, N-methyl D-aspartate 2A	Nonsynon	0.86	The Glutamatergic System	0	2	3.7	0	0	0	0	0	0	0	0	0	0	0	0	0	0	0	0	0	0	0	0	0	0	0	0	0	0	0	0	0	0	0	0	0	0	0
6190	5	142760530	.	.	.	.	NR3C1	nuclear receptor subfamily 3, group C, member 1 (glucocorticoid receptor)	Nonsynon	0.85	Goldman Gene	0	2	3.69	0	0	0	0	0	0	0	0	0	0	0	0	0	0	0	0	0	0	0	0	0	0	0	0	0	0	0	0	0	0	0	0	0	0	0
6192	5	142760405	.	.	.	.	NR3C1	nuclear receptor subfamily 3, group C, member 1 (glucocorticoid receptor)	Nonsynon	0.85	Goldman Gene	0	2	3.69	0	1	0	0	0	0	0	0	0	0	0	0	0	0	0	0	0	0	0	0	0	0	0	0	0	0	0	0	0	0	0	0	0	0	0
6195	5	142759510	.	.	.	.	NR3C1	nuclear receptor subfamily 3, group C, member 1 (glucocorticoid receptor)	Nonsynon	0.85	Goldman Gene	0	2	3.69	0	0	0	0	0	0	0	0	0	0	0	0	0	0	0	0	0	0	0	0	0	0	0	0	0	0	0	0	0	0	0	0	0	0	0
1054203	10	70824818	0	0	0	0	HK1	hexokinase 1	Nonsynon	0.85	Special	0	2	3.69	0	0	0	0	0	0	0	0	0	0	0	0	0	0	0	0	0	0	0	0	0	0	0	0	0	0	0	0	0	0	0	0	0	0	0
1800034	10	112827863	.	.	.	.	ADRA2A	adrenergic, alpha-2A-, receptor	Nonsynon	0.85	The Adrenergic System	0	2	3.69	0	0	0	0	0	0	0	0	0	0	0	0	0	0	0	0	0	0	0	0	0	0	0	0	0	0	0	0	0	0	0	0	0	0	0
1800443	11	629830	0	0	0	0.1	DRD4	dopamine receptor D4	Nonsynon	0.85	The Dopamine System	0	2	3.69	1	1	0	0	0	0	0	0	1	0	0	0	0	0	0	0	0	0	0	0	0	0	0	0	0	0	0	0	0	0	0	0	0	1	1
1800445	5	142759504	.	.	.	.	NR3C1	nuclear receptor subfamily 3, group C, member 1 (glucocorticoid receptor)	Nonsynon	0.85	Goldman Gene	0	2	3.69	0	0	0	0	0	0	0	0	0	0	0	0	0	0	0	0	0	0	0	0	0	0	0	0	0	0	0	0	0	0	0	0	0	0	0
6746030	2	166807404	0.125	0.057	0.011	0.133	SCN9A	sodium channel, voltage-gated, type IX, alpha subunit	Nonsynon	0.85	Special	0	2	3.69	0	0	1	1	1	1	1	1	1	1	1	1	1	1	1	1	1	1	1	1	1	1	1	1	1	1	1	1	1	1	1	1	1	1	1
13306143	10	112827853	.	.	.	.	ADRA2A	adrenergic, alpha-2A-, receptor	Nonsynon	0.85	The Adrenergic System	0	2	3.69	0	0	0	0	0	0	0	0	0	0	0	0	0	0	0	0	0	0	0	0	0	0	0	0	0	0	0	0	0	0	0	0	0	0	0
34206659	6	17649303	.	.	.	.	CAP2	CAP, adenylate cyclase-associated protein, 2 (yeast)	Nonsynon	0.85	Special	0	2	3.69	0	0	0	0	0	0	0	0	0	0	0	0	0	0	0	0	0	0	0	0	0	0	0	0	0	0	0	0	0	0	0	0	0	0	0
34620829	6	17649287	.	.	.	.	CAP2	CAP, adenylate cyclase-associated protein, 2 (yeast)	Nonsynon	0.85	Special	0	2	3.69	0	0	0	0	0	0	0	0	0	0	0	0	0	0	0	0	0	0	0	0	0	0	0	0	0	0	0	0	0	0	0	0	0	0	0
34793476	14	22142473	.	.	.	.	ABHD4	abhydrolase domain containing 4	Synon	0.85	Special	0	5	3.69	0	0	0	0	0	0	0	0	0	0	0	0	0	0	0	0	0	0	0	0	0	0	0	0	0	0	0	0	0	0	0	0	0	0	0
35127752	14	22142496	.	.	.	.	ABHD4	abhydrolase domain containing 4	Synon	0.85	Special	0	5	3.69	0	0	0	0	0	0	0	0	0	0	0	0	0	0	0	0	0	0	0	0	0	0	0	0	0	0	0	0	0	0	0	0	0	0	0
41268671	2	166842952	.	.	.	.	SCN9A	sodium channel, voltage-gated, type IX, alpha subunit	Nonsynon	0.85	Special	0	2	3.69	0	0	0	0	0	0	0	0	0	0	0	0	0	0	0	0	0	0	0	0	0	0	0	0	0	0	0	0	0	0	0	0	0	0	0
41274114	1	114481833	.	.	.	.	SYT6	synaptotagmin VI	Nonsynon	0.85	Special	0	2	3.69	0	0	0	0	0	0	0	0	0	0	0	0	0	0	0	0	0	0	0	0	0	0	0	0	0	0	0	0	0	0	0	0	0	0	0
6062627	20	62200356	.	.	.	.	OPRL1	opiate receptor-like 1	Nonsynon	0.84	The Opioid System	0	2	3.69	0	0	0	0	0	0	0	0	0	0	0	0	0	0	0	0	0	0	0	0	0	0	0	0	0	0	0	0	0	0	0	0	0	0	0
12190109	6	146392447	0	0	0	0	GRM1	glutamate receptor, metabotropic 1	Nonsynon	0.84	The Glutamatergic System	0	2	3.69	0	0	0	0	0	0	0	0	1	0	0	0	0	0	0	0	0	0	0	0	0	0	0	0	0	0	0	0	0	0	0	0	0	1	1
34559510	6	146392668	.	.	.	.	GRM1	glutamate receptor, metabotropic 1	Nonsynon	0.84	The Glutamatergic System	0	2	3.69	0	0	0	0	0	0	0	0	0	0	0	0	0	0	0	0	0	0	0	0	0	0	0	0	0	0	0	0	0	0	0	0	0	0	0
35554312	17	24987427	.	.	.	.	SSH2	slingshot homolog 2 (Drosophila)	Nonsynon	0.84	Special	0	2	3.69	0	0	0	0	0	0	0	0	0	0	0	0	0	0	0	0	0	0	0	0	0	0	0	0	0	0	0	0	0	0	0	0	0	0	0
4894	22	38247461	.	.	.	0	ATF4	activating transcription factor 4 (tax-responsive enhancer element B67)	Nonsynon	0.83	Special	0	2	3.68	0	0	0	0	0	0	0	0	0	0	0	0	0	0	0	0	0	0	0	0	0	0	0	0	0	0	0	0	0	0	0	0	0	0	0
1063310	5	170171690	0.3	0.244	0.352	0.258	GABRP	gamma-aminobutyric acid (GABA) A receptor, pi	Nonsynon	0.83	The GABA System	0	2	3.68	0	0	0	1	0	0	0	0	1	1	1	1	0	1	1	1	1	1	1	1	0	1	1	1	0	1	1	1	0	1	1	1	0	1	1
1803323	22	38248269	0	0	0	0.075	ATF4	activating transcription factor 4 (tax-responsive enhancer element B67)	Nonsynon	0.83	Special	0	2	3.68	0	0	0	0	0	0	0	0	0	0	0	0	0	0	0	0	0	0	0	0	0	0	0	0	0	0	0	0	0	0	0	0	0	0	0
1803324	22	38248463	0	0	0	0.075	ATF4	activating transcription factor 4 (tax-responsive enhancer element B67)	Nonsynon	0.83	Special	0	2	3.68	0	0	0	0	0	0	0	0	0	0	0	0	0	0	0	0	1	0	0	0	0	0	0	0	0	0	0	0	0	0	0	0	1	0	0
2228181	22	38248098	.	.	.	.	ATF4	activating transcription factor 4 (tax-responsive enhancer element B67)	Nonsynon	0.83	Special	0	2	3.68	0	0	0	0	0	0	0	0	0	0	0	0	0	0	0	0	0	0	0	0	0	0	0	0	0	0	0	0	0	0	0	0	0	0	0
2229125	8	26777805	0	0	0	0	ADRA1A	adrenergic, alpha-1A-, receptor	Nonsynon	0.83	The Adrenergic System	0	2	3.68	0	1	0	0	0	0	0	0	0	0	0	0	0	0	0	0	0	0	0	0	0	0	0	0	0	0	0	0	0	0	0	0	0	0	0
3730287	8	26777665	.	.	.	.	ADRA1A	adrenergic, alpha-1A-, receptor	Nonsynon	0.83	The Adrenergic System	0	2	3.68	0	0	0	0	0	0	0	0	0	0	0	0	0	0	0	0	0	0	0	0	0	0	0	0	0	0	0	0	0	0	0	0	0	0	0
4145046	11	89548873	0	0	0	0	NAALAD2	N-acetylated alpha-linked acidic dipeptidase 2	Nonsynon	0.83	The Glutamatergic System	0	2	3.68	0	0	0	0	0	0	0	0	0	0	0	0	0	0	0	0	0	0	0	0	0	0	0	0	0	0	0	0	0	0	0	0	0	0	0
7760248	6	146522330	0	0	0	0.017	GRM1	glutamate receptor, metabotropic 1	Nonsynon	0.83	The Glutamatergic System	0	2	3.68	0	1	0	0	0	0	0	0	1	0	0	0	0	0	0	0	0	0	0	0	0	0	0	0	0	0	0	0	0	0	0	0	0	1	1
11018879	11	89520252	0.025	0.033	0.045	0.008	NAALAD2	N-acetylated alpha-linked acidic dipeptidase 2	Nonsynon	0.83	The Glutamatergic System	0	2	3.68	0	0	0	0	0	0	0	0	1	0	0	0	0	0	0	0	0	0	0	0	0	0	0	0	0	0	0	0	0	0	0	0	0	1	1
11556099	22	38247807	.	.	.	.	ATF4	activating transcription factor 4 (tax-responsive enhancer element B67)	Nonsynon	0.83	Special	0	2	3.68	0	0	0	0	0	0	0	0	0	0	0	0	0	0	0	0	0	0	0	0	0	0	0	0	0	0	0	0	0	0	0	0	0	0	0
17855441	7	6024014	0	0	0	0	JTV1	-	Nonsynon	0.83	Special	0	2	3.68	0	0	0	0	0	0	0	0	0	0	0	0	0	0	0	0	0	0	0	0	0	0	0	0	0	0	0	0	0	0	0	0	0	0	0
17857148	2	171410466	.	.	.	.	GAD1	glutamate decarboxylase 1 (brain, 67kDa)	Nonsynon	0.83	The Glutamatergic System	0	2	3.68	0	0	0	0	0	0	0	0	0	0	0	0	0	0	0	0	0	0	0	0	0	0	0	0	0	0	0	0	0	0	0	0	0	0	0
17857149	2	171410769	0	0	0	0	GAD1	glutamate decarboxylase 1 (brain, 67kDa)	Nonsynon	0.83	The Glutamatergic System	0	2	3.68	0	0	0	0	0	0	0	0	0	0	0	0	0	0	0	0	0	0	0	0	0	0	0	0	0	0	0	0	0	0	0	0	0	0	0
34184838	22	36838214	.	.	.	.	PLA2G6	phospholipase A2, group VI (cytosolic, calcium-independent)	Nonsynon	0.83	Special	0	2	3.68	0	0	0	0	0	0	0	0	0	0	0	0	0	0	0	0	0	0	0	0	0	0	0	0	0	0	0	0	0	0	0	0	0	0	0
34525431	7	6024124	.	.	.	.	JTV1	-	Nonsynon	0.83	Special	0	2	3.68	0	0	0	0	0	0	0	0	0	0	0	0	0	0	0	0	0	0	0	0	0	0	0	0	0	0	0	0	0	0	0	0	0	0	0
34854854	22	38247449	.	.	.	.	ATF4	activating transcription factor 4 (tax-responsive enhancer element B67)	Nonsynon	0.83	Special	0	2	3.68	0	0	0	0	0	0	0	0	0	0	0	0	0	0	0	0	0	0	0	0	0	0	0	0	0	0	0	0	0	0	0	0	0	0	0
35099302	17	19226830	.	.	.	.	MAPK7	mitogen-activated protein kinase 7	Nonsynon	0.83	Special	0	2	3.68	0	0	0	0	0	0	0	0	0	0	0	0	0	0	0	0	0	0	0	0	0	0	0	0	0	0	0	0	0	0	0	0	0	0	0
35537874	22	36838117	.	.	.	.	PLA2G6	phospholipase A2, group VI (cytosolic, calcium-independent)	Nonsynon	0.83	Special	0	2	3.68	0	0	0	0	0	0	0	0	0	0	0	0	0	0	0	0	0	0	0	0	0	0	0	0	0	0	0	0	0	0	0	0	0	0	0
4647006	1	59022275	.	.	.	.	JUN	jun oncogene	mRNA-UTR	0.92	Goldman Gene	1	7	3.67	0	0	0	0	0	0	0	0	0	0	0	0	0	0	0	0	0	0	0	0	0	0	0	0	0	0	0	0	0	0	0	0	0	0	0
2941	6	146796825	0.042	0.011	0	0	GRM1	glutamate receptor, metabotropic 1	Nonsynon	0.82	The Glutamatergic System	0	2	3.67	0	1	0	0	0	0	0	0	1	0	0	0	0	0	0	0	0	0	0	0	0	0	0	0	0	0	0	0	0	0	0	0	0	1	1
6318	23	113871991	0.167	0.029	0.045	0.444	HTR2C	5-hydroxytryptamine (serotonin) receptor 2C	Nonsynon	0.82	The Serotonergic System	0	2	3.67	0	1	0	0	0	0	0	0	0	1	0	0	0	1	0	0	1	1	0	0	0	1	0	0	0	1	0	0	0	1	0	0	1	1	0
1048101	8	26683945	0.45	0.1	0.159	0.258	ADRA1A	adrenergic, alpha-1A-, receptor	Nonsynon	0.82	The Adrenergic System	0	2	3.67	0	1	0	0	0	0	1	0	1	1	1	1	1	1	1	1	1	1	1	1	1	1	1	1	1	1	1	1	1	1	1	1	1	1	1
1048102	8	26683693	0	0	0	0	ADRA1A	adrenergic, alpha-1A-, receptor	Nonsynon	0.82	The Adrenergic System	0	2	3.67	0	0	0	0	0	0	0	0	0	0	0	0	0	0	0	0	0	0	0	0	0	0	0	0	0	0	0	0	0	0	0	0	0	0	0
1050906	1	169353065	.	.	.	.	FMO3	flavin containing monooxygenase 3	Nonsynon	0.82	The Nicotine Metabolism System	0	2	3.67	0	0	0	0	0	0	0	0	0	0	0	0	0	0	0	0	0	0	0	0	0	0	0	0	0	0	0	0	0	0	0	0	0	0	0
1496121	8	26683858	0	0	0	0	ADRA1A	adrenergic, alpha-1A-, receptor	Nonsynon	0.82	The Adrenergic System	0	2	3.67	0	0	0	0	0	0	0	0	0	0	0	0	0	0	0	0	0	0	0	0	0	0	0	0	0	0	0	0	0	0	0	0	0	0	0
1736557	1	169346704	0.067	0.278	0.159	0.008	FMO3	flavin containing monooxygenase 3	Nonsynon	0.82	The Nicotine Metabolism System	0	2	3.67	1	0	1	1	1	1	1	1	1	1	1	1	1	1	1	1	1	1	1	1	1	1	1	1	1	1	1	1	1	1	1	1	1	1	1
2058194	17	59374080	0.492	0.429	0.395	0.183	SCN4A	sodium channel, voltage-gated, type IV, alpha subunit	Nonsynon	0.82	Special	0	2	3.67	0	0	0	0	1	1	1	1	1	0	0	0	0	0	0	0	0	1	1	1	1	1	1	1	1	1	1	1	1	1	1	1	1	1	1
2229126	8	26683589	0.025	0.067	0.023	0	ADRA1A	adrenergic, alpha-1A-, receptor	Nonsynon	0.82	The Adrenergic System	0	2	3.67	0	1	0	0	0	0	0	0	0	0	0	0	0	0	1	0	0	0	1	0	0	0	1	0	0	0	1	0	0	0	1	0	0	0	1
2340885	2	238849129	.	.	.	.	PER2	period homolog 2 (Drosophila)	Nonsynon	0.82	Special	0	2	3.67	0	0	0	0	0	0	0	0	0	0	0	0	0	0	0	0	0	0	0	0	0	0	0	0	0	0	0	0	0	0	0	0	0	0	0
3730247	8	26683743	0.009	0	0	0	ADRA1A	adrenergic, alpha-1A-, receptor	Nonsynon	0.82	The Adrenergic System	0	2	3.67	0	0	0	0	0	0	0	0	1	0	0	0	0	0	0	0	0	0	0	0	0	0	0	0	0	0	0	0	0	0	0	0	0	1	1
3739068	2	238849204	0	0	0	0	PER2	period homolog 2 (Drosophila)	Nonsynon	0.82	Special	0	2	3.67	0	0	0	0	0	0	0	0	0	0	0	0	0	0	0	0	0	0	0	0	0	0	0	0	0	0	0	0	0	0	0	0	0	0	0
6923492	6	146797017	0.441	0.478	0.477	0.308	GRM1	glutamate receptor, metabotropic 1	Nonsynon	0.82	The Glutamatergic System	0	2	3.67	0	1	0	0	0	0	0	0	0	1	1	1	1	1	1	1	1	1	1	1	1	1	1	1	1	1	1	1	1	1	1	1	1	1	1
17851188	2	65334431	.	.	.	.	ACTR2	ARP2 actin-related protein 2 homolog (yeast)	Nonsynon	0.82	Special	0	2	3.67	0	0	0	0	0	0	0	0	0	0	0	0	0	0	0	0	0	0	0	0	0	0	0	0	0	0	0	0	0	0	0	0	0	0	0
17855452	2	65327202	.	.	.	.	ACTR2	ARP2 actin-related protein 2 homolog (yeast)	Nonsynon	0.82	Special	0	2	3.67	0	0	0	0	0	0	0	0	0	0	0	0	0	0	0	0	0	0	0	0	0	0	0	0	0	0	0	0	0	0	0	0	0	0	0
28363549	1	169343972	.	.	.	.	FMO3	flavin containing monooxygenase 3	Nonsynon	0.82	The Nicotine Metabolism System	0	2	3.67	1	0	0	0	0	0	0	0	0	0	0	0	0	0	0	0	0	0	0	0	0	0	0	0	0	0	0	0	0	0	0	0	0	0	0
34394214	3	117054103	.	.	.	.	LSAMP	limbic system-associated membrane protein	Nonsynon	0.82	The Opioid System	0	2	3.67	0	0	0	0	0	0	0	0	0	0	0	0	0	0	0	0	0	0	0	0	0	0	0	0	0	0	0	0	0	0	0	0	0	0	0
34444335	6	146796879	.	.	.	.	GRM1	glutamate receptor, metabotropic 1	Nonsynon	0.82	The Glutamatergic System	0	2	3.67	0	0	0	0	0	0	0	0	0	0	0	0	0	0	0	0	0	0	0	0	0	0	0	0	0	0	0	0	0	0	0	0	0	0	0
34637063	22	37552573	.	.	.	.	NPTXR	neuronal pentraxin receptor	Nonsynon	0.82	Special	0	2	3.67	0	0	0	0	0	0	0	0	0	0	0	0	0	0	0	0	0	0	0	0	0	0	0	0	0	0	0	0	0	0	0	0	0	0	0
35329790	2	238849202	.	.	.	.	PER2	period homolog 2 (Drosophila)	Nonsynon	0.82	Special	0	2	3.67	0	0	0	0	0	0	0	0	0	0	0	0	0	0	0	0	0	0	0	0	0	0	0	0	0	0	0	0	0	0	0	0	0	0	0
41285859	6	146715214	.	.	.	.	GRM1	glutamate receptor, metabotropic 1	Nonsynon	0.82	The Glutamatergic System	0	2	3.67	0	0	0	0	0	0	0	0	0	0	0	0	0	0	0	0	0	0	0	0	0	0	0	0	0	0	0	0	0	0	0	0	0	0	0
7222491	17	55083346	0	0	0	0	CLTC	clathrin, heavy chain (Hc)	Nonsynon	.	Special	0	4	3.67	0	0	0	0	0	0	0	0	1	0	0	0	0	0	0	0	0	0	0	0	0	0	0	0	0	0	0	0	0	0	0	0	0	1	1
34422178	8	145137671	.	.	.	.	GRINA	glutamate receptor, ionotropic, N-methyl D-asparate-associated protein 1 (glutamate binding)	Nonsynon	.	The Glutamatergic System	0	4	3.67	0	0	0	0	0	0	0	0	0	0	0	0	0	0	0	0	0	0	0	0	0	0	0	0	0	0	0	0	0	0	0	0	0	0	0
34457496	8	145137672	.	.	.	.	GRINA	glutamate receptor, ionotropic, N-methyl D-asparate-associated protein 1 (glutamate binding)	Nonsynon	.	The Glutamatergic System	0	4	3.67	0	0	0	0	0	0	0	0	0	0	0	0	0	0	0	0	0	0	0	0	0	0	0	0	0	0	0	0	0	0	0	0	0	0	0
809810	2	114408371	0	0	0	0	ACTR3	ARP3 actin-related protein 3 homolog (yeast)	Nonsynon	0.81	Special	0	2	3.66	0	0	0	0	0	0	0	0	1	0	0	0	0	0	0	0	0	0	0	0	0	0	0	0	0	0	0	0	0	0	0	0	0	1	1
814192	2	114408398	.	.	.	.	ACTR3	ARP3 actin-related protein 3 homolog (yeast)	Nonsynon	0.81	Special	0	2	3.66	0	0	0	0	0	0	0	0	0	0	0	0	0	0	0	0	0	0	0	0	0	0	0	0	0	0	0	0	0	0	0	0	0	0	0
2289629	17	24984029	0.308	0.078	0.068	0.092	SSH2	slingshot homolog 2 (Drosophila)	Nonsynon	0.81	Special	0	2	3.66	0	0	0	1	1	1	1	1	1	0	0	0	0	1	1	1	1	1	1	1	1	1	1	1	1	1	1	1	1	1	1	1	1	1	1
6505140	17	24983969	0.008	0	0	0.008	SSH2	slingshot homolog 2 (Drosophila)	Nonsynon	0.81	Special	0	2	3.66	0	0	0	0	0	0	0	0	1	0	0	0	0	0	0	0	0	0	0	0	0	0	0	0	0	0	0	0	0	0	0	0	0	1	1
8080046	17	24982357	0	0	0	0.008	SSH2	slingshot homolog 2 (Drosophila)	Nonsynon	0.81	Special	0	2	3.66	0	0	0	0	0	0	0	0	1	0	0	0	0	0	0	0	0	0	0	0	0	0	0	0	0	0	0	0	0	0	0	0	0	1	1
11615567	12	53084908	0	0	0	0	ITGA5	integrin, alpha 5 (fibronectin receptor, alpha polypeptide)	Nonsynon	0.81	Special	0	2	3.66	0	0	0	0	0	0	0	0	0	0	0	0	0	0	0	0	0	0	0	0	0	0	0	0	0	0	0	0	0	0	0	0	0	0	0
35915626	1	155192872	.	.	.	.	ARHGEF11	Rho guanine nucleotide exchange factor (GEF) 11	Nonsynon	0.81	Special	0	2	3.66	0	0	0	0	0	0	0	0	0	0	0	0	0	0	0	0	0	0	0	0	0	0	0	0	0	0	0	0	0	0	0	0	0	0	0
41280102	17	59382652	.	.	.	.	SCN4A	sodium channel, voltage-gated, type IV, alpha subunit	Nonsynon	0.81	Special	0	2	3.66	0	0	0	0	0	0	0	0	0	0	0	0	0	0	0	0	0	0	0	0	0	0	0	0	0	0	0	0	0	0	0	0	0	0	0
33391	5	142660439	0	0	0	0	NR3C1	nuclear receptor subfamily 3, group C, member 1 (glucocorticoid receptor)	Nonsynon	0.8	Goldman Gene	0	2	3.65	0	0	0	0	0	0	1	0	1	0	0	0	0	0	0	0	0	0	0	0	0	0	0	0	0	1	1	1	1	0	0	0	0	1	1
1047705	17	59392455	.	.	.	.	SCN4A	sodium channel, voltage-gated, type IV, alpha subunit	Nonsynon	0.8	Special	0	2	3.65	0	0	0	0	0	0	0	0	0	0	0	0	0	0	0	0	0	0	0	0	0	0	0	0	0	0	0	0	0	0	0	0	0	0	0
1065020	17	7227513	.	.	.	.	TNK1	tyrosine kinase, non-receptor, 1	Nonsynon	0.8	Special	0	2	3.65	0	0	0	0	0	0	0	0	0	0	0	0	0	0	0	0	0	0	0	0	0	0	0	0	0	0	0	0	0	0	0	0	0	0	0
1800036	10	112828894	.	.	.	.	ADRA2A	adrenergic, alpha-2A-, receptor	Nonsynon	0.8	The Adrenergic System	0	2	3.65	0	0	0	0	0	0	0	0	0	0	0	0	0	0	0	0	0	0	0	0	0	0	0	0	0	0	0	0	0	0	0	0	0	0	0
2228673	17	25569357	.	.	.	.	SLC6A4	solute carrier family 6 (neurotransmitter transporter, serotonin), member 4	Nonsynon	0.8	The Serotonergic System	0	2	3.65	1	1	0	0	0	0	0	0	0	0	0	0	0	0	0	0	0	0	0	0	0	0	0	0	0	0	0	0	0	0	0	0	0	0	0
4781938	16	9851303	0	0	0	0	GRIN2A	glutamate receptor, ionotropic, N-methyl D-aspartate 2A	Nonsynon	0.8	The Glutamatergic System	0	2	3.65	0	0	0	0	0	0	0	0	0	0	0	0	0	0	0	0	0	0	0	0	0	0	0	0	0	0	0	0	0	0	0	0	0	0	0
11570680	22	36858834	0	0	0	0	PLA2G6	phospholipase A2, group VI (cytosolic, calcium-independent)	Nonsynon	0.8	Special	0	2	3.65	0	0	0	0	0	0	0	0	1	0	0	0	0	0	0	0	0	0	0	0	0	0	0	0	0	0	0	0	0	0	0	0	0	1	1
12947790	17	59402262	0	0	0	0	SCN4A	sodium channel, voltage-gated, type IV, alpha subunit	Nonsynon	0.8	Special	0	2	3.65	0	0	0	0	0	0	0	0	0	0	0	0	0	0	0	0	0	0	0	0	0	0	0	0	0	0	0	0	0	0	0	0	0	0	0
34322837	5	159331993	.	.	.	.	ADRA1B	adrenergic, alpha-1B-, receptor	Nonsynon	0.8	The Adrenergic System	0	2	3.65	0	0	0	0	0	0	0	0	0	0	0	0	0	0	0	0	0	0	0	0	0	0	0	0	0	0	0	0	0	0	0	0	0	0	0
34513763	17	59375811	.	.	.	.	SCN4A	sodium channel, voltage-gated, type IV, alpha subunit	Nonsynon	0.8	Special	0	2	3.65	0	0	0	0	0	0	0	0	0	0	0	0	0	0	0	0	0	0	0	0	0	0	0	0	0	0	0	0	0	0	0	0	0	0	0
34680086	1	65076784	.	.	.	.	JAK1	Janus kinase 1 (a protein tyrosine kinase)	Nonsynon	0.8	Special	0	2	3.65	0	0	0	0	0	0	0	0	0	0	0	0	0	0	0	0	0	0	0	0	0	0	0	0	0	0	0	0	0	0	0	0	0	0	0
34813135	2	65341998	.	.	.	.	ACTR2	ARP2 actin-related protein 2 homolog (yeast)	Nonsynon	0.8	Special	0	2	3.65	0	0	0	0	0	0	0	0	0	0	0	0	0	0	0	0	0	0	0	0	0	0	0	0	0	0	0	0	0	0	0	0	0	0	0
35263750	17	25569395	.	.	.	.	SLC6A4	solute carrier family 6 (neurotransmitter transporter, serotonin), member 4	Nonsynon	0.8	The Serotonergic System	0	2	3.65	0	0	0	0	0	0	0	0	0	0	0	0	0	0	0	0	0	0	0	0	0	0	0	0	0	0	0	0	0	0	0	0	0	0	0
35658213	10	112828990	.	.	.	.	ADRA2A	adrenergic, alpha-2A-, receptor	Nonsynon	0.8	The Adrenergic System	0	2	3.65	0	0	0	0	0	0	0	0	0	0	0	0	0	0	0	0	0	0	0	0	0	0	0	0	0	0	0	0	0	0	0	0	0	0	0
35733610	17	7227791	.	.	.	.	TNK1	tyrosine kinase, non-receptor, 1	Nonsynon	0.8	Special	0	2	3.65	0	0	0	0	0	0	0	0	0	0	0	0	0	0	0	0	0	0	0	0	0	0	0	0	0	0	0	0	0	0	0	0	0	0	0
41311751	5	170169198	.	.	.	.	GABRP	gamma-aminobutyric acid (GABA) A receptor, pi	Nonsynon	0.8	The GABA System	0	2	3.65	0	0	0	0	0	0	0	0	0	0	0	0	0	0	0	0	0	0	0	0	0	0	0	0	0	0	0	0	0	0	0	0	0	0	0
1043474	17	43413096	0	0	0	0	CDK5RAP3	CDK5 regulatory subunit associated protein 3	Nonsynon	0.79	Special	0	2	3.65	0	0	0	0	0	0	0	0	0	0	0	0	0	0	0	0	0	0	0	0	0	0	0	0	0	0	0	0	0	0	0	0	0	0	0
1049731	2	171383396	.	.	.	.	GAD1	glutamate decarboxylase 1 (brain, 67kDa)	Nonsynon	0.79	The Glutamatergic System	0	2	3.65	0	0	0	0	0	0	0	0	0	0	0	0	0	0	0	0	0	0	0	0	0	0	0	0	0	0	0	0	0	0	0	0	0	0	0
1049736	2	171424548	0	.	.	0	GAD1	glutamate decarboxylase 1 (brain, 67kDa)	Nonsynon	0.79	The Glutamatergic System	0	2	3.65	0	0	0	0	0	0	0	0	0	0	0	0	0	0	0	0	0	0	0	0	0	0	0	0	0	0	0	0	0	0	0	0	0	0	0
1805066	16	54276644	0.017	0	0	.	SLC6A2	solute carrier family 6 (neurotransmitter transporter, noradrenalin), member 2	Nonsynon	0.79	Neurotransmitter Transporters	0	2	3.65	0	0	0	1	0	0	0	0	0	0	0	0	0	1	1	1	1	0	0	0	0	0	0	0	0	0	0	0	0	0	0	0	0	0	0
5845396	22	37549114	.	.	.	.	NPTXR	neuronal pentraxin receptor	Nonsynon	0.79	Special	0	2	3.65	0	0	0	0	0	0	0	0	0	0	0	0	0	0	0	0	0	0	0	0	0	0	0	0	0	0	0	0	0	0	0	0	0	0	0
10401800	19	54128794	0.008	0	0	0.242	DHDH	dihydrodiol dehydrogenase (dimeric)	Nonsynon	0.79	Special	0	2	3.65	0	0	0	0	0	0	0	0	0	0	0	0	0	0	0	0	0	0	0	0	0	0	0	0	0	0	0	0	0	0	0	0	0	0	0
11098261	4	115808751	.	0	0	0.033	UGT8	UDP glycosyltransferase 8 (UDP-galactose ceramide galactosyltransferase)	Nonsynon	0.79	The Nicotine Metabolism System	0	2	3.65	0	0	0	1	0	0	1	0	0	0	0	0	0	1	1	1	1	0	0	0	0	0	0	0	0	1	1	1	1	0	0	0	0	0	0
11544566	7	6029507	0	0	0	0	JTV1	-	Nonsynon	0.79	Special	0	2	3.65	0	0	0	0	0	0	0	0	0	0	0	0	0	0	0	0	0	0	0	0	0	0	0	0	0	0	0	0	0	0	0	0	0	0	0
11556275	4	40957482	0	0	0	0	UCHL1	ubiquitin carboxyl-terminal esterase L1 (ubiquitin thiolesterase)	Nonsynon	0.79	Special	0	2	3.65	0	0	0	0	0	0	0	0	0	0	0	0	0	0	0	0	0	0	0	0	0	0	0	0	0	0	0	0	0	0	0	0	0	0	0
11556279	4	40957512	0	0	0	0	UCHL1	ubiquitin carboxyl-terminal esterase L1 (ubiquitin thiolesterase)	Nonsynon	0.79	Special	0	2	3.65	0	0	0	0	0	0	0	0	0	0	0	0	0	0	0	0	0	0	0	0	0	0	0	0	0	0	0	0	0	0	0	0	0	0	0
11570605	22	36895208	.	.	.	.	PLA2G6	phospholipase A2, group VI (cytosolic, calcium-independent)	Nonsynon	0.79	Special	0	2	3.65	0	0	0	0	0	0	0	0	0	0	0	0	0	0	0	0	0	0	0	0	0	0	0	0	0	0	0	0	0	0	0	0	0	0	0
11570606	22	36895193	0	0	0	0.025	PLA2G6	phospholipase A2, group VI (cytosolic, calcium-independent)	Nonsynon	0.79	Special	0	2	3.65	0	0	0	0	0	0	0	0	1	0	0	0	0	0	0	0	0	0	0	0	0	0	0	0	0	0	0	0	0	0	0	0	0	1	1
11570607	22	36895171	0	0	0	0	PLA2G6	phospholipase A2, group VI (cytosolic, calcium-independent)	Nonsynon	0.79	Special	0	2	3.65	0	0	0	0	0	0	0	0	1	0	0	0	0	0	0	0	0	0	0	0	0	0	0	0	0	0	0	0	0	0	0	0	0	1	1
34106725	17	59379035	.	.	.	.	SCN4A	sodium channel, voltage-gated, type IV, alpha subunit	Nonsynon	0.79	Special	0	2	3.65	0	0	0	0	0	0	0	0	0	0	0	0	0	0	0	0	0	0	0	0	0	0	0	0	0	0	0	0	0	0	0	0	0	0	0
34482513	22	36895312	.	.	.	.	PLA2G6	phospholipase A2, group VI (cytosolic, calcium-independent)	Nonsynon	0.79	Special	0	2	3.65	0	0	0	0	0	0	0	0	0	0	0	0	0	0	0	0	0	0	0	0	0	0	0	0	0	0	0	0	0	0	0	0	0	0	0
34542731	17	25563908	.	.	.	.	SLC6A4	solute carrier family 6 (neurotransmitter transporter, serotonin), member 4	Nonsynon	0.79	The Serotonergic System	0	2	3.65	0	0	0	0	0	0	0	0	0	0	0	0	0	0	0	0	0	0	0	0	0	0	0	0	0	0	0	0	0	0	0	0	0	0	0
34895723	2	238835608	.	.	.	.	PER2	period homolog 2 (Drosophila)	Nonsynon	0.79	Special	0	2	3.65	0	0	0	0	0	0	0	0	0	0	0	0	0	0	0	0	0	0	0	0	0	0	0	0	0	0	0	0	0	0	0	0	0	0	0
45484903	16	54276650	.	.	.	.	SLC6A2	solute carrier family 6 (neurotransmitter transporter, noradrenalin), member 2	Nonsynon	0.79	Neurotransmitter Transporters	0	2	3.65	0	0	0	0	0	0	0	0	0	0	0	0	0	0	0	0	0	0	0	0	0	0	0	0	0	0	0	0	0	0	0	0	0	0	0
5563	16	54283422	0	0	0	0	SLC6A2	solute carrier family 6 (neurotransmitter transporter, noradrenalin), member 2	Nonsynon	0.78	Neurotransmitter Transporters	0	2	3.64	0	0	0	0	0	0	0	0	1	0	0	0	0	0	0	0	0	0	0	0	0	0	0	0	0	0	0	0	0	0	0	0	0	1	1
769403	2	171421781	0	0	0	0	GAD1	glutamate decarboxylase 1 (brain, 67kDa)	Nonsynon	0.78	The Glutamatergic System	0	2	3.64	0	0	0	0	0	0	0	0	1	0	0	0	0	0	0	0	0	0	0	0	0	0	0	0	0	0	0	0	0	0	0	0	0	1	1
1805064	16	54248312	.	.	.	.	SLC6A2	solute carrier family 6 (neurotransmitter transporter, noradrenalin), member 2	Nonsynon	0.78	Neurotransmitter Transporters	0	2	3.64	0	0	0	0	0	0	0	0	0	0	0	0	0	0	0	0	0	0	0	0	0	0	0	0	0	0	0	0	0	0	0	0	0	0	0
3888798	11	87666857	0.034	0.148	0.14	0.051	CTSC	cathepsin C	Nonsynon	0.78	Special	0	2	3.64	0	0	1	1	0	0	0	0	1	1	1	1	1	1	1	1	1	0	0	0	0	0	1	1	0	0	1	1	0	0	1	1	0	1	1
4016638	12	53078661	.	.	.	.	ITGA5	integrin, alpha 5 (fibronectin receptor, alpha polypeptide)	Nonsynon	0.78	Special	0	2	3.64	0	0	0	0	0	0	0	0	0	0	0	0	0	0	0	0	0	0	0	0	0	0	0	0	0	0	0	0	0	0	0	0	0	0	0
10423255	19	54137586	0.059	0.024	0.07	0.035	DHDH	dihydrodiol dehydrogenase (dimeric)	Nonsynon	0.78	Special	0	2	3.64	0	0	0	0	0	0	0	0	1	0	0	0	0	0	0	1	0	0	0	1	0	0	0	1	0	0	0	1	0	0	0	1	0	1	1
11666105	19	54137629	0.164	0.411	0.443	0.331	DHDH	dihydrodiol dehydrogenase (dimeric)	Nonsynon	0.78	Special	0	2	3.64	0	0	0	0	1	1	1	1	1	0	0	0	0	0	0	0	0	1	1	1	1	1	1	1	1	1	1	1	1	1	1	1	1	1	1
13306039	16	54248198	.	.	.	.	SLC6A2	solute carrier family 6 (neurotransmitter transporter, noradrenalin), member 2	Nonsynon	0.78	Neurotransmitter Transporters	0	2	3.64	0	0	0	0	0	0	0	0	0	0	0	0	0	0	0	0	0	0	0	0	0	0	0	0	0	0	0	0	0	0	0	0	0	0	0
17855708	23	150893729	.	.	.	.	GABRE	gamma-aminobutyric acid (GABA) A receptor, epsilon	Nonsynon	0.78	The GABA System	0	2	3.64	0	0	0	0	0	0	0	0	0	0	0	0	0	0	0	0	0	0	0	0	0	0	0	0	0	0	0	0	0	0	0	0	0	0	0
28937571	11	87666979	.	.	.	.	CTSC	cathepsin C	Nonsynon	0.78	Special	0	2	3.64	0	0	0	0	0	0	0	0	0	0	0	0	0	0	0	0	0	0	0	0	0	0	0	0	0	0	0	0	0	0	0	0	0	0	0
34569558	1	155184845	.	.	.	.	ARHGEF11	Rho guanine nucleotide exchange factor (GEF) 11	Nonsynon	0.78	Special	0	2	3.64	0	0	0	0	0	0	0	0	0	0	0	0	0	0	0	0	0	0	0	0	0	0	0	0	0	0	0	0	0	0	0	0	0	0	0
34638651	11	87667064	.	.	.	.	CTSC	cathepsin C	Nonsynon	0.78	Special	0	2	3.64	0	0	0	0	0	0	0	0	0	0	0	0	0	0	0	0	0	0	0	0	0	0	0	0	0	0	0	0	0	0	0	0	0	0	0
34721389	17	59395660	.	.	.	.	SCN4A	sodium channel, voltage-gated, type IV, alpha subunit	Nonsynon	0.78	Special	0	2	3.64	0	0	0	0	0	0	0	0	0	0	0	0	0	0	0	0	0	0	0	0	0	0	0	0	0	0	0	0	0	0	0	0	0	0	0
34914278	17	59395768	.	.	.	.	SCN4A	sodium channel, voltage-gated, type IV, alpha subunit	Nonsynon	0.78	Special	0	2	3.64	0	0	0	0	0	0	0	0	0	0	0	0	0	0	0	0	0	0	0	0	0	0	0	0	0	0	0	0	0	0	0	0	0	0	0
35986308	1	111847178	.	.	.	.	ADORA3	adenosine A3 receptor	Nonsynon	0.78	Special	0	2	3.64	0	0	0	0	0	0	0	0	0	0	0	0	0	0	0	0	0	0	0	0	0	0	0	0	0	0	0	0	0	0	0	0	0	0	0
36112619	11	87666895	.	.	.	.	CTSC	cathepsin C	Nonsynon	0.78	Special	0	2	3.64	0	0	0	0	0	0	0	0	0	0	0	0	0	0	0	0	0	0	0	0	0	0	0	0	0	0	0	0	0	0	0	0	0	0	0
45535042	16	54248128	.	.	.	.	SLC6A2	solute carrier family 6 (neurotransmitter transporter, noradrenalin), member 2	Nonsynon	0.78	Neurotransmitter Transporters	0	2	3.64	0	0	0	0	0	0	0	0	0	0	0	0	0	0	0	0	0	0	0	0	0	0	0	0	0	0	0	0	0	0	0	0	0	0	0
45564432	16	54283395	.	.	.	.	SLC6A2	solute carrier family 6 (neurotransmitter transporter, noradrenalin), member 2	Nonsynon	0.78	Neurotransmitter Transporters	0	2	3.64	0	0	0	0	0	0	0	0	0	0	0	0	0	0	0	0	0	0	0	0	0	0	0	0	0	0	0	0	0	0	0	0	0	0	0
45566933	2	171408844	.	.	.	.	GAD1	glutamate decarboxylase 1 (brain, 67kDa)	Nonsynon	0.78	The Glutamatergic System	0	2	3.64	0	0	0	0	0	0	0	0	0	0	0	0	0	0	0	0	0	0	0	0	0	0	0	0	0	0	0	0	0	0	0	0	0	0	0
5565	16	54286734	0	0	0	0	SLC6A2	solute carrier family 6 (neurotransmitter transporter, noradrenalin), member 2	Nonsynon	0.77	Neurotransmitter Transporters	0	2	3.63	0	0	0	0	0	0	0	0	0	0	0	0	0	0	0	0	0	0	0	0	0	0	0	0	0	0	0	0	0	0	0	0	0	0	0
5566	16	54286773	0	0	0	0	SLC6A2	solute carrier family 6 (neurotransmitter transporter, noradrenalin), member 2	Nonsynon	0.77	Neurotransmitter Transporters	0	2	3.63	0	1	0	0	0	0	0	0	1	0	0	0	0	0	0	0	0	0	0	0	0	0	0	0	0	0	0	0	0	0	0	0	0	1	1
5567	16	54286792	0	0	0	0	SLC6A2	solute carrier family 6 (neurotransmitter transporter, noradrenalin), member 2	Nonsynon	0.77	Neurotransmitter Transporters	0	2	3.63	0	0	0	0	0	0	1	0	1	0	0	0	0	0	0	0	0	0	0	0	0	0	0	0	0	1	1	1	1	0	0	0	0	1	1
5570	16	54289437	0.009	0	0	0	SLC6A2	solute carrier family 6 (neurotransmitter transporter, noradrenalin), member 2	Nonsynon	0.77	Neurotransmitter Transporters	0	2	3.63	0	0	0	0	0	0	1	0	1	0	0	0	0	0	0	0	0	0	0	0	0	0	0	0	0	1	1	1	1	0	0	0	0	1	1
6355	17	25572936	0.025	0	0	0	SLC6A4	solute carrier family 6 (neurotransmitter transporter, serotonin), member 4	Nonsynon	0.77	The Serotonergic System	0	2	3.63	1	1	0	0	0	0	0	0	0	0	0	0	0	0	0	0	0	0	0	0	0	0	0	0	0	0	0	0	0	0	0	0	0	0	0
401640	2	114416257	.	.	.	.	ACTR3	ARP3 actin-related protein 3 homolog (yeast)	Nonsynon	0.77	Special	0	2	3.63	0	0	0	0	0	0	0	0	0	0	0	0	0	0	0	0	0	0	0	0	0	0	0	0	0	0	0	0	0	0	0	0	0	0	0
407371	2	114416315	0	0	0	0	ACTR3	ARP3 actin-related protein 3 homolog (yeast)	Nonsynon	0.77	Special	0	2	3.63	0	0	0	0	0	0	0	0	0	0	0	0	0	0	0	0	0	0	0	0	0	0	0	0	0	0	0	0	0	0	0	0	0	0	0
1044267	11	87669001	0	0	0	0	CTSC	cathepsin C	Nonsynon	0.77	Special	0	2	3.63	0	0	0	0	0	0	0	0	0	0	0	0	0	0	0	0	0	0	0	0	0	0	0	0	0	0	0	0	0	0	0	0	0	0	0
1061417	23	150873846	0	0	0	0	GABRE	gamma-aminobutyric acid (GABA) A receptor, epsilon	Nonsynon	0.77	The GABA System	0	2	3.63	0	0	0	0	0	0	0	0	1	0	0	0	0	0	0	0	0	0	0	0	0	0	0	0	0	0	0	0	0	0	0	0	0	1	1
2234910	16	54289394	.	.	.	.	SLC6A2	solute carrier family 6 (neurotransmitter transporter, noradrenalin), member 2	Nonsynon	0.77	Neurotransmitter Transporters	0	2	3.63	0	0	0	0	0	0	0	0	0	0	0	0	0	0	0	0	0	0	0	0	0	0	0	0	0	0	0	0	0	0	0	0	0	0	0
2700161	12	53081471	.	.	.	.	ITGA5	integrin, alpha 5 (fibronectin receptor, alpha polypeptide)	Nonsynon	0.77	Special	0	2	3.63	0	0	0	0	0	0	0	0	0	0	0	0	0	0	0	0	0	0	0	0	0	0	0	0	0	0	0	0	0	0	0	0	0	0	0
2800889	1	111844255	0	0	0.067	0.033	ADORA3	adenosine A3 receptor	Nonsynon	0.77	Special	0	2	3.63	0	0	0	0	0	0	0	0	0	0	0	1	0	0	0	1	0	0	0	0	0	0	0	0	0	0	0	0	0	0	0	0	0	0	0
2856383	23	150873938	.	.	.	.	GABRE	gamma-aminobutyric acid (GABA) A receptor, epsilon	Nonsynon	0.77	The GABA System	0	2	3.63	0	0	0	0	0	0	0	0	0	0	0	0	0	0	0	0	0	0	0	0	0	0	0	0	0	0	0	0	0	0	0	0	0	0	0
6504191	17	59394800	0.095	0	0	0.102	SCN4A	sodium channel, voltage-gated, type IV, alpha subunit	Nonsynon	0.77	Special	0	2	3.63	0	0	0	0	0	0	0	0	1	0	0	0	0	1	0	0	0	1	0	0	0	1	0	0	0	1	0	0	0	1	0	0	0	1	1
12318746	12	53083698	0	0.012	0	0	ITGA5	integrin, alpha 5 (fibronectin receptor, alpha polypeptide)	Nonsynon	0.77	Special	0	2	3.63	0	0	0	0	0	0	0	0	1	0	0	0	0	0	0	0	0	0	0	0	0	0	0	0	0	0	0	0	0	0	0	0	0	1	1
17852913	4	45737952	.	.	.	.	GABRG1	gamma-aminobutyric acid (GABA) A receptor, gamma 1	Nonsynon	0.77	The GABA System	0	2	3.63	0	0	0	0	0	0	0	0	0	0	0	0	0	0	0	0	0	0	0	0	0	0	0	0	0	0	0	0	0	0	0	0	0	0	0
17855051	16	54289322	.	.	.	.	SLC6A2	solute carrier family 6 (neurotransmitter transporter, noradrenalin), member 2	Nonsynon	0.77	Neurotransmitter Transporters	0	2	3.63	0	0	0	0	0	0	0	0	0	0	0	0	0	0	0	0	0	0	0	0	0	0	0	0	0	0	0	0	0	0	0	0	0	0	0
28914832	17	25562500	.	.	.	.	SLC6A4	solute carrier family 6 (neurotransmitter transporter, serotonin), member 4	Nonsynon	0.77	The Serotonergic System	0	2	3.63	1	0	0	0	0	0	0	0	0	0	0	0	0	0	0	0	0	0	0	0	0	0	0	0	0	0	0	0	0	0	0	0	0	0	0
34090058	2	114405415	.	.	.	.	ACTR3	ARP3 actin-related protein 3 homolog (yeast)	Nonsynon	0.77	Special	0	2	3.63	0	0	0	0	0	0	0	0	0	0	0	0	0	0	0	0	0	0	0	0	0	0	0	0	0	0	0	0	0	0	0	0	0	0	0
35307000	19	54139917	.	.	.	.	DHDH	dihydrodiol dehydrogenase (dimeric)	Nonsynon	0.77	Special	0	2	3.63	0	0	0	0	0	0	0	0	0	0	0	0	0	0	0	0	0	0	0	0	0	0	0	0	0	0	0	0	0	0	0	0	0	0	0
35511654	1	111844310	.	.	.	.	ADORA3	adenosine A3 receptor	Nonsynon	0.77	Special	0	2	3.63	0	0	0	0	0	0	0	0	0	0	0	0	0	0	0	0	0	0	0	0	0	0	0	0	0	0	0	0	0	0	0	0	0	0	0
41303781	4	45820661	.	.	.	.	GABRG1	gamma-aminobutyric acid (GABA) A receptor, gamma 1	Nonsynon	0.77	The GABA System	0	2	3.63	0	0	0	0	0	0	0	0	0	0	0	0	0	0	0	0	0	0	0	0	0	0	0	0	0	0	0	0	0	0	0	0	0	0	0
41307941	4	45737968	.	.	.	.	GABRG1	gamma-aminobutyric acid (GABA) A receptor, gamma 1	Nonsynon	0.77	The GABA System	0	2	3.63	0	0	0	0	0	0	0	0	0	0	0	0	0	0	0	0	0	0	0	0	0	0	0	0	0	0	0	0	0	0	0	0	0	0	0
41311284	4	45737938	.	.	.	.	GABRG1	gamma-aminobutyric acid (GABA) A receptor, gamma 1	Nonsynon	0.77	The GABA System	0	2	3.63	0	0	0	0	0	0	0	0	0	0	0	0	0	0	0	0	0	0	0	0	0	0	0	0	0	0	0	0	0	0	0	0	0	0	0
2654	1	59019835	0	0	0	0	JUN	jun oncogene	mRNA-UTR	0.87	Goldman Gene	1	7	3.63	0	0	0	0	0	0	0	0	0	0	0	0	0	0	0	0	0	0	0	0	0	0	0	0	0	0	0	0	0	0	0	0	0	0	0
2655	1	59019791	.	.	.	.	JUN	jun oncogene	mRNA-UTR	0.87	Goldman Gene	1	7	3.63	0	0	0	0	0	0	0	0	0	0	0	0	0	0	0	0	0	0	0	0	0	0	0	0	0	0	0	0	0	0	0	0	0	0	0
4647015	1	59020107	.	.	.	.	JUN	jun oncogene	mRNA-UTR	0.87	Goldman Gene	1	7	3.63	0	0	0	0	0	0	0	0	0	0	0	0	0	0	0	0	0	0	0	0	0	0	0	0	0	0	0	0	0	0	0	0	0	0	0
4647016	1	59019806	.	.	.	.	JUN	jun oncogene	mRNA-UTR	0.87	Goldman Gene	1	7	3.63	0	0	0	0	0	0	0	0	0	0	0	0	0	0	0	0	0	0	0	0	0	0	0	0	0	0	0	0	0	0	0	0	0	0	0
9282771	1	59019544	.	.	.	.	JUN	jun oncogene	mRNA-UTR	0.87	Goldman Gene	1	7	3.63	0	0	0	0	0	0	0	0	0	0	0	0	0	0	0	0	0	0	0	0	0	0	0	0	0	0	0	0	0	0	0	0	0	0	0
11550970	1	59020301	.	.	.	.	JUN	jun oncogene	mRNA-UTR	0.87	Goldman Gene	1	7	3.63	0	0	0	0	0	0	0	0	0	0	0	0	0	0	0	0	0	0	0	0	0	0	0	0	0	0	0	0	0	0	0	0	0	0	0
4878	5	130523107	0	0	0	0	HINT1	histidine triad nucleotide binding protein 1	Nonsynon	0.76	Special	0	2	3.62	0	0	0	0	0	0	0	0	0	0	0	0	0	0	0	0	0	0	0	0	0	0	0	0	0	0	0	0	0	0	0	0	0	0	0
5558	16	54291060	0	0	0	0	SLC6A2	solute carrier family 6 (neurotransmitter transporter, noradrenalin), member 2	Nonsynon	0.76	Neurotransmitter Transporters	0	2	3.62	0	0	0	0	0	0	0	0	1	0	0	0	0	0	0	0	0	0	0	0	0	0	0	0	0	0	0	0	0	0	0	0	0	1	1
6352	17	25554319	0	0.067	0.078	0	SLC6A4	solute carrier family 6 (neurotransmitter transporter, serotonin), member 4	Nonsynon	0.76	The Serotonergic System	0	2	3.62	1	1	0	0	0	0	1	0	1	0	0	0	0	0	0	0	0	0	0	0	0	0	0	0	0	1	1	1	1	0	0	0	0	1	1
1065021	17	7232637	.	.	.	.	TNK1	tyrosine kinase, non-receptor, 1	Nonsynon	0.76	Special	0	2	3.62	0	0	0	0	0	0	0	0	0	0	0	0	0	0	0	0	0	0	0	0	0	0	0	0	0	0	0	0	0	0	0	0	0	0	0
1142391	17	7232849	.	.	.	.	TNK1	tyrosine kinase, non-receptor, 1	Nonsynon	0.76	Special	0	2	3.62	0	0	0	0	0	0	0	0	0	0	0	0	0	0	0	0	0	0	0	0	0	0	0	0	0	0	0	0	0	0	0	0	0	0	0
1142392	17	7232904	.	.	.	.	TNK1	tyrosine kinase, non-receptor, 1	Nonsynon	0.76	Special	0	2	3.62	0	0	0	0	0	0	0	0	0	0	0	0	0	0	0	0	0	0	0	0	0	0	0	0	0	0	0	0	0	0	0	0	0	0	0
1142393	17	7233030	.	.	.	.	TNK1	tyrosine kinase, non-receptor, 1	Nonsynon	0.76	Special	0	2	3.62	0	0	0	0	0	0	0	0	0	0	0	0	0	0	0	0	0	0	0	0	0	0	0	0	0	0	0	0	0	0	0	0	0	0	0
6503018	17	7232831	0.042	0.222	0.364	0.467	TNK1	tyrosine kinase, non-receptor, 1	Nonsynon	0.76	Special	0	2	3.62	0	0	0	1	1	1	1	1	1	0	1	1	0	1	1	1	1	1	1	1	1	1	1	1	1	1	1	1	1	1	1	1	1	1	1
11558046	5	130523121	0	0	0	0	HINT1	histidine triad nucleotide binding protein 1	Nonsynon	0.76	Special	0	2	3.62	0	0	0	0	0	0	0	0	0	0	0	0	0	0	0	0	0	0	0	0	0	0	0	0	0	0	0	0	0	0	0	0	0	0	0
11570646	22	36869120	0	0	0	0	PLA2G6	phospholipase A2, group VI (cytosolic, calcium-independent)	Nonsynon	0.76	Special	0	2	3.62	0	0	0	0	0	0	0	0	1	0	0	0	0	0	0	0	0	0	0	0	0	0	0	0	0	0	0	0	0	0	0	0	0	1	1
12948207	17	43408352	.	.	.	.	CDK5RAP3	CDK5 regulatory subunit associated protein 3	Nonsynon	0.76	Special	0	2	3.62	0	0	0	0	0	0	0	0	0	0	0	0	0	0	0	0	0	0	0	0	0	0	0	0	0	0	0	0	0	0	0	0	0	0	0
28914833	17	25561715	.	.	.	.	SLC6A4	solute carrier family 6 (neurotransmitter transporter, serotonin), member 4	Nonsynon	0.76	The Serotonergic System	0	2	3.62	1	0	0	0	0	0	0	0	0	0	0	0	0	0	0	0	0	0	0	0	0	0	0	0	0	0	0	0	0	0	0	0	0	0	0
35333999	2	238826696	.	.	.	.	PER2	period homolog 2 (Drosophila)	Nonsynon	0.76	Special	0	2	3.62	0	0	0	0	0	0	0	0	0	0	0	0	0	0	0	0	0	0	0	0	0	0	0	0	0	0	0	0	0	0	0	0	0	0	0
35494079	17	43407966	.	.	.	.	CDK5RAP3	CDK5 regulatory subunit associated protein 3	Nonsynon	0.76	Special	0	2	3.62	0	0	0	0	0	0	0	0	0	0	0	0	0	0	0	0	0	0	0	0	0	0	0	0	0	0	0	0	0	0	0	0	0	0	0
35514331	17	25561720	.	.	.	.	SLC6A4	solute carrier family 6 (neurotransmitter transporter, serotonin), member 4	Nonsynon	0.76	The Serotonergic System	0	2	3.62	0	0	0	0	0	0	0	0	0	0	0	0	0	0	0	0	0	0	0	0	0	0	0	0	0	0	0	0	0	0	0	0	0	0	0
35998480	2	238826557	.	.	.	.	PER2	period homolog 2 (Drosophila)	Nonsynon	0.76	Special	0	2	3.62	0	0	0	0	0	0	0	0	0	0	0	0	0	0	0	0	0	0	0	0	0	0	0	0	0	0	0	0	0	0	0	0	0	0	0
36046975	17	7232571	.	.	.	.	TNK1	tyrosine kinase, non-receptor, 1	Nonsynon	0.76	Special	0	2	3.62	0	0	0	0	0	0	0	0	0	0	0	0	0	0	0	0	0	0	0	0	0	0	0	0	0	0	0	0	0	0	0	0	0	0	0
36067919	17	7232464	.	.	.	.	TNK1	tyrosine kinase, non-receptor, 1	Nonsynon	0.76	Special	0	2	3.62	0	0	0	0	0	0	0	0	0	0	0	0	0	0	0	0	0	0	0	0	0	0	0	0	0	0	0	0	0	0	0	0	0	0	0
41280110	17	59403481	.	.	.	.	SCN4A	sodium channel, voltage-gated, type IV, alpha subunit	Nonsynon	0.76	Special	0	2	3.62	0	0	0	0	0	0	0	0	0	0	0	0	0	0	0	0	0	0	0	0	0	0	0	0	0	0	0	0	0	0	0	0	0	0	0
1124050	23	101799121	0	0	0	0.067	GPRASP1	G protein-coupled receptor associated sorting protein 1	Synon	0.95	Special	0	4	3.62	0	0	0	0	0	0	0	0	1	0	0	0	1	0	0	0	1	0	0	0	0	0	0	0	0	0	0	0	1	0	0	0	1	1	1
2073116	23	101797993	0	0.029	0.03	0	GPRASP1	G protein-coupled receptor associated sorting protein 1	Synon	0.95	Special	0	4	3.62	0	0	0	0	0	0	0	0	1	0	0	0	0	0	0	0	0	0	0	0	0	0	0	0	0	0	0	0	0	0	0	0	0	1	1
1042855	17	19226037	.	.	.	.	MAPK7	mitogen-activated protein kinase 7	Nonsynon	0.75	Special	0	2	3.61	0	0	0	0	0	0	0	0	0	0	0	0	0	0	0	0	0	0	0	0	0	0	0	0	0	0	0	0	0	0	0	0	0	0	0
1047701	17	59403902	.	.	.	.	SCN4A	sodium channel, voltage-gated, type IV, alpha subunit	Nonsynon	0.75	Special	0	2	3.61	0	0	0	0	0	0	0	0	0	0	0	0	0	0	0	0	0	0	0	0	0	0	0	0	0	0	0	0	0	0	0	0	0	0	0
2230739	16	3973437	0.408	0.411	0.409	0.15	ADCY9	adenylate cyclase 9	Nonsynon	0.75	Special	0	2	3.61	0	0	0	0	1	1	1	1	1	0	0	0	0	0	0	0	0	1	1	1	1	1	1	1	1	1	1	1	1	1	1	1	1	1	1
2303134	5	170148821	0	0	0	0	GABRP	gamma-aminobutyric acid (GABA) A receptor, pi	Nonsynon	0.75	The GABA System	0	2	3.61	0	0	0	0	0	0	0	0	1	0	0	0	0	0	0	0	0	0	0	0	0	0	0	0	0	0	0	0	0	0	0	0	0	1	1
2856386	23	150879016	0	0	0	0	GABRE	gamma-aminobutyric acid (GABA) A receptor, epsilon	Nonsynon	0.75	The GABA System	0	2	3.61	0	0	0	0	0	0	0	0	1	0	0	0	0	0	0	0	0	0	0	0	0	0	0	0	0	0	0	0	0	0	0	0	0	1	1
3830420	19	54134661	.	.	.	.	DHDH	dihydrodiol dehydrogenase (dimeric)	Nonsynon	0.75	Special	0	2	3.61	0	0	0	0	0	0	0	0	0	0	0	0	0	0	0	0	0	0	0	0	0	0	0	0	0	0	0	0	0	0	0	0	0	0	0
10830430	11	89541802	0.133	0	0	0.364	NAALAD2	N-acetylated alpha-linked acidic dipeptidase 2	Nonsynon	0.75	The Glutamatergic System	0	2	3.61	0	0	0	0	1	1	1	1	1	1	0	0	0	1	0	0	0	1	1	1	1	1	1	1	1	1	1	1	1	1	1	1	1	1	1
11545890	17	43406356	0	0	0	0	CDK5RAP3	CDK5 regulatory subunit associated protein 3	Nonsynon	0.75	Special	0	2	3.61	0	0	0	0	0	0	0	0	0	0	0	0	0	0	0	0	0	0	0	0	0	0	0	0	0	0	0	0	0	0	0	0	0	0	0
34112430	22	36842061	.	.	.	.	PLA2G6	phospholipase A2, group VI (cytosolic, calcium-independent)	Nonsynon	0.75	Special	0	2	3.61	0	0	0	0	0	0	0	0	0	0	0	0	0	0	0	0	0	0	0	0	0	0	0	0	0	0	0	0	0	0	0	0	0	0	0
34888386	19	54134587	.	.	.	.	DHDH	dihydrodiol dehydrogenase (dimeric)	Nonsynon	0.75	Special	0	2	3.61	0	0	0	0	0	0	0	0	0	0	0	0	0	0	0	0	0	0	0	0	0	0	0	0	0	0	0	0	0	0	0	0	0	0	0
34992596	17	19226305	.	.	.	.	MAPK7	mitogen-activated protein kinase 7	Nonsynon	0.75	Special	0	2	3.61	0	0	0	0	0	0	0	0	0	0	0	0	0	0	0	0	0	0	0	0	0	0	0	0	0	0	0	0	0	0	0	0	0	0	0
35453148	19	54134749	.	.	.	.	DHDH	dihydrodiol dehydrogenase (dimeric)	Nonsynon	0.75	Special	0	2	3.61	0	0	0	0	0	0	0	0	0	0	0	0	0	0	0	0	0	0	0	0	0	0	0	0	0	0	0	0	0	0	0	0	0	0	0
35572922	2	238851304	.	.	.	.	PER2	period homolog 2 (Drosophila)	Nonsynon	0.75	Special	0	2	3.61	0	0	0	0	0	0	0	0	0	0	0	0	0	0	0	0	0	0	0	0	0	0	0	0	0	0	0	0	0	0	0	0	0	0	0
3210997	5	78707489	.	.	.	.	HOMER1	homer homolog 1 (Drosophila)	mRNA-UTR	0.85	Special	1	6	3.61	0	0	0	0	0	0	0	0	0	0	0	0	0	0	0	0	0	0	0	0	0	0	0	0	0	0	0	0	0	0	0	0	0	0	0
3822568	5	78706558	0.4	0.333	0.188	0	HOMER1	homer homolog 1 (Drosophila)	mRNA-UTR	0.85	Special	1	6	3.61	0	0	0	1	0	1	1	1	1	0	0	1	0	1	1	1	1	1	0	0	0	1	1	1	1	1	1	1	1	1	1	1	1	1	1
34470593	5	78707502	.	.	.	.	HOMER1	homer homolog 1 (Drosophila)	mRNA-UTR	0.85	Special	1	6	3.61	0	0	0	0	0	0	0	0	0	0	0	0	0	0	0	0	0	0	0	0	0	0	0	0	0	0	0	0	0	0	0	0	0	0	0
5632	12	119248194	.	0	0	0	PLA2G1B	phospholipase A2, group IB (pancreas)	Nonsynon	0.74	Special	0	2	3.61	0	0	0	0	0	0	0	0	1	0	0	0	0	0	0	0	0	0	0	0	0	0	0	0	0	0	0	0	0	0	0	0	0	1	1
1805065	16	54260999	0.017	0	0	.	SLC6A2	solute carrier family 6 (neurotransmitter transporter, noradrenalin), member 2	Nonsynon	0.74	Neurotransmitter Transporters	0	2	3.61	0	0	0	1	0	0	0	0	0	0	0	0	0	1	1	1	1	0	0	0	0	0	0	0	0	0	0	0	0	0	0	0	0	0	0
2760118	6	24611569	0.317	0.133	0.193	0.475	ALDH5A1	aldehyde dehydrogenase 5 family, member A1 (succinate-semialdehyde dehydrogenase)	Nonsynon	0.74	The Alcohol System	0	2	3.61	0	0	0	0	0	0	1	0	1	1	1	1	0	1	1	1	0	1	1	1	0	1	1	1	0	1	1	1	1	1	1	1	0	1	1
3765310	6	24611576	0.027	0.045	0.105	0.029	ALDH5A1	aldehyde dehydrogenase 5 family, member A1 (succinate-semialdehyde dehydrogenase)	Nonsynon	0.74	The Alcohol System	0	2	3.61	0	0	0	0	0	0	1	0	1	0	0	0	0	0	0	0	0	0	0	0	0	0	0	0	0	1	1	1	1	0	0	0	0	1	1
3831268	1	155173248	.	.	.	.	ARHGEF11	Rho guanine nucleotide exchange factor (GEF) 11	Nonsynon	0.74	Special	0	2	3.61	0	0	0	0	0	0	0	0	0	0	0	0	0	0	0	0	0	0	0	0	0	0	0	0	0	0	0	0	0	0	0	0	0	0	0
6977072	7	6015629	.	.	.	.	JTV1	-	Nonsynon	0.74	Special	0	2	3.61	0	0	0	0	0	0	0	0	0	0	0	0	0	0	0	0	0	0	0	0	0	0	0	0	0	0	0	0	0	0	0	0	0	0	0
7221752	17	43405937	0	0	0	0	CDK5RAP3	CDK5 regulatory subunit associated protein 3	Nonsynon	0.74	Special	0	2	3.61	0	0	0	0	0	0	0	0	0	0	0	0	0	0	0	0	0	0	0	0	0	0	0	0	0	0	0	0	0	0	0	0	0	0	0
12809294	12	119248170	.	.	.	.	PLA2G1B	phospholipase A2, group IB (pancreas)	Nonsynon	0.74	Special	0	2	3.61	0	0	0	0	0	0	0	0	0	0	0	0	0	0	0	0	0	0	0	0	0	0	0	0	0	0	0	0	0	0	0	0	0	0	0
12810628	12	119248069	.	.	.	.	PLA2G1B	phospholipase A2, group IB (pancreas)	Nonsynon	0.74	Special	0	2	3.61	0	0	0	0	0	0	0	0	0	0	0	0	0	0	0	0	0	0	0	0	0	0	0	0	0	0	0	0	0	0	0	0	0	0	0
13306041	16	54261065	0	0	0	0	SLC6A2	solute carrier family 6 (neurotransmitter transporter, noradrenalin), member 2	Nonsynon	0.74	Neurotransmitter Transporters	0	2	3.61	0	0	0	0	0	0	0	0	1	0	0	0	0	0	0	0	0	0	0	0	0	0	0	0	0	0	0	0	0	0	0	0	0	1	1
34257823	1	155205772	.	.	.	.	ARHGEF11	Rho guanine nucleotide exchange factor (GEF) 11	Nonsynon	0.74	Special	0	2	3.61	0	0	0	0	0	0	0	0	0	0	0	0	0	0	0	0	0	0	0	0	0	0	0	0	0	0	0	0	0	0	0	0	0	0	0
34876841	11	87682033	.	.	.	.	CTSC	cathepsin C	Nonsynon	0.74	Special	0	2	3.61	0	0	0	0	0	0	0	0	0	0	0	0	0	0	0	0	0	0	0	0	0	0	0	0	0	0	0	0	0	0	0	0	0	0	0
2760499	1	59021401	.	.	.	.	JUN	jun oncogene	mRNA-UTR	0.84	Goldman Gene	1	7	3.6	0	0	0	0	0	0	0	0	0	0	0	0	0	0	0	0	0	0	0	0	0	0	0	0	0	0	0	0	0	0	0	0	0	0	0
2811894	1	59021619	.	.	.	.	JUN	jun oncogene	mRNA-UTR	0.84	Goldman Gene	1	7	3.6	0	0	0	0	0	0	0	0	0	0	0	0	0	0	0	0	0	0	0	0	0	0	0	0	0	0	0	0	0	0	0	0	0	0	0
4647010	1	59021856	.	.	.	.	JUN	jun oncogene	mRNA-UTR	0.84	Goldman Gene	1	7	3.6	0	0	0	0	0	0	0	0	0	0	0	0	0	0	0	0	0	0	0	0	0	0	0	0	0	0	0	0	0	0	0	0	0	0	0
4647011	1	59021504	.	.	.	.	JUN	jun oncogene	mRNA-UTR	0.84	Goldman Gene	1	7	3.6	0	0	0	0	0	0	0	0	0	0	0	0	0	0	0	0	0	0	0	0	0	0	0	0	0	0	0	0	0	0	0	0	0	0	0
4647012	1	59021394	.	.	.	.	JUN	jun oncogene	mRNA-UTR	0.84	Goldman Gene	1	7	3.6	0	0	0	0	0	0	0	0	0	0	0	0	0	0	0	0	0	0	0	0	0	0	0	0	0	0	0	0	0	0	0	0	0	0	0
4647013	1	59021362	.	.	.	.	JUN	jun oncogene	mRNA-UTR	0.84	Goldman Gene	1	7	3.6	0	0	0	0	0	0	0	0	0	0	0	0	0	0	0	0	0	0	0	0	0	0	0	0	0	0	0	0	0	0	0	0	0	0	0
12040370	1	59021455	.	.	.	.	JUN	jun oncogene	mRNA-UTR	0.84	Goldman Gene	1	7	3.6	0	0	0	0	0	0	0	0	0	0	0	0	0	0	0	0	0	0	0	0	0	0	0	0	0	0	0	0	0	0	0	0	0	0	0
28403912	8	143692680	.	.	.	.	ARC	activity-regulated cytoskeleton-associated protein	mRNA-UTR	0.84	Special	1	6	3.6	0	0	0	0	0	0	0	0	0	0	0	0	0	0	0	0	0	0	0	0	0	0	0	0	0	0	0	0	0	0	0	0	0	0	0
28641083	8	143692683	.	.	.	.	ARC	activity-regulated cytoskeleton-associated protein	mRNA-UTR	0.84	Special	1	6	3.6	0	0	0	0	0	0	0	0	0	0	0	0	0	0	0	0	0	0	0	0	0	0	0	0	0	0	0	0	0	0	0	0	0	0	0
5635	12	119247176	0	0	0	0	PLA2G1B	phospholipase A2, group IB (pancreas)	Nonsynon	0.73	Special	0	2	3.6	0	0	0	0	0	0	0	0	1	0	0	0	0	0	0	0	0	0	0	0	0	0	0	0	0	0	0	0	0	0	0	0	0	1	1
5636	12	119247175	.	.	.	.	PLA2G1B	phospholipase A2, group IB (pancreas)	Nonsynon	0.73	Special	0	2	3.6	0	0	0	0	0	0	0	0	0	0	0	0	0	0	0	0	0	0	0	0	0	0	0	0	0	0	0	0	0	0	0	0	0	0	0
769402	2	171423633	0	0	0	0.216	GAD1	glutamate decarboxylase 1 (brain, 67kDa)	Nonsynon	0.73	The Glutamatergic System	0	2	3.6	0	0	0	0	0	0	0	0	1	0	0	0	1	0	0	0	1	0	0	0	0	0	0	0	0	0	0	0	0	0	0	0	0	1	1
891398	8	27380739	0.45	0.478	0.375	0.158	CHRNA2	cholinergic receptor, nicotinic, alpha 2 (neuronal)	Nonsynon	0.73	The Nicotine System	0	2	3.6	1	0	1	1	1	1	1	1	1	1	1	1	1	1	1	1	1	1	1	1	1	1	1	1	1	1	1	1	1	1	1	1	1	1	1
11556274	4	40958516	.	.	.	.	UCHL1	ubiquitin carboxyl-terminal esterase L1 (ubiquitin thiolesterase)	Nonsynon	0.73	Special	0	2	3.6	0	0	0	0	0	0	0	0	0	0	0	0	0	0	0	0	0	0	0	0	0	0	0	0	0	0	0	0	0	0	0	0	0	0	0
34236419	2	171423609	.	.	.	.	GAD1	glutamate decarboxylase 1 (brain, 67kDa)	Nonsynon	0.73	The Glutamatergic System	0	2	3.6	0	0	0	0	0	0	0	0	0	0	0	0	0	0	0	0	0	0	0	0	0	0	0	0	0	0	0	0	0	0	0	0	0	0	0
34460325	17	43409122	.	.	.	.	CDK5RAP3	CDK5 regulatory subunit associated protein 3	Nonsynon	0.73	Special	0	2	3.6	0	0	0	0	0	0	0	0	0	0	0	0	0	0	0	0	0	0	0	0	0	0	0	0	0	0	0	0	0	0	0	0	0	0	0
35054799	17	43410257	.	.	.	.	CDK5RAP3	CDK5 regulatory subunit associated protein 3	Nonsynon	0.73	Special	0	2	3.6	0	0	0	0	0	0	0	0	0	0	0	0	0	0	0	0	0	0	0	0	0	0	0	0	0	0	0	0	0	0	0	0	0	0	0
35064732	12	53088817	.	.	.	.	ITGA5	integrin, alpha 5 (fibronectin receptor, alpha polypeptide)	Nonsynon	0.73	Special	0	2	3.6	0	0	0	0	0	0	0	0	0	0	0	0	0	0	0	0	0	0	0	0	0	0	0	0	0	0	0	0	0	0	0	0	0	0	0
35187704	1	155178342	.	.	.	.	ARHGEF11	Rho guanine nucleotide exchange factor (GEF) 11	Nonsynon	0.73	Special	0	2	3.6	0	0	0	0	0	0	0	0	0	0	0	0	0	0	0	0	0	0	0	0	0	0	0	0	0	0	0	0	0	0	0	0	0	0	0
45447392	11	87707812	.	.	.	.	CTSC	cathepsin C	Nonsynon	0.73	Special	0	2	3.6	0	0	0	0	0	0	0	0	0	0	0	0	0	0	0	0	0	0	0	0	0	0	0	0	0	0	0	0	0	0	0	0	0	0	0
5871	14	89941231	0.093	0.409	0.5	0.127	CALM1	calmodulin 1 (phosphorylase kinase, delta)	mRNA-UTR	0.83	Special	1	11	3.59	1	0	0	0	1	1	1	1	1	0	0	0	0	0	0	0	0	1	1	1	1	1	1	1	1	1	1	1	1	1	1	1	1	1	1
1059285	14	89941550	.	.	.	.	CALM1	calmodulin 1 (phosphorylase kinase, delta)	mRNA-UTR	0.83	Special	1	11	3.59	0	0	0	0	0	0	0	0	0	0	0	0	0	0	0	0	0	0	0	0	0	0	0	0	0	0	0	0	0	0	0	0	0	0	0
12886186	14	89933176	.	.	.	.	CALM1	calmodulin 1 (phosphorylase kinase, delta)	mRNA-UTR	0.83	Special	1	11	3.59	0	0	0	0	0	0	0	0	0	0	0	0	0	0	0	0	0	0	0	0	0	0	0	0	0	0	0	0	0	0	0	0	0	0	0
35149335	14	89941667	.	.	.	.	CALM1	calmodulin 1 (phosphorylase kinase, delta)	mRNA-UTR	0.83	Special	1	11	3.59	0	0	0	0	0	0	0	0	0	0	0	0	0	0	0	0	0	0	0	0	0	0	0	0	0	0	0	0	0	0	0	0	0	0	0
868188	1	155173739	.	.	.	.	ARHGEF11	Rho guanine nucleotide exchange factor (GEF) 11	Nonsynon	0.72	Special	0	2	3.59	0	0	0	0	0	0	0	0	0	0	0	0	0	0	0	0	0	0	0	0	0	0	0	0	0	0	0	0	0	0	0	0	0	0	0
934945	2	238819792	0.133	0.267	0.205	0	PER2	period homolog 2 (Drosophila)	Nonsynon	0.72	Special	0	2	3.59	0	0	0	0	1	1	1	1	1	0	0	0	0	0	0	0	0	1	1	1	1	1	1	1	1	1	1	1	1	1	1	1	1	1	1
945508	1	155173705	0.5	0.189	0.159	0.059	ARHGEF11	Rho guanine nucleotide exchange factor (GEF) 11	Nonsynon	0.72	Special	0	2	3.59	0	0	0	0	1	1	1	1	1	1	1	1	1	1	1	1	1	1	1	1	1	1	1	1	1	1	1	1	1	1	1	1	1	1	1
5030732	4	40954390	.	.	.	.	UCHL1	ubiquitin carboxyl-terminal esterase L1 (ubiquitin thiolesterase)	Nonsynon	0.72	Special	0	2	3.59	0	0	0	0	0	0	0	0	0	0	0	0	0	0	0	0	0	0	0	0	0	0	0	0	0	0	0	0	0	0	0	0	0	0	0
7536646	1	169441315	0	0	0	0.175	FMO2	flavin containing monooxygenase 2 (non-functional)	Synon	0.92	The Nicotine Metabolism System	0	4	3.59	0	0	1	1	0	0	1	0	1	1	1	1	1	1	1	1	1	0	0	0	0	0	0	0	1	1	1	1	1	0	0	0	1	1	1
10042	8	26571580	0.025	0	0	0	DPYSL2	dihydropyrimidinase-like 2	mRNA-UTR	0.82	Special	1	10	3.59	0	0	0	0	0	0	0	0	0	0	0	0	0	0	0	0	0	0	0	0	0	0	0	0	0	0	0	0	0	0	0	0	0	0	0
10495	8	26571389	0.092	0.011	0	0	DPYSL2	dihydropyrimidinase-like 2	mRNA-UTR	0.82	Special	1	10	3.59	0	0	0	1	0	1	1	1	1	0	0	0	0	1	1	1	1	0	0	0	0	1	1	1	1	1	1	1	1	1	1	1	1	1	1
11527	8	26571169	.	.	.	.	DPYSL2	dihydropyrimidinase-like 2	mRNA-UTR	0.82	Special	1	10	3.59	0	0	0	0	0	0	0	0	0	0	0	0	0	0	0	0	0	0	0	0	0	0	0	0	0	0	0	0	0	0	0	0	0	0	0
17666	8	26571375	0.258	0.167	0.167	0.467	DPYSL2	dihydropyrimidinase-like 2	mRNA-UTR	0.82	Special	1	10	3.59	0	0	1	1	1	1	1	1	1	1	1	1	1	1	1	1	1	1	1	1	1	1	1	1	1	1	1	1	1	1	1	1	1	1	1
1058457	8	26571493	.	.	.	.	DPYSL2	dihydropyrimidinase-like 2	mRNA-UTR	0.82	Special	1	10	3.59	0	0	0	0	0	0	0	0	0	0	0	0	0	0	0	0	0	0	0	0	0	0	0	0	0	0	0	0	0	0	0	0	0	0	0
1803519	8	26571515	.	.	.	.	DPYSL2	dihydropyrimidinase-like 2	mRNA-UTR	0.82	Special	1	10	3.59	0	0	0	0	0	0	0	0	0	0	0	0	0	0	0	0	0	0	0	0	0	0	0	0	0	0	0	0	0	0	0	0	0	0	0
34673092	8	26571410	.	.	.	.	DPYSL2	dihydropyrimidinase-like 2	mRNA-UTR	0.82	Special	1	10	3.59	0	0	0	0	0	0	0	0	0	0	0	0	0	0	0	0	0	0	0	0	0	0	0	0	0	0	0	0	0	0	0	0	0	0	0
35258691	8	26571486	.	.	.	.	DPYSL2	dihydropyrimidinase-like 2	mRNA-UTR	0.82	Special	1	10	3.59	0	0	0	0	0	0	0	0	0	0	0	0	0	0	0	0	0	0	0	0	0	0	0	0	0	0	0	0	0	0	0	0	0	0	0
41276289	8	26570922	.	.	.	.	DPYSL2	dihydropyrimidinase-like 2	mRNA-UTR	0.82	Special	1	10	3.59	0	0	0	0	0	0	0	0	0	0	0	0	0	0	0	0	0	0	0	0	0	0	0	0	0	0	0	0	0	0	0	0	0	0	0
45471201	8	26571055	.	.	.	.	DPYSL2	dihydropyrimidinase-like 2	mRNA-UTR	0.82	Special	1	10	3.59	0	0	0	0	0	0	0	0	0	0	0	0	0	0	0	0	0	0	0	0	0	0	0	0	0	0	0	0	0	0	0	0	0	0	0
217086	11	87685231	0.15	0	0	0.068	CTSC	cathepsin C	Nonsynon	0.71	Special	0	2	3.59	0	0	0	0	1	1	1	1	1	1	0	0	1	1	0	0	1	1	1	1	1	1	1	1	1	1	1	1	1	1	1	1	1	1	1
2228669	23	113867611	.	.	.	.	HTR2C	5-hydroxytryptamine (serotonin) receptor 2C	Nonsynon	0.71	The Serotonergic System	0	2	3.59	0	1	0	0	0	0	0	0	0	0	0	0	0	0	0	0	0	0	0	0	0	0	0	0	0	0	0	0	0	0	0	0	0	0	0
2270941	19	54130175	0.217	0.389	0.489	0.233	DHDH	dihydrodiol dehydrogenase (dimeric)	Nonsynon	0.71	Special	0	2	3.59	0	0	0	0	1	1	1	1	1	0	0	0	0	0	0	0	0	1	1	1	1	1	1	1	1	1	1	1	1	1	1	1	1	1	1
4429421	2	238829172	0.009	0	0	0	PER2	period homolog 2 (Drosophila)	Nonsynon	0.71	Special	0	2	3.59	0	0	0	0	0	0	0	0	0	0	0	0	0	0	0	0	0	0	0	0	0	0	0	0	0	0	0	0	0	0	0	0	0	0	0
12276475	11	29989733	0	0	0	0	KCNA4	potassium voltage-gated channel, shaker-related subfamily, member 4	Nonsynon	0.91	Special	0	1	3.58	0	0	0	0	0	0	0	0	0	0	0	0	0	0	0	0	0	0	0	0	0	0	0	0	0	0	0	0	0	0	0	0	0	0	0
28932769	17	40344202	.	.	.	.	GFAP	glial fibrillary acidic protein	Nonsynon	0.91	Special	0	1	3.58	0	0	0	0	0	0	0	0	0	0	0	0	0	0	0	0	0	0	0	0	0	0	0	0	0	0	0	0	0	0	0	0	0	0	0
34947479	4	3738391	.	.	.	.	ADRA2C	adrenergic, alpha-2C-, receptor	Nonsynon	0.91	The Adrenergic System	0	1	3.58	0	0	0	0	0	0	0	0	0	0	0	0	0	0	0	0	0	0	0	0	0	0	0	0	0	0	0	0	0	0	0	0	0	0	0
36059154	11	29989525	.	.	.	.	KCNA4	potassium voltage-gated channel, shaker-related subfamily, member 4	Nonsynon	0.91	Special	0	1	3.58	0	0	0	0	0	0	0	0	0	0	0	0	0	0	0	0	0	0	0	0	0	0	0	0	0	0	0	0	0	0	0	0	0	0	0
41282920	11	29990350	.	.	.	.	KCNA4	potassium voltage-gated channel, shaker-related subfamily, member 4	Nonsynon	0.91	Special	0	1	3.58	0	0	0	0	0	0	0	0	0	0	0	0	0	0	0	0	0	0	0	0	0	0	0	0	0	0	0	0	0	0	0	0	0	0	0
1139916	23	150888835	0.322	0.118	0.091	0.456	GABRE	gamma-aminobutyric acid (GABA) A receptor, epsilon	Nonsynon	0.7	The GABA System	0	2	3.58	0	0	0	1	1	1	1	1	1	0	0	0	0	1	1	1	1	1	1	1	1	1	1	1	1	1	1	1	1	1	1	1	1	1	1
1805067	16	54289924	.	.	.	.	SLC6A2	solute carrier family 6 (neurotransmitter transporter, noradrenalin), member 2	Nonsynon	0.7	Neurotransmitter Transporters	0	2	3.58	0	0	0	0	0	0	0	0	0	0	0	0	0	0	0	0	0	0	0	0	0	0	0	0	0	0	0	0	0	0	0	0	0	0	0
15414	14	89944277	.	.	.	.	CALM1	calmodulin 1 (phosphorylase kinase, delta)	mRNA-UTR	0.81	Special	1	11	3.58	0	0	0	0	0	0	0	0	0	0	0	0	0	0	0	0	0	0	0	0	0	0	0	0	0	0	0	0	0	0	0	0	0	0	0
1058903	14	89943551	0.075	0.078	0.156	0.125	CALM1	calmodulin 1 (phosphorylase kinase, delta)	mRNA-UTR	0.81	Special	1	11	3.58	0	0	0	0	1	1	1	1	1	0	0	0	0	1	0	0	0	1	1	1	1	1	1	1	1	1	1	1	1	1	1	1	1	1	1
11539544	14	89943526	.	.	.	.	CALM1	calmodulin 1 (phosphorylase kinase, delta)	mRNA-UTR	0.81	Special	1	11	3.58	0	0	0	0	0	0	0	0	0	0	0	0	0	0	0	0	0	0	0	0	0	0	0	0	0	0	0	0	0	0	0	0	0	0	0
1046004	2	10971070	.	.	.	.	KCNF1	potassium voltage-gated channel, subfamily F, member 1	Nonsynon	0.9	Special	0	1	3.57	0	0	0	0	0	0	0	0	0	0	0	0	0	0	0	0	0	0	0	0	0	0	0	0	0	0	0	0	0	0	0	0	0	0	0
1046005	2	10971150	.	.	.	.	KCNF1	potassium voltage-gated channel, subfamily F, member 1	Nonsynon	0.9	Special	0	1	3.57	0	0	0	0	0	0	0	0	0	0	0	0	0	0	0	0	0	0	0	0	0	0	0	0	0	0	0	0	0	0	0	0	0	0	0
35100271	2	156894796	.	.	.	.	NR4A2	nuclear receptor subfamily 4, group A, member 2	Nonsynon	0.9	Special	0	1	3.57	0	0	0	0	0	0	0	0	0	0	0	0	0	0	0	0	0	0	0	0	0	0	0	0	0	0	0	0	0	0	0	0	0	0	0
36083712	2	156894135	.	.	.	.	NR4A2	nuclear receptor subfamily 4, group A, member 2	Nonsynon	0.9	Special	0	1	3.57	0	0	0	0	0	0	0	0	0	0	0	0	0	0	0	0	0	0	0	0	0	0	0	0	0	0	0	0	0	0	0	0	0	0	0
3765148	19	54139525	0.067	0.078	0.058	0.117	DHDH	dihydrodiol dehydrogenase (dimeric)	Nonsynon	0.69	Special	0	2	3.57	0	0	0	1	1	1	1	1	1	0	0	0	0	1	1	1	1	1	1	1	1	1	1	1	1	1	1	1	1	1	1	1	1	1	1
34809067	19	54139513	.	.	.	.	DHDH	dihydrodiol dehydrogenase (dimeric)	Nonsynon	0.69	Special	0	2	3.57	0	0	0	0	0	0	0	0	0	0	0	0	0	0	0	0	0	0	0	0	0	0	0	0	0	0	0	0	0	0	0	0	0	0	0
6928	22	20445004	0.483	0.478	0.375	0.483	MAPK1	mitogen-activated protein kinase 1	mRNA-UTR	0.8	Special	1	23	3.57	0	0	0	1	0	0	0	0	0	1	1	1	0	1	1	1	1	1	1	1	0	1	1	1	0	1	1	1	0	1	1	1	0	1	1
5327	5	174802600	0	0	0	0	DRD1	dopamine receptor D1	Nonsynon	0.89	The Dopamine System	0	1	3.56	1	1	0	0	0	0	0	0	0	0	0	0	0	0	0	0	0	0	0	0	0	0	0	0	0	0	0	0	0	0	0	0	0	0	0
5328	5	174802599	0	0.022	0	0	DRD1	dopamine receptor D1	Nonsynon	0.89	The Dopamine System	0	1	3.56	0	0	0	0	0	0	0	0	0	0	0	0	0	0	0	0	0	0	0	0	0	0	0	0	0	0	0	0	0	0	0	0	0	0	0
5330	5	174802559	0	0	0	0	DRD1	dopamine receptor D1	Nonsynon	0.89	The Dopamine System	0	1	3.56	0	0	0	0	0	0	0	0	0	0	0	0	0	0	0	0	0	0	0	0	0	0	0	0	0	0	0	0	0	0	0	0	0	0	0
5331	5	174802114	.	0	0	0	DRD1	dopamine receptor D1	Nonsynon	0.89	The Dopamine System	0	1	3.56	1	1	0	0	0	0	0	0	1	0	0	0	0	0	0	0	0	0	0	0	0	0	0	0	0	0	0	0	0	0	0	0	0	1	1
2020861	1	169435209	.	.	.	.	FMO2	flavin containing monooxygenase 2 (non-functional)	Synon	0.89	The Nicotine Metabolism System	0	4	3.56	0	0	0	0	0	0	0	0	0	0	0	0	0	0	0	0	0	0	0	0	0	0	0	0	0	0	0	0	0	0	0	0	0	0	0
2020868	1	169429175	.	.	.	.	FMO2	flavin containing monooxygenase 2 (non-functional)	Synon	0.89	The Nicotine Metabolism System	0	4	3.56	0	0	0	0	0	0	0	0	0	0	0	0	0	0	0	0	0	0	0	0	0	0	0	0	0	0	0	0	0	0	0	0	0	0	0
3180325	1	44246817	0.009	0	0	0	SLC6A9	solute carrier family 6 (neurotransmitter transporter, glycine), member 9	Nonsynon	0.89	Neurotransmitter Transporters	0	1	3.56	0	0	0	0	0	0	0	0	0	0	0	0	0	0	0	0	0	0	0	0	0	0	0	0	0	0	0	0	0	0	0	0	0	0	0
3729696	3	139957402	0	0	0	0	PIK3CB	phosphoinositide-3-kinase, catalytic, beta polypeptide	Nonsynon	0.89	Special	0	1	3.56	0	0	0	0	0	0	0	0	1	0	0	0	0	0	0	0	0	0	0	0	0	0	0	0	0	0	0	0	0	0	0	0	0	1	1
3751845	16	3718338	0	0.156	0.057	.	CREBBP	CREB binding protein (Rubinstein-Taybi syndrome)	Synon	0.89	Special	0	4	3.56	0	0	0	0	0	0	0	0	1	0	0	0	0	0	0	0	0	0	0	0	0	0	0	0	0	0	0	0	0	0	0	0	0	1	1
13306309	5	174802024	.	.	.	.	DRD1	dopamine receptor D1	Nonsynon	0.89	The Dopamine System	0	1	3.56	0	0	0	0	0	0	0	0	0	0	0	0	0	0	0	0	0	0	0	0	0	0	0	0	0	0	0	0	0	0	0	0	0	0	0
28369849	1	169429178	.	.	.	.	FMO2	flavin containing monooxygenase 2 (non-functional)	Synon	0.89	The Nicotine Metabolism System	0	4	3.56	0	0	0	0	0	0	0	0	0	0	0	0	0	0	0	0	0	0	0	0	0	0	0	0	0	0	0	0	0	0	0	0	0	0	0
35023781	3	139957286	.	.	.	.	PIK3CB	phosphoinositide-3-kinase, catalytic, beta polypeptide	Nonsynon	0.89	Special	0	1	3.56	0	0	0	0	0	0	0	0	0	0	0	0	0	0	0	0	0	0	0	0	0	0	0	0	0	0	0	0	0	0	0	0	0	0	0
1800926	5	71052204	.	.	.	.	CART	CART prepropeptide	mRNA-UTR	0.79	Goldman Gene	1	7	3.56	0	0	0	0	0	0	0	0	0	0	0	0	0	0	0	0	0	0	0	0	0	0	0	0	0	0	0	0	0	0	0	0	0	0	0
3814843	14	89942766	0.035	0.116	0.136	0.009	CALM1	calmodulin 1 (phosphorylase kinase, delta)	mRNA-UTR	0.79	Special	1	11	3.56	1	0	0	0	0	0	0	0	1	0	0	0	0	0	0	0	0	0	0	0	0	0	0	0	0	0	0	0	0	0	0	0	0	1	1
5868607	5	71052219	.	.	.	.	CART	CART prepropeptide	mRNA-UTR	0.79	Goldman Gene	1	7	3.56	0	0	0	0	0	0	0	0	0	0	0	0	0	0	0	0	0	0	0	0	0	0	0	0	0	0	0	0	0	0	0	0	0	0	0
7716804	5	71052275	0	0	0	0.092	CART	CART prepropeptide	mRNA-UTR	0.79	Goldman Gene	1	7	3.56	0	0	0	0	0	0	0	0	1	0	0	0	0	0	0	0	1	0	0	0	0	0	0	0	0	0	0	0	0	0	0	0	1	1	1
7731997	5	71052324	0	0	0	0.075	CART	CART prepropeptide	mRNA-UTR	0.79	Goldman Gene	1	7	3.56	0	1	0	0	0	0	0	1	1	0	0	0	0	0	0	0	0	0	0	0	0	0	0	0	0	0	0	0	0	1	1	1	1	1	1
35418035	14	89942684	.	.	.	.	CALM1	calmodulin 1 (phosphorylase kinase, delta)	mRNA-UTR	0.79	Special	1	11	3.56	0	0	0	0	0	0	0	0	0	0	0	0	0	0	0	0	0	0	0	0	0	0	0	0	0	0	0	0	0	0	0	0	0	0	0
41271753	5	71052237	.	.	.	.	CART	CART prepropeptide	mRNA-UTR	0.79	Goldman Gene	1	7	3.56	0	0	0	0	0	0	0	0	0	0	0	0	0	0	0	0	0	0	0	0	0	0	0	0	0	0	0	0	0	0	0	0	0	0	0
9340	22	20445353	0.433	0.205	0.193	0.417	MAPK1	mitogen-activated protein kinase 1	mRNA-UTR	0.78	Special	1	23	3.55	0	0	0	0	0	0	0	0	1	1	1	1	0	1	1	1	1	1	1	1	1	1	1	1	1	1	1	1	1	1	1	1	1	1	1
1048752	22	20448433	.	.	.	.	MAPK1	mitogen-activated protein kinase 1	mRNA-UTR	0.78	Special	1	23	3.55	0	0	0	0	0	0	0	0	0	0	0	0	0	0	0	0	0	0	0	0	0	0	0	0	0	0	0	0	0	0	0	0	0	0	0
1803546	22	20448410	.	.	.	.	MAPK1	mitogen-activated protein kinase 1	mRNA-UTR	0.78	Special	1	23	3.55	0	0	0	0	0	0	0	0	0	0	0	0	0	0	0	0	0	0	0	0	0	0	0	0	0	0	0	0	0	0	0	0	0	0	0
41282607	22	20448229	.	.	.	.	MAPK1	mitogen-activated protein kinase 1	mRNA-UTR	0.78	Special	1	23	3.55	0	0	0	0	0	0	0	0	0	0	0	0	0	0	0	0	0	0	0	0	0	0	0	0	0	0	0	0	0	0	0	0	0	0	0
1042339	12	13607940	0	0	0	.	GRIN2B	glutamate receptor, ionotropic, N-methyl D-aspartate 2B	Nonsynon	0.88	The Glutamatergic System	0	1	3.55	0	0	0	0	0	0	0	0	1	0	0	0	0	0	0	0	0	0	0	0	0	0	0	0	0	0	0	0	0	0	0	0	0	1	1
11676272	2	24995042	0.483	0.378	0.465	0.034	ADCY3	adenylate cyclase 3	Nonsynon	0.88	Special	0	1	3.55	0	0	0	0	0	0	0	0	1	0	1	1	0	1	1	1	0	1	1	1	0	1	1	1	0	1	1	1	0	1	1	1	0	1	1
13166146	5	153065456	0	0	0	0	GRIA1	glutamate receptor, ionotropic, AMPA 1	Nonsynon	0.88	The Glutamatergic System	0	1	3.55	0	0	0	0	0	0	0	0	1	0	0	0	0	0	0	0	0	0	0	0	0	0	0	0	0	0	0	0	0	0	0	0	0	1	1
13166161	5	153065558	0	0	0	0	GRIA1	glutamate receptor, ionotropic, AMPA 1	Nonsynon	0.88	The Glutamatergic System	0	1	3.55	0	0	0	0	0	0	0	0	0	0	0	0	0	0	0	0	0	0	0	0	0	0	0	0	0	0	0	0	0	0	0	0	0	0	0
13166438	5	153065603	0	0	0	0	GRIA1	glutamate receptor, ionotropic, AMPA 1	Nonsynon	0.88	The Glutamatergic System	0	1	3.55	0	0	0	0	0	0	0	0	1	0	0	0	0	0	0	0	0	0	0	0	0	0	0	0	0	0	0	0	0	0	0	0	0	1	1
13186047	5	153065466	0	0	0	0	GRIA1	glutamate receptor, ionotropic, AMPA 1	Nonsynon	0.88	The Glutamatergic System	0	1	3.55	0	0	0	0	0	0	0	0	0	0	0	0	0	0	0	0	0	0	0	0	0	0	0	0	0	0	0	0	0	0	0	0	0	0	0
13186241	5	153065641	0	0	0	0	GRIA1	glutamate receptor, ionotropic, AMPA 1	Nonsynon	0.88	The Glutamatergic System	0	1	3.55	0	0	0	0	0	0	0	0	1	0	0	0	0	0	0	0	0	0	0	0	0	0	0	0	0	0	0	0	0	0	0	0	0	1	1
13186365	5	153065661	.	.	.	.	GRIA1	glutamate receptor, ionotropic, AMPA 1	Nonsynon	0.88	The Glutamatergic System	0	1	3.55	0	0	0	0	0	0	0	0	0	0	0	0	0	0	0	0	0	0	0	0	0	0	0	0	0	0	0	0	0	0	0	0	0	0	0
13186534	5	153065759	0	0	0	0	GRIA1	glutamate receptor, ionotropic, AMPA 1	Nonsynon	0.88	The Glutamatergic System	0	1	3.55	0	0	0	0	0	0	0	0	1	0	0	0	0	0	0	0	0	0	0	0	0	0	0	0	0	0	0	0	0	0	0	0	0	1	1
17852413	17	27839394	.	.	.	.	CDK5R1	cyclin-dependent kinase 5, regulatory subunit 1 (p35)	Nonsynon	0.88	Goldman Gene	0	1	3.55	0	0	0	0	0	0	0	0	0	0	0	0	0	0	0	0	0	0	0	0	0	0	0	0	0	0	0	0	0	0	0	0	0	0	0
17852832	17	27839328	.	.	.	.	CDK5R1	cyclin-dependent kinase 5, regulatory subunit 1 (p35)	Nonsynon	0.88	Goldman Gene	0	1	3.55	0	0	0	0	0	0	0	0	0	0	0	0	0	0	0	0	0	0	0	0	0	0	0	0	0	0	0	0	0	0	0	0	0	0	0
28404146	5	153065625	.	.	.	.	GRIA1	glutamate receptor, ionotropic, AMPA 1	Nonsynon	0.88	The Glutamatergic System	0	1	3.55	0	0	0	0	0	0	0	0	0	0	0	0	0	0	0	0	0	0	0	0	0	0	0	0	0	0	0	0	0	0	0	0	0	0	0
28758858	5	153065627	.	.	.	.	GRIA1	glutamate receptor, ionotropic, AMPA 1	Nonsynon	0.88	The Glutamatergic System	0	1	3.55	0	0	0	0	0	0	0	0	0	0	0	0	0	0	0	0	0	0	0	0	0	0	0	0	0	0	0	0	0	0	0	0	0	0	0
34575986	20	34494287	.	.	.	.	DLGAP4	discs, large (Drosophila) homolog-associated protein 4	Nonsynon	0.88	Special	0	1	3.55	0	0	0	0	0	0	0	0	0	0	0	0	0	0	0	0	0	0	0	0	0	0	0	0	0	0	0	0	0	0	0	0	0	0	0
35260946	12	13607152	.	.	.	.	GRIN2B	glutamate receptor, ionotropic, N-methyl D-aspartate 2B	Nonsynon	0.88	The Glutamatergic System	0	1	3.55	0	0	0	0	0	0	0	0	0	0	0	0	0	0	0	0	0	0	0	0	0	0	0	0	0	0	0	0	0	0	0	0	0	0	0
35379044	15	76708682	.	.	.	.	CHRNB4	cholinergic receptor, nicotinic, beta 4	Nonsynon	0.88	The Nicotine System	0	1	3.55	0	0	0	0	0	0	0	0	0	0	0	0	0	0	0	0	0	0	0	0	0	0	0	0	0	0	0	0	0	0	0	0	0	0	0
35523603	1	35143002	.	.	.	.	DLGAP3	discs, large (Drosophila) homolog-associated protein 3	Nonsynon	0.88	Special	0	1	3.55	0	0	0	0	0	0	0	0	0	0	0	0	0	0	0	0	0	0	0	0	0	0	0	0	0	0	0	0	0	0	0	0	0	0	0
35694596	20	34493563	.	.	.	.	DLGAP4	discs, large (Drosophila) homolog-associated protein 4	Nonsynon	0.88	Special	0	1	3.55	0	0	0	0	0	0	0	0	0	0	0	0	0	0	0	0	0	0	0	0	0	0	0	0	0	0	0	0	0	0	0	0	0	0	0
41272515	1	169432486	.	.	.	.	FMO2	flavin containing monooxygenase 2 (non-functional)	Synon	0.88	The Nicotine Metabolism System	0	4	3.55	0	0	0	0	0	0	0	0	0	0	0	0	0	0	0	0	0	0	0	0	0	0	0	0	0	0	0	0	0	0	0	0	0	0	0
41283434	20	34493692	.	.	.	.	DLGAP4	discs, large (Drosophila) homolog-associated protein 4	Nonsynon	0.88	Special	0	1	3.55	0	0	0	0	0	0	0	0	0	0	0	0	0	0	0	0	0	0	0	0	0	0	0	0	0	0	0	0	0	0	0	0	0	0	0
41283436	20	34493869	.	.	.	.	DLGAP4	discs, large (Drosophila) homolog-associated protein 4	Nonsynon	0.88	Special	0	1	3.55	0	0	0	0	0	0	0	0	0	0	0	0	0	0	0	0	0	0	0	0	0	0	0	0	0	0	0	0	0	0	0	0	0	0	0
41283438	20	34494414	.	.	.	.	DLGAP4	discs, large (Drosophila) homolog-associated protein 4	Nonsynon	0.88	Special	0	1	3.55	0	0	0	0	0	0	0	0	0	0	0	0	0	0	0	0	0	0	0	0	0	0	0	0	0	0	0	0	0	0	0	0	0	0	0
45540034	12	13607544	.	.	.	.	GRIN2B	glutamate receptor, ionotropic, N-methyl D-aspartate 2B	Nonsynon	0.88	The Glutamatergic System	0	1	3.55	0	0	0	0	0	0	0	0	0	0	0	0	0	0	0	0	0	0	0	0	0	0	0	0	0	0	0	0	0	0	0	0	0	0	0
13058	22	20447502	0.042	0.033	0	0.033	MAPK1	mitogen-activated protein kinase 1	mRNA-UTR	0.77	Special	1	23	3.55	0	0	0	0	0	0	0	0	0	0	0	0	0	0	0	0	0	0	0	0	0	0	0	0	0	0	0	0	0	0	0	0	0	0	0
11541173	14	89933299	.	.	.	.	CALM1	calmodulin 1 (phosphorylase kinase, delta)	mRNA-UTR	0.77	Special	1	11	3.55	0	0	0	0	0	0	0	0	0	0	0	0	0	0	0	0	0	0	0	0	0	0	0	0	0	0	0	0	0	0	0	0	0	0	0
12886083	14	89933296	.	.	.	.	CALM1	calmodulin 1 (phosphorylase kinase, delta)	mRNA-UTR	0.77	Special	1	11	3.55	0	0	0	0	0	0	0	0	0	0	0	0	0	0	0	0	0	0	0	0	0	0	0	0	0	0	0	0	0	0	0	0	0	0	0
1133450	4	3739333	.	.	.	.	ADRA2C	adrenergic, alpha-2C-, receptor	Nonsynon	0.87	The Adrenergic System	0	1	3.55	0	0	0	0	0	0	0	0	0	0	0	0	0	0	0	0	0	0	0	0	0	0	0	0	0	0	0	0	0	0	0	0	0	0	0
1133452	4	3739468	.	.	.	.	ADRA2C	adrenergic, alpha-2C-, receptor	Nonsynon	0.87	The Adrenergic System	0	1	3.55	0	0	0	0	0	0	0	0	0	0	0	0	0	0	0	0	0	0	0	0	0	0	0	0	0	0	0	0	0	0	0	0	0	0	0
1800037	4	3739244	.	.	.	.	ADRA2C	adrenergic, alpha-2C-, receptor	Nonsynon	0.87	The Adrenergic System	0	1	3.55	0	0	0	0	0	0	0	0	0	0	0	0	0	0	0	0	0	0	0	0	0	0	0	0	0	0	0	0	0	0	0	0	0	0	0
7222276	17	46008351	.	.	.	.	CACNA1G	calcium channel, voltage-dependent, T type, alpha 1G subunit	Nonsynon	0.87	Special	0	1	3.55	0	0	0	0	0	0	0	0	0	0	0	0	0	0	0	0	0	0	0	0	0	0	0	0	0	0	0	0	0	0	0	0	0	0	0
8192535	11	17750086	.	.	.	.	KCNC1	potassium voltage-gated channel, Shaw-related subfamily, member 1	Nonsynon	0.87	Special	0	1	3.55	0	0	0	0	0	0	0	0	0	0	0	0	0	0	0	0	0	0	0	0	0	0	0	0	0	0	0	0	0	0	0	0	0	0	0
12806830	11	17750319	0	0	0	0	KCNC1	potassium voltage-gated channel, Shaw-related subfamily, member 1	Nonsynon	0.87	Special	0	1	3.55	0	0	0	0	0	0	0	0	0	0	0	0	0	0	0	0	0	0	0	0	0	0	0	0	0	0	0	0	0	0	0	0	0	0	0
17838626	2	233115945	.	.	.	.	CHRNG	cholinergic receptor, nicotinic, gamma	Nonsynon	0.87	The Nicotine System	0	1	3.55	1	0	0	0	0	0	0	0	0	0	0	0	0	0	0	0	0	0	0	0	0	0	0	0	0	0	0	0	0	0	0	0	0	0	0
17852014	4	47122653	.	.	.	.	GABRB1	gamma-aminobutyric acid (GABA) A receptor, beta 1	Nonsynon	0.87	The GABA System	0	1	3.55	0	0	0	0	0	0	0	0	0	0	0	0	0	0	0	0	0	0	0	0	0	0	0	0	0	0	0	0	0	0	0	0	0	0	0
34208698	4	47122753	.	.	.	.	GABRB1	gamma-aminobutyric acid (GABA) A receptor, beta 1	Nonsynon	0.87	The GABA System	0	1	3.55	0	0	0	0	0	0	0	0	0	0	0	0	0	0	0	0	0	0	0	0	0	0	0	0	0	0	0	0	0	0	0	0	0	0	0
41298406	5	160690485	.	.	.	.	GABRB2	gamma-aminobutyric acid (GABA) A receptor, beta 2	Nonsynon	0.87	The GABA System	0	1	3.55	0	0	0	0	0	0	0	0	0	0	0	0	0	0	0	0	0	0	0	0	0	0	0	0	0	0	0	0	0	0	0	0	0	0	0
41311286	4	47122630	.	.	.	.	GABRB1	gamma-aminobutyric acid (GABA) A receptor, beta 1	Nonsynon	0.87	The GABA System	0	1	3.55	0	0	0	0	0	0	0	0	0	0	0	0	0	0	0	0	0	0	0	0	0	0	0	0	0	0	0	0	0	0	0	0	0	0	0
1803640	10	88801103	.	.	.	.	GLUD1	glutamate dehydrogenase 1	mRNA-UTR	0.76	The Glutamatergic System	1	6	3.54	0	0	0	0	0	0	0	0	0	0	0	0	0	0	0	0	0	0	0	0	0	0	0	0	0	0	0	0	0	0	0	0	0	0	0
2317676	17	42743282	0.052	0.227	0.144	0.175	ITGB3	integrin, beta 3 (platelet glycoprotein IIIa, antigen CD61)	mRNA-UTR	0.76	Special	1	6	3.54	0	0	0	0	0	0	0	0	1	1	1	1	0	1	1	1	0	1	1	1	0	1	1	1	0	1	1	1	0	1	1	1	0	1	1
3809865	17	42743585	0.345	0.2	0.261	0.373	ITGB3	integrin, beta 3 (platelet glycoprotein IIIa, antigen CD61)	mRNA-UTR	0.76	Special	1	6	3.54	0	0	0	0	0	0	0	0	0	1	1	1	0	1	1	1	1	1	1	1	0	1	1	1	0	1	1	1	0	1	1	1	0	1	1
16941864	17	42743240	.	.	.	.	ITGB3	integrin, beta 3 (platelet glycoprotein IIIa, antigen CD61)	mRNA-UTR	0.76	Special	1	6	3.54	0	0	0	0	0	0	0	0	0	0	0	0	0	0	0	0	0	0	0	0	0	0	0	0	0	0	0	0	0	0	0	0	0	0	0
17225109	17	42743208	.	.	.	.	ITGB3	integrin, beta 3 (platelet glycoprotein IIIa, antigen CD61)	mRNA-UTR	0.76	Special	1	6	3.54	0	0	0	0	0	0	0	0	0	0	0	0	0	0	0	0	0	0	0	0	0	0	0	0	0	0	0	0	0	0	0	0	0	0	0
41482350	17	42743754	.	.	.	.	ITGB3	integrin, beta 3 (platelet glycoprotein IIIa, antigen CD61)	mRNA-UTR	0.76	Special	1	6	3.54	0	0	0	0	0	0	0	0	0	0	0	0	0	0	0	0	0	0	0	0	0	0	0	0	0	0	0	0	0	0	0	0	0	0	0
731506	7	150302917	0	0	0	0	KCNH2	potassium voltage-gated channel, subfamily H (eag-related), member 2	Nonsynon	0.86	Special	0	1	3.54	0	0	0	0	0	0	0	0	1	0	0	0	0	0	0	0	0	0	0	0	0	0	0	0	0	0	0	0	0	0	0	0	0	1	1
1042500	15	76670002	.	.	.	.	CHRNA5	cholinergic receptor, nicotinic, alpha 5	Nonsynon	0.86	The Nicotine System	0	1	3.54	0	0	0	0	0	0	0	0	0	0	0	0	0	0	0	0	0	0	0	0	0	0	0	0	0	0	0	0	0	0	0	0	0	0	0
1044801	22	24291025	.	.	.	.	ADRBK2	adrenergic, beta, receptor kinase 2	Synon	0.86	The Adrenergic System	0	4	3.54	0	0	0	0	0	0	0	0	0	0	0	0	0	0	0	0	0	0	0	0	0	0	0	0	0	0	0	0	0	0	0	0	0	0	0
2032892	5	36712840	0.017	0	0.011	0.059	SLC1A3	solute carrier family 1 (glial high affinity glutamate transporter), member 3	Nonsynon	0.86	The Glutamatergic System	0	1	3.54	0	0	1	1	0	0	0	0	1	1	1	1	1	1	1	1	1	0	0	0	0	0	0	0	0	0	0	0	0	0	0	0	1	1	1
2241694	5	149582801	0.083	0.189	0.122	0	CAMK2A	calcium/calmodulin-dependent protein kinase (CaM kinase) II alpha	Synon	0.86	Special	0	4	3.54	0	0	0	0	1	1	1	1	1	1	1	1	0	1	1	1	0	1	1	1	1	1	1	1	1	1	1	1	1	1	1	1	1	1	1
6069986	20	34587776	0	0	0	0	DLGAP4	discs, large (Drosophila) homolog-associated protein 4	Nonsynon	0.86	Special	0	1	3.54	0	0	0	0	0	0	0	0	0	0	0	0	0	0	0	0	0	0	0	0	0	0	0	0	0	0	0	0	0	0	0	0	0	0	0
16969968	15	76669980	0.424	0.033	0.011	0	CHRNA5	cholinergic receptor, nicotinic, alpha 5	Nonsynon	0.86	The Nicotine System	0	1	3.54	1	0	0	0	0	0	0	0	1	1	0	0	0	1	0	0	0	1	0	0	0	1	0	0	0	1	0	0	0	1	0	0	0	1	1
17855003	5	161508839	.	.	.	.	GABRG2	gamma-aminobutyric acid (GABA) A receptor, gamma 2	Nonsynon	0.86	The GABA System	0	1	3.54	0	0	0	0	0	0	0	0	0	0	0	0	0	0	0	0	0	0	0	0	0	0	0	0	0	0	0	0	0	0	0	0	0	0	0
28369912	1	169444563	.	.	.	.	FMO2	flavin containing monooxygenase 2 (non-functional)	Synon	0.86	The Nicotine Metabolism System	0	4	3.54	0	0	0	0	0	0	0	0	0	0	0	0	0	0	0	0	0	0	0	0	0	0	0	0	0	0	0	0	0	0	0	0	0	0	0
34897046	4	56020122	.	.	.	.	CLOCK	clock homolog (mouse)	Nonsynon	0.86	Special	0	1	3.54	0	0	0	0	0	0	0	0	0	0	0	0	0	0	0	0	0	0	0	0	0	0	0	0	0	0	0	0	0	0	0	0	0	0	0
35452727	7	44232709	.	.	.	.	CAMK2B	calcium/calmodulin-dependent protein kinase (CaM kinase) II beta	Nonsynon	0.86	Special	0	1	3.54	0	0	0	0	0	0	0	0	0	0	0	0	0	0	0	0	0	0	0	0	0	0	0	0	0	0	0	0	0	0	0	0	0	0	0
41274714	20	34562165	.	.	.	.	DLGAP4	discs, large (Drosophila) homolog-associated protein 4	Nonsynon	0.86	Special	0	1	3.54	0	0	0	0	0	0	0	0	0	0	0	0	0	0	0	0	0	0	0	0	0	0	0	0	0	0	0	0	0	0	0	0	0	0	0
41287120	5	149582816	.	.	.	.	CAMK2A	calcium/calmodulin-dependent protein kinase (CaM kinase) II alpha	Synon	0.86	Special	0	4	3.54	0	0	0	0	0	0	0	0	0	0	0	0	0	0	0	0	0	0	0	0	0	0	0	0	0	0	0	0	0	0	0	0	0	0	0
41312276	4	46661938	.	.	.	.	GABRA4	gamma-aminobutyric acid (GABA) A receptor, alpha 4	Nonsynon	0.86	The GABA System	0	1	3.54	0	0	0	0	0	0	0	0	0	0	0	0	0	0	0	0	0	0	0	0	0	0	0	0	0	0	0	0	0	0	0	0	0	0	0
45546331	4	46661815	.	.	.	.	GABRA4	gamma-aminobutyric acid (GABA) A receptor, alpha 4	Nonsynon	0.86	The GABA System	0	1	3.54	0	0	0	0	0	0	0	0	0	0	0	0	0	0	0	0	0	0	0	0	0	0	0	0	0	0	0	0	0	0	0	0	0	0	0
12980	10	88800516	.	.	.	.	GLUD1	glutamate dehydrogenase 1	mRNA-UTR	0.75	The Glutamatergic System	1	6	3.53	0	0	0	0	0	0	0	0	0	0	0	0	0	0	0	0	0	0	0	0	0	0	0	0	0	0	0	0	0	0	0	0	0	0	0
1050306	10	88800479	.	.	.	.	GLUD1	glutamate dehydrogenase 1	mRNA-UTR	0.75	The Glutamatergic System	1	6	3.53	0	0	0	0	0	0	0	0	0	0	0	0	0	0	0	0	0	0	0	0	0	0	0	0	0	0	0	0	0	0	0	0	0	0	0
1050319	10	88800466	.	.	.	.	GLUD1	glutamate dehydrogenase 1	mRNA-UTR	0.75	The Glutamatergic System	1	6	3.53	0	0	0	0	0	0	0	0	0	0	0	0	0	0	0	0	0	0	0	0	0	0	0	0	0	0	0	0	0	0	0	0	0	0	0
1050340	10	88800401	.	.	.	.	GLUD1	glutamate dehydrogenase 1	mRNA-UTR	0.75	The Glutamatergic System	1	6	3.53	0	0	0	0	0	0	0	0	0	0	0	0	0	0	0	0	0	0	0	0	0	0	0	0	0	0	0	0	0	0	0	0	0	0	0
1050359	10	88800340	.	.	.	.	GLUD1	glutamate dehydrogenase 1	mRNA-UTR	0.75	The Glutamatergic System	1	6	3.53	0	0	0	0	0	0	0	0	0	0	0	0	0	0	0	0	0	0	0	0	0	0	0	0	0	0	0	0	0	0	0	0	0	0	0
3190657	10	88800308	.	.	.	.	GLUD1	glutamate dehydrogenase 1	mRNA-UTR	0.75	The Glutamatergic System	1	6	3.53	0	0	0	0	0	0	0	0	0	0	0	0	0	0	0	0	0	0	0	0	0	0	0	0	0	0	0	0	0	0	0	0	0	0	0
11548293	10	88800513	.	.	.	.	GLUD1	glutamate dehydrogenase 1	mRNA-UTR	0.75	The Glutamatergic System	1	6	3.53	0	0	0	0	0	0	0	0	0	0	0	0	0	0	0	0	0	0	0	0	0	0	0	0	0	0	0	0	0	0	0	0	0	0	0
2073478	9	38386065	0.408	0.322	0.386	0.241	ALDH1B1	aldehyde dehydrogenase 1 family, member B1	Nonsynon	0.85	The Alcohol System	0	1	3.53	0	0	0	1	1	1	1	1	1	0	0	0	0	1	1	1	1	1	1	1	1	1	1	1	1	1	1	1	1	1	1	1	1	1	1
2228093	9	38386002	0.207	0.444	0.307	0.102	ALDH1B1	aldehyde dehydrogenase 1 family, member B1	Nonsynon	0.85	The Alcohol System	0	1	3.53	0	0	0	0	0	0	0	0	1	0	0	0	0	0	0	0	0	0	0	0	0	0	0	0	0	0	0	0	0	0	0	0	0	1	1
2839672	10	26548149	.	.	.	.	GAD2	glutamate decarboxylase 2 (pancreatic islets and brain, 65kDa)	Nonsynon	0.85	The Glutamatergic System	0	1	3.53	0	0	0	0	0	0	0	0	0	0	0	0	0	0	0	0	0	0	0	0	0	0	0	0	0	0	0	0	0	0	0	0	0	0	0
4646773	9	38386350	0	0	0	0	ALDH1B1	aldehyde dehydrogenase 1 family, member B1	Nonsynon	0.85	The Alcohol System	0	1	3.53	0	0	0	0	0	0	0	0	1	0	0	0	0	0	0	0	0	0	0	0	0	0	0	0	0	0	0	0	0	0	0	0	0	1	1
4878199	9	38386502	0.05	0	0	0.169	ALDH1B1	aldehyde dehydrogenase 1 family, member B1	Nonsynon	0.85	The Alcohol System	0	1	3.53	0	0	0	1	1	1	1	1	1	0	0	0	0	1	1	1	1	1	1	1	1	1	1	1	1	1	1	1	1	1	1	1	1	1	1
5820827	17	46058576	.	.	.	.	CACNA1G	calcium channel, voltage-dependent, T type, alpha 1G subunit	Nonsynon	0.85	Special	0	1	3.53	0	0	0	0	0	0	0	0	0	0	0	0	0	0	0	0	0	0	0	0	0	0	0	0	0	0	0	0	0	0	0	0	0	0	0
7814596	8	145137568	.	.	.	.	GRINA	glutamate receptor, ionotropic, N-methyl D-asparate-associated protein 1 (glutamate binding)	Synon	0.85	The Glutamatergic System	0	4	3.53	0	0	0	0	0	0	0	0	0	0	0	0	0	0	0	0	0	0	0	0	0	0	0	0	0	0	0	0	0	0	0	0	0	0	0
8190600	10	26548063	0	0	0	0	GAD2	glutamate decarboxylase 2 (pancreatic islets and brain, 65kDa)	Nonsynon	0.85	The Glutamatergic System	0	1	3.53	0	0	0	0	0	0	0	0	1	0	0	0	0	0	0	0	0	0	0	0	0	0	0	0	0	0	0	0	0	0	0	0	0	1	1
11555705	9	38385815	.	.	.	.	ALDH1B1	aldehyde dehydrogenase 1 family, member B1	Nonsynon	0.85	The Alcohol System	0	1	3.53	0	0	0	0	0	0	0	0	0	0	0	0	0	0	0	0	0	0	0	0	0	0	0	0	0	0	0	0	0	0	0	0	0	0	0
35730401	17	46058748	.	.	.	.	CACNA1G	calcium channel, voltage-dependent, T type, alpha 1G subunit	Nonsynon	0.85	Special	0	1	3.53	0	0	0	0	0	0	0	0	0	0	0	0	0	0	0	0	0	0	0	0	0	0	0	0	0	0	0	0	0	0	0	0	0	0	0
35834548	14	37749108	.	.	.	.	SSTR1	somatostatin receptor 1	Nonsynon	0.85	Special	0	1	3.53	0	0	0	0	0	0	0	0	0	0	0	0	0	0	0	0	0	0	0	0	0	0	0	0	0	0	0	0	0	0	0	0	0	0	0
35932521	7	119702318	.	.	.	.	KCND2	potassium voltage-gated channel, Shal-related subfamily, member 2	Nonsynon	0.85	Special	0	1	3.53	0	0	0	0	0	0	0	0	0	0	0	0	0	0	0	0	0	0	0	0	0	0	0	0	0	0	0	0	0	0	0	0	0	0	0
35950053	7	119701955	.	.	.	.	KCND2	potassium voltage-gated channel, Shal-related subfamily, member 2	Nonsynon	0.85	Special	0	1	3.53	0	0	0	0	0	0	0	0	0	0	0	0	0	0	0	0	0	0	0	0	0	0	0	0	0	0	0	0	0	0	0	0	0	0	0
12816	1	59019246	.	.	.	.	JUN	jun oncogene	mRNA-UTR	0.74	Goldman Gene	1	7	3.52	0	0	0	0	0	0	0	0	0	0	0	0	0	0	0	0	0	0	0	0	0	0	0	0	0	0	0	0	0	0	0	0	0	0	0
1051452	17	42742610	.	.	.	.	ITGB3	integrin, beta 3 (platelet glycoprotein IIIa, antigen CD61)	mRNA-UTR	0.74	Special	1	6	3.52	0	0	0	0	0	0	0	0	0	0	0	0	0	0	0	0	0	0	0	0	0	0	0	0	0	0	0	0	0	0	0	0	0	0	0
1923942	1	59019214	.	.	.	.	JUN	jun oncogene	mRNA-UTR	0.74	Goldman Gene	1	7	3.52	0	0	0	0	0	0	0	0	0	0	0	0	0	0	0	0	0	0	0	0	0	0	0	0	0	0	0	0	0	0	0	0	0	0	0
4647017	1	59019404	.	.	.	.	JUN	jun oncogene	mRNA-UTR	0.74	Goldman Gene	1	7	3.52	0	0	0	0	0	0	0	0	0	0	0	0	0	0	0	0	0	0	0	0	0	0	0	0	0	0	0	0	0	0	0	0	0	0	0
4647018	1	59019169	.	.	.	.	JUN	jun oncogene	mRNA-UTR	0.74	Goldman Gene	1	7	3.52	0	0	0	0	0	0	0	0	0	0	0	0	0	0	0	0	0	0	0	0	0	0	0	0	0	0	0	0	0	0	0	0	0	0	0
6262	7	50563414	0	0	0	0.05	DDC	dopa decarboxylase (aromatic L-amino acid decarboxylase)	Nonsynon	0.84	Dopamine Synthesis	0	1	3.52	1	0	0	0	0	0	0	0	1	0	0	0	0	0	0	0	1	0	0	0	0	0	0	0	0	0	0	0	0	0	0	0	1	1	1
6263	7	50563394	0.034	0.089	0.091	0.05	DDC	dopa decarboxylase (aromatic L-amino acid decarboxylase)	Nonsynon	0.84	Dopamine Synthesis	0	1	3.52	1	1	0	0	0	0	0	0	1	0	0	0	0	0	0	0	1	0	0	0	0	0	1	1	0	0	1	1	0	0	1	1	1	1	1
1044848	1	145139490	0	0	0	0	FMO5	flavin containing monooxygenase 5	Nonsynon	0.84	The Nicotine Metabolism System	0	1	3.52	0	0	0	0	0	0	1	0	1	0	0	0	0	0	0	0	0	0	0	0	0	0	0	0	0	1	1	1	1	0	0	0	0	1	1
3025694	16	3760668	0	.	.	0.008	CREBBP	CREB binding protein (Rubinstein-Taybi syndrome)	Synon	0.84	Special	0	4	3.52	0	0	0	0	0	0	0	0	0	0	0	0	0	0	0	0	0	0	0	0	0	0	0	0	0	0	0	0	0	0	0	0	0	0	0
3739757	9	13209593	0	0	0.023	0	MPDZ	multiple PDZ domain protein	Nonsynon	0.84	Goldman Gene	0	1	3.52	0	0	0	0	0	0	0	0	0	0	0	0	0	0	0	0	0	0	0	0	0	0	0	0	0	0	0	0	0	0	0	0	0	0	0
3747154	22	30003116	.	.	.	.	LIMK2	LIM domain kinase 2	Nonsynon	0.84	Special	0	1	3.52	0	0	0	0	0	0	0	0	0	0	0	0	0	0	0	0	0	0	0	0	0	0	0	0	0	0	0	0	0	0	0	0	0	0	0
9333649	7	150279700	.	.	.	.	KCNH2	potassium voltage-gated channel, subfamily H (eag-related), member 2	Nonsynon	0.84	Special	0	1	3.52	0	0	0	0	0	0	0	0	0	0	0	0	0	0	0	0	0	0	0	0	0	0	0	0	0	0	0	0	0	0	0	0	0	0	0
11550149	11	65379992	.	.	.	.	CFL1	cofilin 1 (non-muscle)	Nonsynon	0.84	Special	0	1	3.52	0	0	0	0	0	0	0	0	0	0	0	0	0	0	0	0	0	0	0	0	0	0	0	0	0	0	0	0	0	0	0	0	0	0	0
11550151	11	65380051	0	0	0	0	CFL1	cofilin 1 (non-muscle)	Nonsynon	0.84	Special	0	1	3.52	0	0	0	0	0	0	0	0	0	0	0	0	0	0	0	0	0	0	0	0	0	0	0	0	0	0	0	0	0	0	0	0	0	0	0
11550152	11	65380105	.	.	.	.	CFL1	cofilin 1 (non-muscle)	Nonsynon	0.84	Special	0	1	3.52	0	0	0	0	0	0	0	0	0	0	0	0	0	0	0	0	0	0	0	0	0	0	0	0	0	0	0	0	0	0	0	0	0	0	0
11550156	11	65380103	.	.	.	.	CFL1	cofilin 1 (non-muscle)	Nonsynon	0.84	Special	0	1	3.52	0	0	0	0	0	0	0	0	0	0	0	0	0	0	0	0	0	0	0	0	0	0	0	0	0	0	0	0	0	0	0	0	0	0	0
11550157	11	65380200	.	.	.	.	CFL1	cofilin 1 (non-muscle)	Nonsynon	0.84	Special	0	1	3.52	0	0	0	0	0	0	0	0	0	0	0	0	0	0	0	0	0	0	0	0	0	0	0	0	0	0	0	0	0	0	0	0	0	0	0
11550158	11	65380088	.	.	.	.	CFL1	cofilin 1 (non-muscle)	Nonsynon	0.84	Special	0	1	3.52	0	0	0	0	0	0	0	0	0	0	0	0	0	0	0	0	0	0	0	0	0	0	0	0	0	0	0	0	0	0	0	0	0	0	0
11550160	11	65380054	.	0	0	0	CFL1	cofilin 1 (non-muscle)	Nonsynon	0.84	Special	0	1	3.52	0	0	0	0	0	0	0	0	0	0	0	0	0	0	0	0	0	0	0	0	0	0	0	0	0	0	0	0	0	0	0	0	0	0	0
11550161	11	65380003	.	.	.	.	CFL1	cofilin 1 (non-muscle)	Nonsynon	0.84	Special	0	1	3.52	0	0	0	0	0	0	0	0	0	0	0	0	0	0	0	0	0	0	0	0	0	0	0	0	0	0	0	0	0	0	0	0	0	0	0
11556298	16	74168701	.	.	.	.	GABARAPL2	GABA(A) receptor-associated protein-like 2	Nonsynon	0.84	The GABA System	0	1	3.52	0	0	0	0	0	0	0	0	0	0	0	0	0	0	0	0	0	0	0	0	0	0	0	0	0	0	0	0	0	0	0	0	0	0	0
12160336	22	30003000	0	0	0	0	LIMK2	LIM domain kinase 2	Nonsynon	0.84	Special	0	1	3.52	0	0	0	0	0	0	0	0	0	0	0	0	0	0	0	0	0	0	0	0	0	0	0	0	0	0	0	0	0	0	0	0	0	0	0
28928904	7	150279636	.	.	.	.	KCNH2	potassium voltage-gated channel, subfamily H (eag-related), member 2	Nonsynon	0.84	Special	0	1	3.52	0	0	0	0	0	0	0	0	0	0	0	0	0	0	0	0	0	0	0	0	0	0	0	0	0	0	0	0	0	0	0	0	0	0	0
34911705	9	13209603	.	.	.	.	MPDZ	multiple PDZ domain protein	Nonsynon	0.84	Goldman Gene	0	1	3.52	0	0	0	0	0	0	0	0	0	0	0	0	0	0	0	0	0	0	0	0	0	0	0	0	0	0	0	0	0	0	0	0	0	0	0
35432835	17	62457533	.	.	.	.	CACNG4	calcium channel, voltage-dependent, gamma subunit 4	Nonsynon	0.84	Special	0	1	3.52	0	0	0	0	0	0	0	0	0	0	0	0	0	0	0	0	0	0	0	0	0	0	0	0	0	0	0	0	0	0	0	0	0	0	0
35599906	11	120316371	.	.	.	.	GRIK4	glutamate receptor, ionotropic, kainate 4	Nonsynon	0.84	The Glutamatergic System	0	1	3.52	0	0	0	0	0	0	0	0	0	0	0	0	0	0	0	0	0	0	0	0	0	0	0	0	0	0	0	0	0	0	0	0	0	0	0
41307270	7	150275064	.	.	.	.	KCNH2	potassium voltage-gated channel, subfamily H (eag-related), member 2	Nonsynon	0.84	Special	0	1	3.52	0	0	0	0	0	0	0	0	0	0	0	0	0	0	0	0	0	0	0	0	0	0	0	0	0	0	0	0	0	0	0	0	0	0	0
41313752	7	150275055	.	.	.	.	KCNH2	potassium voltage-gated channel, subfamily H (eag-related), member 2	Nonsynon	0.84	Special	0	1	3.52	0	0	0	0	0	0	0	0	0	0	0	0	0	0	0	0	0	0	0	0	0	0	0	0	0	0	0	0	0	0	0	0	0	0	0
293795	3	9774113	0.149	0.1	0.023	0.328	CAMK1	calcium/calmodulin-dependent protein kinase I	mRNA-UTR	0.73	Special	1	9	3.52	0	0	0	0	0	0	0	0	1	0	0	0	0	0	1	0	0	1	1	0	0	1	1	0	0	1	1	0	0	1	1	0	0	1	1
10097505	8	143691186	0.483	0.467	0.193	0.358	ARC	activity-regulated cytoskeleton-associated protein	mRNA-UTR	0.73	Special	1	6	3.52	0	0	0	0	1	1	1	1	1	0	0	0	0	1	0	0	0	1	1	1	1	1	1	1	1	1	1	1	1	1	1	1	1	1	1
6301	3	88123372	.	.	.	.	HTR1F	5-hydroxytryptamine (serotonin) receptor 1F	Synon	0.83	The Serotonergic System	0	4	3.51	0	0	0	0	0	0	0	0	0	0	0	0	0	0	0	0	0	0	0	0	0	0	0	0	0	0	0	0	0	0	0	0	0	0	0
1042315	12	50735163	.	.	.	.	NR4A1	nuclear receptor subfamily 4, group A, member 1	Nonsynon	0.83	Special	0	1	3.51	0	0	0	0	0	0	0	0	0	0	0	0	0	0	0	0	0	0	0	0	0	0	0	0	0	0	0	0	0	0	0	0	0	0	0
1042316	12	50735164	.	.	.	.	NR4A1	nuclear receptor subfamily 4, group A, member 1	Nonsynon	0.83	Special	0	1	3.51	0	0	0	0	0	0	0	0	0	0	0	0	0	0	0	0	0	0	0	0	0	0	0	0	0	0	0	0	0	0	0	0	0	0	0
1052540	23	122427238	0	0	0	0	GRIA3	glutamate receptor, ionotrophic, AMPA 3	Nonsynon	0.83	The Glutamatergic System	0	1	3.51	0	0	0	0	0	0	0	0	0	0	0	0	0	0	0	0	0	0	0	0	0	0	0	0	0	0	0	0	0	0	0	0	0	0	0
1052542	23	122427249	0	0	0	0	GRIA3	glutamate receptor, ionotrophic, AMPA 3	Nonsynon	0.83	The Glutamatergic System	0	1	3.51	0	0	0	0	0	0	0	0	0	0	0	0	0	0	0	0	0	0	0	0	0	0	0	0	0	0	0	0	0	0	0	0	0	0	0
1056478	4	56014046	0	0	0	0	CLOCK	clock homolog (mouse)	Nonsynon	0.83	Special	0	1	3.51	0	0	0	0	0	0	0	0	0	0	0	0	0	0	0	0	0	0	0	0	0	0	0	0	0	0	0	0	0	0	0	0	0	0	0
1800020	3	88123117	.	.	.	.	HTR1F	5-hydroxytryptamine (serotonin) receptor 1F	Synon	0.83	The Serotonergic System	0	4	3.51	0	0	0	0	0	0	0	0	0	0	0	0	0	0	0	0	0	0	0	0	0	0	0	0	0	0	0	0	0	0	0	0	0	0	0
1805004	11	6248134	.	.	.	.	CCKBR	cholecystokinin B receptor	Nonsynon	0.83	Goldman Gene	0	1	3.51	0	0	0	0	0	0	0	0	0	0	0	0	0	0	0	0	0	0	0	0	0	0	0	0	0	0	0	0	0	0	0	0	0	0	0
2067481	1	238137567	0.025	0	0	0	CHRM3	cholinergic receptor, muscarinic 3	Nonsynon	0.83	The Cholinergic System	0	1	3.51	0	1	0	0	0	0	0	0	1	0	0	0	0	0	0	0	0	0	0	0	0	0	0	0	0	0	0	0	0	0	0	0	0	1	1
2072381	16	3721314	0	0.144	0.078	0	CREBBP	CREB binding protein (Rubinstein-Taybi syndrome)	Synon	0.83	Special	0	4	3.51	0	0	1	1	0	0	0	0	0	1	1	1	1	1	1	1	1	0	0	0	0	0	0	0	0	0	0	0	0	0	0	0	0	0	0
2228949	8	132121524	.	.	.	.	ADCY8	adenylate cyclase 8 (brain)	Nonsynon	0.83	Special	0	1	3.51	0	0	0	0	0	0	0	0	0	0	0	0	0	0	0	0	0	0	0	0	0	0	0	0	0	0	0	0	0	0	0	0	0	0	0
3752087	18	46444438	0.458	0.433	0.453	0.125	MAPK4	mitogen-activated protein kinase 4	Nonsynon	0.83	Special	0	1	3.51	0	0	0	0	1	1	1	1	1	0	0	0	0	1	0	0	0	1	1	1	1	1	1	1	1	1	1	1	1	1	1	1	1	1	1
4924618	15	40159044	.	.	.	.	PLA2G4D	phospholipase A2, group IVD (cytosolic)	Nonsynon	0.83	Special	0	1	3.51	0	0	0	0	0	0	0	0	0	0	0	0	0	0	0	0	0	0	0	0	0	0	0	0	0	0	0	0	0	0	0	0	0	0	0
6855837	4	56014001	0	0	0	0.302	CLOCK	clock homolog (mouse)	Nonsynon	0.83	Special	0	1	3.51	0	0	0	0	0	0	0	0	1	0	0	0	0	0	0	0	1	0	0	0	0	0	0	0	0	0	0	0	0	0	0	0	0	1	1
7815654	8	132120966	.	.	.	.	ADCY8	adenylate cyclase 8 (brain)	Nonsynon	0.83	Special	0	1	3.51	0	0	0	0	0	0	0	0	0	0	0	0	0	0	0	0	0	0	0	0	0	0	0	0	0	0	0	0	0	0	0	0	0	0	0
11550147	11	65379459	.	.	.	.	CFL1	cofilin 1 (non-muscle)	Nonsynon	0.83	Special	0	1	3.51	0	0	0	0	0	0	0	0	0	0	0	0	0	0	0	0	0	0	0	0	0	0	0	0	0	0	0	0	0	0	0	0	0	0	0
16839102	1	238138666	0	0	0	0	CHRM3	cholinergic receptor, muscarinic 3	Nonsynon	0.83	The Cholinergic System	0	1	3.51	0	1	0	0	0	0	0	0	1	0	0	0	0	0	0	0	0	0	0	0	0	0	0	0	0	0	0	0	0	0	0	0	0	1	1
34163242	17	46031817	.	.	.	.	CACNA1G	calcium channel, voltage-dependent, T type, alpha 1G subunit	Nonsynon	0.83	Special	0	1	3.51	0	0	0	0	0	0	0	0	0	0	0	0	0	0	0	0	0	0	0	0	0	0	0	0	0	0	0	0	0	0	0	0	0	0	0
34207571	18	46444376	.	.	.	.	MAPK4	mitogen-activated protein kinase 4	Nonsynon	0.83	Special	0	1	3.51	0	0	0	0	0	0	0	0	0	0	0	0	0	0	0	0	0	0	0	0	0	0	0	0	0	0	0	0	0	0	0	0	0	0	0
35083933	9	13158386	.	.	.	.	MPDZ	multiple PDZ domain protein	Nonsynon	0.83	Goldman Gene	0	1	3.51	0	0	0	0	0	0	0	0	0	0	0	0	0	0	0	0	0	0	0	0	0	0	0	0	0	0	0	0	0	0	0	0	0	0	0
41280124	17	46032026	.	.	.	.	CACNA1G	calcium channel, voltage-dependent, T type, alpha 1G subunit	Nonsynon	0.83	Special	0	1	3.51	0	0	0	0	0	0	0	0	0	0	0	0	0	0	0	0	0	0	0	0	0	0	0	0	0	0	0	0	0	0	0	0	0	0	0
45564542	12	50735294	.	.	.	.	NR4A1	nuclear receptor subfamily 4, group A, member 1	Nonsynon	0.83	Special	0	1	3.51	0	0	0	0	0	0	0	0	0	0	0	0	0	0	0	0	0	0	0	0	0	0	0	0	0	0	0	0	0	0	0	0	0	0	0
6894	11	69960277	0.333	0.189	0.056	0.017	CTTN	cortactin	mRNA-UTR	0.72	Special	1	6	3.51	0	0	0	0	1	1	1	1	1	1	1	1	0	1	1	1	0	1	1	1	1	1	1	1	1	1	1	1	1	1	1	1	1	1	1
12858	11	69959260	.	.	.	.	CTTN	cortactin	mRNA-UTR	0.72	Special	1	6	3.51	0	0	0	0	0	0	0	0	0	0	0	0	0	0	0	0	0	0	0	0	0	0	0	0	0	0	0	0	0	0	0	0	0	0	0
28420666	8	143692827	.	.	.	.	ARC	activity-regulated cytoskeleton-associated protein	mRNA-UTR	0.72	Special	1	6	3.51	0	0	0	0	0	0	0	0	0	0	0	0	0	0	0	0	0	0	0	0	0	0	0	0	0	0	0	0	0	0	0	0	0	0	0
2228101	17	15789362	0	0	0	0.142	ADORA2B	adenosine A2b receptor	Synon	0.82	Special	0	4	3.5	0	0	0	0	0	0	0	0	1	0	0	0	0	0	0	0	0	0	0	0	0	0	0	0	0	0	0	0	0	0	0	0	0	1	1
2229940	4	46690123	0.272	0.372	0.291	0.216	GABRA4	gamma-aminobutyric acid (GABA) A receptor, alpha 4	Nonsynon	0.82	The GABA System	0	1	3.5	0	0	0	0	0	0	0	0	0	1	0	1	1	1	0	1	1	1	0	1	1	1	0	1	1	1	0	1	1	1	1	1	1	1	1
3752089	18	46509570	.	.	.	.	MAPK4	mitogen-activated protein kinase 4	Nonsynon	0.82	Special	0	1	3.5	0	0	0	0	0	0	0	0	0	0	0	0	0	0	0	0	0	0	0	0	0	0	0	0	0	0	0	0	0	0	0	0	0	0	0
3925597	9	5116414	0	0	0	0	JAK2	Janus kinase 2 (a protein tyrosine kinase)	Nonsynon	0.82	Special	0	1	3.5	0	0	0	0	0	0	0	0	0	0	0	0	0	0	0	0	0	0	0	0	0	0	0	0	0	0	0	0	0	0	0	0	0	0	0
4938063	11	113362502	0	0	0	0	HTR3A	5-hydroxytryptamine (serotonin) receptor 3A	Nonsynon	0.82	The Serotonergic System	0	1	3.5	0	0	0	0	0	0	0	0	1	0	0	0	0	0	0	0	0	0	0	0	0	0	0	0	0	0	0	0	0	0	0	0	0	1	1
6736017	2	231681660	0	0	0	0.092	HTR2B	5-hydroxytryptamine (serotonin) receptor 2B	Nonsynon	0.82	The Serotonergic System	0	1	3.5	0	1	0	0	0	0	0	0	1	0	0	0	0	0	0	0	0	0	0	0	0	0	0	0	0	0	0	0	0	0	0	0	1	1	1
8187730	10	50490351	0	0	0	0.042	SLC18A3	solute carrier family 18 (vesicular acetylcholine), member 3	Nonsynon	0.82	The Cholinergic System	0	1	3.5	0	0	0	0	0	0	0	0	0	0	0	0	0	0	0	0	0	0	0	0	0	0	0	0	0	0	0	0	0	0	0	0	0	0	0
11538710	7	150280486	.	.	.	.	KCNH2	potassium voltage-gated channel, subfamily H (eag-related), member 2	Nonsynon	0.82	Special	0	1	3.5	0	0	0	0	0	0	0	0	0	0	0	0	0	0	0	0	0	0	0	0	0	0	0	0	0	0	0	0	0	0	0	0	0	0	0
11564176	12	39002106	0	0	0	0	LRRK2	leucine-rich repeat kinase 2	Nonsynon	0.82	Special	0	1	3.5	0	0	0	0	0	0	0	0	1	0	0	0	0	0	0	0	0	0	0	0	0	0	0	0	0	0	0	0	0	0	0	0	0	1	1
11575874	7	154493585	.	.	.	.	HTR5A	5-hydroxytryptamine (serotonin) receptor 5A	Nonsynon	0.82	The Serotonergic System	0	1	3.5	0	0	0	0	0	0	0	0	0	0	0	0	0	0	0	0	0	0	0	0	0	0	0	0	0	0	0	0	0	0	0	0	0	0	0
12581902	12	39036195	0	0	0	0	LRRK2	leucine-rich repeat kinase 2	Nonsynon	0.82	Special	0	1	3.5	0	0	0	0	0	0	0	0	0	0	0	0	0	0	0	0	0	0	0	0	0	0	0	0	0	0	0	0	0	0	0	0	0	0	0
12914008	15	76710560	0.033	0	0	0	CHRNB4	cholinergic receptor, nicotinic, beta 4	Nonsynon	0.82	The Nicotine System	0	1	3.5	1	0	0	0	0	0	0	0	0	0	0	0	0	0	0	0	0	0	0	0	0	0	0	0	0	0	0	0	0	0	0	0	0	0	0
12941185	17	46050668	0	0	0	0	CACNA1G	calcium channel, voltage-dependent, T type, alpha 1G subunit	Nonsynon	0.82	Special	0	1	3.5	0	0	0	0	0	0	0	0	1	0	0	0	0	0	0	0	0	0	0	0	0	0	0	0	0	0	0	0	0	0	0	0	0	1	1
16859837	4	46690144	0	0	0	0.034	GABRA4	gamma-aminobutyric acid (GABA) A receptor, alpha 4	Nonsynon	0.82	The GABA System	0	1	3.5	0	1	0	0	0	0	0	0	1	0	0	0	0	0	0	0	0	0	0	0	0	0	0	0	0	0	0	0	0	0	0	0	0	1	1
17852405	1	201401452	.	.	.	.	ADORA1	adenosine A1 receptor	Nonsynon	0.82	Special	0	1	3.5	0	0	0	0	0	0	0	0	0	0	0	0	0	0	0	0	0	0	0	0	0	0	0	0	0	0	0	0	0	0	0	0	0	0	0
17855781	2	231681491	0	0	0	0	HTR2B	5-hydroxytryptamine (serotonin) receptor 2B	Nonsynon	0.82	The Serotonergic System	0	1	3.5	0	0	0	0	0	0	0	0	0	0	0	0	0	0	0	0	0	0	0	0	0	0	0	0	0	0	0	0	0	0	0	0	0	0	0
28928905	7	150280535	.	.	.	.	KCNH2	potassium voltage-gated channel, subfamily H (eag-related), member 2	Nonsynon	0.82	Special	0	1	3.5	0	0	0	0	0	0	0	0	0	0	0	0	0	0	0	0	0	0	0	0	0	0	0	0	0	0	0	0	0	0	0	0	0	0	0
28934876	11	118476316	.	.	.	.	DPAGT1	dolichyl-phosphate (UDP-N-acetylglucosamine) N-acetylglucosaminephosphotransferase 1 (GlcNAc-1-P transferase)	Nonsynon	0.82	Special	0	1	3.5	0	0	0	0	0	0	0	0	0	0	0	0	0	0	0	0	0	0	0	0	0	0	0	0	0	0	0	0	0	0	0	0	0	0	0
34044530	20	34558722	.	.	.	.	DLGAP4	discs, large (Drosophila) homolog-associated protein 4	Nonsynon	0.82	Special	0	1	3.5	0	0	0	0	0	0	0	0	0	0	0	0	0	0	0	0	0	0	0	0	0	0	0	0	0	0	0	0	0	0	0	0	0	0	0
34217433	1	35138435	.	.	.	.	DLGAP3	discs, large (Drosophila) homolog-associated protein 3	Nonsynon	0.82	Special	0	1	3.5	0	0	0	0	0	0	0	0	0	0	0	0	0	0	0	0	0	0	0	0	0	0	0	0	0	0	0	0	0	0	0	0	0	0	0
34959050	10	50489121	.	.	.	.	SLC18A3	solute carrier family 18 (vesicular acetylcholine), member 3	Nonsynon	0.82	The Cholinergic System	0	1	3.5	0	0	0	0	0	0	0	0	0	0	0	0	0	0	0	0	0	0	0	0	0	0	0	0	0	0	0	0	0	0	0	0	0	0	0
35453754	7	154493888	.	.	.	.	HTR5A	5-hydroxytryptamine (serotonin) receptor 5A	Nonsynon	0.82	The Serotonergic System	0	1	3.5	0	0	0	0	0	0	0	0	0	0	0	0	0	0	0	0	0	0	0	0	0	0	0	0	0	0	0	0	0	0	0	0	0	0	0
35487631	7	120175101	.	.	.	.	KCND2	potassium voltage-gated channel, Shal-related subfamily, member 2	Nonsynon	0.82	Special	0	1	3.5	0	0	0	0	0	0	0	0	0	0	0	0	0	0	0	0	0	0	0	0	0	0	0	0	0	0	0	0	0	0	0	0	0	0	0
35533035	2	231681819	.	.	.	.	HTR2B	5-hydroxytryptamine (serotonin) receptor 2B	Nonsynon	0.82	The Serotonergic System	0	1	3.5	0	0	0	0	0	0	0	0	0	0	0	0	0	0	0	0	0	0	0	0	0	0	0	0	0	0	0	0	0	0	0	0	0	0	0
35613214	7	44235619	.	.	.	.	CAMK2B	calcium/calmodulin-dependent protein kinase (CaM kinase) II beta	Nonsynon	0.82	Special	0	1	3.5	0	0	0	0	0	0	0	0	0	0	0	0	0	0	0	0	0	0	0	0	0	0	0	0	0	0	0	0	0	0	0	0	0	0	0
35688758	1	35123861	.	.	.	.	DLGAP3	discs, large (Drosophila) homolog-associated protein 3	Nonsynon	0.82	Special	0	1	3.5	0	0	0	0	0	0	0	0	0	0	0	0	0	0	0	0	0	0	0	0	0	0	0	0	0	0	0	0	0	0	0	0	0	0	0
35815285	11	113362871	.	.	.	.	HTR3A	5-hydroxytryptamine (serotonin) receptor 3A	Nonsynon	0.82	The Serotonergic System	0	1	3.5	0	0	0	0	0	0	0	0	0	0	0	0	0	0	0	0	0	0	0	0	0	0	0	0	0	0	0	0	0	0	0	0	0	0	0
35996540	4	56003547	.	.	.	.	CLOCK	clock homolog (mouse)	Nonsynon	0.82	Special	0	1	3.5	0	0	0	0	0	0	0	0	0	0	0	0	0	0	0	0	0	0	0	0	0	0	0	0	0	0	0	0	0	0	0	0	0	0	0
36060462	10	50490024	.	.	.	.	SLC18A3	solute carrier family 18 (vesicular acetylcholine), member 3	Nonsynon	0.82	The Cholinergic System	0	1	3.5	0	0	0	0	0	0	0	0	0	0	0	0	0	0	0	0	0	0	0	0	0	0	0	0	0	0	0	0	0	0	0	0	0	0	0
41313405	1	110542441	.	.	.	.	SLC6A17	solute carrier family 6, member 17	Nonsynon	0.82	Neurotransmitter Transporters	0	1	3.5	0	0	0	0	0	0	0	0	0	0	0	0	0	0	0	0	0	0	0	0	0	0	0	0	0	0	0	0	0	0	0	0	0	0	0
41316003	9	5116343	.	.	.	.	JAK2	Janus kinase 2 (a protein tyrosine kinase)	Nonsynon	0.82	Special	0	1	3.5	0	0	0	0	0	0	0	0	0	0	0	0	0	0	0	0	0	0	0	0	0	0	0	0	0	0	0	0	0	0	0	0	0	0	0
45484395	10	50488877	.	.	.	.	SLC18A3	solute carrier family 18 (vesicular acetylcholine), member 3	Nonsynon	0.82	The Cholinergic System	0	1	3.5	0	0	0	0	0	0	0	0	0	0	0	0	0	0	0	0	0	0	0	0	0	0	0	0	0	0	0	0	0	0	0	0	0	0	0
45485697	15	76667807	.	.	.	.	CHRNA5	cholinergic receptor, nicotinic, alpha 5	Nonsynon	0.82	The Nicotine System	0	1	3.5	0	0	0	0	0	0	0	0	0	0	0	0	0	0	0	0	0	0	0	0	0	0	0	0	0	0	0	0	0	0	0	0	0	0	0
45600133	10	50488829	.	.	.	.	SLC18A3	solute carrier family 18 (vesicular acetylcholine), member 3	Nonsynon	0.82	The Cholinergic System	0	1	3.5	0	0	0	0	0	0	0	0	0	0	0	0	0	0	0	0	0	0	0	0	0	0	0	0	0	0	0	0	0	0	0	0	0	0	0
45604534	10	50488824	.	.	.	.	SLC18A3	solute carrier family 18 (vesicular acetylcholine), member 3	Nonsynon	0.82	The Cholinergic System	0	1	3.5	0	0	0	0	0	0	0	0	0	0	0	0	0	0	0	0	0	0	0	0	0	0	0	0	0	0	0	0	0	0	0	0	0	0	0
1407816	1	59021935	.	.	.	.	JUN	jun oncogene	mRNA-UTR	0.71	Goldman Gene	1	7	3.5	0	0	0	0	0	0	0	0	0	0	0	0	0	0	0	0	0	0	0	0	0	0	0	0	0	0	0	0	0	0	0	0	0	0	0
4647009	1	59021947	.	.	.	.	JUN	jun oncogene	mRNA-UTR	0.71	Goldman Gene	1	7	3.5	0	0	0	0	0	0	0	0	0	0	0	0	0	0	0	0	0	0	0	0	0	0	0	0	0	0	0	0	0	0	0	0	0	0	0
17055646	8	26570148	0.025	0.011	0	0.333	DPYSL2	dihydropyrimidinase-like 2	mRNA-UTR	0.71	Special	1	10	3.5	0	0	0	0	0	0	0	0	0	0	0	0	0	0	0	0	0	0	0	0	0	0	0	0	0	0	0	0	0	0	0	0	0	0	0
35852390	1	59021949	.	.	.	.	JUN	jun oncogene	mRNA-UTR	0.71	Goldman Gene	1	7	3.5	0	0	0	0	0	0	0	0	0	0	0	0	0	0	0	0	0	0	0	0	0	0	0	0	0	0	0	0	0	0	0	0	0	0	0
540825	6	154456139	0.217	0.022	0.102	0.05	OPRM1	opioid receptor, mu 1	Nonsynon	.	The Opioid System	0	3	3.5	1	0	0	1	0	0	0	0	1	1	0	1	0	1	1	1	1	1	0	1	0	1	0	1	0	1	0	1	0	1	0	1	0	1	1
1805056	6	29708083	.	.	.	.	GABBR1	gamma-aminobutyric acid (GABA) B receptor, 1	Nonsynon	.	The GABA System	0	3	3.5	0	0	0	0	0	0	0	0	0	0	0	0	0	0	0	0	0	0	0	0	0	0	0	0	0	0	0	0	0	0	0	0	0	0	0
34115267	12	70621631	.	.	.	.	TPH2	tryptophan hydroxylase 2	Nonsynon	.	The Serotonergic System	0	3	3.5	0	0	0	0	0	0	0	0	0	0	0	0	0	0	0	0	0	0	0	0	0	0	0	0	0	0	0	0	0	0	0	0	0	0	0
34235096	19	17970196	.	.	.	.	KCNN1	potassium intermediate/small conductance calcium-activated channel, subfamily N, member 1	Nonsynon	.	Special	0	3	3.5	0	0	0	0	0	0	0	0	0	0	0	0	0	0	0	0	0	0	0	0	0	0	0	0	0	0	0	0	0	0	0	0	0	0	0
35920350	19	17970171	.	.	.	.	KCNN1	potassium intermediate/small conductance calcium-activated channel, subfamily N, member 1	Nonsynon	.	Special	0	3	3.5	0	0	0	0	0	0	0	0	0	0	0	0	0	0	0	0	0	0	0	0	0	0	0	0	0	0	0	0	0	0	0	0	0	0	0
1042713	5	148186633	0.325	0.467	0.386	0.475	ADRB2	adrenergic, beta-2-, receptor, surface	Nonsynon	0.81	The Adrenergic System	0	1	3.49	0	1	0	0	1	1	1	1	1	1	0	0	0	1	0	0	0	1	1	1	1	1	1	1	1	1	1	1	1	1	1	1	1	1	1
1042714	5	148186666	0.467	0.122	0.08	0.175	ADRB2	adrenergic, beta-2-, receptor, surface	Nonsynon	0.81	The Adrenergic System	0	1	3.49	0	0	0	0	0	0	1	0	0	1	0	0	0	1	0	0	0	1	0	0	0	1	0	0	0	1	1	1	1	1	0	0	1	1	0
1064351	19	18910198	0.397	0.178	0.227	0.093	HOMER3	homer homolog 3 (Drosophila)	Synon	0.81	Special	0	4	3.49	0	0	0	0	0	0	0	0	1	0	0	0	0	0	0	0	0	1	1	1	0	1	1	1	0	1	1	1	0	1	1	1	0	1	1
1800888	5	148187078	0.008	0	0	0	ADRB2	adrenergic, beta-2-, receptor, surface	Nonsynon	0.81	The Adrenergic System	0	1	3.49	0	0	0	0	0	0	0	0	1	0	0	0	0	0	0	0	0	0	0	0	0	0	0	0	0	0	0	0	0	0	0	0	0	1	1
1805002	11	6247696	0.042	0.011	0.068	0.092	CCKBR	cholecystokinin B receptor	Nonsynon	0.81	Goldman Gene	0	1	3.49	0	1	0	0	0	0	0	0	1	0	0	0	0	0	0	0	0	0	0	0	0	0	0	0	0	0	0	0	0	0	0	1	0	1	1
2240157	19	955740	.	.	.	.	GRIN3B	glutamate receptor, ionotropic, N-methyl-D-aspartate 3B	Nonsynon	0.81	The Glutamatergic System	0	1	3.49	0	0	0	0	0	0	0	0	0	0	0	0	0	0	0	0	0	0	0	0	0	0	0	0	0	0	0	0	0	0	0	0	0	0	0
2240158	19	956230	0.408	0.122	0.122	0.417	GRIN3B	glutamate receptor, ionotropic, N-methyl-D-aspartate 3B	Nonsynon	0.81	The Glutamatergic System	0	1	3.49	0	0	0	0	1	1	1	1	1	0	0	0	0	0	0	0	0	1	1	1	1	1	1	1	1	1	1	1	1	1	1	1	1	1	1
2301833	17	46010754	.	.	.	.	CACNA1G	calcium channel, voltage-dependent, T type, alpha 1G subunit	Nonsynon	0.81	Special	0	1	3.49	0	0	0	0	0	0	0	0	0	0	0	0	0	0	0	0	0	0	0	0	0	0	0	0	0	0	0	0	0	0	0	0	0	0	0
3027177	17	7993859	0	0	0	0	PER1	period homolog 1 (Drosophila)	Nonsynon	0.81	Special	0	1	3.49	0	0	0	0	0	0	0	0	0	0	0	0	0	0	0	0	0	0	0	0	0	0	0	0	0	0	0	0	0	0	0	0	0	0	0
3027189	17	7988884	.	.	.	.	PER1	period homolog 1 (Drosophila)	Nonsynon	0.81	Special	0	1	3.49	0	0	0	0	0	0	0	0	0	0	0	0	0	0	0	0	0	0	0	0	0	0	0	0	0	0	0	0	0	0	0	0	0	0	0
3027190	17	7988869	0	0	0	0	PER1	period homolog 1 (Drosophila)	Nonsynon	0.81	Special	0	1	3.49	0	0	0	0	0	0	0	0	0	0	0	0	0	0	0	0	0	0	0	0	0	0	0	0	0	0	0	0	0	0	0	0	0	0	0
3729943	5	148187246	0	0	0	0.052	ADRB2	adrenergic, beta-2-, receptor, surface	Nonsynon	0.81	The Adrenergic System	0	1	3.49	0	1	0	1	0	0	0	0	0	0	0	0	0	1	1	1	1	0	0	0	0	0	0	0	0	0	0	0	0	0	0	0	0	0	0
4807399	19	955710	.	.	.	.	GRIN3B	glutamate receptor, ionotropic, N-methyl-D-aspartate 3B	Nonsynon	0.81	The Glutamatergic System	0	1	3.49	0	0	0	0	0	0	0	0	0	0	0	0	0	0	0	0	0	0	0	0	0	0	0	0	0	0	0	0	0	0	0	0	0	0	0
7266677	20	39226240	0	0	0	0	PLCG1	phospholipase C, gamma 1	Nonsynon	0.81	Special	0	1	3.49	0	0	0	0	0	0	0	0	0	0	0	0	0	0	0	0	0	0	0	0	0	0	0	0	0	0	0	0	0	0	0	0	0	0	0
11540741	19	18910194	.	.	.	.	HOMER3	homer homolog 3 (Drosophila)	Synon	0.81	Special	0	4	3.49	0	0	0	0	0	0	0	0	0	0	0	0	0	0	0	0	0	0	0	0	0	0	0	0	0	0	0	0	0	0	0	0	0	0	0
12978900	19	955687	.	.	.	.	GRIN3B	glutamate receptor, ionotropic, N-methyl-D-aspartate 3B	Nonsynon	0.81	The Glutamatergic System	0	1	3.49	0	0	0	0	0	0	0	0	0	0	0	0	0	0	0	0	0	0	0	0	0	0	0	0	0	0	0	0	0	0	0	0	0	0	0
17690899	15	40150304	0.125	0	0	0.042	PLA2G4D	phospholipase A2, group IVD (cytosolic)	Nonsynon	0.81	Special	0	1	3.49	0	0	0	0	0	0	0	0	0	1	0	0	0	1	0	0	0	1	0	0	0	1	0	0	0	1	0	0	0	1	0	0	0	1	0
17747505	15	40150772	0.125	0	0	0.042	PLA2G4D	phospholipase A2, group IVD (cytosolic)	Nonsynon	0.81	Special	0	1	3.49	0	0	0	0	0	0	0	0	1	1	0	0	0	1	0	0	0	1	0	0	0	1	0	0	0	1	0	0	0	1	0	0	0	1	1
17851507	5	176795742	.	.	.	.	GRK6	G protein-coupled receptor kinase 6	Nonsynon	0.81	The Adrenergic System	0	1	3.49	0	0	0	0	0	0	0	0	0	0	0	0	0	0	0	0	0	0	0	0	0	0	0	0	0	0	0	0	0	0	0	0	0	0	0
28999110	17	4745145	.	.	.	.	CHRNE	cholinergic receptor, nicotinic, epsilon	Nonsynon	0.81	The Nicotine System	0	1	3.49	0	0	0	0	0	0	0	0	0	0	0	0	0	0	0	0	0	0	0	0	0	0	0	0	0	0	0	0	0	0	0	0	0	0	0
33973603	5	148186631	.	.	.	.	ADRB2	adrenergic, beta-2-, receptor, surface	Nonsynon	0.81	The Adrenergic System	0	1	3.49	0	0	0	0	0	0	0	0	0	0	0	0	0	0	0	0	0	0	0	0	0	0	0	0	0	0	0	0	0	0	0	0	0	0	0
34203315	20	39228828	.	.	.	.	PLCG1	phospholipase C, gamma 1	Nonsynon	0.81	Special	0	1	3.49	0	0	0	0	0	0	0	0	0	0	0	0	0	0	0	0	0	0	0	0	0	0	0	0	0	0	0	0	0	0	0	0	0	0	0
34488824	22	29992072	.	.	.	.	LIMK2	LIM domain kinase 2	Nonsynon	0.81	Special	0	1	3.49	0	0	0	0	0	0	0	0	0	0	0	0	0	0	0	0	0	0	0	0	0	0	0	0	0	0	0	0	0	0	0	0	0	0	0
34688612	15	30110460	.	.	.	.	CHRNA7	cholinergic receptor, nicotinic, alpha 7	Nonsynon	0.81	The Nicotine System	0	1	3.49	0	0	0	0	0	0	0	0	0	0	0	0	0	0	0	0	0	0	0	0	0	0	0	0	0	0	0	0	0	0	0	0	0	0	0
34875793	22	29991964	.	.	.	.	LIMK2	LIM domain kinase 2	Nonsynon	0.81	Special	0	1	3.49	0	0	0	0	0	0	0	0	0	0	0	0	0	0	0	0	0	0	0	0	0	0	0	0	0	0	0	0	0	0	0	0	0	0	0
34991718	11	120178712	.	.	.	.	GRIK4	glutamate receptor, ionotropic, kainate 4	Nonsynon	0.81	The Glutamatergic System	0	1	3.49	0	0	0	0	0	0	0	0	0	0	0	0	0	0	0	0	0	0	0	0	0	0	0	0	0	0	0	0	0	0	0	0	0	0	0
35073088	8	29253554	.	.	.	.	DUSP4	dual specificity phosphatase 4	Nonsynon	0.81	Special	0	1	3.49	0	0	0	0	0	0	0	0	0	0	0	0	0	0	0	0	0	0	0	0	0	0	0	0	0	0	0	0	0	0	0	0	0	0	0
35256767	20	39225988	.	.	.	.	PLCG1	phospholipase C, gamma 1	Nonsynon	0.81	Special	0	1	3.49	0	0	0	0	0	0	0	0	0	0	0	0	0	0	0	0	0	0	0	0	0	0	0	0	0	0	0	0	0	0	0	0	0	0	0
35336948	5	148186758	.	.	.	.	ADRB2	adrenergic, beta-2-, receptor, surface	Nonsynon	0.81	The Adrenergic System	0	1	3.49	0	0	0	0	0	0	0	0	0	0	0	0	0	0	0	0	0	0	0	0	0	0	0	0	0	0	0	0	0	0	0	0	0	0	0
35351109	20	39228646	.	.	.	.	PLCG1	phospholipase C, gamma 1	Nonsynon	0.81	Special	0	1	3.49	0	0	0	0	0	0	0	0	0	0	0	0	0	0	0	0	0	0	0	0	0	0	0	0	0	0	0	0	0	0	0	0	0	0	0
35402897	4	47103501	.	.	.	.	GABRB1	gamma-aminobutyric acid (GABA) A receptor, beta 1	Nonsynon	0.81	The GABA System	0	1	3.49	0	0	0	0	0	0	0	0	0	0	0	0	0	0	0	0	0	0	0	0	0	0	0	0	0	0	0	0	0	0	0	0	0	0	0
35422808	22	29993885	.	.	.	.	LIMK2	LIM domain kinase 2	Nonsynon	0.81	Special	0	1	3.49	0	0	0	0	0	0	0	0	0	0	0	0	0	0	0	0	0	0	0	0	0	0	0	0	0	0	0	0	0	0	0	0	0	0	0
35550114	11	118476604	.	.	.	.	DPAGT1	dolichyl-phosphate (UDP-N-acetylglucosamine) N-acetylglucosaminephosphotransferase 1 (GlcNAc-1-P transferase)	Nonsynon	0.81	Special	0	1	3.49	0	0	0	0	0	0	0	0	0	0	0	0	0	0	0	0	0	0	0	0	0	0	0	0	0	0	0	0	0	0	0	0	0	0	0
35680672	5	148186898	.	.	.	.	ADRB2	adrenergic, beta-2-, receptor, surface	Nonsynon	0.81	The Adrenergic System	0	1	3.49	0	0	0	0	0	0	0	0	0	0	0	0	0	0	0	0	0	0	0	0	0	0	0	0	0	0	0	0	0	0	0	0	0	0	0
35816985	11	6247553	.	.	.	.	CCKBR	cholecystokinin B receptor	Nonsynon	0.81	Goldman Gene	0	1	3.49	0	0	0	0	0	0	0	0	0	0	0	0	0	0	0	0	0	0	0	0	0	0	0	0	0	0	0	0	0	0	0	0	0	0	0
41311009	7	150283451	.	.	.	.	KCNH2	potassium voltage-gated channel, subfamily H (eag-related), member 2	Nonsynon	0.81	Special	0	1	3.49	0	0	0	0	0	0	0	0	0	0	0	0	0	0	0	0	0	0	0	0	0	0	0	0	0	0	0	0	0	0	0	0	0	0	0
41320345	5	148187305	.	.	.	.	ADRB2	adrenergic, beta-2-, receptor, surface	Nonsynon	0.81	The Adrenergic System	0	1	3.49	0	0	0	0	0	0	0	0	0	0	0	0	0	0	0	0	0	0	0	0	0	0	0	0	0	0	0	0	0	0	0	0	0	0	0
41358746	5	148187328	.	.	.	.	ADRB2	adrenergic, beta-2-, receptor, surface	Nonsynon	0.81	The Adrenergic System	0	1	3.49	0	0	0	0	0	0	0	0	0	0	0	0	0	0	0	0	0	0	0	0	0	0	0	0	0	0	0	0	0	0	0	0	0	0	0
2857804	8	145066307	.	.	.	.	PLEC1	plectin 1, intermediate filament binding protein 500kDa	Nonsynon	0.99		1	7	3.49	0	0	0	0	0	0	0	0	0	0	0	0	0	0	0	0	0	0	0	0	0	0	0	0	0	0	0	0	0	0	0	0	0	0	0
2857808	8	145066049	.	.	.	.	PLEC1	plectin 1, intermediate filament binding protein 500kDa	Nonsynon	0.99		1	7	3.49	0	0	0	0	0	0	0	0	0	0	0	0	0	0	0	0	0	0	0	0	0	0	0	0	0	0	0	0	0	0	0	0	0	0	0
2857809	8	145065796	.	.	.	.	PLEC1	plectin 1, intermediate filament binding protein 500kDa	Nonsynon	0.99		1	7	3.49	0	0	0	0	0	0	0	0	0	0	0	0	0	0	0	0	0	0	0	0	0	0	0	0	0	0	0	0	0	0	0	0	0	0	0
2857812	8	145065331	0	0	0	0	PLEC1	plectin 1, intermediate filament binding protein 500kDa	Nonsynon	0.99		1	7	3.49	0	0	0	0	0	0	0	0	1	0	0	0	0	0	0	0	0	0	0	0	0	0	0	0	0	0	0	0	0	0	0	0	0	1	1
2857813	8	145065031	.	.	.	.	PLEC1	plectin 1, intermediate filament binding protein 500kDa	Nonsynon	0.99		1	7	3.49	0	0	0	0	0	0	0	0	0	0	0	0	0	0	0	0	0	0	0	0	0	0	0	0	0	0	0	0	0	0	0	0	0	0	0
2857816	8	145064965	.	.	.	.	PLEC1	plectin 1, intermediate filament binding protein 500kDa	Nonsynon	0.99		1	7	3.49	0	0	0	0	0	0	0	0	0	0	0	0	0	0	0	0	0	0	0	0	0	0	0	0	0	0	0	0	0	0	0	0	0	0	0
2857817	8	145064392	.	.	.	.	PLEC1	plectin 1, intermediate filament binding protein 500kDa	Nonsynon	0.99		1	7	3.49	0	0	0	0	0	0	0	0	0	0	0	0	0	0	0	0	0	0	0	0	0	0	0	0	0	0	0	0	0	0	0	0	0	0	0
2857821	8	145062987	.	.	.	.	PLEC1	plectin 1, intermediate filament binding protein 500kDa	Nonsynon	0.99		1	7	3.49	0	0	0	0	0	0	0	0	0	0	0	0	0	0	0	0	0	0	0	0	0	0	0	0	0	0	0	0	0	0	0	0	0	0	0
2857833	8	145067309	.	.	.	.	PLEC1	plectin 1, intermediate filament binding protein 500kDa	Nonsynon	0.99		1	7	3.49	0	0	0	0	0	0	0	0	0	0	0	0	0	0	0	0	0	0	0	0	0	0	0	0	0	0	0	0	0	0	0	0	0	0	0
2857834	8	145066459	0	0	0	0	PLEC1	plectin 1, intermediate filament binding protein 500kDa	Nonsynon	0.99		1	7	3.49	0	0	0	0	0	0	0	0	0	0	0	0	0	0	0	0	0	0	0	0	0	0	0	0	0	0	0	0	0	0	0	0	0	0	0
6558407	8	145067482	0	0	0	0	PLEC1	plectin 1, intermediate filament binding protein 500kDa	Nonsynon	0.99		1	7	3.49	0	0	0	0	0	0	0	0	0	0	0	0	0	0	0	0	0	0	0	0	0	0	0	0	0	0	0	0	0	0	0	0	0	0	0
7833924	8	145068017	.	.	.	.	PLEC1	plectin 1, intermediate filament binding protein 500kDa	Nonsynon	0.99		1	7	3.49	0	0	0	0	0	0	0	0	0	0	0	0	0	0	0	0	0	0	0	0	0	0	0	0	0	0	0	0	0	0	0	0	0	0	0
11555241	8	145062667	.	.	.	.	PLEC1	plectin 1, intermediate filament binding protein 500kDa	Nonsynon	0.99		1	7	3.49	0	0	0	0	0	0	0	0	0	0	0	0	0	0	0	0	0	0	0	0	0	0	0	0	0	0	0	0	0	0	0	0	0	0	0
12676664	8	145063115	.	.	.	.	PLEC1	plectin 1, intermediate filament binding protein 500kDa	Nonsynon	0.99		1	7	3.49	0	0	0	0	0	0	0	0	0	0	0	0	0	0	0	0	0	0	0	0	0	0	0	0	0	0	0	0	0	0	0	0	0	0	0
28526657	8	145067965	.	.	.	.	PLEC1	plectin 1, intermediate filament binding protein 500kDa	Nonsynon	0.99		1	7	3.49	0	0	0	0	0	0	0	0	0	0	0	0	0	0	0	0	0	0	0	0	0	0	0	0	0	0	0	0	0	0	0	0	0	0	0
34132016	8	145066016	.	.	.	.	PLEC1	plectin 1, intermediate filament binding protein 500kDa	Nonsynon	0.99		1	7	3.49	0	0	0	0	0	0	0	0	0	0	0	0	0	0	0	0	0	0	0	0	0	0	0	0	0	0	0	0	0	0	0	0	0	0	0
34380223	8	145064390	.	.	.	.	PLEC1	plectin 1, intermediate filament binding protein 500kDa	Nonsynon	0.99		1	7	3.49	0	0	0	0	0	0	0	0	0	0	0	0	0	0	0	0	0	0	0	0	0	0	0	0	0	0	0	0	0	0	0	0	0	0	0
34725742	8	145065931	.	.	.	.	PLEC1	plectin 1, intermediate filament binding protein 500kDa	Nonsynon	0.99		1	7	3.49	0	0	0	0	0	0	0	0	0	0	0	0	0	0	0	0	0	0	0	0	0	0	0	0	0	0	0	0	0	0	0	0	0	0	0
34833874	8	145066245	.	.	.	.	PLEC1	plectin 1, intermediate filament binding protein 500kDa	Nonsynon	0.99		1	7	3.49	0	0	0	0	0	0	0	0	0	0	0	0	0	0	0	0	0	0	0	0	0	0	0	0	0	0	0	0	0	0	0	0	0	0	0
35027700	8	145066904	.	.	.	.	PLEC1	plectin 1, intermediate filament binding protein 500kDa	Nonsynon	0.99		1	7	3.49	0	0	0	0	0	0	0	0	0	0	0	0	0	0	0	0	0	0	0	0	0	0	0	0	0	0	0	0	0	0	0	0	0	0	0
35144369	8	145062596	.	.	.	.	PLEC1	plectin 1, intermediate filament binding protein 500kDa	Nonsynon	0.99		1	7	3.49	0	0	0	0	0	0	0	0	0	0	0	0	0	0	0	0	0	0	0	0	0	0	0	0	0	0	0	0	0	0	0	0	0	0	0
35261863	8	145065919	.	.	.	.	PLEC1	plectin 1, intermediate filament binding protein 500kDa	Nonsynon	0.99		1	7	3.49	0	0	0	0	0	0	0	0	0	0	0	0	0	0	0	0	0	0	0	0	0	0	0	0	0	0	0	0	0	0	0	0	0	0	0
35365120	8	145064791	.	.	.	.	PLEC1	plectin 1, intermediate filament binding protein 500kDa	Nonsynon	0.99		1	7	3.49	0	0	0	0	0	0	0	0	0	0	0	0	0	0	0	0	0	0	0	0	0	0	0	0	0	0	0	0	0	0	0	0	0	0	0
35723243	8	145067927	.	.	.	.	PLEC1	plectin 1, intermediate filament binding protein 500kDa	Nonsynon	0.99		1	7	3.49	0	0	0	0	0	0	0	0	0	0	0	0	0	0	0	0	0	0	0	0	0	0	0	0	0	0	0	0	0	0	0	0	0	0	0
35858667	8	145066876	.	.	.	.	PLEC1	plectin 1, intermediate filament binding protein 500kDa	Nonsynon	0.99		1	7	3.49	0	0	0	0	0	0	0	0	0	0	0	0	0	0	0	0	0	0	0	0	0	0	0	0	0	0	0	0	0	0	0	0	0	0	0
3179089	14	89943165	0.414	0.256	0.25	0.051	CALM1	calmodulin 1 (phosphorylase kinase, delta)	mRNA-UTR	0.69	Special	1	11	3.49	0	0	0	0	0	0	0	0	0	0	0	0	0	1	1	1	0	1	0	1	0	1	0	1	0	1	0	1	0	1	0	1	0	1	0
671	12	110726149	0	0.156	0.227	0	ALDH2	aldehyde dehydrogenase 2 family (mitochondrial)	Nonsynon	0.8	The Alcohol System	0	1	3.49	0	1	0	0	0	0	1	0	1	0	0	1	0	0	1	1	0	0	0	0	0	0	1	1	0	1	1	1	1	0	1	1	0	1	1
324420	1	46643348	0.225	0.133	0.193	0.442	FAAH	fatty acid amide hydrolase	Nonsynon	0.8	Special	0	1	3.49	1	1	0	0	1	1	1	1	1	1	1	1	1	1	1	1	1	1	1	1	1	1	1	1	1	1	1	1	1	1	1	1	1	1	1
640132	11	120338502	0	0	0	0	GRIK4	glutamate receptor, ionotropic, kainate 4	Nonsynon	0.8	The Glutamatergic System	0	1	3.49	0	0	0	0	0	0	0	0	1	0	0	0	0	0	0	0	0	0	0	0	0	0	0	0	0	0	0	0	0	0	0	0	0	1	1
933135	3	38027729	0.017	0.216	0.143	0	PLCD1	phospholipase C, delta 1	Nonsynon	0.8	Special	0	1	3.49	0	0	0	0	0	0	0	0	1	0	0	0	0	0	0	0	0	0	0	0	0	0	0	0	0	0	0	0	0	0	0	0	0	1	1
1052538	23	122379008	0	0.015	0	0	GRIA3	glutamate receptor, ionotrophic, AMPA 3	Nonsynon	0.8	The Glutamatergic System	0	1	3.49	0	0	0	0	0	0	0	0	0	0	0	0	0	0	0	0	0	0	0	0	0	0	0	0	0	0	0	0	0	0	0	0	0	0	0
1126642	17	40344589	0.05	0.067	0.091	0.017	GFAP	glial fibrillary acidic protein	Nonsynon	0.8	Special	0	1	3.49	0	0	0	0	1	1	1	1	1	0	1	1	0	0	1	1	0	1	1	1	1	1	1	1	1	1	1	1	1	1	1	1	1	1	1
1130737	15	99237678	.	.	.	.	ALDH1A3	aldehyde dehydrogenase 1 family, member A3	Nonsynon	0.8	The Alcohol System	0	1	3.49	0	0	0	0	0	0	0	0	0	0	0	0	0	0	0	0	0	0	0	0	0	0	0	0	0	0	0	0	0	0	0	0	0	0	0
1805001	11	6248961	.	.	.	.	CCKBR	cholecystokinin B receptor	Nonsynon	0.8	Goldman Gene	0	1	3.49	0	0	0	0	0	0	0	0	0	0	0	0	0	0	0	0	0	0	0	0	0	0	0	0	0	0	0	0	0	0	0	0	0	0	0
1882118	12	50734455	.	.	.	.	NR4A1	nuclear receptor subfamily 4, group A, member 1	Nonsynon	0.8	Special	0	1	3.49	0	0	0	0	0	0	0	0	0	0	0	0	0	0	0	0	0	0	0	0	0	0	0	0	0	0	0	0	0	0	0	0	0	0	0
2229348	20	39224724	.	.	.	.	PLCG1	phospholipase C, gamma 1	Nonsynon	0.8	Special	0	1	3.49	0	0	0	0	0	0	0	0	0	0	0	0	0	0	0	0	0	0	0	0	0	0	0	0	0	0	0	0	0	0	0	0	0	0	0
2235361	20	39234284	.	.	.	.	PLCG1	phospholipase C, gamma 1	Nonsynon	0.8	Special	0	1	3.49	0	0	0	0	0	0	0	0	0	0	0	0	0	0	0	0	0	0	0	0	0	0	0	0	0	0	0	0	0	0	0	0	0	0	0
2272858	22	24429537	0	0	0.023	0	ADRBK2	adrenergic, beta, receptor kinase 2	Synon	0.8	The Adrenergic System	0	4	3.49	0	0	0	0	0	0	0	0	0	0	0	0	0	0	0	0	0	0	0	0	0	0	0	0	0	0	0	0	0	0	0	0	0	0	0
2289080	2	233114422	0.008	0.044	0.148	0.017	CHRNG	cholinergic receptor, nicotinic, gamma	Nonsynon	0.8	The Nicotine System	0	1	3.49	1	0	0	0	0	0	0	0	1	0	0	1	0	0	0	1	0	0	0	0	0	0	0	0	0	0	0	0	0	0	0	0	0	1	1
2294315	6	135281505	0	0	0	0	ALDH8A1	aldehyde dehydrogenase 8 family, member A1	Nonsynon	0.8	The Alcohol System	0	1	3.49	0	0	0	0	0	0	1	0	1	0	0	0	0	0	0	0	0	0	0	0	0	0	0	0	0	1	1	1	1	0	0	0	0	1	1
2364787	3	38026240	.	.	.	.	PLCD1	phospholipase C, delta 1	Nonsynon	0.8	Special	0	1	3.49	0	0	0	0	0	0	0	0	0	0	0	0	0	0	0	0	0	0	0	0	0	0	0	0	0	0	0	0	0	0	0	0	0	0	0
2364788	3	38026242	.	.	.	.	PLCD1	phospholipase C, delta 1	Nonsynon	0.8	Special	0	1	3.49	0	0	0	0	0	0	0	0	0	0	0	0	0	0	0	0	0	0	0	0	0	0	0	0	0	0	0	0	0	0	0	0	0	0	0
2364790	3	38026267	.	.	.	.	PLCD1	phospholipase C, delta 1	Nonsynon	0.8	Special	0	1	3.49	0	0	0	0	0	0	0	0	0	0	0	0	0	0	0	0	0	0	0	0	0	0	0	0	0	0	0	0	0	0	0	0	0	0	0
2839673	10	26553557	.	.	.	.	GAD2	glutamate decarboxylase 2 (pancreatic islets and brain, 65kDa)	Nonsynon	0.8	The Glutamatergic System	0	1	3.49	0	0	0	0	0	0	0	0	0	0	0	0	0	0	0	0	0	0	0	0	0	0	0	0	0	0	0	0	0	0	0	0	0	0	0
3064500	17	15818837	.	.	.	.	ADORA2B	adenosine A2b receptor	Synon	0.8	Special	0	4	3.49	0	0	0	0	0	0	0	0	0	0	0	0	0	0	0	0	0	0	0	0	0	0	0	0	0	0	0	0	0	0	0	0	0	0	0
5848320	3	38026233	.	.	.	.	PLCD1	phospholipase C, delta 1	Nonsynon	0.8	Special	0	1	3.49	0	0	0	0	0	0	0	0	0	0	0	0	0	0	0	0	0	0	0	0	0	0	0	0	0	0	0	0	0	0	0	0	0	0	0
5848323	3	38026251	.	.	.	.	PLCD1	phospholipase C, delta 1	Nonsynon	0.8	Special	0	1	3.49	0	0	0	0	0	0	0	0	0	0	0	0	0	0	0	0	0	0	0	0	0	0	0	0	0	0	0	0	0	0	0	0	0	0	0
5848326	3	38026273	.	.	.	.	PLCD1	phospholipase C, delta 1	Nonsynon	0.8	Special	0	1	3.49	0	0	0	0	0	0	0	0	0	0	0	0	0	0	0	0	0	0	0	0	0	0	0	0	0	0	0	0	0	0	0	0	0	0	0
5848327	3	38026281	.	.	.	.	PLCD1	phospholipase C, delta 1	Nonsynon	0.8	Special	0	1	3.49	0	0	0	0	0	0	0	0	0	0	0	0	0	0	0	0	0	0	0	0	0	0	0	0	0	0	0	0	0	0	0	0	0	0	0
5848338	3	38027765	.	.	.	.	PLCD1	phospholipase C, delta 1	Nonsynon	0.8	Special	0	1	3.49	0	0	0	0	0	0	0	0	0	0	0	0	0	0	0	0	0	0	0	0	0	0	0	0	0	0	0	0	0	0	0	0	0	0	0
5848339	3	38027767	.	.	.	.	PLCD1	phospholipase C, delta 1	Nonsynon	0.8	Special	0	1	3.49	0	0	0	0	0	0	0	0	0	0	0	0	0	0	0	0	0	0	0	0	0	0	0	0	0	0	0	0	0	0	0	0	0	0	0
5848340	3	38027836	.	.	.	.	PLCD1	phospholipase C, delta 1	Nonsynon	0.8	Special	0	1	3.49	0	0	0	0	0	0	0	0	0	0	0	0	0	0	0	0	0	0	0	0	0	0	0	0	0	0	0	0	0	0	0	0	0	0	0
5848341	3	38027871	.	.	.	.	PLCD1	phospholipase C, delta 1	Nonsynon	0.8	Special	0	1	3.49	0	0	0	0	0	0	0	0	0	0	0	0	0	0	0	0	0	0	0	0	0	0	0	0	0	0	0	0	0	0	0	0	0	0	0
6019652	20	34508562	.	0.011	0.057	0	DLGAP4	discs, large (Drosophila) homolog-associated protein 4	Nonsynon	0.8	Special	0	1	3.49	0	0	0	0	0	0	0	0	1	0	0	0	0	0	0	0	0	0	0	0	0	0	0	0	0	0	0	0	0	0	0	0	0	1	1
9837637	3	38026953	.	.	.	.	PLCD1	phospholipase C, delta 1	Nonsynon	0.8	Special	0	1	3.49	0	0	0	0	0	0	0	0	0	0	0	0	0	0	0	0	0	0	0	0	0	0	0	0	0	0	0	0	0	0	0	0	0	0	0
11547263	20	39224576	.	.	.	.	PLCG1	phospholipase C, gamma 1	Nonsynon	0.8	Special	0	1	3.49	0	0	0	0	0	0	0	0	0	0	0	0	0	0	0	0	0	0	0	0	0	0	0	0	0	0	0	0	0	0	0	0	0	0	0
11553948	11	105455522	0	0	0	0	AASDHPPT	aminoadipate-semialdehyde dehydrogenase-phosphopantetheinyl transferase	Nonsynon	0.8	The Alcohol System	0	1	3.49	0	0	0	0	0	0	0	0	0	0	0	0	0	0	0	0	0	0	0	0	0	0	0	0	0	0	0	0	0	0	0	0	0	0	0
17056661	18	71042525	0.017	0	0	0	ZADH2	zinc binding alcohol dehydrogenase, domain containing 2	Nonsynon	0.8	The Alcohol System	0	1	3.49	0	0	0	0	0	0	0	0	1	0	0	0	0	0	0	0	0	0	0	0	0	0	0	0	0	0	0	0	0	0	0	0	0	1	1
28730804	15	64569964	.	.	.	.	MAP2K1	mitogen-activated protein kinase kinase 1	Nonsynon	0.8	Special	0	1	3.49	0	0	0	0	0	0	0	0	0	0	0	0	0	0	0	0	0	0	0	0	0	0	0	0	0	0	0	0	0	0	0	0	0	0	0
34134504	2	24899682	.	.	.	.	ADCY3	adenylate cyclase 3	Nonsynon	0.8	Special	0	1	3.49	0	0	0	0	0	0	0	0	0	0	0	0	0	0	0	0	0	0	0	0	0	0	0	0	0	0	0	0	0	0	0	0	0	0	0
34449927	11	35239033	.	.	.	.	SLC1A2	solute carrier family 1 (glial high affinity glutamate transporter), member 2	Nonsynon	0.8	The Glutamatergic System	0	1	3.49	0	0	0	0	0	0	0	0	0	0	0	0	0	0	0	0	0	0	0	0	0	0	0	0	0	0	0	0	0	0	0	0	0	0	0
34625936	7	30668872	.	.	.	.	CRHR2	corticotropin releasing hormone receptor 2	Nonsynon	0.8	Goldman Gene	0	1	3.49	0	0	0	0	0	0	0	0	0	0	0	0	0	0	0	0	0	0	0	0	0	0	0	0	0	0	0	0	0	0	0	0	0	0	0
34780937	11	35239070	.	.	.	.	SLC1A2	solute carrier family 1 (glial high affinity glutamate transporter), member 2	Nonsynon	0.8	The Glutamatergic System	0	1	3.49	0	0	0	0	0	0	0	0	0	0	0	0	0	0	0	0	0	0	0	0	0	0	0	0	0	0	0	0	0	0	0	0	0	0	0
35103635	17	15818839	.	.	.	.	ADORA2B	adenosine A2b receptor	Synon	0.8	Special	0	4	3.49	0	0	0	0	0	0	0	0	0	0	0	0	0	0	0	0	0	0	0	0	0	0	0	0	0	0	0	0	0	0	0	0	0	0	0
35622066	17	15818836	.	.	.	.	ADORA2B	adenosine A2b receptor	Synon	0.8	Special	0	4	3.49	0	0	0	0	0	0	0	0	0	0	0	0	0	0	0	0	0	0	0	0	0	0	0	0	0	0	0	0	0	0	0	0	0	0	0
36210421	7	150275361	.	.	.	.	KCNH2	potassium voltage-gated channel, subfamily H (eag-related), member 2	Nonsynon	0.8	Special	0	1	3.49	0	0	0	0	0	0	0	0	0	0	0	0	0	0	0	0	0	0	0	0	0	0	0	0	0	0	0	0	0	0	0	0	0	0	0
36210422	7	150286470	.	.	.	.	KCNH2	potassium voltage-gated channel, subfamily H (eag-related), member 2	Nonsynon	0.8	Special	0	1	3.49	0	0	0	0	0	0	0	0	0	0	0	0	0	0	0	0	0	0	0	0	0	0	0	0	0	0	0	0	0	0	0	0	0	0	0
41286234	6	135281451	.	.	.	.	ALDH8A1	aldehyde dehydrogenase 8 family, member A1	Nonsynon	0.8	The Alcohol System	0	1	3.49	0	0	0	0	0	0	0	0	0	0	0	0	0	0	0	0	0	0	0	0	0	0	0	0	0	0	0	0	0	0	0	0	0	0	0
41307271	7	150275424	.	.	.	.	KCNH2	potassium voltage-gated channel, subfamily H (eag-related), member 2	Nonsynon	0.8	Special	0	1	3.49	0	0	0	0	0	0	0	0	0	0	0	0	0	0	0	0	0	0	0	0	0	0	0	0	0	0	0	0	0	0	0	0	0	0	0
41307274	7	150275443	.	.	.	.	KCNH2	potassium voltage-gated channel, subfamily H (eag-related), member 2	Nonsynon	0.8	Special	0	1	3.49	0	0	0	0	0	0	0	0	0	0	0	0	0	0	0	0	0	0	0	0	0	0	0	0	0	0	0	0	0	0	0	0	0	0	0
41307280	7	150275455	.	.	.	.	KCNH2	potassium voltage-gated channel, subfamily H (eag-related), member 2	Nonsynon	0.8	Special	0	1	3.49	0	0	0	0	0	0	0	0	0	0	0	0	0	0	0	0	0	0	0	0	0	0	0	0	0	0	0	0	0	0	0	0	0	0	0
41308954	7	150286454	.	.	.	.	KCNH2	potassium voltage-gated channel, subfamily H (eag-related), member 2	Nonsynon	0.8	Special	0	1	3.49	0	0	0	0	0	0	0	0	0	0	0	0	0	0	0	0	0	0	0	0	0	0	0	0	0	0	0	0	0	0	0	0	0	0	0
41311018	7	150285430	.	.	.	.	KCNH2	potassium voltage-gated channel, subfamily H (eag-related), member 2	Nonsynon	0.8	Special	0	1	3.49	0	0	0	0	0	0	0	0	0	0	0	0	0	0	0	0	0	0	0	0	0	0	0	0	0	0	0	0	0	0	0	0	0	0	0
41313074	7	150275454	.	.	.	.	KCNH2	potassium voltage-gated channel, subfamily H (eag-related), member 2	Nonsynon	0.8	Special	0	1	3.49	0	0	0	0	0	0	0	0	0	0	0	0	0	0	0	0	0	0	0	0	0	0	0	0	0	0	0	0	0	0	0	0	0	0	0
41313761	7	150275442	.	.	.	.	KCNH2	potassium voltage-gated channel, subfamily H (eag-related), member 2	Nonsynon	0.8	Special	0	1	3.49	0	0	0	0	0	0	0	0	0	0	0	0	0	0	0	0	0	0	0	0	0	0	0	0	0	0	0	0	0	0	0	0	0	0	0
41313764	7	150275449	.	.	.	.	KCNH2	potassium voltage-gated channel, subfamily H (eag-related), member 2	Nonsynon	0.8	Special	0	1	3.49	0	0	0	0	0	0	0	0	0	0	0	0	0	0	0	0	0	0	0	0	0	0	0	0	0	0	0	0	0	0	0	0	0	0	0
36227603	4	164488074	.	.	.	.	NPY5R	neuropeptide Y receptor Y5	mRNA-UTR	0.68	Goldman Gene	1	6	3.48	0	0	0	0	0	0	0	0	0	0	0	0	0	0	0	0	0	0	0	0	0	0	0	0	0	0	0	0	0	0	0	0	0	0	0
2857831	8	145069852	.	.	.	.	PLEC1	plectin 1, intermediate filament binding protein 500kDa	Nonsynon	0.98		1	7	3.48	0	0	0	0	0	0	0	0	0	0	0	0	0	0	0	0	0	0	0	0	0	0	0	0	0	0	0	0	0	0	0	0	0	0	0
2857832	8	145069766	.	.	.	.	PLEC1	plectin 1, intermediate filament binding protein 500kDa	Nonsynon	0.98		1	7	3.48	0	0	0	0	0	0	0	0	0	0	0	0	0	0	0	0	0	0	0	0	0	0	0	0	0	0	0	0	0	0	0	0	0	0	0
6985234	8	145069258	.	.	.	.	PLEC1	plectin 1, intermediate filament binding protein 500kDa	Nonsynon	0.98		1	7	3.48	0	0	0	0	0	0	0	0	0	0	0	0	0	0	0	0	0	0	0	0	0	0	0	0	0	0	0	0	0	0	0	0	0	0	0
34913638	8	145069554	.	.	.	.	PLEC1	plectin 1, intermediate filament binding protein 500kDa	Nonsynon	0.98		1	7	3.48	0	0	0	0	0	0	0	0	0	0	0	0	0	0	0	0	0	0	0	0	0	0	0	0	0	0	0	0	0	0	0	0	0	0	0
6264	7	50579229	0	0	0	0.033	DDC	dopa decarboxylase (aromatic L-amino acid decarboxylase)	Nonsynon	0.79	Dopamine Synthesis	0	1	3.48	1	1	0	1	0	0	0	0	1	0	0	0	0	1	1	1	1	0	0	0	0	0	0	0	0	0	0	0	0	0	0	0	0	1	1
643788	11	118472968	0.467	0.389	0.432	0.283	DPAGT1	dolichyl-phosphate (UDP-N-acetylglucosamine) N-acetylglucosaminephosphotransferase 1 (GlcNAc-1-P transferase)	Nonsynon	0.79	Special	0	1	3.48	0	0	0	0	1	1	1	1	1	1	1	1	0	1	1	1	0	1	1	1	1	1	1	1	1	1	1	1	1	1	1	1	1	1	1
721710	12	38995335	0	0	0.011	0	LRRK2	leucine-rich repeat kinase 2	Nonsynon	0.79	Special	0	1	3.48	0	0	0	0	0	0	0	0	1	0	0	0	0	0	0	0	0	0	0	0	0	0	0	0	0	0	0	0	0	0	0	0	0	1	1
1062136	12	110714896	0	0.011	0.023	0	ALDH2	aldehyde dehydrogenase 2 family (mitochondrial)	Nonsynon	0.79	The Alcohol System	0	1	3.48	0	0	0	0	0	0	0	0	0	0	0	0	0	0	0	0	0	0	0	0	0	0	0	0	0	0	0	0	0	0	0	0	0	0	0
1569116	17	45571943	0.155	0	0	0.271	PPP1R9B	protein phosphatase 1, regulatory (inhibitor) subunit 9B	Nonsynon	0.79	Special	0	1	3.48	0	0	0	0	0	0	0	0	1	0	0	0	0	0	0	0	0	0	0	0	0	1	0	0	0	1	0	0	0	1	0	0	0	1	1
2229110	1	1946897	.	.	.	.	GABRD	gamma-aminobutyric acid (GABA) A receptor, delta	Synon	0.79	The GABA System	0	4	3.48	0	0	0	0	0	0	0	0	0	0	0	0	0	0	0	0	0	0	0	0	0	0	0	0	0	0	0	0	0	0	0	0	0	0	0
2229579	1	24073749	0.086	0.273	0.116	0	CNR2	cannabinoid receptor 2 (macrophage)	Nonsynon	0.79	The Endocannabinoid System	0	1	3.48	0	0	0	0	0	0	0	0	1	0	0	0	0	1	1	1	0	0	0	0	0	0	0	0	0	0	0	0	0	0	0	0	0	1	1
2275349	1	201364737	0	0	0	0	ADORA1	adenosine A1 receptor	Nonsynon	0.79	Special	0	1	3.48	0	0	0	0	0	0	0	0	0	0	0	0	0	0	0	0	0	0	0	0	0	0	0	0	0	0	0	0	0	0	0	0	0	0	0
2286246	1	44235812	0	0	0	0	SLC6A9	solute carrier family 6 (neurotransmitter transporter, glycine), member 9	Nonsynon	0.79	Neurotransmitter Transporters	0	1	3.48	0	0	0	0	0	0	0	0	1	0	0	0	0	0	0	0	0	0	0	0	0	0	0	0	0	0	0	0	0	0	0	0	0	1	1
2286247	1	44235926	.	.	.	.	SLC6A9	solute carrier family 6 (neurotransmitter transporter, glycine), member 9	Nonsynon	0.79	Neurotransmitter Transporters	0	1	3.48	0	0	0	0	0	0	0	0	0	0	0	0	0	0	0	0	0	0	0	0	0	0	0	0	0	0	0	0	0	0	0	0	0	0	0
2501432	1	24074507	.	.	.	.	CNR2	cannabinoid receptor 2 (macrophage)	Nonsynon	0.79	The Endocannabinoid System	0	1	3.48	0	0	0	0	0	0	0	0	0	0	0	0	0	0	0	0	0	0	0	0	0	0	0	0	0	0	0	0	0	0	0	0	0	0	0
2585405	17	7987497	.	.	.	.	PER1	period homolog 1 (Drosophila)	Nonsynon	0.79	Special	0	1	3.48	0	0	0	0	0	0	0	0	0	0	0	0	0	0	0	0	0	0	0	0	0	0	0	0	0	0	0	0	0	0	0	0	0	0	0
3027184	17	7990742	0	.	.	0	PER1	period homolog 1 (Drosophila)	Nonsynon	0.79	Special	0	1	3.48	0	0	0	0	0	0	0	0	0	0	0	0	0	0	0	0	0	0	0	0	0	0	0	0	0	0	0	0	0	0	0	0	0	0	0
3027193	17	7987478	0	0.011	0	0	PER1	period homolog 1 (Drosophila)	Nonsynon	0.79	Special	0	1	3.48	0	0	0	0	0	0	0	0	1	0	0	0	0	0	0	0	0	0	0	0	0	0	0	0	0	0	0	0	0	0	0	0	0	1	1
3027194	17	7987400	0	0	0	0	PER1	period homolog 1 (Drosophila)	Nonsynon	0.79	Special	0	1	3.48	0	0	0	0	0	0	0	0	0	0	0	0	0	0	0	0	0	0	0	0	0	0	0	0	0	0	0	0	0	0	0	0	0	0	0
4838544	10	50526658	0	0	0	0.164	CHAT	choline acetyltransferase	Nonsynon	0.79	Special	0	1	3.48	0	0	1	1	0	0	0	0	0	1	1	1	1	1	1	1	1	0	0	0	0	0	0	0	0	0	0	0	0	0	0	0	1	0	0
6065316	20	39227132	.	.	.	.	PLCG1	phospholipase C, gamma 1	Nonsynon	0.79	Special	0	1	3.48	0	0	0	0	0	0	0	0	0	0	0	0	0	0	0	0	0	0	0	0	0	0	0	0	0	0	0	0	0	0	0	0	0	0	0
7506742	18	46510211	.	.	.	.	MAPK4	mitogen-activated protein kinase 4	Nonsynon	0.79	Special	0	1	3.48	0	0	0	0	0	0	0	0	0	0	0	0	0	0	0	0	0	0	0	0	0	0	0	0	0	0	0	0	0	0	0	0	0	0	0
8190671	10	26574872	0	0	0	0	GAD2	glutamate decarboxylase 2 (pancreatic islets and brain, 65kDa)	Nonsynon	0.79	The Glutamatergic System	0	1	3.48	0	0	0	0	0	0	0	0	1	0	0	0	0	0	0	0	0	0	0	0	0	0	0	0	0	0	0	0	0	0	0	0	0	1	1
11547174	1	201364740	.	.	.	.	ADORA1	adenosine A1 receptor	Nonsynon	0.79	Special	0	1	3.48	0	0	0	0	0	0	0	0	0	0	0	0	0	0	0	0	0	0	0	0	0	0	0	0	0	0	0	0	0	0	0	0	0	0	0
11547175	1	201364719	0	0.011	0	0	ADORA1	adenosine A1 receptor	Nonsynon	0.79	Special	0	1	3.48	0	0	0	0	0	0	0	0	0	0	0	0	0	0	0	0	0	0	0	0	0	0	0	0	0	0	0	0	0	0	0	0	0	0	0
11547176	1	201364906	.	.	.	0	ADORA1	adenosine A1 receptor	Nonsynon	0.79	Special	0	1	3.48	0	0	0	0	0	0	0	0	0	0	0	0	0	0	0	0	0	0	0	0	0	0	0	0	0	0	0	0	0	0	0	0	0	0	0
11547177	1	201364600	.	.	.	.	ADORA1	adenosine A1 receptor	Nonsynon	0.79	Special	0	1	3.48	0	0	0	0	0	0	0	0	0	0	0	0	0	0	0	0	0	0	0	0	0	0	0	0	0	0	0	0	0	0	0	0	0	0	0
11575292	7	50579095	0	0	0	0.034	DDC	dopa decarboxylase (aromatic L-amino acid decarboxylase)	Nonsynon	0.79	Dopamine Synthesis	0	1	3.48	1	1	0	1	0	0	0	0	1	0	0	0	0	1	1	1	1	0	0	0	0	0	0	0	0	0	0	0	0	0	0	0	0	1	1
11658069	17	7987832	0	0	0	0	PER1	period homolog 1 (Drosophila)	Nonsynon	0.79	Special	0	1	3.48	0	0	0	0	0	0	0	0	1	0	0	0	0	0	0	0	0	0	0	0	0	0	0	0	0	0	0	0	0	0	0	0	0	1	1
12423862	12	39028553	0	0	0	0	LRRK2	leucine-rich repeat kinase 2	Nonsynon	0.79	Special	0	1	3.48	0	0	0	0	0	0	0	0	1	0	0	0	0	0	0	0	0	0	0	0	0	0	0	0	0	0	0	0	0	0	0	0	0	1	1
12737742	1	110511243	.	.	.	.	SLC6A17	solute carrier family 6, member 17	Nonsynon	0.79	Neurotransmitter Transporters	0	1	3.48	0	0	0	0	0	0	0	0	0	0	0	0	0	0	0	0	0	0	0	0	0	0	0	0	0	0	0	0	0	0	0	0	0	0	0
12937495	17	7986872	0	0	0	0	PER1	period homolog 1 (Drosophila)	Nonsynon	0.79	Special	0	1	3.48	0	0	0	0	0	0	0	0	1	0	0	0	0	0	0	0	0	0	0	0	0	0	0	0	0	0	0	0	0	0	0	0	0	1	1
16940655	17	41249667	.	.	.	.	CRHR1	corticotropin releasing hormone receptor 1	Nonsynon	0.79	Goldman Gene	0	1	3.48	0	0	0	0	0	0	0	0	0	0	0	0	0	0	0	0	0	0	0	0	0	0	0	0	0	0	0	0	0	0	0	0	0	0	0
17852582	16	82339305	.	.	.	.	CDH13	cadherin 13, H-cadherin (heart)	Nonsynon	0.79	Special	0	1	3.48	0	0	0	0	0	0	0	0	0	0	0	0	0	0	0	0	0	0	0	0	0	0	0	0	0	0	0	0	0	0	0	0	0	0	0
17856698	17	7291102	0	0	0	0	CHRNB1	cholinergic receptor, nicotinic, beta 1 (muscle)	Nonsynon	0.79	The Nicotine System	0	1	3.48	0	0	0	0	0	0	0	0	0	0	0	0	0	0	0	0	0	0	0	0	0	0	0	0	0	0	0	0	0	0	0	0	0	0	0
28381223	1	145125187	.	.	.	.	FMO5	flavin containing monooxygenase 5	Nonsynon	0.79	The Nicotine Metabolism System	0	1	3.48	0	0	0	0	0	0	0	0	0	0	0	0	0	0	0	0	0	0	0	0	0	0	0	0	0	0	0	0	0	0	0	0	0	0	0
33995883	12	39026953	.	.	.	.	LRRK2	leucine-rich repeat kinase 2	Nonsynon	0.79	Special	0	1	3.48	0	0	0	0	0	0	0	0	0	0	0	0	0	0	0	0	0	0	0	0	0	0	0	0	0	0	0	0	0	0	0	0	0	0	0
34111946	11	113365591	.	.	.	.	HTR3A	5-hydroxytryptamine (serotonin) receptor 3A	Nonsynon	0.79	The Serotonergic System	0	1	3.48	0	0	0	0	0	0	0	0	0	0	0	0	0	0	0	0	0	0	0	0	0	0	0	0	0	0	0	0	0	0	0	0	0	0	0
35460901	7	120173134	.	.	.	.	KCND2	potassium voltage-gated channel, Shal-related subfamily, member 2	Nonsynon	0.79	Special	0	1	3.48	0	0	0	0	0	0	0	0	0	0	0	0	0	0	0	0	0	0	0	0	0	0	0	0	0	0	0	0	0	0	0	0	0	0	0
35505654	17	7990428	.	.	.	.	PER1	period homolog 1 (Drosophila)	Nonsynon	0.79	Special	0	1	3.48	0	0	0	0	0	0	0	0	0	0	0	0	0	0	0	0	0	0	0	0	0	0	0	0	0	0	0	0	0	0	0	0	0	0	0
41311993	1	24074298	.	.	.	.	CNR2	cannabinoid receptor 2 (macrophage)	Nonsynon	0.79	The Endocannabinoid System	0	1	3.48	0	0	0	0	0	0	0	0	0	0	0	0	0	0	0	0	0	0	0	0	0	0	0	0	0	0	0	0	0	0	0	0	0	0	0
1065358	7	44226277	.	.	.	.	CAMK2B	calcium/calmodulin-dependent protein kinase (CaM kinase) II beta	Nonsynon	0.78	Special	0	1	3.47	0	0	0	0	0	0	0	0	0	0	0	0	0	0	0	0	0	0	0	0	0	0	0	0	0	0	0	0	0	0	0	0	0	0	0
2232177	22	29864280	.	.	.	.	PLA2G3	phospholipase A2, group III	Nonsynon	0.78	Special	0	1	3.47	0	0	0	0	0	0	0	0	0	0	0	0	0	0	0	0	0	0	0	0	0	0	0	0	0	0	0	0	0	0	0	0	0	0	0
2256408	12	38905349	.	0	0	0.118	LRRK2	leucine-rich repeat kinase 2	Nonsynon	0.78	Special	0	1	3.47	0	0	0	0	0	0	0	0	1	0	0	0	1	0	0	0	1	0	0	0	0	0	0	0	1	0	0	0	1	0	0	0	1	1	1
2275807	20	34586136	0	0	0.011	0	DLGAP4	discs, large (Drosophila) homolog-associated protein 4	Nonsynon	0.78	Special	0	1	3.47	0	0	0	0	0	0	0	0	1	0	0	0	0	0	0	0	0	0	0	0	0	0	0	0	0	0	0	0	0	0	0	0	0	1	1
2285906	19	959683	.	0.156	0.125	0.033	GRIN3B	glutamate receptor, ionotropic, N-methyl-D-aspartate 3B	Nonsynon	0.78	The Glutamatergic System	0	1	3.47	0	0	0	0	0	0	0	0	0	0	0	0	0	0	0	0	0	0	0	0	0	0	0	0	0	0	0	0	0	0	0	0	0	0	0
3025679	16	3730415	0	0	0	0	CREBBP	CREB binding protein (Rubinstein-Taybi syndrome)	Synon	0.78	Special	0	4	3.47	0	0	0	0	0	0	0	0	0	0	0	0	0	0	0	0	0	0	0	0	0	0	0	0	0	0	0	0	0	0	0	0	0	0	0
3025702	16	3800641	0	0	0.044	0.275	CREBBP	CREB binding protein (Rubinstein-Taybi syndrome)	Synon	0.78	Special	0	4	3.47	0	0	1	1	0	0	0	0	1	1	1	1	1	1	1	1	1	0	0	0	0	0	0	0	0	0	0	0	0	0	0	0	0	1	1
3177865	17	3531949	0	0	0	0	P2RX5	purinergic receptor P2X, ligand-gated ion channel, 5	Nonsynon	0.78	Special	0	1	3.47	0	0	0	0	0	0	0	0	0	0	0	0	0	0	0	0	0	0	0	0	0	0	0	0	0	0	0	0	0	0	0	0	0	0	0
3211275	8	145138048	.	.	.	.	GRINA	glutamate receptor, ionotropic, N-methyl D-asparate-associated protein 1 (glutamate binding)	Synon	0.78	The Glutamatergic System	0	4	3.47	0	0	0	0	0	0	0	0	0	0	0	0	0	0	0	0	0	0	0	0	0	0	0	0	0	0	0	0	0	0	0	0	0	0	0
3729782	3	139886164	0	0	0	0	PIK3CB	phosphoinositide-3-kinase, catalytic, beta polypeptide	Nonsynon	0.78	Special	0	1	3.47	0	0	0	0	0	0	0	0	1	0	0	0	0	0	0	0	0	0	0	0	0	0	0	0	0	0	0	0	0	0	0	0	0	1	1
3744215	17	70350244	0.258	0.044	0.08	0.3	GRIN2C	glutamate receptor, ionotropic, N-methyl D-aspartate 2C	Nonsynon	0.78	The Glutamatergic System	0	1	3.47	0	1	0	0	1	1	1	1	1	1	0	0	0	1	0	0	0	1	1	1	1	1	1	1	1	1	1	1	1	1	1	1	1	1	1
3762836	4	56005624	0	0	0	0	CLOCK	clock homolog (mouse)	Nonsynon	0.78	Special	0	1	3.47	0	1	0	0	0	0	0	0	0	0	0	0	0	0	0	0	0	0	0	0	0	0	0	0	0	0	0	0	0	0	0	0	0	0	0
3782369	12	83781358	0	0	0.011	0	SLC6A15	solute carrier family 6, member 15	Nonsynon	0.78	Neurotransmitter Transporters	0	1	3.47	0	0	0	0	0	0	1	0	1	0	0	0	0	0	0	0	0	0	0	0	0	0	0	0	0	1	1	1	1	0	0	0	0	1	1
4740548	9	13180162	0	0	0	0.075	MPDZ	multiple PDZ domain protein	Nonsynon	0.78	Goldman Gene	0	1	3.47	0	1	0	0	0	0	0	0	0	0	0	0	0	0	0	0	0	0	0	0	0	0	0	0	0	0	0	0	0	0	0	0	0	0	0
4741289	9	13180163	0	0	0	0.075	MPDZ	multiple PDZ domain protein	Nonsynon	0.78	Goldman Gene	0	1	3.47	0	0	0	0	0	0	0	0	1	0	0	0	0	0	0	0	0	0	0	0	0	0	0	0	0	0	0	0	0	0	0	0	0	1	1
8066269	17	46056812	.	.	.	.	CACNA1G	calcium channel, voltage-dependent, T type, alpha 1G subunit	Nonsynon	0.78	Special	0	1	3.47	0	0	0	0	0	0	0	0	0	0	0	0	0	0	0	0	0	0	0	0	0	0	0	0	0	0	0	0	0	0	0	0	0	0	0
8192495	7	30671755	0	0	0	0	CRHR2	corticotropin releasing hormone receptor 2	Nonsynon	0.78	Goldman Gene	0	1	3.47	0	0	0	0	0	0	0	0	1	0	0	0	0	0	0	0	0	0	0	0	0	0	0	0	0	0	0	0	0	0	0	0	0	1	1
10055742	5	1285445	.	.	.	.	SLC6A18	solute carrier family 6, member 18	Nonsynon	0.78	Neurotransmitter Transporters	0	1	3.47	0	0	0	0	0	0	0	0	0	0	0	0	0	0	0	0	0	0	0	0	0	0	0	0	0	0	0	0	0	0	0	0	0	0	0
11549121	6	31809915	.	.	.	.	CLIC1	chloride intracellular channel 1	Synon	0.78	Special	0	4	3.47	0	0	0	0	0	0	0	0	0	0	0	0	0	0	0	0	0	0	0	0	0	0	0	0	0	0	0	0	0	0	0	0	0	0	0
11549123	6	31809987	.	.	.	.	CLIC1	chloride intracellular channel 1	Synon	0.78	Special	0	4	3.47	0	0	0	0	0	0	0	0	0	0	0	0	0	0	0	0	0	0	0	0	0	0	0	0	0	0	0	0	0	0	0	0	0	0	0
11556291	16	74159497	0.009	0	0	0	GABARAPL2	GABA(A) receptor-associated protein-like 2	Nonsynon	0.78	The GABA System	0	1	3.47	0	0	0	0	0	0	0	0	0	0	0	0	0	0	0	0	0	0	0	0	0	0	0	0	0	0	0	0	0	0	0	0	0	0	0
11556297	16	74159556	0	0	0	0	GABARAPL2	GABA(A) receptor-associated protein-like 2	Nonsynon	0.78	The GABA System	0	1	3.47	0	0	0	0	0	0	0	0	0	0	0	0	0	0	0	0	0	0	0	0	0	0	0	0	0	0	0	0	0	0	0	0	0	0	0
11564148	12	39000168	0.392	0.356	0.239	0.192	LRRK2	leucine-rich repeat kinase 2	Nonsynon	0.78	Special	0	1	3.47	0	0	0	0	0	0	0	0	1	0	1	1	0	0	1	1	0	1	1	1	1	1	1	1	1	1	1	1	1	1	1	1	1	1	1
11739136	5	169743374	0.067	0.122	0.111	0.042	KCNMB1	potassium large conductance calcium-activated channel, subfamily M, beta member 1	Nonsynon	0.78	Special	0	1	3.47	0	0	0	0	1	1	1	1	1	0	0	0	0	0	1	1	0	1	1	1	1	1	1	1	1	1	1	1	1	1	1	1	1	1	1
12845773	23	43541333	0	0	0	0	MAOB	monoamine oxidase B	Nonsynon	0.78	Tyrosine	0	1	3.47	0	0	0	0	0	0	0	0	1	0	0	0	0	0	0	0	0	0	0	0	0	0	0	0	0	0	0	0	0	0	0	0	0	1	1
12845783	23	43541343	0	0	0	0	MAOB	monoamine oxidase B	Nonsynon	0.78	Tyrosine	0	1	3.47	0	0	0	0	0	0	1	0	0	0	0	0	0	0	0	0	0	0	0	0	0	0	0	0	0	1	1	1	1	0	0	0	0	0	0
12850496	23	43541335	0	0	0	0	MAOB	monoamine oxidase B	Nonsynon	0.78	Tyrosine	0	1	3.47	0	0	0	0	0	0	0	0	1	0	0	0	0	0	0	0	0	0	0	0	0	0	0	0	0	0	0	0	0	0	0	0	0	1	1
13277282	8	145138874	.	.	.	.	GRINA	glutamate receptor, ionotropic, N-methyl D-asparate-associated protein 1 (glutamate binding)	Synon	0.78	The Glutamatergic System	0	4	3.47	0	0	0	0	0	0	0	0	0	0	0	0	0	0	0	0	0	0	0	0	0	0	0	0	0	0	0	0	0	0	0	0	0	0	0
16829216	2	233118537	.	.	.	.	CHRNG	cholinergic receptor, nicotinic, gamma	Nonsynon	0.78	The Nicotine System	0	1	3.47	1	0	0	0	0	0	0	0	0	0	0	0	0	0	0	0	0	0	0	0	0	0	0	0	0	0	0	0	0	0	0	0	0	0	0
17183577	12	83801692	0.2	0	0	0	SLC6A15	solute carrier family 6, member 15	Nonsynon	0.78	Neurotransmitter Transporters	0	1	3.47	0	0	0	0	0	0	0	0	0	1	0	0	0	1	0	0	0	0	0	0	0	1	0	0	0	1	0	0	0	1	0	0	0	1	0
17855568	9	4551490	.	.	.	.	SLC1A1	solute carrier family 1 (neuronal/epithelial high affinity glutamate transporter, system Xag), member 1	Nonsynon	0.78	The Glutamatergic System	0	1	3.47	0	0	0	0	0	0	0	0	0	0	0	0	0	0	0	0	0	0	0	0	0	0	0	0	0	0	0	0	0	0	0	0	0	0	0
17856697	17	7289349	.	.	.	.	CHRNB1	cholinergic receptor, nicotinic, beta 1 (muscle)	Nonsynon	0.78	The Nicotine System	0	1	3.47	1	0	0	0	0	0	0	0	0	0	0	0	0	0	0	0	0	0	0	0	0	0	0	0	0	0	0	0	0	0	0	0	0	0	0
33949390	12	39000112	.	.	.	.	LRRK2	leucine-rich repeat kinase 2	Nonsynon	0.78	Special	0	1	3.47	0	0	0	0	0	0	0	0	0	0	0	0	0	0	0	0	0	0	0	0	0	0	0	0	0	0	0	0	0	0	0	0	0	0	0
33995463	12	38915703	.	.	.	.	LRRK2	leucine-rich repeat kinase 2	Nonsynon	0.78	Special	0	1	3.47	0	0	0	0	0	0	0	0	0	0	0	0	0	0	0	0	0	0	0	0	0	0	0	0	0	0	0	0	0	0	0	0	0	0	0
33999003	7	150278337	.	.	.	.	KCNH2	potassium voltage-gated channel, subfamily H (eag-related), member 2	Nonsynon	0.78	Special	0	1	3.47	0	0	0	0	0	0	0	0	0	0	0	0	0	0	0	0	0	0	0	0	0	0	0	0	0	0	0	0	0	0	0	0	0	0	0
34042914	22	29985905	.	.	.	.	LIMK2	LIM domain kinase 2	Nonsynon	0.78	Special	0	1	3.47	0	0	0	0	0	0	0	0	0	0	0	0	0	0	0	0	0	0	0	0	0	0	0	0	0	0	0	0	0	0	0	0	0	0	0
34106627	16	82374372	.	.	.	.	CDH13	cadherin 13, H-cadherin (heart)	Nonsynon	0.78	Special	0	1	3.47	0	0	0	0	0	0	0	0	0	0	0	0	0	0	0	0	0	0	0	0	0	0	0	0	0	0	0	0	0	0	0	0	0	0	0
34295816	5	153170909	.	.	.	.	GRIA1	glutamate receptor, ionotropic, AMPA 1	Nonsynon	0.78	The Glutamatergic System	0	1	3.47	0	0	0	0	0	0	0	0	0	0	0	0	0	0	0	0	0	0	0	0	0	0	0	0	0	0	0	0	0	0	0	0	0	0	0
34793603	9	5054883	.	.	.	.	JAK2	Janus kinase 2 (a protein tyrosine kinase)	Nonsynon	0.78	Special	0	1	3.47	0	0	0	0	0	0	0	0	0	0	0	0	0	0	0	0	0	0	0	0	0	0	0	0	0	0	0	0	0	0	0	0	0	0	0
34795646	5	153170857	.	.	.	.	GRIA1	glutamate receptor, ionotropic, AMPA 1	Nonsynon	0.78	The Glutamatergic System	0	1	3.47	0	0	0	0	0	0	0	0	0	0	0	0	0	0	0	0	0	0	0	0	0	0	0	0	0	0	0	0	0	0	0	0	0	0	0
34997685	17	7985306	.	.	.	.	PER1	period homolog 1 (Drosophila)	Nonsynon	0.78	Special	0	1	3.47	0	0	0	0	0	0	0	0	0	0	0	0	0	0	0	0	0	0	0	0	0	0	0	0	0	0	0	0	0	0	0	0	0	0	0
35188899	14	60504735	.	.	.	.	MNAT1	menage a trois homolog 1, cyclin H assembly factor (Xenopus laevis)	Nonsynon	0.78	Special	0	1	3.47	0	0	0	0	0	0	0	0	0	0	0	0	0	0	0	0	0	0	0	0	0	0	0	0	0	0	0	0	0	0	0	0	0	0	0
35274844	5	169743334	.	.	.	.	KCNMB1	potassium large conductance calcium-activated channel, subfamily M, beta member 1	Nonsynon	0.78	Special	0	1	3.47	0	0	0	0	0	0	0	0	0	0	0	0	0	0	0	0	0	0	0	0	0	0	0	0	0	0	0	0	0	0	0	0	0	0	0
35303786	12	39000166	.	.	.	.	LRRK2	leucine-rich repeat kinase 2	Nonsynon	0.78	Special	0	1	3.47	0	0	0	0	0	0	0	0	0	0	0	0	0	0	0	0	0	0	0	0	0	0	0	0	0	0	0	0	0	0	0	0	0	0	0
35315145	5	161453467	.	.	.	.	GABRG2	gamma-aminobutyric acid (GABA) A receptor, gamma 2	Nonsynon	0.78	The GABA System	0	1	3.47	0	0	0	0	0	0	0	0	0	0	0	0	0	0	0	0	0	0	0	0	0	0	0	0	0	0	0	0	0	0	0	0	0	0	0
35548075	5	110810355	.	.	.	.	CAMK4	calcium/calmodulin-dependent protein kinase IV	Nonsynon	0.78	Special	0	1	3.47	0	0	0	0	0	0	0	0	0	0	0	0	0	0	0	0	0	0	0	0	0	0	0	0	0	0	0	0	0	0	0	0	0	0	0
35549391	16	82261920	.	.	.	.	CDH13	cadherin 13, H-cadherin (heart)	Nonsynon	0.78	Special	0	1	3.47	0	0	0	0	0	0	0	0	0	0	0	0	0	0	0	0	0	0	0	0	0	0	0	0	0	0	0	0	0	0	0	0	0	0	0
35602796	12	39003325	.	.	.	.	LRRK2	leucine-rich repeat kinase 2	Nonsynon	0.78	Special	0	1	3.47	0	0	0	0	0	0	0	0	0	0	0	0	0	0	0	0	0	0	0	0	0	0	0	0	0	0	0	0	0	0	0	0	0	0	0
35801418	12	39001183	.	.	.	.	LRRK2	leucine-rich repeat kinase 2	Nonsynon	0.78	Special	0	1	3.47	0	0	0	0	0	0	0	0	0	0	0	0	0	0	0	0	0	0	0	0	0	0	0	0	0	0	0	0	0	0	0	0	0	0	0
35844281	5	149559103	.	.	.	.	SLC6A7	solute carrier family 6 (neurotransmitter transporter, L-proline), member 7	Nonsynon	0.78	Neurotransmitter Transporters	0	1	3.47	0	0	0	0	0	0	0	0	0	0	0	0	0	0	0	0	0	0	0	0	0	0	0	0	0	0	0	0	0	0	0	0	0	0	0
35844880	9	5055003	.	.	.	.	JAK2	Janus kinase 2 (a protein tyrosine kinase)	Nonsynon	0.78	Special	0	1	3.47	0	0	0	0	0	0	0	0	0	0	0	0	0	0	0	0	0	0	0	0	0	0	0	0	0	0	0	0	0	0	0	0	0	0	0
41297895	11	120195828	.	.	.	.	GRIK4	glutamate receptor, ionotropic, kainate 4	Nonsynon	0.78	The Glutamatergic System	0	1	3.47	0	0	0	0	0	0	0	0	0	0	0	0	0	0	0	0	0	0	0	0	0	0	0	0	0	0	0	0	0	0	0	0	0	0	0
45444695	7	45714474	.	.	.	.	ADCY1	adenylate cyclase 1 (brain)	Nonsynon	0.78	Special	0	1	3.47	0	0	0	0	0	0	0	0	0	0	0	0	0	0	0	0	0	0	0	0	0	0	0	0	0	0	0	0	0	0	0	0	0	0	0
45607339	7	150278237	.	.	.	.	KCNH2	potassium voltage-gated channel, subfamily H (eag-related), member 2	Nonsynon	0.78	Special	0	1	3.47	0	0	0	0	0	0	0	0	0	0	0	0	0	0	0	0	0	0	0	0	0	0	0	0	0	0	0	0	0	0	0	0	0	0	0
1610557	19	42334724	.	.	.	.	ZNF585A	zinc finger protein 585A	Nonsynon	0.97		1	8	3.47	0	0	0	0	0	0	0	0	0	0	0	0	0	0	0	0	0	0	0	0	0	0	0	0	0	0	0	0	0	0	0	0	0	0	0
1717065	19	42335240	0	0	0	0	ZNF585A	zinc finger protein 585A	Nonsynon	0.97		1	8	3.47	0	0	0	0	0	0	0	0	1	0	0	0	0	0	0	0	0	0	0	0	0	0	0	0	0	0	0	0	0	0	0	0	0	1	1
4805206	19	42334762	.	.	.	.	ZNF585A	zinc finger protein 585A	Nonsynon	0.97		1	8	3.47	0	0	0	0	0	0	0	0	0	0	0	0	0	0	0	0	0	0	0	0	0	0	0	0	0	0	0	0	0	0	0	0	0	0	0
16972020	19	42335617	0.025	0.083	0.022	0.263	ZNF585A	zinc finger protein 585A	Nonsynon	0.97		1	8	3.47	0	0	0	0	0	0	0	0	0	0	1	0	0	0	1	0	1	0	1	0	0	0	1	0	1	0	1	0	1	0	1	0	1	0	1
17855879	19	42334354	0	0	0	0	ZNF585A	zinc finger protein 585A	Nonsynon	0.97		1	8	3.47	0	0	0	0	0	0	0	0	0	0	0	0	0	0	0	0	0	0	0	0	0	0	0	0	0	0	0	0	0	0	0	0	0	0	0
34483641	19	42335283	.	.	.	.	ZNF585A	zinc finger protein 585A	Nonsynon	0.97		1	8	3.47	0	0	0	0	0	0	0	0	0	0	0	0	0	0	0	0	0	0	0	0	0	0	0	0	0	0	0	0	0	0	0	0	0	0	0
753381	20	39230879	0.455	0.156	0.189	0	PLCG1	phospholipase C, gamma 1	Nonsynon	0.77	Special	0	1	3.46	0	0	1	1	1	1	1	1	1	1	1	1	1	1	1	1	1	1	1	1	1	1	1	1	1	1	1	1	1	1	1	1	1	1	1
1046375	11	118477478	.	.	.	.	DPAGT1	dolichyl-phosphate (UDP-N-acetylglucosamine) N-acetylglucosaminephosphotransferase 1 (GlcNAc-1-P transferase)	Nonsynon	0.77	Special	0	1	3.46	0	0	0	0	0	0	0	0	0	0	0	0	0	0	0	0	0	0	0	0	0	0	0	0	0	0	0	0	0	0	0	0	0	0	0
1802495	9	13097088	.	.	.	.	MPDZ	multiple PDZ domain protein	Nonsynon	0.77	Goldman Gene	0	1	3.46	0	0	0	0	0	0	0	0	0	0	0	0	0	0	0	0	0	0	0	0	0	0	0	0	0	0	0	0	0	0	0	0	0	0	0
2229540	1	45804898	0.044	0	0	0	AKR1A1	aldo-keto reductase family 1, member A1 (aldehyde reductase)	Nonsynon	0.77	The Alcohol System	0	1	3.46	0	0	0	0	0	0	0	0	1	0	0	0	0	0	0	0	0	0	0	0	0	0	0	0	0	0	0	0	0	0	0	0	0	1	1
2230881	5	176792368	.	.	.	.	GRK6	G protein-coupled receptor kinase 6	Nonsynon	0.77	The Adrenergic System	0	1	3.46	0	0	0	0	0	0	0	0	0	0	0	0	0	0	0	0	0	0	0	0	0	0	0	0	0	0	0	0	0	0	0	0	0	0	0
2301149	5	169738534	0.042	0.1	0.174	0.108	KCNMB1	potassium large conductance calcium-activated channel, subfamily M, beta member 1	Nonsynon	0.77	Special	0	1	3.46	0	0	0	0	0	0	0	0	0	0	0	0	1	0	0	0	1	0	0	0	0	0	1	1	1	0	1	1	1	0	1	1	1	0	1
3803430	15	99263338	0.008	0.078	0.068	0.347	ALDH1A3	aldehyde dehydrogenase 1 family, member A3	Nonsynon	0.77	The Alcohol System	0	1	3.46	0	0	0	0	0	0	1	0	1	0	0	0	0	0	1	1	1	0	0	0	0	0	1	1	1	1	1	1	1	0	1	1	1	1	1
4640000	12	38985860	0	0	0	0.025	LRRK2	leucine-rich repeat kinase 2	Nonsynon	0.77	Special	0	1	3.46	0	0	0	0	0	0	0	0	0	0	0	0	0	0	0	0	0	0	0	0	0	0	0	0	0	0	0	0	0	0	0	0	0	0	0
6690497	1	45804908	0	0	0	0	AKR1A1	aldo-keto reductase family 1, member A1 (aldehyde reductase)	Nonsynon	0.77	The Alcohol System	0	1	3.46	0	0	0	0	0	0	0	0	1	0	0	0	0	0	0	0	0	0	0	0	0	0	0	0	0	0	0	0	0	0	0	0	0	1	1
7197352	16	81623320	0	0	0	0	CDH13	cadherin 13, H-cadherin (heart)	Nonsynon	0.77	Special	0	1	3.46	0	0	0	0	0	0	0	0	1	0	0	0	0	0	0	0	0	0	0	0	0	0	0	0	0	0	0	0	0	0	0	0	0	1	1
7499604	16	3768782	0	0	0	0	CREBBP	CREB binding protein (Rubinstein-Taybi syndrome)	Synon	0.77	Special	0	4	3.46	0	0	0	0	0	0	0	0	0	0	0	0	0	0	0	0	0	0	0	0	0	0	0	0	0	0	0	0	0	0	0	0	0	0	0
7705355	5	1278687	.	.	.	.	SLC6A18	solute carrier family 6, member 18	Nonsynon	0.77	Neurotransmitter Transporters	0	1	3.46	0	0	0	0	0	0	0	0	0	0	0	0	0	0	0	0	0	0	0	0	0	0	0	0	0	0	0	0	0	0	0	0	0	0	0
7728667	5	1278626	0.233	0.489	0.398	0.144	SLC6A18	solute carrier family 6, member 18	Nonsynon	0.77	Neurotransmitter Transporters	0	1	3.46	0	0	0	0	0	0	0	0	1	0	0	0	0	0	0	0	1	0	0	0	0	0	0	0	0	0	0	0	0	0	0	0	0	1	1
7970387	12	65072358	0	0.045	0.083	0.325	GRIP1	glutamate receptor interacting protein 1	Nonsynon	0.77	The Glutamatergic System	0	1	3.46	0	0	0	0	0	0	0	0	0	0	0	1	0	0	0	1	0	0	0	0	0	0	0	0	0	0	0	1	1	0	0	1	1	0	0
8178989	10	50498632	0	.	.	0.008	CHAT	choline acetyltransferase	Nonsynon	0.77	Special	0	1	3.46	0	0	0	0	0	0	0	0	0	0	0	0	0	0	0	0	0	0	0	0	0	0	0	0	0	0	0	0	0	0	0	0	0	0	0
8178990	10	50500177	0.083	0	0	0	CHAT	choline acetyltransferase	Nonsynon	0.77	Special	0	1	3.46	0	0	0	0	1	1	1	1	1	0	0	0	0	0	0	0	0	1	1	1	1	1	1	1	1	1	1	1	1	1	1	1	1	1	1
8192492	7	30659687	0	0	0	0	CRHR2	corticotropin releasing hormone receptor 2	Nonsynon	0.77	Goldman Gene	0	1	3.46	0	1	0	0	0	0	0	0	0	0	0	0	0	0	0	0	0	0	0	0	0	0	0	0	0	0	0	0	0	0	0	0	0	0	0
10974946	9	5062579	0	0	0	0	JAK2	Janus kinase 2 (a protein tyrosine kinase)	Nonsynon	0.77	Special	0	1	3.46	0	0	0	0	0	0	0	0	1	0	0	0	0	0	0	0	0	0	0	0	0	0	0	0	0	0	0	0	0	0	0	0	0	1	1
11543905	5	36644349	0	0	0	0	SLC1A3	solute carrier family 1 (glial high affinity glutamate transporter), member 3	Nonsynon	0.77	The Glutamatergic System	0	1	3.46	0	0	0	0	0	0	0	0	0	0	0	0	0	0	0	0	0	0	0	0	0	0	0	0	0	0	0	0	0	0	0	0	0	0	0
11635685	15	40161102	0.345	0.4	0.318	0.085	PLA2G4D	phospholipase A2, group IVD (cytosolic)	Nonsynon	0.77	Special	0	1	3.46	0	0	0	1	0	0	0	0	1	0	1	0	0	1	1	1	1	0	1	0	1	1	1	1	1	1	1	1	1	1	1	1	1	1	1
12424429	12	83790615	0.043	0.011	0.012	0	SLC6A15	solute carrier family 6, member 15	Nonsynon	0.77	Neurotransmitter Transporters	0	1	3.46	0	0	0	1	0	0	0	0	0	0	0	0	0	1	1	1	1	0	0	0	0	0	0	0	0	0	0	0	0	0	0	0	0	0	0
13229961	7	150286182	.	.	.	.	KCNH2	potassium voltage-gated channel, subfamily H (eag-related), member 2	Nonsynon	0.77	Special	0	1	3.46	0	0	0	0	0	0	0	0	0	0	0	0	0	0	0	0	0	0	0	0	0	0	0	0	0	0	0	0	0	0	0	0	0	0	0
13306279	22	18331803	.	.	.	.	COMT	catechol-O-methyltransferase	Nonsynon	0.77	Dopamine Synthesis	0	1	3.46	0	0	0	0	0	0	0	0	0	0	0	0	0	0	0	0	0	0	0	0	0	0	0	0	0	0	0	0	0	0	0	0	0	0	0
17102531	12	65143049	0	0	0	0.059	GRIP1	glutamate receptor interacting protein 1	Nonsynon	0.77	The Glutamatergic System	0	1	3.46	0	0	0	0	0	0	0	0	1	0	0	0	0	0	0	0	0	0	0	0	1	0	0	0	1	0	0	0	1	0	0	0	1	1	1
17466213	12	38988687	0.008	0	0.023	0	LRRK2	leucine-rich repeat kinase 2	Nonsynon	0.77	Special	0	1	3.46	0	0	0	0	0	0	0	0	0	0	0	0	0	0	0	0	0	0	0	0	0	0	0	0	0	0	0	0	0	0	0	0	0	0	0
17490221	9	5062602	0	0	0	0	JAK2	Janus kinase 2 (a protein tyrosine kinase)	Nonsynon	0.77	Special	0	1	3.46	0	0	0	0	0	0	0	0	1	0	0	0	0	0	0	0	0	0	0	0	0	0	0	0	0	0	0	0	0	0	0	0	0	1	1
28365226	12	38988701	0	0	0.023	0	LRRK2	leucine-rich repeat kinase 2	Nonsynon	0.77	Special	0	1	3.46	0	0	0	0	0	0	0	0	0	0	0	0	0	0	0	0	0	0	0	0	0	0	0	0	0	0	0	0	0	0	0	0	0	0	0
28969387	10	135202346	.	.	.	.	CYP2E1	cytochrome P450, family 2, subfamily E, polypeptide 1	Nonsynon	0.77	Goldman Gene	0	1	3.46	0	0	0	0	0	0	0	0	0	0	0	0	0	0	0	0	0	0	0	0	0	0	0	0	0	0	0	0	0	0	0	0	0	0	0
33939927	12	38990503	.	.	.	.	LRRK2	leucine-rich repeat kinase 2	Nonsynon	0.77	Special	0	1	3.46	0	0	0	0	0	0	0	0	0	0	0	0	0	0	0	0	0	0	0	0	0	0	0	0	0	0	0	0	0	0	0	0	0	0	0
34015634	12	39020449	.	.	.	.	LRRK2	leucine-rich repeat kinase 2	Nonsynon	0.77	Special	0	1	3.46	0	0	0	0	0	0	0	0	0	0	0	0	0	0	0	0	0	0	0	0	0	0	0	0	0	0	0	0	0	0	0	0	0	0	0
34424986	6	162126842	.	.	.	.	PARK2	Parkinson disease (autosomal recessive, juvenile) 2, parkin	Nonsynon	0.77	Special	0	1	3.46	0	0	0	0	0	0	0	0	0	0	0	0	0	0	0	0	0	0	0	0	0	0	0	0	0	0	0	0	0	0	0	0	0	0	0
34469326	5	1278603	.	.	.	.	SLC6A18	solute carrier family 6, member 18	Nonsynon	0.77	Neurotransmitter Transporters	0	1	3.46	0	0	0	0	0	0	0	0	0	0	0	0	0	0	0	0	0	0	0	0	0	0	0	0	0	0	0	0	0	0	0	0	0	0	0
34637584	12	39020469	.	.	.	.	LRRK2	leucine-rich repeat kinase 2	Nonsynon	0.77	Special	0	1	3.46	0	0	0	0	0	0	0	0	0	0	0	0	0	0	0	0	0	0	0	0	0	0	0	0	0	0	0	0	0	0	0	0	0	0	0
34778348	12	39043595	.	.	.	.	LRRK2	leucine-rich repeat kinase 2	Nonsynon	0.77	Special	0	1	3.46	0	0	0	0	0	0	0	0	0	0	0	0	0	0	0	0	0	0	0	0	0	0	0	0	0	0	0	0	0	0	0	0	0	0	0
34995376	12	38990504	.	.	.	.	LRRK2	leucine-rich repeat kinase 2	Nonsynon	0.77	Special	0	1	3.46	0	0	0	0	0	0	0	0	0	0	0	0	0	0	0	0	0	0	0	0	0	0	0	0	0	0	0	0	0	0	0	0	0	0	0
35104874	17	62451458	.	.	.	.	CACNG4	calcium channel, voltage-dependent, gamma subunit 4	Nonsynon	0.77	Special	0	1	3.46	0	0	0	0	0	0	0	0	0	0	0	0	0	0	0	0	0	0	0	0	0	0	0	0	0	0	0	0	0	0	0	0	0	0	0
35131940	17	70351136	.	.	.	.	GRIN2C	glutamate receptor, ionotropic, N-methyl D-aspartate 2C	Nonsynon	0.77	The Glutamatergic System	0	1	3.46	0	0	0	0	0	0	0	0	0	0	0	0	0	0	0	0	0	0	0	0	0	0	0	0	0	0	0	0	0	0	0	0	0	0	0
35186416	4	139355214	.	.	.	.	SLC7A11	solute carrier family 7, (cationic amino acid transporter, y+ system) member 11	Nonsynon	0.77	Special	0	1	3.46	0	0	0	0	0	0	0	0	0	0	0	0	0	0	0	0	0	0	0	0	0	0	0	0	0	0	0	0	0	0	0	0	0	0	0
35363614	12	38990568	.	.	.	.	LRRK2	leucine-rich repeat kinase 2	Nonsynon	0.77	Special	0	1	3.46	0	0	0	0	0	0	0	0	0	0	0	0	0	0	0	0	0	0	0	0	0	0	0	0	0	0	0	0	0	0	0	0	0	0	0
35668020	9	5062530	.	.	.	.	JAK2	Janus kinase 2 (a protein tyrosine kinase)	Nonsynon	0.77	Special	0	1	3.46	0	0	0	0	0	0	0	0	0	0	0	0	0	0	0	0	0	0	0	0	0	0	0	0	0	0	0	0	0	0	0	0	0	0	0
35870237	12	39020473	.	.	.	.	LRRK2	leucine-rich repeat kinase 2	Nonsynon	0.77	Special	0	1	3.46	0	0	0	0	0	0	0	0	0	0	0	0	0	0	0	0	0	0	0	0	0	0	0	0	0	0	0	0	0	0	0	0	0	0	0
41265294	9	13207226	.	.	.	.	MPDZ	multiple PDZ domain protein	Nonsynon	0.77	Goldman Gene	0	1	3.46	0	0	0	0	0	0	0	0	0	0	0	0	0	0	0	0	0	0	0	0	0	0	0	0	0	0	0	0	0	0	0	0	0	0	0
41299434	10	135200686	.	.	.	.	CYP2E1	cytochrome P450, family 2, subfamily E, polypeptide 1	Nonsynon	0.77	Goldman Gene	0	1	3.46	0	0	0	0	0	0	0	0	0	0	0	0	0	0	0	0	0	0	0	0	0	0	0	0	0	0	0	0	0	0	0	0	0	0	0
41307319	7	150287654	.	.	.	.	KCNH2	potassium voltage-gated channel, subfamily H (eag-related), member 2	Nonsynon	0.77	Special	0	1	3.46	0	0	0	0	0	0	0	0	0	0	0	0	0	0	0	0	0	0	0	0	0	0	0	0	0	0	0	0	0	0	0	0	0	0	0
41315330	1	1951004	.	.	.	.	GABRD	gamma-aminobutyric acid (GABA) A receptor, delta	Synon	0.77	The GABA System	0	4	3.46	0	0	0	0	0	0	0	0	0	0	0	0	0	0	0	0	0	0	0	0	0	0	0	0	0	0	0	0	0	0	0	0	0	0	0
868749	10	50503668	0	0	0	0.017	CHAT	choline acetyltransferase	Nonsynon	0.76	Special	0	1	3.46	0	0	0	0	0	0	0	0	1	0	0	0	0	0	0	0	0	0	0	0	0	0	0	0	0	0	0	0	0	0	0	0	0	1	1
1050869	3	38025083	.	.	.	.	PLCD1	phospholipase C, delta 1	Nonsynon	0.76	Special	0	1	3.46	0	0	0	0	0	0	0	0	0	0	0	0	0	0	0	0	0	0	0	0	0	0	0	0	0	0	0	0	0	0	0	0	0	0	0
2412983	22	28969905	0	0	0	0	LIF	leukemia inhibitory factor (cholinergic differentiation factor)	Nonsynon	0.76	The Cholinergic System	0	1	3.46	0	0	0	0	0	0	0	0	0	0	0	0	0	0	0	0	0	0	0	0	0	0	0	0	0	0	0	0	0	0	0	0	0	0	0
2839678	10	26599576	.	.	.	.	GAD2	glutamate decarboxylase 2 (pancreatic islets and brain, 65kDa)	Nonsynon	0.76	The Glutamatergic System	0	1	3.46	0	0	0	0	0	0	0	0	0	0	0	0	0	0	0	0	0	0	0	0	0	0	0	0	0	0	0	0	0	0	0	0	0	0	0
3793795	10	50527612	.	.	.	.	CHAT	choline acetyltransferase	Nonsynon	0.76	Special	0	1	3.46	0	0	0	0	0	0	0	0	0	0	0	0	0	0	0	0	0	0	0	0	0	0	0	0	0	0	0	0	0	0	0	0	0	0	0
4073918	5	1297425	0.025	0.284	0.407	0	SLC6A18	solute carrier family 6, member 18	Nonsynon	0.76	Neurotransmitter Transporters	0	1	3.46	0	0	0	0	1	1	1	1	1	0	1	1	0	0	1	1	0	1	1	1	1	1	1	1	1	1	1	1	1	1	1	1	1	1	1
4705426	5	149565218	0	0	0	0	SLC6A7	solute carrier family 6 (neurotransmitter transporter, L-proline), member 7	Nonsynon	0.76	Neurotransmitter Transporters	0	1	3.46	0	0	0	0	0	0	1	0	1	0	0	0	0	0	0	0	0	0	0	0	0	0	0	0	0	1	1	1	1	0	0	0	0	1	1
5820519	17	39438640	.	.	.	.	NAGS	N-acetylglutamate synthase	Nonsynon	0.76	The Glutamatergic System	0	1	3.46	0	0	0	0	0	0	0	0	0	0	0	0	0	0	0	0	0	0	0	0	0	0	0	0	0	0	0	0	0	0	0	0	0	0	0
5848316	3	38024983	.	.	.	.	PLCD1	phospholipase C, delta 1	Nonsynon	0.76	Special	0	1	3.46	0	0	0	0	0	0	0	0	0	0	0	0	0	0	0	0	0	0	0	0	0	0	0	0	0	0	0	0	0	0	0	0	0	0	0
7133914	12	38989178	0.068	0.022	0.193	0.192	LRRK2	leucine-rich repeat kinase 2	Nonsynon	0.76	Special	0	1	3.46	0	0	0	0	0	0	0	0	1	0	0	0	0	1	0	1	0	1	0	1	0	1	0	1	0	1	0	1	0	1	0	1	0	1	1
8192475	15	76698285	0.042	0	0	0	CHRNA3	cholinergic receptor, nicotinic, alpha 3	Nonsynon	0.76	The Nicotine System	0	1	3.46	1	0	1	1	1	1	1	1	1	1	1	1	1	1	1	1	1	1	1	1	1	1	1	1	1	1	1	1	1	1	1	1	1	1	1
8192518	16	74158301	.	.	.	.	GABARAPL2	GABA(A) receptor-associated protein-like 2	Nonsynon	0.76	The GABA System	0	1	3.46	0	0	0	0	0	0	0	0	0	0	0	0	0	0	0	0	0	0	0	0	0	0	0	0	0	0	0	0	0	0	0	0	0	0	0
9988907	11	120358100	0	0	0	0.008	GRIK4	glutamate receptor, ionotropic, kainate 4	Nonsynon	0.76	The Glutamatergic System	0	1	3.46	0	0	0	0	0	0	0	0	1	0	0	0	0	0	0	0	0	0	0	0	0	0	0	0	0	0	0	0	0	0	0	0	0	1	1
11556294	16	74158271	.	.	.	.	GABARAPL2	GABA(A) receptor-associated protein-like 2	Nonsynon	0.76	The GABA System	0	1	3.46	0	0	0	0	0	0	0	0	0	0	0	0	0	0	0	0	0	0	0	0	0	0	0	0	0	0	0	0	0	0	0	0	0	0	0
11575879	17	70357963	.	.	.	.	GRIN2C	glutamate receptor, ionotropic, N-methyl D-aspartate 2C	Nonsynon	0.76	The Glutamatergic System	0	1	3.46	0	0	0	0	0	0	0	0	0	0	0	0	0	0	0	0	0	0	0	0	0	0	0	0	0	0	0	0	0	0	0	0	0	0	0
12899798	15	30180831	0	0	0	0	CHRNA7	cholinergic receptor, nicotinic, alpha 7	Nonsynon	0.76	The Nicotine System	0	1	3.46	0	0	0	0	0	0	0	0	0	0	0	0	0	0	0	0	0	0	0	0	0	0	0	0	0	0	0	0	0	0	0	0	0	0	0
17491187	12	38994170	.	.	.	.	LRRK2	leucine-rich repeat kinase 2	Nonsynon	0.76	Special	0	1	3.46	0	0	0	0	0	0	0	0	0	0	0	0	0	0	0	0	0	0	0	0	0	0	0	0	0	0	0	0	0	0	0	0	0	0	0
17519916	12	38974935	0	0.133	0.114	0	LRRK2	leucine-rich repeat kinase 2	Nonsynon	0.76	Special	0	1	3.46	0	0	0	0	0	0	0	0	1	0	0	0	0	0	0	0	0	0	0	0	0	0	0	0	0	0	0	0	0	0	0	0	0	1	1
17852046	23	43546450	.	.	.	.	MAOB	monoamine oxidase B	Nonsynon	0.76	Tyrosine	0	1	3.46	0	0	0	0	0	0	0	0	0	0	0	0	0	0	0	0	0	0	0	0	0	0	0	0	0	0	0	0	0	0	0	0	0	0	0
17856663	23	43587888	.	.	.	.	MAOB	monoamine oxidase B	Nonsynon	0.76	Tyrosine	0	1	3.46	0	0	0	0	0	0	0	0	0	0	0	0	0	0	0	0	0	0	0	0	0	0	0	0	0	0	0	0	0	0	0	0	0	0	0
33958906	12	38994128	.	.	.	.	LRRK2	leucine-rich repeat kinase 2	Nonsynon	0.76	Special	0	1	3.46	0	0	0	0	0	0	0	0	0	0	0	0	0	0	0	0	0	0	0	0	0	0	0	0	0	0	0	0	0	0	0	0	0	0	0
34410987	12	38963966	.	.	.	.	LRRK2	leucine-rich repeat kinase 2	Nonsynon	0.76	Special	0	1	3.46	0	0	0	0	0	0	0	0	0	0	0	0	0	0	0	0	0	0	0	0	0	0	0	0	0	0	0	0	0	0	0	0	0	0	0
34547495	22	24447343	.	.	.	.	ADRBK2	adrenergic, beta, receptor kinase 2	Synon	0.76	The Adrenergic System	0	4	3.46	0	0	0	0	0	0	0	0	0	0	0	0	0	0	0	0	0	0	0	0	0	0	0	0	0	0	0	0	0	0	0	0	0	0	0
34572680	11	56870685	.	.	.	.	P2RX3	purinergic receptor P2X, ligand-gated ion channel, 3	Nonsynon	0.76	Special	0	1	3.46	0	0	0	0	0	0	0	0	0	0	0	0	0	0	0	0	0	0	0	0	0	0	0	0	0	0	0	0	0	0	0	0	0	0	0
34605667	9	13102024	.	.	.	.	MPDZ	multiple PDZ domain protein	Nonsynon	0.76	Goldman Gene	0	1	3.46	0	0	0	0	0	0	0	0	0	0	0	0	0	0	0	0	0	0	0	0	0	0	0	0	0	0	0	0	0	0	0	0	0	0	0
34808834	17	39439066	.	.	.	.	NAGS	N-acetylglutamate synthase	Nonsynon	0.76	The Glutamatergic System	0	1	3.46	0	0	0	0	0	0	0	0	0	0	0	0	0	0	0	0	0	0	0	0	0	0	0	0	0	0	0	0	0	0	0	0	0	0	0
35095679	11	56871222	.	.	.	.	P2RX3	purinergic receptor P2X, ligand-gated ion channel, 3	Nonsynon	0.76	Special	0	1	3.46	0	0	0	0	0	0	0	0	0	0	0	0	0	0	0	0	0	0	0	0	0	0	0	0	0	0	0	0	0	0	0	0	0	0	0
35173587	12	38964080	.	.	.	.	LRRK2	leucine-rich repeat kinase 2	Nonsynon	0.76	Special	0	1	3.46	0	0	0	0	0	0	0	0	0	0	0	0	0	0	0	0	0	0	0	0	0	0	0	0	0	0	0	0	0	0	0	0	0	0	0
35270792	5	176793554	.	.	.	.	GRK6	G protein-coupled receptor kinase 6	Nonsynon	0.76	The Adrenergic System	0	1	3.46	0	0	0	0	0	0	0	0	0	0	0	0	0	0	0	0	0	0	0	0	0	0	0	0	0	0	0	0	0	0	0	0	0	0	0
35344809	12	38974949	.	.	.	.	LRRK2	leucine-rich repeat kinase 2	Nonsynon	0.76	Special	0	1	3.46	0	0	0	0	0	0	0	0	0	0	0	0	0	0	0	0	0	0	0	0	0	0	0	0	0	0	0	0	0	0	0	0	0	0	0
35464354	12	13652994	.	.	.	.	GRIN2B	glutamate receptor, ionotropic, N-methyl D-aspartate 2B	Nonsynon	0.76	The Glutamatergic System	0	1	3.46	0	0	0	0	0	0	0	0	0	0	0	0	0	0	0	0	0	0	0	0	0	0	0	0	0	0	0	0	0	0	0	0	0	0	0
35507033	12	38994045	.	.	.	.	LRRK2	leucine-rich repeat kinase 2	Nonsynon	0.76	Special	0	1	3.46	0	0	0	0	0	0	0	0	0	0	0	0	0	0	0	0	0	0	0	0	0	0	0	0	0	0	0	0	0	0	0	0	0	0	0
35782218	5	1292586	.	.	.	.	SLC6A18	solute carrier family 6, member 18	Nonsynon	0.76	Neurotransmitter Transporters	0	1	3.46	0	0	0	0	0	0	0	0	0	0	0	0	0	0	0	0	0	0	0	0	0	0	0	0	0	0	0	0	0	0	0	0	0	0	0
35797948	17	35045616	.	.	.	.	PPP1R1B	protein phosphatase 1, regulatory (inhibitor) subunit 1B (dopamine and cAMP regulated phosphoprotein, DARPP-32)	Nonsynon	0.76	The Dopamine System	0	1	3.46	0	0	0	0	0	0	0	0	0	0	0	0	0	0	0	0	0	0	0	0	0	0	0	0	0	0	0	0	0	0	0	0	0	0	0
41275337	5	176796039	.	.	.	.	GRK6	G protein-coupled receptor kinase 6	Nonsynon	0.76	The Adrenergic System	0	1	3.46	0	0	0	0	0	0	0	0	0	0	0	0	0	0	0	0	0	0	0	0	0	0	0	0	0	0	0	0	0	0	0	0	0	0	0
41281637	22	28969993	.	.	.	.	LIF	leukemia inhibitory factor (cholinergic differentiation factor)	Nonsynon	0.76	The Cholinergic System	0	1	3.46	0	0	0	0	0	0	0	0	0	0	0	0	0	0	0	0	0	0	0	0	0	0	0	0	0	0	0	0	0	0	0	0	0	0	0
2855762	8	145071197	.	.	.	.	PLEC1	plectin 1, intermediate filament binding protein 500kDa	Nonsynon	0.95		1	7	3.45	0	0	0	0	0	0	0	0	0	0	0	0	0	0	0	0	0	0	0	0	0	0	0	0	0	0	0	0	0	0	0	0	0	0	0
2855763	8	145071131	.	.	.	.	PLEC1	plectin 1, intermediate filament binding protein 500kDa	Nonsynon	0.95		1	7	3.45	0	0	0	0	0	0	0	0	0	0	0	0	0	0	0	0	0	0	0	0	0	0	0	0	0	0	0	0	0	0	0	0	0	0	0
2855764	8	145070034	.	.	.	.	PLEC1	plectin 1, intermediate filament binding protein 500kDa	Nonsynon	0.95		1	7	3.45	0	0	0	0	0	0	0	0	0	0	0	0	0	0	0	0	0	0	0	0	0	0	0	0	0	0	0	0	0	0	0	0	0	0	0
2857822	8	145071894	.	.	.	.	PLEC1	plectin 1, intermediate filament binding protein 500kDa	Nonsynon	0.95		1	7	3.45	0	0	0	0	0	0	0	0	0	0	0	0	0	0	0	0	0	0	0	0	0	0	0	0	0	0	0	0	0	0	0	0	0	0	0
2857823	8	145071512	.	.	.	.	PLEC1	plectin 1, intermediate filament binding protein 500kDa	Nonsynon	0.95		1	7	3.45	0	0	0	0	0	0	0	0	0	0	0	0	0	0	0	0	0	0	0	0	0	0	0	0	0	0	0	0	0	0	0	0	0	0	0
2857824	8	145071434	.	.	.	.	PLEC1	plectin 1, intermediate filament binding protein 500kDa	Nonsynon	0.95		1	7	3.45	0	0	0	0	0	0	0	0	0	0	0	0	0	0	0	0	0	0	0	0	0	0	0	0	0	0	0	0	0	0	0	0	0	0	0
2857826	8	145071130	.	.	.	.	PLEC1	plectin 1, intermediate filament binding protein 500kDa	Nonsynon	0.95		1	7	3.45	0	0	0	0	0	0	0	0	0	0	0	0	0	0	0	0	0	0	0	0	0	0	0	0	0	0	0	0	0	0	0	0	0	0	0
2857827	8	145070767	.	.	.	.	PLEC1	plectin 1, intermediate filament binding protein 500kDa	Nonsynon	0.95		1	7	3.45	0	0	0	0	0	0	0	0	0	0	0	0	0	0	0	0	0	0	0	0	0	0	0	0	0	0	0	0	0	0	0	0	0	0	0
3731762	2	165655502	0	0.011	0.012	0	SCN3A	sodium channel, voltage-gated, type III, alpha subunit	Nonsynon	0.95	Special	.	.	3.45	0	0	0	1	0	0	0	0	0	0	0	0	0	1	1	1	1	0	0	0	0	0	0	0	0	0	0	0	0	0	0	0	0	0	0
4729542	7	98967080	0	0	0	0	ZFP95	zinc finger with KRAB and SCAN domains 5	Nonsynon	0.95		1	10	3.45	0	0	0	0	0	0	0	0	0	0	0	0	0	0	0	0	0	0	0	0	0	0	0	0	0	0	0	0	0	0	0	0	0	0	0
7002002	8	145069915	.	.	.	.	PLEC1	plectin 1, intermediate filament binding protein 500kDa	Nonsynon	0.95		1	7	3.45	0	0	0	0	0	0	0	0	0	0	0	0	0	0	0	0	0	0	0	0	0	0	0	0	0	0	0	0	0	0	0	0	0	0	0
8044440	16	71379415	0	0	0	0	ATBF1	zinc finger homeobox 3	Nonsynon	0.95		1	9	3.45	0	0	0	0	0	0	0	0	0	0	0	0	0	0	0	0	0	0	0	0	0	0	0	0	0	0	0	0	0	0	0	0	0	0	0
17411397	19	46210456	.	.	.	.	CYP2B6	cytochrome P450, family 2, subfamily B, polypeptide 6	Nonsynon	0.95	The Nicotine Metabolism System	.	.	3.45	0	0	0	0	0	0	0	0	0	0	0	0	0	0	0	0	0	0	0	0	0	0	0	0	0	0	0	0	0	0	0	0	0	0	0
17852830	7	98967665	.	.	.	.	ZFP95	zinc finger with KRAB and SCAN domains 5	Nonsynon	0.95		1	10	3.45	0	0	0	0	0	0	0	0	0	0	0	0	0	0	0	0	0	0	0	0	0	0	0	0	0	0	0	0	0	0	0	0	0	0	0
28399499	19	46210061	.	.	.	.	CYP2B6	cytochrome P450, family 2, subfamily B, polypeptide 6	Nonsynon	0.95	The Nicotine Metabolism System	.	.	3.45	1	0	0	0	0	0	0	0	0	0	0	0	0	0	0	0	0	0	0	0	0	0	0	0	0	0	0	0	0	0	0	0	0	0	0
28411998	7	98967025	.	.	.	.	ZFP95	zinc finger with KRAB and SCAN domains 5	Nonsynon	0.95		1	10	3.45	0	0	0	0	0	0	0	0	0	0	0	0	0	0	0	0	0	0	0	0	0	0	0	0	0	0	0	0	0	0	0	0	0	0	0
34097093	19	46210210	.	.	.	.	CYP2B6	cytochrome P450, family 2, subfamily B, polypeptide 6	Nonsynon	0.95	The Nicotine Metabolism System	.	.	3.45	0	0	0	0	0	0	0	0	0	0	0	0	0	0	0	0	0	0	0	0	0	0	0	0	0	0	0	0	0	0	0	0	0	0	0
34826503	19	46210084	.	.	.	.	CYP2B6	cytochrome P450, family 2, subfamily B, polypeptide 6	Nonsynon	0.95	The Nicotine Metabolism System	.	.	3.45	0	0	0	0	0	0	0	0	0	0	0	0	0	0	0	0	0	0	0	0	0	0	0	0	0	0	0	0	0	0	0	0	0	0	0
34893635	8	145070048	.	.	.	.	PLEC1	plectin 1, intermediate filament binding protein 500kDa	Nonsynon	0.95		1	7	3.45	0	0	0	0	0	0	0	0	0	0	0	0	0	0	0	0	0	0	0	0	0	0	0	0	0	0	0	0	0	0	0	0	0	0	0
35010098	19	46210548	.	.	.	.	CYP2B6	cytochrome P450, family 2, subfamily B, polypeptide 6	Nonsynon	0.95	The Nicotine Metabolism System	.	.	3.45	0	0	0	0	0	0	0	0	0	0	0	0	0	0	0	0	0	0	0	0	0	0	0	0	0	0	0	0	0	0	0	0	0	0	0
35091646	1	22045620	.	.	.	.	HSPG2	heparan sulfate proteoglycan 2	Nonsynon	0.95		1	6	3.45	0	0	0	0	0	0	0	0	0	0	0	0	0	0	0	0	0	0	0	0	0	0	0	0	0	0	0	0	0	0	0	0	0	0	0
35773040	19	46202126	.	.	.	.	CYP2B6	cytochrome P450, family 2, subfamily B, polypeptide 6	Nonsynon	0.95	The Nicotine Metabolism System	.	.	3.45	0	0	0	0	0	0	0	0	0	0	0	0	0	0	0	0	0	0	0	0	0	0	0	0	0	0	0	0	0	0	0	0	0	0	0
35912214	2	165655670	.	.	.	.	SCN3A	sodium channel, voltage-gated, type III, alpha subunit	Nonsynon	0.95	Special	.	.	3.45	0	0	0	0	0	0	0	0	0	0	0	0	0	0	0	0	0	0	0	0	0	0	0	0	0	0	0	0	0	0	0	0	0	0	0
35979566	19	46210438	.	.	.	.	CYP2B6	cytochrome P450, family 2, subfamily B, polypeptide 6	Nonsynon	0.95	The Nicotine Metabolism System	.	.	3.45	0	0	0	0	0	0	0	0	0	0	0	0	0	0	0	0	0	0	0	0	0	0	0	0	0	0	0	0	0	0	0	0	0	0	0
36060847	19	46201870	.	.	.	.	CYP2B6	cytochrome P450, family 2, subfamily B, polypeptide 6	Nonsynon	0.95	The Nicotine Metabolism System	.	.	3.45	0	0	0	0	0	0	0	0	0	0	0	0	0	0	0	0	0	0	0	0	0	0	0	0	0	0	0	0	0	0	0	0	0	0	0
41265137	2	165655325	.	.	.	.	SCN3A	sodium channel, voltage-gated, type III, alpha subunit	Nonsynon	0.95	Special	.	.	3.45	0	0	0	0	0	0	0	0	0	0	0	0	0	0	0	0	0	0	0	0	0	0	0	0	0	0	0	0	0	0	0	0	0	0	0
45466193	19	46210126	.	.	.	.	CYP2B6	cytochrome P450, family 2, subfamily B, polypeptide 6	Nonsynon	0.95	The Nicotine Metabolism System	.	.	3.45	0	0	0	0	0	0	0	0	0	0	0	0	0	0	0	0	0	0	0	0	0	0	0	0	0	0	0	0	0	0	0	0	0	0	0
129974	16	3735293	0	0.2	0.08	0.034	CREBBP	CREB binding protein (Rubinstein-Taybi syndrome)	Synon	0.75	Special	0	4	3.45	0	0	0	1	0	0	0	0	0	0	1	1	0	1	1	1	1	0	0	0	0	0	1	1	0	0	1	1	0	0	1	1	0	0	1
130003	16	3768173	0.017	0	0	0	CREBBP	CREB binding protein (Rubinstein-Taybi syndrome)	Synon	0.75	Special	0	4	3.45	0	0	0	0	0	0	0	0	1	0	0	0	0	0	0	0	0	0	0	0	0	0	0	0	0	0	0	0	0	0	0	0	0	1	1
1045914	19	60379247	.	.	.	.	SYT5	synaptotagmin V	Nonsynon	0.75	Special	0	1	3.45	0	0	0	0	0	0	0	0	0	0	0	0	0	0	0	0	0	0	0	0	0	0	0	0	0	0	0	0	0	0	0	0	0	0	0
1045915	19	60378969	.	.	.	.	SYT5	synaptotagmin V	Nonsynon	0.75	Special	0	1	3.45	0	0	0	0	0	0	0	0	0	0	0	0	0	0	0	0	0	0	0	0	0	0	0	0	0	0	0	0	0	0	0	0	0	0	0
1468564	5	149562405	0	0	0	0	SLC6A7	solute carrier family 6 (neurotransmitter transporter, L-proline), member 7	Nonsynon	0.75	Neurotransmitter Transporters	0	1	3.45	0	0	0	0	0	0	0	0	1	0	0	0	0	0	0	0	0	0	0	0	0	0	0	0	0	0	0	0	0	0	0	0	0	1	1
1801334	6	161701215	0.058	0	0	0.017	PARK2	Parkinson disease (autosomal recessive, juvenile) 2, parkin	Nonsynon	0.75	Special	0	1	3.45	0	0	0	1	0	0	0	0	0	0	0	0	0	1	1	1	1	1	0	0	0	1	0	0	0	1	0	0	0	1	0	0	0	1	0
1805123	7	150276467	.	.	.	0.017	KCNH2	potassium voltage-gated channel, subfamily H (eag-related), member 2	Nonsynon	0.75	Special	0	1	3.45	0	0	0	0	0	0	1	0	1	0	0	0	0	0	0	0	0	0	0	0	0	0	0	0	0	1	1	1	1	0	0	0	0	1	1
2033652	2	24917999	.	.	.	.	ADCY3	adenylate cyclase 3	Nonsynon	0.75	Special	0	1	3.45	0	0	0	0	0	0	0	0	0	0	0	0	0	0	0	0	0	0	0	0	0	0	0	0	0	0	0	0	0	0	0	0	0	0	0
2074734	22	29865995	0.042	0.4	0.455	0.133	PLA2G3	phospholipase A2, group III	Nonsynon	0.75	Special	0	1	3.45	0	0	0	0	0	0	0	0	1	0	1	1	0	0	1	1	0	0	1	1	0	0	1	1	0	0	1	1	0	0	1	1	0	1	1
2074735	22	29865872	0.042	0.356	0.409	0	PLA2G3	phospholipase A2, group III	Nonsynon	0.75	Special	0	1	3.45	0	0	0	0	0	0	0	0	0	0	1	1	0	0	1	1	0	0	1	1	0	0	1	1	0	0	1	1	0	0	1	1	0	0	1
2232176	22	29866133	0.233	0.125	0.057	0.358	PLA2G3	phospholipase A2, group III	Nonsynon	0.75	Special	0	1	3.45	0	0	0	0	1	1	1	1	1	1	0	0	0	1	1	1	1	1	1	1	1	1	1	1	1	1	1	1	1	1	1	1	1	1	1
2274648	9	13112136	0	0	0.012	0	MPDZ	multiple PDZ domain protein	Nonsynon	0.75	Goldman Gene	0	1	3.45	0	0	0	0	0	0	0	0	0	0	0	0	0	0	0	0	0	0	0	0	0	0	0	0	0	0	0	0	0	0	0	0	0	0	0
3729781	3	139896318	0	0	0	0	PIK3CB	phosphoinositide-3-kinase, catalytic, beta polypeptide	Nonsynon	0.75	Special	0	1	3.45	0	0	0	0	0	0	0	0	1	0	0	0	0	0	0	0	0	0	0	0	0	0	0	0	0	0	0	0	0	0	0	0	0	1	1
3761863	12	39044919	0.333	0.378	0.466	0.492	LRRK2	leucine-rich repeat kinase 2	Nonsynon	0.75	Special	0	1	3.45	0	0	0	1	1	1	1	1	1	0	1	1	0	1	1	1	1	1	1	1	1	1	1	1	1	1	1	1	1	1	1	1	1	1	1
5997917	22	29951792	0.158	0	0	0.392	LIMK2	LIM domain kinase 2	Nonsynon	0.75	Special	0	1	3.45	0	0	0	0	1	1	1	1	1	1	0	0	1	1	0	0	1	1	1	1	1	1	1	1	1	1	1	1	1	1	1	1	1	1	1
7524148	1	46651378	0	0	0	0	FAAH	fatty acid amide hydrolase	Nonsynon	0.75	Special	0	1	3.45	0	1	0	0	0	0	0	0	0	0	0	0	0	0	0	0	0	0	0	0	0	0	0	0	0	0	0	0	0	0	0	0	0	0	0
8190591	10	26545778	.	.	.	.	GAD2	glutamate decarboxylase 2 (pancreatic islets and brain, 65kDa)	Nonsynon	0.75	The Glutamatergic System	0	1	3.45	0	0	0	0	0	0	0	0	0	0	0	0	0	0	0	0	0	0	0	0	0	0	0	0	0	0	0	0	0	0	0	0	0	0	0
8190730	10	26602602	0	0	0	0	GAD2	glutamate decarboxylase 2 (pancreatic islets and brain, 65kDa)	Nonsynon	0.75	The Glutamatergic System	0	1	3.45	0	0	0	0	0	0	0	0	1	0	0	0	0	0	0	0	0	0	0	0	0	0	0	0	0	0	0	0	0	0	0	0	0	1	1
8192498	7	30668337	.	.	.	.	CRHR2	corticotropin releasing hormone receptor 2	Nonsynon	0.75	Goldman Gene	0	1	3.45	0	1	0	0	0	0	0	0	0	0	0	0	0	0	0	0	0	0	0	0	0	0	0	0	0	0	0	0	0	0	0	0	0	0	0
9456735	6	162395157	0	0	0	0.05	PARK2	Parkinson disease (autosomal recessive, juvenile) 2, parkin	Nonsynon	0.75	Special	0	1	3.45	0	0	0	0	0	0	0	0	1	0	0	0	0	0	0	0	0	0	0	0	0	0	0	0	0	0	0	0	0	0	0	0	0	1	1
10878307	12	38958256	0.092	0	0.034	0	LRRK2	leucine-rich repeat kinase 2	Nonsynon	0.75	Special	0	1	3.45	0	0	0	0	1	1	1	1	1	0	0	0	0	0	0	0	0	1	1	1	1	1	1	1	1	1	1	1	1	1	1	1	1	1	1
11229007	11	56873924	0	0	0	0	P2RX3	purinergic receptor P2X, ligand-gated ion channel, 3	Nonsynon	0.75	Special	0	1	3.45	0	0	0	0	0	0	0	0	0	0	0	0	0	0	0	0	0	0	0	0	0	0	0	0	0	0	0	0	0	0	0	0	0	0	0
11542503	19	60379225	0	0	0	0.129	SYT5	synaptotagmin V	Nonsynon	0.75	Special	0	1	3.45	0	0	0	1	0	0	0	0	1	0	0	0	0	1	1	1	1	0	0	0	0	0	0	0	0	0	0	0	0	0	0	0	0	1	1
16829208	2	233117360	.	.	.	.	CHRNG	cholinergic receptor, nicotinic, gamma	Nonsynon	0.75	The Nicotine System	0	1	3.45	1	0	0	0	0	0	0	0	0	0	0	0	0	0	0	0	0	0	0	0	0	0	0	0	0	0	0	0	0	0	0	0	0	0	0
16921449	9	4534624	0	0	0	0.052	SLC1A1	solute carrier family 1 (neuronal/epithelial high affinity glutamate transporter, system Xag), member 1	Nonsynon	0.75	The Glutamatergic System	0	1	3.45	0	0	0	0	0	0	0	0	0	0	0	0	0	0	0	0	0	0	0	0	0	0	0	0	0	0	0	0	0	0	0	0	0	0	0
28398772	1	1951326	.	.	.	.	GABRD	gamma-aminobutyric acid (GABA) A receptor, delta	Synon	0.75	The GABA System	0	4	3.45	0	0	0	0	0	0	0	0	0	0	0	0	0	0	0	0	0	0	0	0	0	0	0	0	0	0	0	0	0	0	0	0	0	0	0
28408173	1	1950534	.	.	.	.	GABRD	gamma-aminobutyric acid (GABA) A receptor, delta	Synon	0.75	The GABA System	0	4	3.45	0	0	0	0	0	0	0	0	0	0	0	0	0	0	0	0	0	0	0	0	0	0	0	0	0	0	0	0	0	0	0	0	0	0	0
28437090	1	1948882	.	.	.	.	GABRD	gamma-aminobutyric acid (GABA) A receptor, delta	Synon	0.75	The GABA System	0	4	3.45	0	0	0	0	0	0	0	0	0	0	0	0	0	0	0	0	0	0	0	0	0	0	0	0	0	0	0	0	0	0	0	0	0	0	0
34016441	12	83794453	.	.	.	.	SLC6A15	solute carrier family 6, member 15	Nonsynon	0.75	Neurotransmitter Transporters	0	1	3.45	0	0	0	0	0	0	0	0	0	0	0	0	0	0	0	0	0	0	0	0	0	0	0	0	0	0	0	0	0	0	0	0	0	0	0
34233854	9	4563968	.	.	.	.	SLC1A1	solute carrier family 1 (neuronal/epithelial high affinity glutamate transporter, system Xag), member 1	Nonsynon	0.75	The Glutamatergic System	0	1	3.45	0	0	0	0	0	0	0	0	0	0	0	0	0	0	0	0	0	0	0	0	0	0	0	0	0	0	0	0	0	0	0	0	0	0	0
34630130	2	233117331	.	.	.	.	CHRNG	cholinergic receptor, nicotinic, gamma	Nonsynon	0.75	The Nicotine System	0	1	3.45	0	0	0	0	0	0	0	0	0	0	0	0	0	0	0	0	0	0	0	0	0	0	0	0	0	0	0	0	0	0	0	0	0	0	0
34757167	4	139372985	.	.	.	.	SLC7A11	solute carrier family 7, (cationic amino acid transporter, y+ system) member 11	Nonsynon	0.75	Special	0	1	3.45	0	0	0	0	0	0	0	0	0	0	0	0	0	0	0	0	0	0	0	0	0	0	0	0	0	0	0	0	0	0	0	0	0	0	0
34916191	12	131708136	.	.	.	.	P2RX2	purinergic receptor P2X, ligand-gated ion channel, 2	Nonsynon	0.75	Special	0	1	3.45	0	0	0	0	0	0	0	0	0	0	0	0	0	0	0	0	0	0	0	0	0	0	0	0	0	0	0	0	0	0	0	0	0	0	0
34930775	22	29988205	.	.	.	.	LIMK2	LIM domain kinase 2	Nonsynon	0.75	Special	0	1	3.45	0	0	0	0	0	0	0	0	0	0	0	0	0	0	0	0	0	0	0	0	0	0	0	0	0	0	0	0	0	0	0	0	0	0	0
35316157	12	39044934	.	.	.	.	LRRK2	leucine-rich repeat kinase 2	Nonsynon	0.75	Special	0	1	3.45	0	0	0	0	0	0	0	0	0	0	0	0	0	0	0	0	0	0	0	0	0	0	0	0	0	0	0	0	0	0	0	0	0	0	0
35484016	19	60378969	.	.	.	.	SYT5	synaptotagmin V	Nonsynon	0.75	Special	0	1	3.45	0	0	0	0	0	0	0	0	0	0	0	0	0	0	0	0	0	0	0	0	0	0	0	0	0	0	0	0	0	0	0	0	0	0	0
35611877	12	38958212	.	.	.	.	LRRK2	leucine-rich repeat kinase 2	Nonsynon	0.75	Special	0	1	3.45	0	0	0	0	0	0	0	0	0	0	0	0	0	0	0	0	0	0	0	0	0	0	0	0	0	0	0	0	0	0	0	0	0	0	0
35761003	12	83794407	.	.	.	.	SLC6A15	solute carrier family 6, member 15	Nonsynon	0.75	Neurotransmitter Transporters	0	1	3.45	0	0	0	0	0	0	0	0	0	0	0	0	0	0	0	0	0	0	0	0	0	0	0	0	0	0	0	0	0	0	0	0	0	0	0
35864133	7	45684076	.	.	.	.	ADCY1	adenylate cyclase 1 (brain)	Nonsynon	0.75	Special	0	1	3.45	0	0	0	0	0	0	0	0	0	0	0	0	0	0	0	0	0	0	0	0	0	0	0	0	0	0	0	0	0	0	0	0	0	0	0
35873680	1	45807220	.	.	.	.	AKR1A1	aldo-keto reductase family 1, member A1 (aldehyde reductase)	Nonsynon	0.75	The Alcohol System	0	1	3.45	0	0	0	0	0	0	0	0	0	0	0	0	0	0	0	0	0	0	0	0	0	0	0	0	0	0	0	0	0	0	0	0	0	0	0
35923988	22	29984293	.	.	.	.	LIMK2	LIM domain kinase 2	Nonsynon	0.75	Special	0	1	3.45	0	0	0	0	0	0	0	0	0	0	0	0	0	0	0	0	0	0	0	0	0	0	0	0	0	0	0	0	0	0	0	0	0	0	0
41314354	7	150276540	.	.	.	.	KCNH2	potassium voltage-gated channel, subfamily H (eag-related), member 2	Nonsynon	0.75	Special	0	1	3.45	0	0	0	0	0	0	0	0	0	0	0	0	0	0	0	0	0	0	0	0	0	0	0	0	0	0	0	0	0	0	0	0	0	0	0
2279343	19	46207103	.	.	.	.	CYP2B6	cytochrome P450, family 2, subfamily B, polypeptide 6	Nonsynon	0.94	The Nicotine Metabolism System	.	.	3.44	1	0	0	0	0	0	0	0	0	0	0	0	0	0	0	0	0	0	0	0	0	0	0	0	0	0	0	0	0	0	0	0	0	0	0
3749029	2	166556260	0	0	0	0	SCN1A	sodium channel, voltage-gated, type I, alpha subunit	Nonsynon	0.94	Special	.	.	3.44	0	0	0	0	0	0	0	0	1	0	0	0	0	0	0	0	0	0	0	0	0	0	0	0	0	0	0	0	0	0	0	0	0	1	1
11554940	19	53810989	.	.	.	.	RPL18	ribosomal protein L18	Nonsynon	0.94		1	6	3.44	0	0	0	0	0	0	0	0	0	0	0	0	0	0	0	0	0	0	0	0	0	0	0	0	0	0	0	0	0	0	0	0	0	0	0
11714441	3	124641636	.	.	.	.	ADCY5	adenylate cyclase 5	Intron	0.94	Special	1	7	3.44	0	0	0	0	0	0	0	0	0	0	0	0	0	0	0	0	0	0	0	0	0	0	0	0	0	0	0	0	0	0	0	0	0	0	0
13333232	16	71549718	.	.	.	.	ATBF1	zinc finger homeobox 3	Nonsynon	0.94		1	9	3.44	0	0	0	0	0	0	0	0	0	0	0	0	0	0	0	0	0	0	0	0	0	0	0	0	0	0	0	0	0	0	0	0	0	0	0
34619521	3	124641558	.	.	.	.	ADCY5	adenylate cyclase 5	Intron	0.94	Special	1	7	3.44	0	0	0	0	0	0	0	0	0	0	0	0	0	0	0	0	0	0	0	0	0	0	0	0	0	0	0	0	0	0	0	0	0	0	0
34646544	19	46207087	.	.	.	.	CYP2B6	cytochrome P450, family 2, subfamily B, polypeptide 6	Nonsynon	0.94	The Nicotine Metabolism System	.	.	3.44	0	0	0	0	0	0	0	0	0	0	0	0	0	0	0	0	0	0	0	0	0	0	0	0	0	0	0	0	0	0	0	0	0	0	0
35669711	1	22051831	.	.	.	.	HSPG2	heparan sulfate proteoglycan 2	Nonsynon	0.94		1	6	3.44	0	0	0	0	0	0	0	0	0	0	0	0	0	0	0	0	0	0	0	0	0	0	0	0	0	0	0	0	0	0	0	0	0	0	0
35735053	2	166556167	.	.	.	.	SCN1A	sodium channel, voltage-gated, type I, alpha subunit	Nonsynon	0.94	Special	.	.	3.44	0	0	0	0	0	0	0	0	0	0	0	0	0	0	0	0	0	0	0	0	0	0	0	0	0	0	0	0	0	0	0	0	0	0	0
35761080	2	165954191	.	.	.	.	SCN2A2	sodium channel, voltage-gated, type II, alpha subunit	Nonsynon	0.94	Special	.	.	3.44	0	0	0	0	0	0	0	0	0	0	0	0	0	0	0	0	0	0	0	0	0	0	0	0	0	0	0	0	0	0	0	0	0	0	0
45482602	19	46207095	.	.	.	.	CYP2B6	cytochrome P450, family 2, subfamily B, polypeptide 6	Nonsynon	0.94	The Nicotine Metabolism System	.	.	3.44	0	0	0	0	0	0	0	0	0	0	0	0	0	0	0	0	0	0	0	0	0	0	0	0	0	0	0	0	0	0	0	0	0	0	0
4680	22	18331271	0.483	0.256	0.239	0.292	COMT	catechol-O-methyltransferase	Nonsynon	0.74	Dopamine Synthesis	0	1	3.44	1	1	0	1	1	1	1	1	1	1	1	1	0	1	1	1	1	1	1	1	1	1	1	1	1	1	1	1	1	1	1	1	1	1	1
6267	22	18330263	0	0.057	0.068	0	COMT	catechol-O-methyltransferase	Nonsynon	0.74	Dopamine Synthesis	0	1	3.44	1	1	0	0	0	0	0	0	1	0	0	0	0	0	0	0	0	0	0	0	0	0	0	0	0	0	0	0	0	0	0	0	0	1	1
6270	22	18330150	0	0	0	0	COMT	catechol-O-methyltransferase	Nonsynon	0.74	Dopamine Synthesis	0	1	3.44	1	0	0	0	0	0	0	0	0	0	0	0	0	0	0	0	0	0	0	0	0	0	0	0	0	0	0	0	0	0	0	0	0	0	0
15566	14	73597153	0	0	0	0	ALDH6A1	aldehyde dehydrogenase 6 family, member A1	Nonsynon	0.74	The Alcohol System	0	1	3.44	0	0	0	0	0	0	1	0	1	0	0	0	0	0	0	0	0	0	0	0	0	0	0	0	0	1	1	1	1	0	0	0	0	1	1
1805000	11	6237843	.	.	.	.	CCKBR	cholecystokinin B receptor	Nonsynon	0.74	Goldman Gene	0	1	3.44	0	0	0	0	0	0	0	0	0	0	0	0	0	0	0	0	0	0	0	0	0	0	0	0	0	0	0	0	0	0	0	0	0	0	0
2232183	22	29862960	0.212	0.033	0.011	0.059	PLA2G3	phospholipase A2, group III	Nonsynon	0.74	Special	0	1	3.44	0	0	0	0	1	1	1	1	1	0	0	0	0	0	0	0	0	1	1	1	1	1	1	1	1	1	1	1	1	1	1	1	1	1	1
4986871	22	18331236	.	0	0	0	COMT	catechol-O-methyltransferase	Nonsynon	0.74	Dopamine Synthesis	0	1	3.44	1	0	0	0	0	0	0	0	0	0	0	0	0	0	0	0	0	0	0	0	0	0	0	0	0	0	0	0	0	0	0	0	0	0	0
5031015	22	18331103	0	0	0	0.025	COMT	catechol-O-methyltransferase	Nonsynon	0.74	Dopamine Synthesis	0	1	3.44	1	1	0	0	0	0	0	0	1	0	0	0	0	0	0	0	0	0	0	0	0	0	0	0	0	0	0	0	0	0	0	0	0	1	1
5789452	11	6237783	.	.	.	.	CCKBR	cholecystokinin B receptor	Nonsynon	0.74	Goldman Gene	0	1	3.44	0	0	0	0	0	0	0	0	0	0	0	0	0	0	0	0	0	0	0	0	0	0	0	0	0	0	0	0	0	0	0	0	0	0	0
6413419	10	135195665	0	0	0	.	CYP2E1	cytochrome P450, family 2, subfamily E, polypeptide 1	Nonsynon	0.74	Goldman Gene	0	1	3.44	0	1	0	0	0	0	1	0	1	0	0	0	0	0	0	0	0	0	0	0	0	0	0	0	0	1	1	1	1	0	0	0	0	1	1
6671692	1	169443503	0	0	0	0.175	FMO2	flavin containing monooxygenase 2 (non-functional)	Synon	0.74	The Nicotine Metabolism System	0	4	3.44	0	0	0	0	0	0	1	0	1	0	0	0	1	0	0	0	1	0	0	0	0	0	0	0	1	1	1	1	1	0	0	0	1	1	1
7442098	4	139382508	0	0	0	0	SLC7A11	solute carrier family 7, (cationic amino acid transporter, y+ system) member 11	Nonsynon	0.74	Special	0	1	3.44	0	0	0	0	0	0	0	0	0	0	0	0	0	0	0	0	0	0	0	0	0	0	0	0	0	0	0	0	0	0	0	0	0	0	0
12094805	1	46647391	0	0	0	0	FAAH	fatty acid amide hydrolase	Nonsynon	0.74	Special	0	1	3.44	0	0	0	0	0	0	0	0	1	0	0	0	0	0	0	0	0	0	0	0	0	0	0	0	0	0	0	0	0	0	0	0	0	1	1
12986002	19	951785	.	.	.	.	GRIN3B	glutamate receptor, ionotropic, N-methyl-D-aspartate 3B	Nonsynon	0.74	The Glutamatergic System	0	1	3.44	0	0	0	0	0	0	0	0	0	0	0	0	0	0	0	0	0	0	0	0	0	0	0	0	0	0	0	0	0	0	0	0	0	0	0
13306281	22	18330323	0	0	0	0	COMT	catechol-O-methyltransferase	Nonsynon	0.74	Dopamine Synthesis	0	1	3.44	0	0	0	0	0	0	0	0	1	0	0	0	0	0	0	0	0	0	0	0	0	0	0	0	0	0	0	0	0	0	0	0	0	1	1
16930134	9	13113295	0	0	0	0.067	MPDZ	multiple PDZ domain protein	Nonsynon	0.74	Goldman Gene	0	1	3.44	0	1	0	1	0	0	0	0	1	0	0	0	0	1	1	1	1	0	0	0	0	0	0	0	0	0	0	0	0	0	0	0	0	1	1
34342853	9	4566045	.	.	.	.	SLC1A1	solute carrier family 1 (neuronal/epithelial high affinity glutamate transporter, system Xag), member 1	Nonsynon	0.74	The Glutamatergic System	0	1	3.44	0	0	0	0	0	0	0	0	0	0	0	0	0	0	0	0	0	0	0	0	0	0	0	0	0	0	0	0	0	0	0	0	0	0	0
34789226	4	56024663	.	.	.	.	CLOCK	clock homolog (mouse)	Nonsynon	0.74	Special	0	1	3.44	0	0	0	0	0	0	0	0	0	0	0	0	0	0	0	0	0	0	0	0	0	0	0	0	0	0	0	0	0	0	0	0	0	0	0
35423850	4	56024657	.	.	.	.	CLOCK	clock homolog (mouse)	Nonsynon	0.74	Special	0	1	3.44	0	0	0	0	0	0	0	0	0	0	0	0	0	0	0	0	0	0	0	0	0	0	0	0	0	0	0	0	0	0	0	0	0	0	0
35658131	12	39031792	.	.	.	.	LRRK2	leucine-rich repeat kinase 2	Nonsynon	0.74	Special	0	1	3.44	0	0	0	0	0	0	0	0	0	0	0	0	0	0	0	0	0	0	0	0	0	0	0	0	0	0	0	0	0	0	0	0	0	0	0
35715771	17	3766216	.	.	.	.	P2RX1	purinergic receptor P2X, ligand-gated ion channel, 1	Nonsynon	0.74	Special	0	1	3.44	0	0	0	0	0	0	0	0	0	0	0	0	0	0	0	0	0	0	0	0	0	0	0	0	0	0	0	0	0	0	0	0	0	0	0
36050417	4	65914281	.	.	.	.	EPHA5	EPH receptor A5	Nonsynon	0.74	Special	0	1	3.44	0	0	0	0	0	0	0	0	0	0	0	0	0	0	0	0	0	0	0	0	0	0	0	0	0	0	0	0	0	0	0	0	0	0	0
41299426	10	135196192	.	.	.	.	CYP2E1	cytochrome P450, family 2, subfamily E, polypeptide 1	Nonsynon	0.74	Goldman Gene	0	1	3.44	0	0	0	0	0	0	0	0	0	0	0	0	0	0	0	0	0	0	0	0	0	0	0	0	0	0	0	0	0	0	0	0	0	0	0
1042109	11	35284295	.	.	.	.	SLC1A2	solute carrier family 1 (glial high affinity glutamate transporter), member 2	Nonsynon	0.73	The Glutamatergic System	0	1	3.43	0	0	0	0	0	0	0	0	0	0	0	0	0	0	0	0	0	0	0	0	0	0	0	0	0	0	0	0	0	0	0	0	0	0	0
2301279	19	60382210	0	0	0.012	0	SYT5	synaptotagmin V	Nonsynon	0.73	Special	0	1	3.43	0	0	0	0	0	0	0	0	1	0	0	0	0	0	0	0	0	0	0	0	0	0	0	0	0	0	0	0	0	0	0	0	0	1	1
3729778	3	139908785	0	0	0	0	PIK3CB	phosphoinositide-3-kinase, catalytic, beta polypeptide	Nonsynon	0.73	Special	0	1	3.43	0	0	0	0	0	0	0	0	1	0	0	0	0	0	0	0	0	0	0	0	0	0	0	0	0	0	0	0	0	0	0	0	0	1	1
4790235	17	4746831	0.042	0	0	0	CHRNE	cholinergic receptor, nicotinic, epsilon	Nonsynon	0.73	The Nicotine System	0	1	3.43	1	0	0	0	1	1	1	1	1	0	0	0	0	0	0	0	0	1	1	1	1	1	1	1	1	1	1	1	1	1	1	1	1	1	1
7447815	5	1293757	0.4	0.2	0.375	0.333	SLC6A18	solute carrier family 6, member 18	Nonsynon	0.73	Neurotransmitter Transporters	0	1	3.43	0	0	0	0	0	0	1	0	1	1	1	1	0	1	1	1	0	1	1	1	0	1	1	1	0	1	1	1	1	1	1	1	0	1	1
8178991	10	50524643	.	.	.	.	CHAT	choline acetyltransferase	Nonsynon	0.73	Special	0	1	3.43	0	0	0	0	0	0	0	0	0	0	0	0	0	0	0	0	0	0	0	0	0	0	0	0	0	0	0	0	0	0	0	0	0	0	0
11553946	11	105453811	.	.	.	.	AASDHPPT	aminoadipate-semialdehyde dehydrogenase-phosphopantetheinyl transferase	Nonsynon	0.73	The Alcohol System	0	1	3.43	0	0	0	0	0	0	0	0	0	0	0	0	0	0	0	0	0	0	0	0	0	0	0	0	0	0	0	0	0	0	0	0	0	0	0
11575376	7	50539251	0	0	0	0	DDC	dopa decarboxylase (aromatic L-amino acid decarboxylase)	Nonsynon	0.73	Dopamine Synthesis	0	1	3.43	1	0	0	0	0	0	0	0	1	0	0	0	0	0	0	0	0	0	0	0	0	0	0	0	0	0	0	0	0	0	0	0	0	1	1
11575377	7	50539249	0	0	0	0	DDC	dopa decarboxylase (aromatic L-amino acid decarboxylase)	Nonsynon	0.73	Dopamine Synthesis	0	1	3.43	1	1	0	0	0	0	0	0	1	0	0	0	0	0	0	0	0	0	0	0	0	0	0	0	0	0	0	0	0	0	0	0	0	1	1
11575542	7	50498481	0.042	0	0	0.144	DDC	dopa decarboxylase (aromatic L-amino acid decarboxylase)	Nonsynon	0.73	Dopamine Synthesis	0	1	3.43	1	1	0	0	1	1	1	1	1	0	0	0	1	0	0	0	1	1	1	1	1	1	1	1	1	1	1	1	1	1	1	1	1	1	1
28365216	12	38923625	0	0	0	0	LRRK2	leucine-rich repeat kinase 2	Nonsynon	0.73	Special	0	1	3.43	0	0	0	0	0	0	0	0	0	0	0	0	0	0	0	0	0	0	0	0	0	0	0	0	0	0	0	0	0	0	0	0	0	0	0
28381218	1	145128438	.	.	.	.	FMO5	flavin containing monooxygenase 5	Nonsynon	0.73	The Nicotine Metabolism System	0	1	3.43	0	0	0	0	0	0	0	0	0	0	0	0	0	0	0	0	0	0	0	0	0	0	0	0	0	0	0	0	0	0	0	0	0	0	0
28929768	17	4746342	.	.	.	.	CHRNE	cholinergic receptor, nicotinic, epsilon	Nonsynon	0.73	The Nicotine System	0	1	3.43	0	0	0	0	0	0	0	0	0	0	0	0	0	0	0	0	0	0	0	0	0	0	0	0	0	0	0	0	0	0	0	0	0	0	0
34008213	17	46038433	.	.	.	.	CACNA1G	calcium channel, voltage-dependent, T type, alpha 1G subunit	Nonsynon	0.73	Special	0	1	3.43	0	0	0	0	0	0	0	0	0	0	0	0	0	0	0	0	0	0	0	0	0	0	0	0	0	0	0	0	0	0	0	0	0	0	0
34101317	2	24902495	.	.	.	.	ADCY3	adenylate cyclase 3	Nonsynon	0.73	Special	0	1	3.43	0	0	0	0	0	0	0	0	0	0	0	0	0	0	0	0	0	0	0	0	0	0	0	0	0	0	0	0	0	0	0	0	0	0	0
34472303	5	176790510	.	.	.	.	GRK6	G protein-coupled receptor kinase 6	Nonsynon	0.73	The Adrenergic System	0	1	3.43	0	0	0	0	0	0	0	0	0	0	0	0	0	0	0	0	0	0	0	0	0	0	0	0	0	0	0	0	0	0	0	0	0	0	0
34617528	17	3747871	.	.	.	.	P2RX1	purinergic receptor P2X, ligand-gated ion channel, 1	Nonsynon	0.73	Special	0	1	3.43	0	0	0	0	0	0	0	0	0	0	0	0	0	0	0	0	0	0	0	0	0	0	0	0	0	0	0	0	0	0	0	0	0	0	0
34805604	12	38979194	.	.	.	.	LRRK2	leucine-rich repeat kinase 2	Nonsynon	0.73	Special	0	1	3.43	0	0	0	0	0	0	0	0	0	0	0	0	0	0	0	0	0	0	0	0	0	0	0	0	0	0	0	0	0	0	0	0	0	0	0
35399855	19	18910549	.	.	.	.	HOMER3	homer homolog 3 (Drosophila)	Synon	0.73	Special	0	4	3.43	0	0	0	0	0	0	0	0	0	0	0	0	0	0	0	0	0	0	0	0	0	0	0	0	0	0	0	0	0	0	0	0	0	0	0
35482889	11	118474353	.	.	.	.	DPAGT1	dolichyl-phosphate (UDP-N-acetylglucosamine) N-acetylglucosaminephosphotransferase 1 (GlcNAc-1-P transferase)	Nonsynon	0.73	Special	0	1	3.43	0	0	0	0	0	0	0	0	0	0	0	0	0	0	0	0	0	0	0	0	0	0	0	0	0	0	0	0	0	0	0	0	0	0	0
35844228	10	135192011	.	.	.	.	CYP2E1	cytochrome P450, family 2, subfamily E, polypeptide 1	Nonsynon	0.73	Goldman Gene	0	1	3.43	0	0	0	0	0	0	0	0	0	0	0	0	0	0	0	0	0	0	0	0	0	0	0	0	0	0	0	0	0	0	0	0	0	0	0
36016791	12	38931397	.	.	.	.	LRRK2	leucine-rich repeat kinase 2	Nonsynon	0.73	Special	0	1	3.43	0	0	0	0	0	0	0	0	0	0	0	0	0	0	0	0	0	0	0	0	0	0	0	0	0	0	0	0	0	0	0	0	0	0	0
45570944	7	45666225	.	.	.	.	ADCY1	adenylate cyclase 1 (brain)	Nonsynon	0.73	Special	0	1	3.43	0	0	0	0	0	0	0	0	0	0	0	0	0	0	0	0	0	0	0	0	0	0	0	0	0	0	0	0	0	0	0	0	0	0	0
284797	4	100568158	0	0	0	0	ADH7	alcohol dehydrogenase 7 (class IV), mu or sigma polypeptide	Nonsynon	0.93	The Alcohol System	.	.	3.43	0	0	0	0	0	0	1	0	1	0	0	0	0	0	0	0	0	0	0	0	0	0	0	0	0	1	1	1	1	0	0	0	0	1	1
607159	5	88054196	0	0	0	0	MEF2C	myocyte enhancer factor 2C	Nonsynon	0.93		1	14	3.43	0	0	0	0	0	0	0	0	1	0	0	0	0	0	0	0	0	0	0	0	0	0	0	0	0	0	0	0	0	0	0	0	0	1	1
1371869	1	22984002	.	.	.	.	EPHB2	EPH receptor B2	Synon	0.93	Special	0	3	3.43	0	0	0	0	0	0	0	0	0	0	0	0	0	0	0	0	0	0	0	0	0	0	0	0	0	0	0	0	0	0	0	0	0	0	0
2073852	16	71550168	.	.	.	.	ATBF1	zinc finger homeobox 3	Nonsynon	0.93		1	9	3.43	0	0	0	0	0	0	0	0	0	0	0	0	0	0	0	0	0	0	0	0	0	0	0	0	0	0	0	0	0	0	0	0	0	0	0
2229000	12	4891416	0	0	0	0	KCNA1	potassium voltage-gated channel, shaker-related subfamily, member 1 (episodic ataxia with myokymia)	Nonsynon	0.93	Special	.	.	3.43	0	0	0	0	0	0	0	0	1	0	0	0	0	0	0	0	0	0	0	0	0	0	0	0	0	0	0	0	0	0	0	0	0	1	1
7193297	16	71551332	0.379	0.267	0.193	0.186	ATBF1	zinc finger homeobox 3	Nonsynon	0.93		1	9	3.43	0	0	0	0	0	0	0	0	1	0	0	0	0	0	0	0	0	0	0	0	0	0	0	0	0	0	0	0	0	0	0	0	0	1	1
12922324	16	71551520	.	.	.	.	ATBF1	zinc finger homeobox 3	Nonsynon	0.93		1	9	3.43	0	0	0	0	0	0	0	0	0	0	0	0	0	0	0	0	0	0	0	0	0	0	0	0	0	0	0	0	0	0	0	0	0	0	0
12922687	16	71551517	.	.	.	.	ATBF1	zinc finger homeobox 3	Nonsynon	0.93		1	9	3.43	0	0	0	0	0	0	0	0	0	0	0	0	0	0	0	0	0	0	0	0	0	0	0	0	0	0	0	0	0	0	0	0	0	0	0
16971436	16	71550264	0	0.091	0.073	0.147	ATBF1	zinc finger homeobox 3	Nonsynon	0.93		1	9	3.43	0	0	0	0	0	0	0	0	0	0	0	0	0	0	0	0	0	0	0	0	0	0	0	0	0	0	0	0	0	0	0	0	0	0	0
17856763	5	88054191	0	0	0	0	MEF2C	myocyte enhancer factor 2C	Nonsynon	0.93		1	14	3.43	0	0	0	0	0	0	0	0	0	0	0	0	0	0	0	0	0	0	0	0	0	0	0	0	0	0	0	0	0	0	0	0	0	0	0
28933381	12	4891529	.	.	.	.	KCNA1	potassium voltage-gated channel, shaker-related subfamily, member 1 (episodic ataxia with myokymia)	Nonsynon	0.93	Special	.	.	3.43	0	0	0	0	0	0	0	0	0	0	0	0	0	0	0	0	0	0	0	0	0	0	0	0	0	0	0	0	0	0	0	0	0	0	0
28933382	12	4891536	.	.	.	.	KCNA1	potassium voltage-gated channel, shaker-related subfamily, member 1 (episodic ataxia with myokymia)	Nonsynon	0.93	Special	.	.	3.43	0	0	0	0	0	0	0	0	0	0	0	0	0	0	0	0	0	0	0	0	0	0	0	0	0	0	0	0	0	0	0	0	0	0	0
28933383	12	4891482	.	.	.	.	KCNA1	potassium voltage-gated channel, shaker-related subfamily, member 1 (episodic ataxia with myokymia)	Nonsynon	0.93	Special	.	.	3.43	0	0	0	0	0	0	0	0	0	0	0	0	0	0	0	0	0	0	0	0	0	0	0	0	0	0	0	0	0	0	0	0	0	0	0
34511490	16	71551170	.	.	.	.	ATBF1	zinc finger homeobox 3	Nonsynon	0.93		1	9	3.43	0	0	0	0	0	0	0	0	0	0	0	0	0	0	0	0	0	0	0	0	0	0	0	0	0	0	0	0	0	0	0	0	0	0	0
34733098	1	31859221	.	.	.	.	HCRTR1	hypocretin (orexin) receptor 1	Nonsynon	0.93	Special	.	.	3.43	0	0	0	0	0	0	0	0	0	0	0	0	0	0	0	0	0	0	0	0	0	0	0	0	0	0	0	0	0	0	0	0	0	0	0
34753508	1	33572378	.	.	.	.	PHC2	polyhomeotic homolog 2 (Drosophila)	Nonsynon	0.93		1	6	3.43	0	0	0	0	0	0	0	0	0	0	0	0	0	0	0	0	0	0	0	0	0	0	0	0	0	0	0	0	0	0	0	0	0	0	0
35466869	16	71550616	.	.	.	.	ATBF1	zinc finger homeobox 3	Nonsynon	0.93		1	9	3.43	0	0	0	0	0	0	0	0	0	0	0	0	0	0	0	0	0	0	0	0	0	0	0	0	0	0	0	0	0	0	0	0	0	0	0
750051	15	40148242	0.125	0	0	0.042	PLA2G4D	phospholipase A2, group IVD (cytosolic)	Nonsynon	0.72	Special	0	1	3.43	0	0	0	0	0	0	0	0	0	1	0	0	0	1	0	0	0	1	0	0	0	1	0	0	0	1	0	0	0	1	0	0	0	1	0
750052	15	40148314	0.125	0	0	0.042	PLA2G4D	phospholipase A2, group IVD (cytosolic)	Nonsynon	0.72	Special	0	1	3.43	0	0	0	0	1	1	1	1	1	1	0	0	0	1	0	0	0	1	1	1	1	1	1	1	1	1	1	1	1	1	1	1	1	1	1
1801582	6	161727845	0.167	0.056	0.067	0.192	PARK2	Parkinson disease (autosomal recessive, juvenile) 2, parkin	Nonsynon	0.72	Special	0	1	3.43	0	0	0	1	0	0	0	0	0	0	0	0	0	1	1	1	1	1	0	0	0	1	1	1	1	1	1	1	1	1	1	1	1	1	1
2228246	20	39225477	0.167	0	0	0.093	PLCG1	phospholipase C, gamma 1	Nonsynon	0.72	Special	0	1	3.43	0	0	0	0	1	1	1	1	1	1	0	0	1	1	0	0	1	1	1	1	1	1	1	1	1	1	1	1	1	1	1	1	1	1	1
2240154	19	954172	0.183	0.467	0.411	0	GRIN3B	glutamate receptor, ionotropic, N-methyl-D-aspartate 3B	Nonsynon	0.72	The Glutamatergic System	0	1	3.43	0	0	0	0	1	1	1	1	1	0	0	0	0	0	1	0	0	1	1	1	1	1	1	1	1	1	1	1	1	1	1	1	1	1	1
2276038	11	56894000	0.392	0.333	0.398	0.05	P2RX3	purinergic receptor P2X, ligand-gated ion channel, 3	Nonsynon	0.72	Special	0	1	3.43	0	0	0	0	0	0	0	0	1	0	0	0	0	1	0	1	1	1	0	1	1	1	0	1	1	1	0	1	1	1	0	1	1	1	1
3027180	17	7993338	.	.	.	.	PER1	period homolog 1 (Drosophila)	Nonsynon	0.72	Special	0	1	3.43	0	0	0	0	0	0	0	0	0	0	0	0	0	0	0	0	0	0	0	0	0	0	0	0	0	0	0	0	0	0	0	0	0	0	0
11542229	7	44247860	.	.	.	.	CAMK2B	calcium/calmodulin-dependent protein kinase (CaM kinase) II beta	Nonsynon	0.72	Special	0	1	3.43	0	0	0	0	0	0	0	0	0	0	0	0	0	0	0	0	0	0	0	0	0	0	0	0	0	0	0	0	0	0	0	0	0	0	0
17273542	9	13214491	0.009	0	0	0	MPDZ	multiple PDZ domain protein	Nonsynon	0.72	Goldman Gene	0	1	3.43	0	1	0	0	0	0	0	0	1	0	0	0	0	0	0	0	0	0	0	0	0	0	0	0	0	0	0	0	0	0	0	0	0	1	1
34438956	17	4567729	.	.	.	.	ARRB2	arrestin, beta 2	Nonsynon	0.72	Special	0	1	3.43	0	0	0	0	0	0	0	0	0	0	0	0	0	0	0	0	0	0	0	0	0	0	0	0	0	0	0	0	0	0	0	0	0	0	0
34594498	12	38933053	.	.	.	.	LRRK2	leucine-rich repeat kinase 2	Nonsynon	0.72	Special	0	1	3.43	0	0	0	0	0	0	0	0	0	0	0	0	0	0	0	0	0	0	0	0	0	0	0	0	0	0	0	0	0	0	0	0	0	0	0
34776397	9	13173464	.	.	.	.	MPDZ	multiple PDZ domain protein	Nonsynon	0.72	Goldman Gene	0	1	3.43	0	0	0	0	0	0	0	0	0	0	0	0	0	0	0	0	0	0	0	0	0	0	0	0	0	0	0	0	0	0	0	0	0	0	0
35530161	19	954212	.	.	.	.	GRIN3B	glutamate receptor, ionotropic, N-methyl-D-aspartate 3B	Nonsynon	0.72	The Glutamatergic System	0	1	3.43	0	0	0	0	0	0	0	0	0	0	0	0	0	0	0	0	0	0	0	0	0	0	0	0	0	0	0	0	0	0	0	0	0	0	0
35592366	19	954221	.	.	.	.	GRIN3B	glutamate receptor, ionotropic, N-methyl-D-aspartate 3B	Nonsynon	0.72	The Glutamatergic System	0	1	3.43	0	0	0	0	0	0	0	0	0	0	0	0	0	0	0	0	0	0	0	0	0	0	0	0	0	0	0	0	0	0	0	0	0	0	0
1804309	8	99124103	.	.	.	.	RPL30	ribosomal protein L30	Nonsynon	0.92		1	6	3.42	0	0	0	0	0	0	0	0	0	0	0	0	0	0	0	0	0	0	0	0	0	0	0	0	0	0	0	0	0	0	0	0	0	0	0
1804314	8	99124123	.	.	.	.	RPL30	ribosomal protein L30	Nonsynon	0.92		1	6	3.42	0	0	0	0	0	0	0	0	0	0	0	0	0	0	0	0	0	0	0	0	0	0	0	0	0	0	0	0	0	0	0	0	0	0	0
2213978	16	71542096	0.018	0	0	0	ATBF1	zinc finger homeobox 3	Nonsynon	0.92		1	9	3.42	0	0	0	0	0	0	0	0	1	0	0	0	0	0	0	0	0	0	0	0	0	0	0	0	0	0	0	0	0	0	0	0	0	1	1
2298771	2	166601034	0.358	0.122	0.136	0.125	SCN1A	sodium channel, voltage-gated, type I, alpha subunit	Nonsynon	0.92	Special	.	.	3.42	0	0	0	0	0	0	0	0	0	1	1	1	1	1	1	1	1	1	1	1	1	1	1	1	1	1	1	1	1	1	1	1	1	1	1
3887192	1	23561829	0	0	0	0	ZNF436	zinc finger protein 436	Nonsynon	0.92		1	12	3.42	0	0	0	0	0	0	0	0	1	0	0	0	0	0	0	0	0	0	0	0	0	0	0	0	0	0	0	0	0	0	0	0	0	1	1
7170589	15	54173869	0	0	0	0	RFXDC2	regulatory factor X domain containing 2	Nonsynon	0.92		1	9	3.42	0	0	0	0	0	0	0	0	1	0	0	0	0	0	0	0	0	0	0	0	0	0	0	0	0	0	0	0	0	0	0	0	0	1	1
9951523	18	48121222	0.033	0	0	0	DCC	deleted in colorectal carcinoma	Nonsynon	0.92		1	8	3.42	0	0	0	0	0	0	0	0	0	0	0	0	0	0	0	0	0	0	0	0	0	0	0	0	0	0	0	0	0	0	0	0	0	0	0
16864314	1	169517820	0	0	0.011	0.15	FMO1	flavin containing monooxygenase 1	Nonsynon	0.92	The Nicotine Metabolism System	.	.	3.42	1	0	1	1	0	0	0	0	1	1	1	1	1	1	1	1	1	0	0	0	0	0	0	0	1	0	0	0	1	0	0	0	1	1	1
17791076	20	49059778	.	.	.	.	KCNG1	potassium voltage-gated channel, subfamily G, member 1	Nonsynon	0.92	Special	.	.	3.42	0	0	0	0	0	0	0	0	0	0	0	0	0	0	0	0	0	0	0	0	0	0	0	0	0	0	0	0	0	0	0	0	0	0	0
17851863	9	127114700	.	.	.	.	GAPVD1	GTPase activating protein and VPS9 domains 1	Nonsynon	0.92		1	12	3.42	0	0	0	0	0	0	0	0	0	0	0	0	0	0	0	0	0	0	0	0	0	0	0	0	0	0	0	0	0	0	0	0	0	0	0
17854404	20	49059987	.	.	.	.	KCNG1	potassium voltage-gated channel, subfamily G, member 1	Nonsynon	0.92	Special	.	.	3.42	0	0	0	0	0	0	0	0	0	0	0	0	0	0	0	0	0	0	0	0	0	0	0	0	0	0	0	0	0	0	0	0	0	0	0
28360418	1	169517821	.	.	.	.	FMO1	flavin containing monooxygenase 1	Nonsynon	0.92	The Nicotine Metabolism System	.	.	3.42	1	0	0	0	0	0	0	0	0	0	0	0	0	0	0	0	0	0	0	0	0	0	0	0	0	0	0	0	0	0	0	0	0	0	0
28360419	1	169517877	.	.	.	.	FMO1	flavin containing monooxygenase 1	Nonsynon	0.92	The Nicotine Metabolism System	.	.	3.42	1	0	0	0	0	0	0	0	0	0	0	0	0	0	0	0	0	0	0	0	0	0	0	0	0	0	0	0	0	0	0	0	0	0	0
28360420	1	169517892	.	.	.	.	FMO1	flavin containing monooxygenase 1	Nonsynon	0.92	The Nicotine Metabolism System	.	.	3.42	1	0	0	0	0	0	0	0	0	0	0	0	0	0	0	0	0	0	0	0	0	0	0	0	0	0	0	0	0	0	0	0	0	0	0
28360421	1	169518031	.	.	.	.	FMO1	flavin containing monooxygenase 1	Nonsynon	0.92	The Nicotine Metabolism System	.	.	3.42	1	0	0	0	0	0	0	0	0	0	0	0	0	0	0	0	0	0	0	0	0	0	0	0	0	0	0	0	0	0	0	0	0	0	0
28937316	3	38567936	.	.	.	.	SCN5A	sodium channel, voltage-gated, type V, alpha subunit	Nonsynon	0.92	Special	.	.	3.42	0	0	0	0	0	0	0	0	0	0	0	0	0	0	0	0	0	0	0	0	0	0	0	0	0	0	0	0	0	0	0	0	0	0	0
33984059	15	54173160	.	.	.	.	RFXDC2	regulatory factor X domain containing 2	Nonsynon	0.92		1	9	3.42	0	0	0	0	0	0	0	0	0	0	0	0	0	0	0	0	0	0	0	0	0	0	0	0	0	0	0	0	0	0	0	0	0	0	0
35725027	20	49060019	.	.	.	.	KCNG1	potassium voltage-gated channel, subfamily G, member 1	Nonsynon	0.92	Special	.	.	3.42	0	0	0	0	0	0	0	0	0	0	0	0	0	0	0	0	0	0	0	0	0	0	0	0	0	0	0	0	0	0	0	0	0	0	0
41311117	3	38566857	.	.	.	.	SCN5A	sodium channel, voltage-gated, type V, alpha subunit	Nonsynon	0.92	Special	.	.	3.42	0	0	0	0	0	0	0	0	0	0	0	0	0	0	0	0	0	0	0	0	0	0	0	0	0	0	0	0	0	0	0	0	0	0	0
41315493	3	38567016	.	.	.	.	SCN5A	sodium channel, voltage-gated, type V, alpha subunit	Nonsynon	0.92	Special	.	.	3.42	0	0	0	0	0	0	0	0	0	0	0	0	0	0	0	0	0	0	0	0	0	0	0	0	0	0	0	0	0	0	0	0	0	0	0
45465995	3	38567178	.	.	.	.	SCN5A	sodium channel, voltage-gated, type V, alpha subunit	Nonsynon	0.92	Special	.	.	3.42	0	0	0	0	0	0	0	0	0	0	0	0	0	0	0	0	0	0	0	0	0	0	0	0	0	0	0	0	0	0	0	0	0	0	0
45489199	3	38566851	.	.	.	.	SCN5A	sodium channel, voltage-gated, type V, alpha subunit	Nonsynon	0.92	Special	.	.	3.42	0	0	0	0	0	0	0	0	0	0	0	0	0	0	0	0	0	0	0	0	0	0	0	0	0	0	0	0	0	0	0	0	0	0	0
45563942	3	38567360	.	.	.	.	SCN5A	sodium channel, voltage-gated, type V, alpha subunit	Nonsynon	0.92	Special	.	.	3.42	0	0	0	0	0	0	0	0	0	0	0	0	0	0	0	0	0	0	0	0	0	0	0	0	0	0	0	0	0	0	0	0	0	0	0
45606037	3	38567619	.	.	.	.	SCN5A	sodium channel, voltage-gated, type V, alpha subunit	Nonsynon	0.92	Special	.	.	3.42	0	0	0	0	0	0	0	0	0	0	0	0	0	0	0	0	0	0	0	0	0	0	0	0	0	0	0	0	0	0	0	0	0	0	0
5577	4	164467193	.	.	.	.	NPY1R	neuropeptide Y receptor Y1	mRNA-UTR	0.82	Goldman Gene	0	5	3.42	0	0	0	0	0	0	0	0	0	0	0	0	0	0	0	0	0	0	0	0	0	0	0	0	0	0	0	0	0	0	0	0	0	0	0
1044802	22	24404843	.	.	.	.	ADRBK2	adrenergic, beta, receptor kinase 2	Synon	0.71	The Adrenergic System	0	4	3.42	0	0	0	0	0	0	0	0	0	0	0	0	0	0	0	0	0	0	0	0	0	0	0	0	0	0	0	0	0	0	0	0	0	0	0
1050281	17	3539579	.	.	.	.	P2RX5	purinergic receptor P2X, ligand-gated ion channel, 5	Nonsynon	0.71	Special	0	1	3.42	0	0	0	0	0	0	0	0	0	0	0	0	0	0	0	0	0	0	0	0	0	0	0	0	0	0	0	0	0	0	0	0	0	0	0
1140499	17	3539671	.	.	.	.	P2RX5	purinergic receptor P2X, ligand-gated ion channel, 5	Nonsynon	0.71	Special	0	1	3.42	0	0	0	0	0	0	0	0	0	0	0	0	0	0	0	0	0	0	0	0	0	0	0	0	0	0	0	0	0	0	0	0	0	0	0
1801474	6	162542187	0.017	0.456	0.375	0.075	PARK2	Parkinson disease (autosomal recessive, juvenile) 2, parkin	Nonsynon	0.71	Special	0	1	3.42	0	0	0	0	0	0	0	0	1	0	0	0	0	0	1	0	1	0	0	0	0	0	0	1	0	0	0	1	0	0	1	1	1	1	1
3215407	17	3541030	.	.	.	.	P2RX5	purinergic receptor P2X, ligand-gated ion channel, 5	Nonsynon	0.71	Special	0	1	3.42	0	0	0	0	0	0	0	0	0	0	0	0	0	0	0	0	0	0	0	0	0	0	0	0	0	0	0	0	0	0	0	0	0	0	0
3810950	10	50494625	0.233	0.1	0.244	0	CHAT	choline acetyltransferase	Nonsynon	0.71	Special	0	1	3.42	0	0	1	1	1	1	1	1	1	1	1	1	1	1	1	1	1	1	1	1	1	1	1	1	1	1	1	1	1	1	1	1	1	1	1
5818907	17	3541026	.	.	.	.	P2RX5	purinergic receptor P2X, ligand-gated ion channel, 5	Nonsynon	0.71	Special	0	1	3.42	0	0	0	0	0	0	0	0	0	0	0	0	0	0	0	0	0	0	0	0	0	0	0	0	0	0	0	0	0	0	0	0	0	0	0
34090008	12	38939672	.	.	.	.	LRRK2	leucine-rich repeat kinase 2	Nonsynon	0.71	Special	0	1	3.42	0	0	0	0	0	0	0	0	0	0	0	0	0	0	0	0	0	0	0	0	0	0	0	0	0	0	0	0	0	0	0	0	0	0	0
41265286	9	13148062	.	.	.	.	MPDZ	multiple PDZ domain protein	Nonsynon	0.71	Goldman Gene	0	1	3.42	0	0	0	0	0	0	0	0	0	0	0	0	0	0	0	0	0	0	0	0	0	0	0	0	0	0	0	0	0	0	0	0	0	0	0
1054267	20	49054248	0	0	0	0	KCNG1	potassium voltage-gated channel, subfamily G, member 1	Nonsynon	0.91	Special	.	.	3.41	0	0	0	0	0	0	0	0	0	0	0	0	0	0	0	0	0	0	0	0	0	0	0	0	0	0	0	0	0	0	0	0	0	0	0
1056463	12	5023987	.	.	.	.	KCNA5	potassium voltage-gated channel, shaker-related subfamily, member 5	Nonsynon	0.91	Special	.	.	3.41	0	0	0	0	0	0	0	0	0	0	0	0	0	0	0	0	0	0	0	0	0	0	0	0	0	0	0	0	0	0	0	0	0	0	0
1056464	12	5024256	0	0.011	0.023	0.009	KCNA5	potassium voltage-gated channel, shaker-related subfamily, member 5	Nonsynon	0.91	Special	.	.	3.41	0	0	0	0	0	0	0	0	1	0	0	0	0	0	0	0	0	0	0	0	0	0	0	0	0	0	0	0	0	0	0	0	0	1	1
1139554	3	11051361	.	.	.	.	SLC6A1	solute carrier family 6 (neurotransmitter transporter, GABA), member 1	Nonsynon	0.91	The GABA System	.	.	3.41	0	0	0	0	0	0	0	0	0	0	0	0	0	0	0	0	0	0	0	0	0	0	0	0	0	0	0	0	0	0	0	0	0	0	0
2149989	9	127717936	0	0	0	0	PBX3	pre-B-cell leukemia homeobox 3	Nonsynon	0.91		1	7	3.41	0	0	0	0	0	0	0	0	1	0	0	0	0	0	0	0	0	0	0	0	0	0	0	0	0	0	0	0	0	0	0	0	0	1	1
3197074	12	5024214	.	.	.	.	KCNA5	potassium voltage-gated channel, shaker-related subfamily, member 5	Nonsynon	0.91	Special	.	.	3.41	0	0	0	0	0	0	0	0	0	0	0	0	0	0	0	0	0	0	0	0	0	0	0	0	0	0	0	0	0	0	0	0	0	0	0
4562591	1	22053758	0	0	0	0	HSPG2	heparan sulfate proteoglycan 2	Nonsynon	0.91		1	6	3.41	0	0	0	0	0	0	0	0	0	0	0	0	0	0	0	0	0	0	0	0	0	0	0	0	0	0	0	0	0	0	0	0	0	0	0
7224723	17	16397339	0.05	0	0	0.492	ZNF287	zinc finger protein 287	Nonsynon	0.91		1	6	3.41	0	0	0	0	1	1	1	1	1	1	0	0	1	1	0	0	1	1	1	1	1	1	1	1	1	1	1	1	1	1	1	1	1	1	1
11554012	20	49054308	.	.	.	.	KCNG1	potassium voltage-gated channel, subfamily G, member 1	Nonsynon	0.91	Special	.	.	3.41	0	0	0	0	0	0	0	0	0	0	0	0	0	0	0	0	0	0	0	0	0	0	0	0	0	0	0	0	0	0	0	0	0	0	0
17791052	20	49054613	.	.	.	.	KCNG1	potassium voltage-gated channel, subfamily G, member 1	Nonsynon	0.91	Special	.	.	3.41	0	0	0	0	0	0	0	0	0	0	0	0	0	0	0	0	0	0	0	0	0	0	0	0	0	0	0	0	0	0	0	0	0	0	0
17854403	20	49054369	.	.	.	.	KCNG1	potassium voltage-gated channel, subfamily G, member 1	Nonsynon	0.91	Special	.	.	3.41	0	0	0	0	0	0	0	0	0	0	0	0	0	0	0	0	0	0	0	0	0	0	0	0	0	0	0	0	0	0	0	0	0	0	0
17855574	3	11051251	0	0	0	0	SLC6A1	solute carrier family 6 (neurotransmitter transporter, GABA), member 1	Nonsynon	0.91	The GABA System	.	.	3.41	0	0	0	0	0	0	0	0	0	0	0	0	0	0	0	0	0	0	0	0	0	0	0	0	0	0	0	0	0	0	0	0	0	0	0
17857320	20	49054186	.	.	.	.	KCNG1	potassium voltage-gated channel, subfamily G, member 1	Nonsynon	0.91	Special	.	.	3.41	0	0	0	0	0	0	0	0	0	0	0	0	0	0	0	0	0	0	0	0	0	0	0	0	0	0	0	0	0	0	0	0	0	0	0
34454438	20	47532139	.	.	.	.	KCNB1	potassium voltage-gated channel, Shab-related subfamily, member 1	Nonsynon	0.91	Special	.	.	3.41	0	0	0	0	0	0	0	0	0	0	0	0	0	0	0	0	0	0	0	0	0	0	0	0	0	0	0	0	0	0	0	0	0	0	0
34499840	11	62753607	.	.	.	.	LOC387601	solute carrier family 22, member 25	Nonsynon	0.91		1	6	3.41	0	0	0	0	0	0	0	0	0	0	0	0	0	0	0	0	0	0	0	0	0	0	0	0	0	0	0	0	0	0	0	0	0	0	0
35130466	12	5024675	.	.	.	.	KCNA5	potassium voltage-gated channel, shaker-related subfamily, member 5	Nonsynon	0.91	Special	.	.	3.41	0	0	0	0	0	0	0	0	0	0	0	0	0	0	0	0	0	0	0	0	0	0	0	0	0	0	0	0	0	0	0	0	0	0	0
35154586	1	111017439	.	.	.	.	KCNA3	potassium voltage-gated channel, shaker-related subfamily, member 3	Nonsynon	0.91	Special	.	.	3.41	0	0	0	0	0	0	0	0	0	0	0	0	0	0	0	0	0	0	0	0	0	0	0	0	0	0	0	0	0	0	0	0	0	0	0
35722529	11	62753436	.	.	.	.	LOC387601	solute carrier family 22, member 25	Nonsynon	0.91		1	6	3.41	0	0	0	0	0	0	0	0	0	0	0	0	0	0	0	0	0	0	0	0	0	0	0	0	0	0	0	0	0	0	0	0	0	0	0
35853292	12	5024207	.	.	.	.	KCNA5	potassium voltage-gated channel, shaker-related subfamily, member 5	Nonsynon	0.91	Special	.	.	3.41	0	0	0	0	0	0	0	0	0	0	0	0	0	0	0	0	0	0	0	0	0	0	0	0	0	0	0	0	0	0	0	0	0	0	0
41276730	12	5024127	.	.	.	.	KCNA5	potassium voltage-gated channel, shaker-related subfamily, member 5	Nonsynon	0.91	Special	.	.	3.41	0	0	0	0	0	0	0	0	0	0	0	0	0	0	0	0	0	0	0	0	0	0	0	0	0	0	0	0	0	0	0	0	0	0	0
41281374	1	111017392	.	.	.	.	KCNA3	potassium voltage-gated channel, shaker-related subfamily, member 3	Nonsynon	0.91	Special	.	.	3.41	0	0	0	0	0	0	0	0	0	0	0	0	0	0	0	0	0	0	0	0	0	0	0	0	0	0	0	0	0	0	0	0	0	0	0
45438698	12	5025307	.	.	.	.	KCNA5	potassium voltage-gated channel, shaker-related subfamily, member 5	Nonsynon	0.91	Special	.	.	3.41	0	0	0	0	0	0	0	0	0	0	0	0	0	0	0	0	0	0	0	0	0	0	0	0	0	0	0	0	0	0	0	0	0	0	0
45443203	12	5024493	.	.	.	.	KCNA5	potassium voltage-gated channel, shaker-related subfamily, member 5	Nonsynon	0.91	Special	.	.	3.41	0	0	0	0	0	0	0	0	0	0	0	0	0	0	0	0	0	0	0	0	0	0	0	0	0	0	0	0	0	0	0	0	0	0	0
45477792	12	5025169	.	.	.	.	KCNA5	potassium voltage-gated channel, shaker-related subfamily, member 5	Nonsynon	0.91	Special	.	.	3.41	0	0	0	0	0	0	0	0	0	0	0	0	0	0	0	0	0	0	0	0	0	0	0	0	0	0	0	0	0	0	0	0	0	0	0
45519538	12	5023918	.	.	.	.	KCNA5	potassium voltage-gated channel, shaker-related subfamily, member 5	Nonsynon	0.91	Special	.	.	3.41	0	0	0	0	0	0	0	0	0	0	0	0	0	0	0	0	0	0	0	0	0	0	0	0	0	0	0	0	0	0	0	0	0	0	0
45573135	12	5024325	.	.	.	.	KCNA5	potassium voltage-gated channel, shaker-related subfamily, member 5	Nonsynon	0.91	Special	.	.	3.41	0	0	0	0	0	0	0	0	0	0	0	0	0	0	0	0	0	0	0	0	0	0	0	0	0	0	0	0	0	0	0	0	0	0	0
45583932	12	5024503	.	.	.	.	KCNA5	potassium voltage-gated channel, shaker-related subfamily, member 5	Nonsynon	0.91	Special	.	.	3.41	0	0	0	0	0	0	0	0	0	0	0	0	0	0	0	0	0	0	0	0	0	0	0	0	0	0	0	0	0	0	0	0	0	0	0
45618444	12	5024326	.	.	.	.	KCNA5	potassium voltage-gated channel, shaker-related subfamily, member 5	Nonsynon	0.91	Special	.	.	3.41	0	0	0	0	0	0	0	0	0	0	0	0	0	0	0	0	0	0	0	0	0	0	0	0	0	0	0	0	0	0	0	0	0	0	0
3730316	22	24430144	0	0	0.011	0	ADRBK2	adrenergic, beta, receptor kinase 2	Synon	0.7	The Adrenergic System	0	4	3.41	0	0	0	0	0	0	0	0	0	0	0	0	0	0	0	0	0	0	0	0	0	0	0	0	0	0	0	0	0	0	0	0	0	0	0
7308720	12	38943967	0.058	0.022	0.193	0.15	LRRK2	leucine-rich repeat kinase 2	Nonsynon	0.7	Special	0	1	3.41	0	0	0	1	0	0	0	0	0	0	0	0	0	1	1	1	1	1	0	1	0	1	0	1	0	1	0	1	0	1	0	1	0	1	0
10401245	19	960485	.	.	.	.	GRIN3B	glutamate receptor, ionotropic, N-methyl-D-aspartate 3B	Nonsynon	0.7	The Glutamatergic System	0	1	3.41	0	0	0	0	0	0	0	0	0	0	0	0	0	0	0	0	0	0	0	0	0	0	0	0	0	0	0	0	0	0	0	0	0	0	0
11558825	12	52187150	0	0	0	0	NPFF	neuropeptide FF-amide peptide precursor	Nonsynon	0.7	Special	0	1	3.41	0	0	0	0	0	0	0	0	1	0	0	0	0	0	0	0	0	0	0	0	0	0	0	0	0	0	0	0	0	0	0	0	0	1	1
34820226	1	46648682	.	.	.	.	FAAH	fatty acid amide hydrolase	Nonsynon	0.7	Special	0	1	3.41	0	0	0	0	0	0	0	0	0	0	0	0	0	0	0	0	0	0	0	0	0	0	0	0	0	0	0	0	0	0	0	0	0	0	0
35328937	12	38943875	.	.	.	.	LRRK2	leucine-rich repeat kinase 2	Nonsynon	0.7	Special	0	1	3.41	0	0	0	0	0	0	0	0	0	0	0	0	0	0	0	0	0	0	0	0	0	0	0	0	0	0	0	0	0	0	0	0	0	0	0
35822762	12	52186907	.	.	.	.	NPFF	neuropeptide FF-amide peptide precursor	Nonsynon	0.7	Special	0	1	3.41	0	0	0	0	0	0	0	0	0	0	0	0	0	0	0	0	0	0	0	0	0	0	0	0	0	0	0	0	0	0	0	0	0	0	0
2271615	3	45812890	0.192	0.078	0.182	0	SLC6A20	solute carrier family 6 (proline IMINO transporter), member 20	Nonsynon	0.9	Neurotransmitter Transporters	.	.	3.4	0	0	0	0	0	0	0	0	1	0	0	0	0	0	0	1	0	0	0	0	0	0	0	0	0	0	0	0	0	0	0	0	0	1	1
2272394	3	10942712	0.008	0.189	0.167	0	SLC6A11	solute carrier family 6 (neurotransmitter transporter, GABA), member 11	Synon	0.9	The GABA System	0	3	3.4	0	0	0	0	0	0	0	0	0	0	0	0	0	0	1	1	0	0	0	0	0	0	1	1	0	0	1	1	0	0	1	1	0	0	1
2272395	3	10942739	0.448	0.167	0.136	0.475	SLC6A11	solute carrier family 6 (neurotransmitter transporter, GABA), member 11	Synon	0.9	The GABA System	0	3	3.4	0	0	0	0	0	0	0	0	1	0	0	0	1	0	0	0	1	0	0	0	0	0	0	0	0	0	0	0	0	0	0	0	0	1	1
3205096	5	90714653	.	.	.	.	ARRDC3	arrestin domain containing 3	Nonsynon	0.9		1	8	3.4	0	0	0	0	0	0	0	0	0	0	0	0	0	0	0	0	0	0	0	0	0	0	0	0	0	0	0	0	0	0	0	0	0	0	0
6739001	2	175321723	0	0	0	0.078	CHRNA1	cholinergic receptor, nicotinic, alpha 1 (muscle)	Nonsynon	0.9	The Nicotine System	.	.	3.4	0	0	0	0	0	0	0	0	0	0	0	0	0	0	0	0	0	0	0	0	0	0	0	0	0	0	0	0	0	0	0	0	0	0	0
11542607	3	130372080	.	.	.	.	ZNF9	CCHC-type zinc finger, nucleic acid binding protein	Nonsynon	0.9		1	6	3.4	0	0	0	0	0	0	0	0	0	0	0	0	0	0	0	0	0	0	0	0	0	0	0	0	0	0	0	0	0	0	0	0	0	0	0
11542610	3	130372011	.	.	.	.	ZNF9	CCHC-type zinc finger, nucleic acid binding protein	Nonsynon	0.9		1	6	3.4	0	0	0	0	0	0	0	0	0	0	0	0	0	0	0	0	0	0	0	0	0	0	0	0	0	0	0	0	0	0	0	0	0	0	0
11552546	2	219533057	.	.	.	.	CDK5R2	cyclin-dependent kinase 5, regulatory subunit 2 (p39)	Nonsynon	0.9		1	6	3.4	0	0	0	0	0	0	0	0	0	0	0	0	0	0	0	0	0	0	0	0	0	0	0	0	0	0	0	0	0	0	0	0	0	0	0
12273892	11	64237506	.	.	.	.	NRXN2	neurexin 2	Nonsynon	0.9		1	8	3.4	0	0	0	0	0	0	0	0	0	0	0	0	0	0	0	0	0	0	0	0	0	0	0	0	0	0	0	0	0	0	0	0	0	0	0
13423837	2	32493712	0	0	0	0	BIRC6	baculoviral IAP repeat-containing 6 (apollon)	Nonsynon	0.9		1	9	3.4	0	0	0	0	0	0	0	0	1	0	0	0	0	0	0	0	0	0	0	0	0	0	0	0	0	0	0	0	0	0	0	0	0	1	1
34019980	2	32493914	.	.	.	.	BIRC6	baculoviral IAP repeat-containing 6 (apollon)	Nonsynon	0.9		1	9	3.4	0	0	0	0	0	0	0	0	0	0	0	0	0	0	0	0	0	0	0	0	0	0	0	0	0	0	0	0	0	0	0	0	0	0	0
34996177	2	32494544	.	.	.	.	BIRC6	baculoviral IAP repeat-containing 6 (apollon)	Nonsynon	0.9		1	9	3.4	0	0	0	0	0	0	0	0	0	0	0	0	0	0	0	0	0	0	0	0	0	0	0	0	0	0	0	0	0	0	0	0	0	0	0
35229514	4	100276827	.	.	.	.	ADH4	alcohol dehydrogenase 4 (class II), pi polypeptide	Nonsynon	0.9	The Alcohol System	.	.	3.4	0	0	0	0	0	0	0	0	0	0	0	0	0	0	0	0	0	0	0	0	0	0	0	0	0	0	0	0	0	0	0	0	0	0	0
41266007	1	22041912	.	.	.	.	HSPG2	heparan sulfate proteoglycan 2	Nonsynon	0.9		1	6	3.4	0	0	0	0	0	0	0	0	0	0	0	0	0	0	0	0	0	0	0	0	0	0	0	0	0	0	0	0	0	0	0	0	0	0	0
45475899	3	38602476	.	.	.	.	SCN5A	sodium channel, voltage-gated, type V, alpha subunit	Nonsynon	0.9	Special	.	.	3.4	0	0	0	0	0	0	0	0	0	0	0	0	0	0	0	0	0	0	0	0	0	0	0	0	0	0	0	0	0	0	0	0	0	0	0
2072193	22	29863796	0.042	0.333	0.409	0	PLA2G3	phospholipase A2, group III	Nonsynon	0.69	Special	0	1	3.4	0	0	1	1	0	0	0	0	0	1	1	1	1	1	1	1	1	0	0	1	0	0	0	1	0	0	0	1	0	0	0	1	0	0	0
3810948	10	50492382	.	.	.	.	CHAT	choline acetyltransferase	Nonsynon	0.69	Special	0	1	3.4	0	0	0	0	0	0	0	0	0	0	0	0	0	0	0	0	0	0	0	0	0	0	0	0	0	0	0	0	0	0	0	0	0	0	0
33932471	4	66191680	.	.	.	.	EPHA5	EPH receptor A5	Nonsynon	0.68	Special	0	1	3.4	0	0	0	0	0	0	0	0	0	0	0	0	0	0	0	0	0	0	0	0	0	0	0	0	0	0	0	0	0	0	0	0	0	0	0
35517528	7	50511817	.	.	.	.	DDC	dopa decarboxylase (aromatic L-amino acid decarboxylase)	Nonsynon	0.68	Dopamine Synthesis	0	1	3.4	0	0	0	0	0	0	0	0	0	0	0	0	0	0	0	0	0	0	0	0	0	0	0	0	0	0	0	0	0	0	0	0	0	0	0
41280114	17	41254547	.	.	.	.	CRHR1	corticotropin releasing hormone receptor 1	Nonsynon	0.68	Goldman Gene	0	1	3.4	0	0	0	0	0	0	0	0	0	0	0	0	0	0	0	0	0	0	0	0	0	0	0	0	0	0	0	0	0	0	0	0	0	0	0
6265	11	27636492	0.175	0.369	0.337	0	BDNF	brain-derived neurotrophic factor	Nonsynon	0.89	Special	.	.	3.4	1	1	1	1	1	1	1	1	1	1	1	1	1	1	1	1	1	1	1	1	1	1	1	1	1	1	1	1	1	1	1	1	1	1	1
563792	2	166602822	0	0	0	0	SCN1A	sodium channel, voltage-gated, type I, alpha subunit	Nonsynon	0.89	Special	.	.	3.4	0	0	0	0	0	0	0	0	1	0	0	0	0	0	0	0	0	0	0	0	0	0	0	0	0	0	0	0	0	0	0	0	0	1	1
770087	12	88268904	0.15	0.011	0.023	0.432	DUSP6	dual specificity phosphatase 6	Nonsynon	0.89	Special	.	.	3.4	0	0	0	0	1	1	1	1	1	1	0	0	0	1	0	0	0	1	1	1	1	1	1	1	1	1	1	1	1	1	1	1	1	1	1
1048218	11	27636463	0	0	0	0	BDNF	brain-derived neurotrophic factor	Nonsynon	0.89	Special	.	.	3.4	0	0	0	0	0	0	0	0	1	0	0	0	0	0	0	0	0	0	0	0	0	0	0	0	0	0	0	0	0	0	0	0	0	1	1
1048220	11	27636314	0	0	0	0	BDNF	brain-derived neurotrophic factor	Nonsynon	0.89	Special	.	.	3.4	0	1	0	0	0	0	0	0	1	0	0	0	0	0	0	0	0	0	0	0	0	0	0	0	0	0	0	0	0	0	0	0	0	1	1
1048221	11	27636308	0	0	0	0	BDNF	brain-derived neurotrophic factor	Nonsynon	0.89	Special	.	.	3.4	0	0	0	0	0	0	0	0	0	0	0	0	0	0	0	0	0	0	0	0	0	0	0	0	0	0	0	0	0	0	0	0	0	0	0
1050636	4	100216943	0	0	0	0	ADH5	alcohol dehydrogenase 5 (class III), chi polypeptide	Nonsynon	0.89	The Alcohol System	.	.	3.4	0	0	0	0	0	0	0	0	0	0	0	0	0	0	0	0	0	0	0	0	0	0	0	0	0	0	0	0	0	0	0	0	0	0	0
1050637	4	100216553	0	0	0	0	ADH5	alcohol dehydrogenase 5 (class III), chi polypeptide	Nonsynon	0.89	The Alcohol System	.	.	3.4	0	0	0	0	0	0	0	0	1	0	0	0	0	0	0	0	0	0	0	0	0	0	0	0	0	0	0	0	0	0	0	0	0	1	1
1051433	7	125960369	0	0	0	0	GRM8	glutamate receptor, metabotropic 8	Nonsynon	0.89	The Glutamatergic System	.	.	3.4	0	0	0	0	0	0	0	0	0	0	0	0	0	0	0	0	0	0	0	0	0	0	0	0	0	0	0	0	0	0	0	0	0	0	0
1801272	19	46046373	0.042	0	0.023	0	CYP2A6	cytochrome P450, family 2, subfamily A, polypeptide 6	Nonsynon	0.89	The Nicotine Metabolism System	.	.	3.4	1	0	0	0	0	0	1	0	0	0	0	0	0	0	0	0	0	0	0	0	0	0	0	0	0	1	1	1	1	0	0	0	0	0	0
2229288	16	71385805	.	.	.	.	ATBF1	zinc finger homeobox 3	Nonsynon	0.89		1	9	3.4	0	0	0	0	0	0	0	0	0	0	0	0	0	0	0	0	0	0	0	0	0	0	0	0	0	0	0	0	0	0	0	0	0	0	0
2234948	7	125961029	.	.	.	.	GRM8	glutamate receptor, metabotropic 8	Nonsynon	0.89	The Glutamatergic System	.	.	3.4	0	0	0	0	0	0	0	0	0	0	0	0	0	0	0	0	0	0	0	0	0	0	0	0	0	0	0	0	0	0	0	0	0	0	0
2545783	19	46046395	.	.	.	.	CYP2A6	cytochrome P450, family 2, subfamily A, polypeptide 6	Nonsynon	0.89	The Nicotine Metabolism System	.	.	3.4	0	0	0	0	0	0	0	0	0	0	0	0	0	0	0	0	0	0	0	0	0	0	0	0	0	0	0	0	0	0	0	0	0	0	0
2666105	2	219991797	0	0	0	0	DES	desmin	Nonsynon	0.89		1	7	3.4	0	0	0	0	0	0	0	0	0	0	0	0	0	0	0	0	0	0	0	0	0	0	0	0	0	0	0	0	0	0	0	0	0	0	0
3211369	19	46214471	.	.	.	.	CYP2B6	cytochrome P450, family 2, subfamily B, polypeptide 6	Nonsynon	0.89	The Nicotine Metabolism System	.	.	3.4	0	0	0	0	0	0	0	0	0	0	0	0	0	0	0	0	0	0	0	0	0	0	0	0	0	0	0	0	0	0	0	0	0	0	0
3211371	19	46214555	.	.	.	.	CYP2B6	cytochrome P450, family 2, subfamily B, polypeptide 6	Nonsynon	0.89	The Nicotine Metabolism System	.	.	3.4	1	0	0	0	0	0	0	0	0	0	0	0	0	0	0	0	0	0	0	0	0	0	0	0	0	0	0	0	0	0	0	0	0	0	0
3814538	9	108731497	0.45	0.5	0.409	0.133	ZNF462	zinc finger protein 462	Nonsynon	0.89		1	9	3.4	0	0	0	1	1	1	1	1	1	0	0	0	0	1	1	1	1	1	1	1	1	1	1	1	1	1	1	1	1	1	1	1	1	1	1
3814541	9	108729573	0.158	0.056	0.045	0.008	ZNF462	zinc finger protein 462	Nonsynon	0.89		1	9	3.4	0	0	0	0	1	1	1	1	1	1	1	0	0	1	1	0	0	1	1	1	1	1	1	1	1	1	1	1	1	1	1	1	1	1	1
3903257	2	219991496	.	.	.	.	DES	desmin	Nonsynon	0.89		1	7	3.4	0	0	0	0	0	0	0	0	0	0	0	0	0	0	0	0	0	0	0	0	0	0	0	0	0	0	0	0	0	0	0	0	0	0	0
4986891	19	46046469	.	.	.	.	CYP2A6	cytochrome P450, family 2, subfamily A, polypeptide 6	Nonsynon	0.89	The Nicotine Metabolism System	.	.	3.4	1	0	0	0	0	0	0	0	0	0	0	0	0	0	0	0	0	0	0	0	0	0	0	0	0	0	0	0	0	0	0	0	0	0	0
6100927	20	36790355	.	.	.	.	SLC32A1	solute carrier family 32 (GABA vesicular transporter), member 1	Nonsynon	0.89	The GABA System	.	.	3.4	0	0	0	0	0	0	0	0	0	0	0	0	0	0	0	0	0	0	0	0	0	0	0	0	0	0	0	0	0	0	0	0	0	0	0
8192466	11	27636683	0	0	0	0	BDNF	brain-derived neurotrophic factor	Nonsynon	0.89	Special	.	.	3.4	1	0	0	0	0	0	0	0	1	0	0	0	0	0	0	0	0	0	0	0	0	0	0	0	0	0	0	0	0	0	0	0	0	1	1
11544391	14	66717383	.	.	.	.	GPHN	gephyrin	Synon	0.89	Goldman Gene	0	3	3.4	0	0	0	0	0	0	0	0	0	0	0	0	0	0	0	0	0	0	0	0	0	0	0	0	0	0	0	0	0	0	0	0	0	0	0
12474273	2	165692460	0	0	0	0	SCN3A	sodium channel, voltage-gated, type III, alpha subunit	Nonsynon	0.89	Special	.	.	3.4	0	0	0	0	0	0	0	0	1	0	0	0	0	0	0	0	0	0	0	0	0	0	0	0	0	0	0	0	0	0	0	0	0	1	1
12617205	2	166602777	0	0	0	0	SCN1A	sodium channel, voltage-gated, type I, alpha subunit	Nonsynon	0.89	Special	.	.	3.4	0	0	0	0	0	0	0	0	0	0	0	0	0	0	0	0	0	0	0	0	0	0	0	0	0	0	0	0	0	0	0	0	0	0	0
17637756	6	10664896	0.008	0	0	0	GCNT2	glucosaminyl (N-acetyl) transferase 2, I-branching enzyme (I blood group)	Nonsynon	0.89		1	6	3.4	0	0	0	0	0	0	0	0	1	0	0	0	0	0	0	0	0	0	0	0	0	0	0	0	0	0	0	0	0	0	0	0	0	1	1
17855976	2	219797196	0	0	0	0	ATG9A	ATG9 autophagy related 9 homolog A (S. cerevisiae)	Nonsynon	0.89		1	6	3.4	0	0	0	0	0	0	0	0	1	0	0	0	0	0	0	0	0	0	0	0	0	0	0	0	0	0	0	0	0	0	0	0	0	1	1
28399440	19	46046500	.	.	.	.	CYP2A6	cytochrome P450, family 2, subfamily A, polypeptide 6	Nonsynon	0.89	The Nicotine Metabolism System	.	.	3.4	0	0	0	0	0	0	0	0	0	0	0	0	0	0	0	0	0	0	0	0	0	0	0	0	0	0	0	0	0	0	0	0	0	0	0
28399445	19	46046009	.	.	.	.	CYP2A6	cytochrome P450, family 2, subfamily A, polypeptide 6	Nonsynon	0.89	The Nicotine Metabolism System	.	.	3.4	0	0	0	0	0	0	0	0	0	0	0	0	0	0	0	0	0	0	0	0	0	0	0	0	0	0	0	0	0	0	0	0	0	0	0
28730623	4	100216954	.	.	.	.	ADH5	alcohol dehydrogenase 5 (class III), chi polypeptide	Nonsynon	0.89	The Alcohol System	.	.	3.4	0	0	0	0	0	0	0	0	0	0	0	0	0	0	0	0	0	0	0	0	0	0	0	0	0	0	0	0	0	0	0	0	0	0	0
28926178	18	13875438	.	.	.	.	MC2R	melanocortin 2 receptor (adrenocorticotropic hormone)	Nonsynon	0.89	Special	.	.	3.4	0	0	0	0	0	0	0	0	0	0	0	0	0	0	0	0	0	0	0	0	0	0	0	0	0	0	0	0	0	0	0	0	0	0	0
28926179	18	13875249	.	.	.	.	MC2R	melanocortin 2 receptor (adrenocorticotropic hormone)	Nonsynon	0.89	Special	.	.	3.4	0	0	0	0	0	0	0	0	0	0	0	0	0	0	0	0	0	0	0	0	0	0	0	0	0	0	0	0	0	0	0	0	0	0	0
28926180	18	13875073	.	.	.	.	MC2R	melanocortin 2 receptor (adrenocorticotropic hormone)	Nonsynon	0.89	Special	.	.	3.4	0	0	0	0	0	0	0	0	0	0	0	0	0	0	0	0	0	0	0	0	0	0	0	0	0	0	0	0	0	0	0	0	0	0	0
28926181	18	13874892	.	.	.	.	MC2R	melanocortin 2 receptor (adrenocorticotropic hormone)	Nonsynon	0.89	Special	.	.	3.4	0	0	0	0	0	0	0	0	0	0	0	0	0	0	0	0	0	0	0	0	0	0	0	0	0	0	0	0	0	0	0	0	0	0	0
28926182	18	13874685	.	.	.	.	MC2R	melanocortin 2 receptor (adrenocorticotropic hormone)	Nonsynon	0.89	Special	.	.	3.4	0	0	0	0	0	0	0	0	0	0	0	0	0	0	0	0	0	0	0	0	0	0	0	0	0	0	0	0	0	0	0	0	0	0	0
28940892	18	13874757	.	.	.	.	MC2R	melanocortin 2 receptor (adrenocorticotropic hormone)	Nonsynon	0.89	Special	.	.	3.4	0	0	0	0	0	0	0	0	0	0	0	0	0	0	0	0	0	0	0	0	0	0	0	0	0	0	0	0	0	0	0	0	0	0	0
34277950	19	46207783	.	.	.	.	CYP2B6	cytochrome P450, family 2, subfamily B, polypeptide 6	Nonsynon	0.89	The Nicotine Metabolism System	.	.	3.4	0	0	0	0	0	0	0	0	0	0	0	0	0	0	0	0	0	0	0	0	0	0	0	0	0	0	0	0	0	0	0	0	0	0	0
34303009	16	71385816	.	.	.	.	ATBF1	zinc finger homeobox 3	Nonsynon	0.89		1	9	3.4	0	0	0	0	0	0	0	0	0	0	0	0	0	0	0	0	0	0	0	0	0	0	0	0	0	0	0	0	0	0	0	0	0	0	0
34517228	20	36790385	.	.	.	.	SLC32A1	solute carrier family 32 (GABA vesicular transporter), member 1	Nonsynon	0.89	The GABA System	.	.	3.4	0	0	0	0	0	0	0	0	0	0	0	0	0	0	0	0	0	0	0	0	0	0	0	0	0	0	0	0	0	0	0	0	0	0	0
34698757	19	46207833	.	.	.	.	CYP2B6	cytochrome P450, family 2, subfamily B, polypeptide 6	Nonsynon	0.89	The Nicotine Metabolism System	.	.	3.4	0	0	0	0	0	0	0	0	0	0	0	0	0	0	0	0	0	0	0	0	0	0	0	0	0	0	0	0	0	0	0	0	0	0	0
35455503	12	88268525	.	.	.	.	DUSP6	dual specificity phosphatase 6	Nonsynon	0.89	Special	.	.	3.4	0	0	0	0	0	0	0	0	0	0	0	0	0	0	0	0	0	0	0	0	0	0	0	0	0	0	0	0	0	0	0	0	0	0	0
35642887	17	24263938	.	.	.	.	PHF12	PHD finger protein 12	Nonsynon	0.89		1	6	3.4	0	0	0	0	0	0	0	0	0	0	0	0	0	0	0	0	0	0	0	0	0	0	0	0	0	0	0	0	0	0	0	0	0	0	0
35900695	9	108730865	.	.	.	.	ZNF462	zinc finger protein 462	Nonsynon	0.89		1	9	3.4	0	0	0	0	0	0	0	0	0	0	0	0	0	0	0	0	0	0	0	0	0	0	0	0	0	0	0	0	0	0	0	0	0	0	0
36120015	1	65847052	.	.	.	.	LEPR	leptin receptor	Nonsynon	0.89		1	11	3.4	0	0	0	0	0	0	0	0	0	0	0	0	0	0	0	0	0	0	0	0	0	0	0	0	0	0	0	0	0	0	0	0	0	0	0
41265127	2	233104347	.	.	.	.	CHRND	cholinergic receptor, nicotinic, delta	Nonsynon	0.89	The Nicotine System	.	.	3.4	0	0	0	0	0	0	0	0	0	0	0	0	0	0	0	0	0	0	0	0	0	0	0	0	0	0	0	0	0	0	0	0	0	0	0
41277821	9	108729793	.	.	.	.	ZNF462	zinc finger protein 462	Nonsynon	0.89		1	9	3.4	0	0	0	0	0	0	0	0	0	0	0	0	0	0	0	0	0	0	0	0	0	0	0	0	0	0	0	0	0	0	0	0	0	0	0
41277823	9	108730944	.	.	.	.	ZNF462	zinc finger protein 462	Nonsynon	0.89		1	9	3.4	0	0	0	0	0	0	0	0	0	0	0	0	0	0	0	0	0	0	0	0	0	0	0	0	0	0	0	0	0	0	0	0	0	0	0
41311135	3	38597731	.	.	.	.	SCN5A	sodium channel, voltage-gated, type V, alpha subunit	Nonsynon	0.89	Special	.	.	3.4	0	0	0	0	0	0	0	0	0	0	0	0	0	0	0	0	0	0	0	0	0	0	0	0	0	0	0	0	0	0	0	0	0	0	0
41313667	3	38597697	.	.	.	.	SCN5A	sodium channel, voltage-gated, type V, alpha subunit	Nonsynon	0.89	Special	.	.	3.4	0	0	0	0	0	0	0	0	0	0	0	0	0	0	0	0	0	0	0	0	0	0	0	0	0	0	0	0	0	0	0	0	0	0	0
45439799	23	76742677	.	.	.	.	ATRX	alpha thalassemia/mental retardation syndrome X-linked (RAD54 homolog, S. cerevisiae)	Nonsynon	0.89		1	9	3.4	0	0	0	0	0	0	0	0	0	0	0	0	0	0	0	0	0	0	0	0	0	0	0	0	0	0	0	0	0	0	0	0	0	0	0
45491996	3	38597533	.	.	.	.	SCN5A	sodium channel, voltage-gated, type V, alpha subunit	Nonsynon	0.89	Special	.	.	3.4	0	0	0	0	0	0	0	0	0	0	0	0	0	0	0	0	0	0	0	0	0	0	0	0	0	0	0	0	0	0	0	0	0	0	0
439880	2	219554949	.	.	.	.	FEV	FEV (ETS oncogene family)	Nonsynon	0.88		1	9	3.39	0	0	0	0	0	0	0	0	0	0	0	0	0	0	0	0	0	0	0	0	0	0	0	0	0	0	0	0	0	0	0	0	0	0	0
539351	6	10695024	0	0.045	0.057	0	GCNT2	glucosaminyl (N-acetyl) transferase 2, I-branching enzyme (I blood group)	Nonsynon	0.88		1	6	3.39	0	0	0	0	0	0	0	0	0	0	0	0	0	0	0	0	0	0	0	0	0	0	0	0	0	0	0	0	0	0	0	0	0	0	0
594495	6	10694915	0	0	0	0.089	GCNT2	glucosaminyl (N-acetyl) transferase 2, I-branching enzyme (I blood group)	Nonsynon	0.88		1	6	3.39	0	0	0	0	0	0	0	1	1	0	0	0	0	0	0	0	0	0	0	0	0	0	0	0	0	0	0	0	0	1	1	1	1	1	1
1041967	17	1287115	0	0	0	0	CRK	v-crk sarcoma virus CT10 oncogene homolog (avian)	Nonsynon	0.88		1	7	3.39	0	0	0	0	0	0	0	0	0	0	0	0	0	0	0	0	0	0	0	0	0	0	0	0	0	0	0	0	0	0	0	0	0	0	0
1057306	2	219465887	.	.	.	.	WNT10A	wingless-type MMTV integration site family, member 10A	Nonsynon	0.88		1	7	3.39	0	0	0	0	0	0	0	0	0	0	0	0	0	0	0	0	0	0	0	0	0	0	0	0	0	0	0	0	0	0	0	0	0	0	0
1065316	13	34948068	0	0	0	0	MAB21L1	mab-21-like 1 (C. elegans)	Nonsynon	0.88		1	6	3.39	0	0	0	0	0	0	0	0	0	0	0	0	0	0	0	0	0	0	0	0	0	0	0	0	0	0	0	0	0	0	0	0	0	0	0
1126441	4	100456148	.	.	.	.	ADH1B	alcohol dehydrogenase 1B (class I), beta polypeptide	Nonsynon	0.88	The Alcohol System	.	.	3.39	0	0	0	0	0	0	0	0	0	0	0	0	0	0	0	0	0	0	0	0	0	0	0	0	0	0	0	0	0	0	0	0	0	0	0
2228980	2	165909471	.	.	.	.	SCN2A2	sodium channel, voltage-gated, type II, alpha subunit	Nonsynon	0.88	Special	.	.	3.39	0	0	0	0	0	0	0	0	0	0	0	0	0	0	0	0	0	0	0	0	0	0	0	0	0	0	0	0	0	0	0	0	0	0	0
2228988	2	165878495	.	.	.	.	SCN2A2	sodium channel, voltage-gated, type II, alpha subunit	Nonsynon	0.88	Special	.	.	3.39	0	0	0	0	0	0	0	0	0	0	0	0	0	0	0	0	0	0	0	0	0	0	0	0	0	0	0	0	0	0	0	0	0	0	0
2279574	12	88269608	0.388	0.267	0.489	0.325	DUSP6	dual specificity phosphatase 6	Nonsynon	0.88	Special	.	.	3.39	0	0	0	0	1	1	1	1	1	1	1	1	0	1	1	1	0	1	1	1	1	1	1	1	1	1	1	1	1	1	1	1	1	1	1
2530066	17	15561085	.	.	.	.	ZNF286	zinc finger protein 286A	Nonsynon	0.88		1	6	3.39	0	0	0	0	0	0	0	0	0	0	0	0	0	0	0	0	0	0	0	0	0	0	0	0	0	0	0	0	0	0	0	0	0	0	0
2530068	17	15560664	0	0	0	0	ZNF286	zinc finger protein 286A	Nonsynon	0.88		1	6	3.39	0	0	0	0	0	0	0	0	0	0	0	0	0	0	0	0	0	0	0	0	0	0	0	0	0	0	0	0	0	0	0	0	0	0	0
2530069	17	15560331	.	.	.	.	ZNF286	zinc finger protein 286A	Nonsynon	0.88		1	6	3.39	0	0	0	0	0	0	0	0	0	0	0	0	0	0	0	0	0	0	0	0	0	0	0	0	0	0	0	0	0	0	0	0	0	0	0
2530070	17	15560255	.	.	.	.	ZNF286	zinc finger protein 286A	Nonsynon	0.88		1	6	3.39	0	0	0	0	0	0	0	0	0	0	0	0	0	0	0	0	0	0	0	0	0	0	0	0	0	0	0	0	0	0	0	0	0	0	0
2530071	17	15560100	.	.	.	.	ZNF286	zinc finger protein 286A	Nonsynon	0.88		1	6	3.39	0	0	0	0	0	0	0	0	0	0	0	0	0	0	0	0	0	0	0	0	0	0	0	0	0	0	0	0	0	0	0	0	0	0	0
5874284	6	10694280	.	.	.	.	GCNT2	glucosaminyl (N-acetyl) transferase 2, I-branching enzyme (I blood group)	Nonsynon	0.88		1	6	3.39	0	0	0	0	0	0	0	0	0	0	0	0	0	0	0	0	0	0	0	0	0	0	0	0	0	0	0	0	0	0	0	0	0	0	0
6599241	3	38714578	0	0	0	0	SCN10A	sodium channel, voltage-gated, type X, alpha subunit	Nonsynon	0.88	Special	.	.	3.39	0	0	0	0	0	0	0	0	1	0	0	0	0	0	0	0	0	0	0	0	0	0	0	0	0	0	0	0	0	0	0	0	0	1	1
8192530	1	19865281	.	.	.	.	HTR6	5-hydroxytryptamine (serotonin) receptor 6	Nonsynon	0.88	The Serotonergic System	.	.	3.39	0	0	0	0	0	0	0	0	0	0	0	0	0	0	0	0	0	0	0	0	0	0	0	0	0	0	0	0	0	0	0	0	0	0	0
11541118	3	115552783	.	.	.	.	ZBTB20	zinc finger and BTB domain containing 20	Nonsynon	0.88		1	6	3.39	0	0	0	0	0	0	0	0	0	0	0	0	0	0	0	0	0	0	0	0	0	0	0	0	0	0	0	0	0	0	0	0	0	0	0
11543132	9	14297131	.	.	.	.	NFIB	nuclear factor I/B	Nonsynon	0.88		1	6	3.39	0	0	0	0	0	0	0	0	0	0	0	0	0	0	0	0	0	0	0	0	0	0	0	0	0	0	0	0	0	0	0	0	0	0	0
11544140	17	1287121	0	0	0	0	CRK	v-crk sarcoma virus CT10 oncogene homolog (avian)	Nonsynon	0.88		1	7	3.39	0	0	0	0	0	0	0	0	0	0	0	0	0	0	0	0	0	0	0	0	0	0	0	0	0	0	0	0	0	0	0	0	0	0	0
11707331	3	38743354	.	.	.	.	SCN10A	sodium channel, voltage-gated, type X, alpha subunit	Nonsynon	0.88	Special	.	.	3.39	0	0	0	0	0	0	0	0	0	0	0	0	0	0	0	0	0	0	0	0	0	0	0	0	0	0	0	0	0	0	0	0	0	0	0
11711062	3	38728736	0	0	0	0	SCN10A	sodium channel, voltage-gated, type X, alpha subunit	Nonsynon	0.88	Special	.	.	3.39	0	0	0	0	0	0	0	0	0	0	0	0	0	0	0	0	0	0	0	0	0	0	0	0	0	0	0	0	0	0	0	0	0	0	0
11966400	6	10694467	0	0	0	0	GCNT2	glucosaminyl (N-acetyl) transferase 2, I-branching enzyme (I blood group)	Nonsynon	0.88		1	6	3.39	0	0	0	0	0	0	0	0	0	0	0	0	0	0	0	0	0	0	0	0	0	0	0	0	0	0	0	0	0	0	0	0	0	0	0
12368261	12	4789773	.	.	.	.	KCNA6	potassium voltage-gated channel, shaker-related subfamily, member 6	Nonsynon	0.88	Special	.	.	3.39	0	0	0	0	0	0	0	0	0	0	0	0	0	0	0	0	0	0	0	0	0	0	0	0	0	0	0	0	0	0	0	0	0	0	0
12912656	15	31390554	.	.	.	.	RYR3	ryanodine receptor 3	Nonsynon	0.88	Special	.	.	3.39	0	0	0	0	0	0	0	0	0	0	0	0	0	0	0	0	0	0	0	0	0	0	0	0	0	0	0	0	0	0	0	0	0	0	0
16929354	10	73223066	0	0	0	0	CDH23	cadherin-like 23	Nonsynon	0.88		1	8	3.39	0	0	0	0	0	0	0	0	1	0	0	0	0	0	0	0	0	0	0	0	0	0	0	0	0	0	0	0	0	0	0	0	0	1	1
17850674	4	158477325	.	.	.	.	GRIA2	glutamate receptor, ionotropic, AMPA 2	Nonsynon	0.88	The Glutamatergic System	.	.	3.39	0	0	0	0	0	0	0	0	0	0	0	0	0	0	0	0	0	0	0	0	0	0	0	0	0	0	0	0	0	0	0	0	0	0	0
17850675	4	158477328	.	.	.	.	GRIA2	glutamate receptor, ionotropic, AMPA 2	Nonsynon	0.88	The Glutamatergic System	.	.	3.39	0	0	0	0	0	0	0	0	0	0	0	0	0	0	0	0	0	0	0	0	0	0	0	0	0	0	0	0	0	0	0	0	0	0	0
17852629	3	115551987	.	.	.	.	ZBTB20	zinc finger and BTB domain containing 20	Nonsynon	0.88		1	6	3.39	0	0	0	0	0	0	0	0	0	0	0	0	0	0	0	0	0	0	0	0	0	0	0	0	0	0	0	0	0	0	0	0	0	0	0
28580102	9	114376304	.	.	.	.	KIAA1958	KIAA1958	Nonsynon	0.88		1	7	3.39	0	0	0	0	0	0	0	0	0	0	0	0	0	0	0	0	0	0	0	0	0	0	0	0	0	0	0	0	0	0	0	0	0	0	0
28720152	4	100350641	.	.	.	.	ADH6	alcohol dehydrogenase 6 (class V)	Nonsynon	0.88	The Alcohol System	.	.	3.39	0	0	0	0	0	0	0	0	0	0	0	0	0	0	0	0	0	0	0	0	0	0	0	0	0	0	0	0	0	0	0	0	0	0	0
28720153	4	100350605	.	.	.	.	ADH6	alcohol dehydrogenase 6 (class V)	Nonsynon	0.88	The Alcohol System	.	.	3.39	0	0	0	0	0	0	0	0	0	0	0	0	0	0	0	0	0	0	0	0	0	0	0	0	0	0	0	0	0	0	0	0	0	0	0
28931591	20	61452356	.	.	.	.	CHRNA4	cholinergic receptor, nicotinic, alpha 4	Nonsynon	0.88	The Nicotine System	.	.	3.39	0	0	0	0	0	0	0	0	0	0	0	0	0	0	0	0	0	0	0	0	0	0	0	0	0	0	0	0	0	0	0	0	0	0	0
34195308	4	100485113	.	.	.	.	ADH1C	alcohol dehydrogenase 1C (class I), gamma polypeptide	Nonsynon	0.88	The Alcohol System	.	.	3.39	0	0	0	0	0	0	0	0	0	0	0	0	0	0	0	0	0	0	0	0	0	0	0	0	0	0	0	0	0	0	0	0	0	0	0
34236496	10	73142455	.	.	.	.	CDH23	cadherin-like 23	Nonsynon	0.88		1	8	3.39	0	0	0	0	0	0	0	0	0	0	0	0	0	0	0	0	0	0	0	0	0	0	0	0	0	0	0	0	0	0	0	0	0	0	0
34242194	10	73142502	.	.	.	.	CDH23	cadherin-like 23	Nonsynon	0.88		1	8	3.39	0	0	0	0	0	0	0	0	0	0	0	0	0	0	0	0	0	0	0	0	0	0	0	0	0	0	0	0	0	0	0	0	0	0	0
34461402	16	472526	.	.	.	.	RAB11FIP3	RAB11 family interacting protein 3 (class II)	Nonsynon	0.88		1	6	3.39	0	0	0	0	0	0	0	0	0	0	0	0	0	0	0	0	0	0	0	0	0	0	0	0	0	0	0	0	0	0	0	0	0	0	0
34489220	15	24344247	.	.	.	.	GABRB3	gamma-aminobutyric acid (GABA) A receptor, beta 3	Nonsynon	0.88	The GABA System	.	.	3.39	0	0	0	0	0	0	0	0	0	0	0	0	0	0	0	0	0	0	0	0	0	0	0	0	0	0	0	0	0	0	0	0	0	0	0
34582580	4	100350378	.	.	.	.	ADH6	alcohol dehydrogenase 6 (class V)	Nonsynon	0.88	The Alcohol System	.	.	3.39	0	0	0	0	0	0	0	0	0	0	0	0	0	0	0	0	0	0	0	0	0	0	0	0	0	0	0	0	0	0	0	0	0	0	0
34930770	17	1286914	.	.	.	.	CRK	v-crk sarcoma virus CT10 oncogene homolog (avian)	Nonsynon	0.88		1	7	3.39	0	0	0	0	0	0	0	0	0	0	0	0	0	0	0	0	0	0	0	0	0	0	0	0	0	0	0	0	0	0	0	0	0	0	0
35860644	2	165934975	.	.	.	.	SCN2A2	sodium channel, voltage-gated, type II, alpha subunit	Nonsynon	0.88	Special	.	.	3.39	0	0	0	0	0	0	0	0	0	0	0	0	0	0	0	0	0	0	0	0	0	0	0	0	0	0	0	0	0	0	0	0	0	0	0
35865328	10	73142432	.	.	.	.	CDH23	cadherin-like 23	Nonsynon	0.88		1	8	3.39	0	0	0	0	0	0	0	0	0	0	0	0	0	0	0	0	0	0	0	0	0	0	0	0	0	0	0	0	0	0	0	0	0	0	0
41281310	10	73142500	.	.	.	.	CDH23	cadherin-like 23	Nonsynon	0.88		1	8	3.39	0	0	0	0	0	0	0	0	0	0	0	0	0	0	0	0	0	0	0	0	0	0	0	0	0	0	0	0	0	0	0	0	0	0	0
41311061	3	38622471	.	.	.	.	SCN5A	sodium channel, voltage-gated, type V, alpha subunit	Nonsynon	0.88	Special	.	.	3.39	0	0	0	0	0	0	0	0	0	0	0	0	0	0	0	0	0	0	0	0	0	0	0	0	0	0	0	0	0	0	0	0	0	0	0
45556438	13	34947545	.	.	.	.	MAB21L1	mab-21-like 1 (C. elegans)	Nonsynon	0.88		1	6	3.39	0	0	0	0	0	0	0	0	0	0	0	0	0	0	0	0	0	0	0	0	0	0	0	0	0	0	0	0	0	0	0	0	0	0	0
45604738	20	61452047	.	.	.	.	CHRNA4	cholinergic receptor, nicotinic, alpha 4	Nonsynon	0.88	The Nicotine System	.	.	3.39	0	0	0	0	0	0	0	0	0	0	0	0	0	0	0	0	0	0	0	0	0	0	0	0	0	0	0	0	0	0	0	0	0	0	0
45612732	13	34947456	.	.	.	.	MAB21L1	mab-21-like 1 (C. elegans)	Nonsynon	0.88		1	6	3.39	0	0	0	0	0	0	0	0	0	0	0	0	0	0	0	0	0	0	0	0	0	0	0	0	0	0	0	0	0	0	0	0	0	0	0
4530	22	23159521	0	0	0.011	0.008	ADORA2A	adenosine A2a receptor	Nonsynon	0.87	Special	.	.	3.38	0	0	0	0	0	0	0	0	1	0	0	0	0	0	0	0	0	0	0	0	0	0	0	0	0	0	0	0	0	0	0	0	0	1	1
5893	5	76064302	0	0	0	0	F2R	coagulation factor II (thrombin) receptor	Nonsynon	0.87		1	9	3.38	0	0	0	0	0	0	0	0	0	0	0	0	0	0	0	0	0	0	0	0	0	0	0	0	0	0	0	0	0	0	0	0	0	0	0
15611	3	112335397	0.009	0	0	0	PVRL3	poliovirus receptor-related 3	Nonsynon	0.87		1	7	3.38	0	0	0	0	0	0	0	0	0	0	0	0	0	0	0	0	0	0	0	0	0	0	0	0	0	0	0	0	0	0	0	0	0	0	0
375436	2	219554847	.	.	.	.	FEV	FEV (ETS oncogene family)	Nonsynon	0.87		1	9	3.38	0	0	0	0	0	0	0	0	0	0	0	0	0	0	0	0	0	0	0	0	0	0	0	0	0	0	0	0	0	0	0	0	0	0	0
434331	2	219554781	.	.	.	.	FEV	FEV (ETS oncogene family)	Nonsynon	0.87		1	9	3.38	0	0	0	0	0	0	0	0	0	0	0	0	0	0	0	0	0	0	0	0	0	0	0	0	0	0	0	0	0	0	0	0	0	0	0
734784	20	43157041	0.45	0.155	0.14	0.4	KCNS1	potassium voltage-gated channel, delayed-rectifier, subfamily S, member 1	Nonsynon	0.87	Special	.	.	3.38	0	0	0	1	1	1	1	1	1	0	1	0	0	1	1	1	1	1	1	1	1	1	1	1	1	1	1	1	1	1	1	1	1	1	1
1039898	2	220138447	0.067	0.122	0.125	0.375	OBSL1	obscurin-like 1	Nonsynon	0.87		1	11	3.38	0	0	0	1	1	1	1	1	1	0	0	0	0	1	1	1	1	1	1	1	1	1	1	1	1	1	1	1	1	1	1	1	1	1	1
1042007	9	130052368	.	.	.	.	DNM1	dynamin 1	Nonsynon	0.87	Special	.	.	3.38	0	0	0	0	0	0	0	0	0	0	0	0	0	0	0	0	0	0	0	0	0	0	0	0	0	0	0	0	0	0	0	0	0	0	0
1055103	5	76064608	0	0	0	0	F2R	coagulation factor II (thrombin) receptor	Nonsynon	0.87		1	9	3.38	0	0	0	0	0	0	0	0	0	0	0	0	0	0	0	0	0	0	0	0	0	0	0	0	0	0	0	0	0	0	0	0	0	0	0
1130798	1	33563120	.	.	.	.	PHC2	polyhomeotic homolog 2 (Drosophila)	Nonsynon	0.87		1	6	3.38	0	0	0	0	0	0	0	0	0	0	0	0	0	0	0	0	0	0	0	0	0	0	0	0	0	0	0	0	0	0	0	0	0	0	0
1485174	3	7595828	0.292	0.167	0.133	0.092	GRM7	glutamate receptor, metabotropic 7	Synon	0.87	The Glutamatergic System	0	3	3.38	0	0	0	1	0	0	0	0	0	1	1	1	1	1	1	1	1	1	1	1	0	1	1	1	1	1	1	1	1	1	1	1	1	1	1
1485175	3	7595789	0.425	0.467	0.42	0.467	GRM7	glutamate receptor, metabotropic 7	Synon	0.87	The Glutamatergic System	0	3	3.38	0	0	0	0	1	1	1	1	1	1	1	1	0	1	1	1	0	1	1	1	1	1	1	1	1	1	1	1	1	1	1	1	1	1	1
1693482	4	100482988	0.483	0.023	0.081	0.052	ADH1C	alcohol dehydrogenase 1C (class I), gamma polypeptide	Nonsynon	0.87	The Alcohol System	.	.	3.38	0	1	0	0	0	0	0	0	0	1	0	1	1	1	0	1	1	1	0	1	1	1	0	1	1	1	0	1	1	1	0	1	1	1	0
1809810	19	46042504	.	.	.	.	CYP2A6	cytochrome P450, family 2, subfamily A, polypeptide 6	Nonsynon	0.87	The Nicotine Metabolism System	.	.	3.38	0	0	0	0	0	0	0	0	0	0	0	0	0	0	0	0	0	0	0	0	0	0	0	0	0	0	0	0	0	0	0	0	0	0	0
2227799	5	76065041	0	0	0	0	F2R	coagulation factor II (thrombin) receptor	Nonsynon	0.87		1	9	3.38	0	0	0	0	0	0	0	0	0	0	0	0	0	0	0	0	0	0	0	0	0	0	0	0	0	0	0	0	0	0	0	0	0	0	0
2227832	5	76064575	0	0	0	0	F2R	coagulation factor II (thrombin) receptor	Nonsynon	0.87		1	9	3.38	0	0	0	0	0	0	0	0	0	0	0	0	0	0	0	0	0	0	0	0	0	0	0	0	0	0	0	0	0	0	0	0	0	0	0
2230849	5	76064365	0	0	0	0	F2R	coagulation factor II (thrombin) receptor	Nonsynon	0.87		1	9	3.38	0	0	0	0	0	0	0	0	0	0	0	0	0	0	0	0	0	0	0	0	0	0	0	0	0	0	0	0	0	0	0	0	0	0	0
2307313	3	128820725	0	0	0	0	MCM2	minichromosome maintenance complex component 2	Nonsynon	0.87		1	7	3.38	0	0	0	0	0	0	0	0	1	0	0	0	0	0	0	0	0	0	0	0	0	0	0	0	0	0	0	0	0	0	0	0	0	1	1
2591714	5	36075381	0	0	0	0	UGT3A2	UDP glycosyltransferase 3 family, polypeptide A2	Nonsynon	0.87	The Nicotine Metabolism System	.	.	3.38	0	0	0	0	0	0	0	0	1	0	0	0	0	0	0	0	0	0	0	0	0	0	0	0	0	0	0	0	0	0	0	0	0	1	1
2644906	19	46043800	.	.	.	.	CYP2A6	cytochrome P450, family 2, subfamily A, polypeptide 6	Nonsynon	0.87	The Nicotine Metabolism System	.	.	3.38	0	0	0	0	0	0	0	0	0	0	0	0	0	0	0	0	0	0	0	0	0	0	0	0	0	0	0	0	0	0	0	0	0	0	0
2702304	15	32143294	0	0	0	0	CHRM5	cholinergic receptor, muscarinic 5	Nonsynon	0.87	The Cholinergic System	.	.	3.38	0	0	0	0	0	0	0	0	1	0	0	0	0	0	0	0	0	0	0	0	0	0	0	0	0	0	0	0	0	0	0	0	0	1	1
3756669	5	36001727	0.1	0.5	0.33	0.033	UGT3A1	UDP glycosyltransferase 3 family, polypeptide A1	Nonsynon	0.87	The Nicotine Metabolism System	.	.	3.38	0	0	0	1	1	1	1	1	1	0	0	0	0	1	1	1	1	1	1	1	1	1	1	1	1	1	1	1	1	1	1	1	1	1	1
4867440	5	32439103	0.042	0.089	0.067	0	ZFR	zinc finger RNA binding protein	Nonsynon	0.87		1	6	3.38	0	0	0	0	1	1	1	1	1	0	1	0	0	0	1	0	0	1	1	1	1	1	1	1	1	1	1	1	1	1	1	1	1	1	1
4997557	19	46043793	0	0	0.012	0	CYP2A6	cytochrome P450, family 2, subfamily A, polypeptide 6	Nonsynon	0.87	The Nicotine Metabolism System	.	.	3.38	0	0	0	0	0	0	0	0	0	0	0	0	0	0	0	0	0	0	0	0	0	0	0	0	0	0	0	0	0	0	0	0	0	0	0
5022368	9	108726782	0	0	0	0	ZNF462	zinc finger protein 462	Nonsynon	0.87		1	9	3.38	0	0	0	0	0	0	0	0	1	0	0	0	0	0	0	0	0	0	0	0	0	0	0	0	0	0	0	0	0	0	0	0	0	1	1
7264544	20	43156983	0	0	0	0.025	KCNS1	potassium voltage-gated channel, delayed-rectifier, subfamily S, member 1	Nonsynon	0.87	Special	.	.	3.38	0	0	0	0	0	0	0	0	1	0	0	0	0	0	0	0	0	0	0	0	0	0	0	0	0	0	0	0	0	0	0	0	0	1	1
7527017	1	64415865	0.433	0.278	0.389	0	ROR1	receptor tyrosine kinase-like orphan receptor 1	Nonsynon	0.87		1	6	3.38	0	0	1	1	1	1	1	1	1	1	1	1	1	1	1	1	1	1	1	1	1	1	1	1	1	1	1	1	1	1	1	1	1	1	1
7614915	3	7595382	0.25	0.151	0.085	0.085	GRM7	glutamate receptor, metabotropic 7	Synon	0.87	The Glutamatergic System	0	3	3.38	0	0	0	1	0	0	0	0	1	1	1	1	1	1	1	1	1	1	1	1	0	1	1	1	1	1	1	1	1	1	1	1	1	1	1
8192730	19	46042422	0	0	0	0.009	CYP2A6	cytochrome P450, family 2, subfamily A, polypeptide 6	Nonsynon	0.87	The Nicotine Metabolism System	.	.	3.38	0	0	0	0	0	0	0	0	0	0	0	0	0	0	0	0	0	0	0	0	0	0	0	0	0	0	0	0	0	0	0	0	0	0	0
10034345	4	94563065	0.052	0	0	0.182	GRID2	glutamate receptor, ionotropic, delta 2	Nonsynon	0.87	The Glutamatergic System	.	.	3.38	0	0	0	0	0	0	0	0	1	1	0	0	0	1	0	0	0	0	0	0	0	0	0	0	0	0	0	0	0	1	0	0	1	1	1
10037809	5	78459393	.	.	.	.	BHMT	betaine-homocysteine methyltransferase	Nonsynon	0.87		1	8	3.38	0	0	0	0	0	0	0	0	0	0	0	0	0	0	0	0	0	0	0	0	0	0	0	0	0	0	0	0	0	0	0	0	0	0	0
10987947	9	130052326	.	.	.	.	DNM1	dynamin 1	Nonsynon	0.87	Special	.	.	3.38	0	0	0	0	0	0	0	0	0	0	0	0	0	0	0	0	0	0	0	0	0	0	0	0	0	0	0	0	0	0	0	0	0	0	0
10989589	9	103473056	0.358	0.222	0.193	0.1	GRIN3A	glutamate receptor, ionotropic, N-methyl-D-aspartate 3A	Nonsynon	0.87	The Glutamatergic System	.	.	3.38	0	0	0	0	0	0	0	0	0	1	1	1	1	1	1	1	1	1	1	1	1	1	1	1	1	1	1	1	1	1	1	1	1	1	1
11541208	5	78452885	0	0	0	0	BHMT	betaine-homocysteine methyltransferase	Nonsynon	0.87		1	8	3.38	0	0	0	0	0	0	0	0	0	0	0	0	0	0	0	0	0	0	0	0	0	0	0	0	0	0	0	0	0	0	0	0	0	0	0
11541852	3	128820602	.	.	.	.	MCM2	minichromosome maintenance complex component 2	Nonsynon	0.87		1	7	3.38	0	0	0	0	0	0	0	0	0	0	0	0	0	0	0	0	0	0	0	0	0	0	0	0	0	0	0	0	0	0	0	0	0	0	0
11547217	22	35750336	.	.	.	.	MPST	mercaptopyruvate sulfurtransferase	Nonsynon	0.87		1	6	3.38	0	0	0	0	0	0	0	0	0	0	0	0	0	0	0	0	0	0	0	0	0	0	0	0	0	0	0	0	0	0	0	0	0	0	0
11554675	1	33563172	0	0	0	0	PHC2	polyhomeotic homolog 2 (Drosophila)	Nonsynon	0.87		1	6	3.38	0	0	0	0	0	0	0	0	0	0	0	0	0	0	0	0	0	0	0	0	0	0	0	0	0	0	0	0	0	0	0	0	0	0	0
11558990	2	174655006	.	.	.	.	PTD004	Obg-like ATPase 1	Nonsynon	0.87		1	6	3.38	0	0	0	0	0	0	0	0	0	0	0	0	0	0	0	0	0	0	0	0	0	0	0	0	0	0	0	0	0	0	0	0	0	0	0
11559128	14	20772140	.	.	.	.	HNRPC	heterogeneous nuclear ribonucleoprotein C (C1/C2)	Nonsynon	0.87		1	6	3.38	0	0	0	0	0	0	0	0	0	0	0	0	0	0	0	0	0	0	0	0	0	0	0	0	0	0	0	0	0	0	0	0	0	0	0
17723637	9	108727224	0.155	0.057	0.047	0.06	ZNF462	zinc finger protein 462	Nonsynon	0.87		1	9	3.38	0	0	0	0	0	0	0	0	1	1	1	0	1	1	1	0	1	1	1	0	1	1	1	0	1	1	1	0	1	1	1	0	1	1	1
17849599	5	76064810	.	.	.	.	F2R	coagulation factor II (thrombin) receptor	Nonsynon	0.87		1	9	3.38	0	0	0	0	0	0	0	0	0	0	0	0	0	0	0	0	0	0	0	0	0	0	0	0	0	0	0	0	0	0	0	0	0	0	0
17850321	14	20768985	.	.	.	.	HNRPC	heterogeneous nuclear ribonucleoprotein C (C1/C2)	Nonsynon	0.87		1	6	3.38	0	0	0	0	0	0	0	0	0	0	0	0	0	0	0	0	0	0	0	0	0	0	0	0	0	0	0	0	0	0	0	0	0	0	0
17850508	22	35750671	.	.	.	.	MPST	mercaptopyruvate sulfurtransferase	Nonsynon	0.87		1	6	3.38	0	0	0	0	0	0	0	0	0	0	0	0	0	0	0	0	0	0	0	0	0	0	0	0	0	0	0	0	0	0	0	0	0	0	0
17854161	15	32143244	.	.	.	.	CHRM5	cholinergic receptor, muscarinic 5	Nonsynon	0.87	The Cholinergic System	.	.	3.38	0	0	0	0	0	0	0	0	0	0	0	0	0	0	0	0	0	0	0	0	0	0	0	0	0	0	0	0	0	0	0	0	0	0	0
28360433	1	169521129	.	.	.	.	FMO1	flavin containing monooxygenase 1	Nonsynon	0.87	The Nicotine Metabolism System	.	.	3.38	1	0	0	0	0	0	0	0	0	0	0	0	0	0	0	0	0	0	0	0	0	0	0	0	0	0	0	0	0	0	0	0	0	0	0
28399434	19	46048159	.	.	.	.	CYP2A6	cytochrome P450, family 2, subfamily A, polypeptide 6	Nonsynon	0.87	The Nicotine Metabolism System	.	.	3.38	0	0	0	0	0	0	0	0	0	0	0	0	0	0	0	0	0	0	0	0	0	0	0	0	0	0	0	0	0	0	0	0	0	0	0
28399435	19	46048086	.	.	.	.	CYP2A6	cytochrome P450, family 2, subfamily A, polypeptide 6	Nonsynon	0.87	The Nicotine Metabolism System	.	.	3.38	0	0	0	0	0	0	0	0	0	0	0	0	0	0	0	0	0	0	0	0	0	0	0	0	0	0	0	0	0	0	0	0	0	0	0
28399454	19	46043107	.	.	.	.	CYP2A6	cytochrome P450, family 2, subfamily A, polypeptide 6	Nonsynon	0.87	The Nicotine Metabolism System	.	.	3.38	0	0	0	0	0	0	0	0	0	0	0	0	0	0	0	0	0	0	0	0	0	0	0	0	0	0	0	0	0	0	0	0	0	0	0
28399463	19	46042427	.	.	.	.	CYP2A6	cytochrome P450, family 2, subfamily A, polypeptide 6	Nonsynon	0.87	The Nicotine Metabolism System	.	.	3.38	0	0	0	0	0	0	0	0	0	0	0	0	0	0	0	0	0	0	0	0	0	0	0	0	0	0	0	0	0	0	0	0	0	0	0
34109134	1	64416249	.	.	.	.	ROR1	receptor tyrosine kinase-like orphan receptor 1	Nonsynon	0.87		1	6	3.38	0	0	0	0	0	0	0	0	0	0	0	0	0	0	0	0	0	0	0	0	0	0	0	0	0	0	0	0	0	0	0	0	0	0	0
34263615	9	103472468	.	.	.	.	GRIN3A	glutamate receptor, ionotropic, N-methyl-D-aspartate 3A	Nonsynon	0.87	The Glutamatergic System	.	.	3.38	0	0	0	0	0	0	0	0	0	0	0	0	0	0	0	0	0	0	0	0	0	0	0	0	0	0	0	0	0	0	0	0	0	0	0
34363746	2	220138478	.	.	.	.	OBSL1	obscurin-like 1	Nonsynon	0.87		1	11	3.38	0	0	0	0	0	0	0	0	0	0	0	0	0	0	0	0	0	0	0	0	0	0	0	0	0	0	0	0	0	0	0	0	0	0	0
34373930	3	7595168	.	.	.	.	GRM7	glutamate receptor, metabotropic 7	Synon	0.87	The Glutamatergic System	0	3	3.38	0	0	0	0	0	0	0	0	0	0	0	0	0	0	0	0	0	0	0	0	0	0	0	0	0	0	0	0	0	0	0	0	0	0	0
34427654	6	89964643	.	.	.	.	GABRR1	gamma-aminobutyric acid (GABA) receptor, rho 1	Nonsynon	0.87	The GABA System	.	.	3.38	0	0	0	0	0	0	0	0	0	0	0	0	0	0	0	0	0	0	0	0	0	0	0	0	0	0	0	0	0	0	0	0	0	0	0
34479049	16	71388772	.	.	.	.	ATBF1	zinc finger homeobox 3	Nonsynon	0.87		1	9	3.38	0	0	0	0	0	0	0	0	0	0	0	0	0	0	0	0	0	0	0	0	0	0	0	0	0	0	0	0	0	0	0	0	0	0	0
34585484	3	52500545	.	.	.	.	NISCH	nischarin	Nonsynon	0.87		1	8	3.38	0	0	0	0	0	0	0	0	0	0	0	0	0	0	0	0	0	0	0	0	0	0	0	0	0	0	0	0	0	0	0	0	0	0	0
34755188	9	103473076	.	.	.	.	GRIN3A	glutamate receptor, ionotropic, N-methyl-D-aspartate 3A	Nonsynon	0.87	The Glutamatergic System	.	.	3.38	0	0	0	0	0	0	0	0	0	0	0	0	0	0	0	0	0	0	0	0	0	0	0	0	0	0	0	0	0	0	0	0	0	0	0
34813653	3	89341991	.	.	.	.	EPHA3	EPH receptor A3	Nonsynon	0.87		1	10	3.38	0	0	0	0	0	0	0	0	0	0	0	0	0	0	0	0	0	0	0	0	0	0	0	0	0	0	0	0	0	0	0	0	0	0	0
34844857	14	66416439	.	.	.	.	GPHN	gephyrin	Synon	0.87	Goldman Gene	0	3	3.38	0	0	0	0	0	0	0	0	0	0	0	0	0	0	0	0	0	0	0	0	0	0	0	0	0	0	0	0	0	0	0	0	0	0	0
34972707	2	219466070	.	.	.	.	WNT10A	wingless-type MMTV integration site family, member 10A	Nonsynon	0.87		1	7	3.38	0	0	0	0	0	0	0	0	0	0	0	0	0	0	0	0	0	0	0	0	0	0	0	0	0	0	0	0	0	0	0	0	0	0	0
35074821	14	20771986	.	.	.	.	HNRPC	heterogeneous nuclear ribonucleoprotein C (C1/C2)	Nonsynon	0.87		1	6	3.38	0	0	0	0	0	0	0	0	0	0	0	0	0	0	0	0	0	0	0	0	0	0	0	0	0	0	0	0	0	0	0	0	0	0	0
35168892	1	64417070	.	.	.	.	ROR1	receptor tyrosine kinase-like orphan receptor 1	Nonsynon	0.87		1	6	3.38	0	0	0	0	0	0	0	0	0	0	0	0	0	0	0	0	0	0	0	0	0	0	0	0	0	0	0	0	0	0	0	0	0	0	0
35539063	3	112335283	.	.	.	.	PVRL3	poliovirus receptor-related 3	Nonsynon	0.87		1	7	3.38	0	0	0	0	0	0	0	0	0	0	0	0	0	0	0	0	0	0	0	0	0	0	0	0	0	0	0	0	0	0	0	0	0	0	0
35804366	19	19470415	.	.	.	.	GATAD2A	GATA zinc finger domain containing 2A	Nonsynon	0.87		1	7	3.38	0	0	0	0	0	0	0	0	0	0	0	0	0	0	0	0	0	0	0	0	0	0	0	0	0	0	0	0	0	0	0	0	0	0	0
35822832	18	3524224	.	.	.	.	DLGAP1	discs, large (Drosophila) homolog-associated protein 1	Nonsynon	0.87	Special	.	.	3.38	0	0	0	0	0	0	0	0	0	0	0	0	0	0	0	0	0	0	0	0	0	0	0	0	0	0	0	0	0	0	0	0	0	0	0
36002342	3	51722121	.	.	.	.	GRM2	glutamate receptor, metabotropic 2	Nonsynon	0.87	The Glutamatergic System	.	.	3.38	0	0	0	0	0	0	0	0	0	0	0	0	0	0	0	0	0	0	0	0	0	0	0	0	0	0	0	0	0	0	0	0	0	0	0
41305848	1	64415897	.	.	.	.	ROR1	receptor tyrosine kinase-like orphan receptor 1	Nonsynon	0.87		1	6	3.38	0	0	0	0	0	0	0	0	0	0	0	0	0	0	0	0	0	0	0	0	0	0	0	0	0	0	0	0	0	0	0	0	0	0	0
45487792	1	169577531	.	.	.	.	FMO4	flavin containing monooxygenase 4	Nonsynon	0.87	The Nicotine Metabolism System	.	.	3.38	0	0	0	0	0	0	0	0	0	0	0	0	0	0	0	0	0	0	0	0	0	0	0	0	0	0	0	0	0	0	0	0	0	0	0
45528740	1	169577556	.	.	.	.	FMO4	flavin containing monooxygenase 4	Nonsynon	0.87	The Nicotine Metabolism System	.	.	3.38	0	0	0	0	0	0	0	0	0	0	0	0	0	0	0	0	0	0	0	0	0	0	0	0	0	0	0	0	0	0	0	0	0	0	0
45589741	3	38582996	.	.	.	.	SCN5A	sodium channel, voltage-gated, type V, alpha subunit	Nonsynon	0.87	Special	.	.	3.38	0	0	0	0	0	0	0	0	0	0	0	0	0	0	0	0	0	0	0	0	0	0	0	0	0	0	0	0	0	0	0	0	0	0	0
15063	3	71091153	.	.	.	.	FOXP1	forkhead box P1	Nonsynon	0.86		1	8	3.37	0	0	0	0	0	0	0	0	0	0	0	0	0	0	0	0	0	0	0	0	0	0	0	0	0	0	0	0	0	0	0	0	0	0	0
1051696	15	71201972	0	0	0	0	NEO1	neogenin homolog 1 (chicken)	Nonsynon	0.86		1	6	3.37	0	0	0	0	0	0	0	0	0	0	0	0	0	0	0	0	0	0	0	0	0	0	0	0	0	0	0	0	0	0	0	0	0	0	0
1053174	2	191232868	.	.	.	.	NAB1	NGFI-A binding protein 1 (EGR1 binding protein 1)	Nonsynon	0.86		1	8	3.37	0	0	0	0	0	0	0	0	0	0	0	0	0	0	0	0	0	0	0	0	0	0	0	0	0	0	0	0	0	0	0	0	0	0	0
1053175	2	191232878	0	0	0	0	NAB1	NGFI-A binding protein 1 (EGR1 binding protein 1)	Nonsynon	0.86		1	8	3.37	0	0	0	0	0	0	0	0	0	0	0	0	0	0	0	0	0	0	0	0	0	0	0	0	0	0	0	0	0	0	0	0	0	0	0
1053176	2	191232895	0	0	0	0	NAB1	NGFI-A binding protein 1 (EGR1 binding protein 1)	Nonsynon	0.86		1	8	3.37	0	0	0	0	0	0	0	0	0	0	0	0	0	0	0	0	0	0	0	0	0	0	0	0	0	0	0	0	0	0	0	0	0	0	0
1063241	10	104404926	0	0	0.012	0	TRIM8	tripartite motif-containing 8	Nonsynon	0.86		1	6	3.37	0	0	0	0	0	0	0	0	0	0	0	0	0	0	0	0	0	0	0	0	0	0	0	0	0	0	0	0	0	0	0	0	0	0	0
1126588	10	49302187	.	.	.	.	MAPK8	mitogen-activated protein kinase 8	Nonsynon	0.86	Special	.	.	3.37	0	0	0	0	0	0	0	0	0	0	0	0	0	0	0	0	0	0	0	0	0	0	0	0	0	0	0	0	0	0	0	0	0	0	0
1176739	11	113313027	0.025	0	0	0.242	HTR3B	5-hydroxytryptamine (serotonin) receptor 3B	Intron	0.86	The Serotonergic System	1	7	3.37	0	0	1	1	0	0	0	0	0	1	1	1	1	1	1	1	1	0	0	0	0	0	0	0	1	0	0	0	1	0	0	0	1	0	0
1176740	11	113312606	0.017	0	0	0.242	HTR3B	5-hydroxytryptamine (serotonin) receptor 3B	Intron	0.86	The Serotonergic System	1	7	3.37	0	0	1	1	0	0	0	0	0	1	1	1	1	1	1	1	1	0	0	0	0	0	0	0	1	0	0	0	1	0	0	0	1	0	0
1805038	2	218737969	0	0	0	0	IL8RA	interleukin 8 receptor, alpha	Nonsynon	0.86		1	6	3.37	0	0	0	0	0	0	0	0	1	0	0	0	0	0	0	0	0	0	0	0	0	0	0	0	0	0	0	0	0	0	0	0	0	1	1
2055780	17	54412900	0	0	0	0	PPM1E	protein phosphatase 1E (PP2C domain containing)	Nonsynon	0.86		1	7	3.37	0	0	0	0	0	0	0	0	1	0	0	0	0	0	0	0	0	0	0	0	0	0	0	0	0	0	0	0	0	0	0	0	0	1	1
2108433	17	54412710	0	0	0	0	PPM1E	protein phosphatase 1E (PP2C domain containing)	Nonsynon	0.86		1	7	3.37	0	0	0	0	0	0	0	0	1	0	0	0	0	0	0	0	0	0	0	0	0	0	0	0	0	0	0	0	0	0	0	0	0	1	1
2234671	2	218737353	.	.	.	.	IL8RA	interleukin 8 receptor, alpha	Nonsynon	0.86		1	6	3.37	0	0	0	0	0	0	0	0	0	0	0	0	0	0	0	0	0	0	0	0	0	0	0	0	0	0	0	0	0	0	0	0	0	0	0
2782948	1	206457877	.	.	.	.	PLXNA2	plexin A2	Nonsynon	0.86		1	8	3.37	0	0	0	0	0	0	0	0	0	0	0	0	0	0	0	0	0	0	0	0	0	0	0	0	0	0	0	0	0	0	0	0	0	0	0
3748735	1	206457092	0.117	0.114	0.128	0.067	PLXNA2	plexin A2	Nonsynon	0.86		1	8	3.37	0	0	0	1	1	1	1	1	1	0	0	0	0	1	1	1	1	1	1	1	1	1	1	1	1	1	1	1	1	1	1	1	1	1	1
3749380	3	6878297	0.45	0.367	0.356	0.325	GRM7	glutamate receptor, metabotropic 7	Synon	0.86	The Glutamatergic System	0	3	3.37	0	0	1	1	0	0	0	0	1	1	1	1	1	1	1	1	1	0	0	0	0	0	0	0	0	0	0	0	0	0	0	0	0	1	1
3768721	2	46840305	0	.	.	.	SOCS5	suppressor of cytokine signaling 5	Nonsynon	0.86		1	7	3.37	0	0	0	0	0	0	0	0	0	0	0	0	0	0	0	0	0	0	0	0	0	0	0	0	0	0	0	0	0	0	0	0	0	0	0
3782025	11	113312817	0.467	0.33	0.256	0.392	HTR3B	5-hydroxytryptamine (serotonin) receptor 3B	Intron	0.86	The Serotonergic System	1	7	3.37	0	1	0	0	1	1	1	1	1	0	0	0	0	0	0	0	0	1	1	1	1	1	1	1	1	1	1	1	1	1	1	1	1	1	1
3803460	15	54174898	0	0.056	0.034	0	RFXDC2	regulatory factor X domain containing 2	Nonsynon	0.86		1	9	3.37	0	0	0	0	0	0	0	0	0	0	0	0	0	0	0	0	0	0	0	0	0	0	0	0	0	0	0	0	0	0	0	0	0	0	0
4844658	1	206456785	0.216	0.189	0.136	0	PLXNA2	plexin A2	Nonsynon	0.86		1	8	3.37	0	0	0	0	0	0	0	0	1	1	1	1	0	1	1	1	0	1	1	1	0	1	1	1	0	1	1	1	0	1	1	1	0	1	1
5995741	22	38214029	0	0	0	0	MGAT3	mannosyl (beta-1,4-)-glycoprotein beta-1,4-N-acetylglucosaminyltransferase	Nonsynon	0.86		1	6	3.37	0	0	0	0	0	0	0	0	1	0	0	0	0	0	0	0	0	0	0	0	0	0	0	0	0	0	0	0	0	0	0	0	0	1	1
6591771	11	62688060	.	.	.	.	LOC387601	solute carrier family 22, member 25	Nonsynon	0.86		1	6	3.37	0	0	0	0	0	0	0	0	0	0	0	0	0	0	0	0	0	0	0	0	0	0	0	0	0	0	0	0	0	0	0	0	0	0	0
6898012	5	88092799	0	0	0	0	MEF2C	myocyte enhancer factor 2C	Nonsynon	0.86		1	14	3.37	0	0	0	0	0	0	0	0	0	0	0	0	0	0	0	0	0	0	0	0	0	0	0	0	0	0	0	0	0	0	0	0	0	0	0
7107481	11	46364349	0	0	0	0	CHRM4	cholinergic receptor, muscarinic 4	Nonsynon	0.86	The Cholinergic System	.	.	3.37	0	0	0	0	0	0	0	0	1	0	0	0	0	0	0	0	0	0	0	0	0	0	0	0	0	0	0	0	0	0	0	0	0	1	1
7588124	2	32594199	0	0	0	0.033	BIRC6	baculoviral IAP repeat-containing 6 (apollon)	Nonsynon	0.86		1	9	3.37	0	0	0	0	0	0	0	0	0	0	0	0	0	0	0	0	0	0	0	0	0	0	0	0	0	0	0	0	0	0	0	0	0	0	0
9282752	2	218737378	.	.	.	.	IL8RA	interleukin 8 receptor, alpha	Nonsynon	0.86		1	6	3.37	0	0	0	0	0	0	0	0	0	0	0	0	0	0	0	0	0	0	0	0	0	0	0	0	0	0	0	0	0	0	0	0	0	0	0
9611185	22	38214346	.	.	.	.	MGAT3	mannosyl (beta-1,4-)-glycoprotein beta-1,4-N-acetylglucosaminyltransferase	Nonsynon	0.86		1	6	3.37	0	0	0	0	0	0	0	0	0	0	0	0	0	0	0	0	0	0	0	0	0	0	0	0	0	0	0	0	0	0	0	0	0	0	0
10217192	9	108812966	0.108	0	0	0.2	ZNF462	zinc finger protein 462	Nonsynon	0.86		1	9	3.37	0	0	0	0	0	0	0	0	1	1	0	0	0	1	0	0	1	1	0	0	1	1	0	0	1	1	0	0	1	1	0	0	1	1	1
10225567	7	125866431	0	0	0	0	GRM8	glutamate receptor, metabotropic 8	Nonsynon	0.86	The Glutamatergic System	.	.	3.37	0	0	0	0	0	0	0	0	1	0	0	0	0	0	0	0	0	0	0	0	0	0	0	0	0	0	0	0	0	0	0	0	0	1	1
11119014	1	206457721	0.051	0.067	0.159	0.033	PLXNA2	plexin A2	Nonsynon	0.86		1	8	3.37	0	0	0	0	0	0	0	0	1	0	0	0	0	1	0	1	0	0	0	0	0	1	0	1	0	1	0	1	0	1	0	1	0	1	1
11284377	2	32593840	.	.	.	.	BIRC6	baculoviral IAP repeat-containing 6 (apollon)	Nonsynon	0.86		1	9	3.37	0	0	0	0	0	0	0	0	0	0	0	0	0	0	0	0	0	0	0	0	0	0	0	0	0	0	0	0	0	0	0	0	0	0	0
11556323	3	143154086	0	0	0	0	TFDP2	transcription factor Dp-2 (E2F dimerization partner 2)	Nonsynon	0.86		1	6	3.37	0	0	0	0	0	0	0	0	0	0	0	0	0	0	0	0	0	0	0	0	0	0	0	0	0	0	0	0	0	0	0	0	0	0	0
11558725	1	109923376	.	.	.	.	GNAI3	guanine nucleotide binding protein (G protein), alpha inhibiting activity polypeptide 3	Nonsynon	0.86	Special	.	.	3.37	0	0	0	0	0	0	0	0	0	0	0	0	0	0	0	0	0	0	0	0	0	0	0	0	0	0	0	0	0	0	0	0	0	0	0
11912559	22	38391457	.	.	.	.	CACNA1I	calcium channel, voltage-dependent, T type, alpha 1I subunit	Nonsynon	0.86	Special	.	.	3.37	0	0	0	0	0	0	0	0	0	0	0	0	0	0	0	0	0	0	0	0	0	0	0	0	0	0	0	0	0	0	0	0	0	0	0
12519525	5	102546864	0	0	0	0	HISPPD1	histidine acid phosphatase domain containing 1	Nonsynon	0.86		1	6	3.37	0	0	0	0	0	0	0	0	1	0	0	0	0	0	0	0	0	0	0	0	0	0	0	0	0	0	0	0	0	0	0	0	0	1	1
12520040	5	102546919	0.009	0	0	0	HISPPD1	histidine acid phosphatase domain containing 1	Nonsynon	0.86		1	6	3.37	0	0	0	0	0	0	0	0	0	0	0	0	0	0	0	0	0	0	0	0	0	0	0	0	0	0	0	0	0	0	0	0	0	0	0
13182512	5	78609546	0.362	0.42	0.464	0.353	JMY	-	Nonsynon	0.86		1	6	3.37	0	0	0	0	0	0	0	0	1	1	1	1	1	1	1	1	1	1	1	1	1	1	1	1	1	1	1	1	1	1	1	1	1	1	1
13420841	2	64539040	0	0	0	0	HSPC159	-	Nonsynon	0.86		1	10	3.37	0	0	0	0	0	0	0	0	1	0	0	0	0	0	0	0	0	0	0	0	0	0	0	0	0	0	0	0	0	0	0	0	0	1	1
13437446	6	163904630	0	0	0	0	QKI	quaking homolog, KH domain RNA binding (mouse)	Nonsynon	0.86		1	7	3.37	0	0	0	0	0	0	0	0	1	0	0	0	0	0	0	0	0	0	0	0	0	0	0	0	0	0	0	0	0	0	0	0	0	1	1
16858806	2	218737155	0	0	0	0.079	IL8RA	interleukin 8 receptor, alpha	Nonsynon	0.86		1	6	3.37	0	0	0	1	0	0	0	0	1	0	0	0	0	1	1	1	1	0	0	0	0	0	0	0	0	0	0	0	0	0	0	0	0	1	1
16858808	2	218737177	0.042	0	0	0	IL8RA	interleukin 8 receptor, alpha	Nonsynon	0.86		1	6	3.37	0	0	0	1	0	0	0	0	1	0	0	0	0	1	1	1	1	0	0	0	0	0	0	0	0	0	0	0	0	0	0	0	0	1	1
16858811	2	218738088	0.042	0	0	0.092	IL8RA	interleukin 8 receptor, alpha	Nonsynon	0.86		1	6	3.37	0	0	0	1	0	0	0	0	1	0	0	0	0	1	1	1	1	0	0	0	0	0	0	0	0	0	0	0	0	0	0	0	0	1	1
16976751	15	54175626	0	0	0	0.043	RFXDC2	regulatory factor X domain containing 2	Nonsynon	0.86		1	9	3.37	0	0	0	0	0	0	0	0	1	0	0	0	0	0	0	0	0	0	0	0	0	0	0	0	0	0	0	0	0	0	0	0	0	1	1
17838409	2	75132061	.	.	.	.	TACR1	tachykinin receptor 1	Nonsynon	0.86	Special	.	.	3.37	0	0	0	0	0	0	0	0	0	0	0	0	0	0	0	0	0	0	0	0	0	0	0	0	0	0	0	0	0	0	0	0	0	0	0
17853109	2	46840606	.	.	.	.	SOCS5	suppressor of cytokine signaling 5	Nonsynon	0.86		1	7	3.37	0	0	0	0	0	0	0	0	0	0	0	0	0	0	0	0	0	0	0	0	0	0	0	0	0	0	0	0	0	0	0	0	0	0	0
28655866	15	31917494	.	.	.	.	RYR3	ryanodine receptor 3	Nonsynon	0.86	Special	.	.	3.37	0	0	0	0	0	0	0	0	0	0	0	0	0	0	0	0	0	0	0	0	0	0	0	0	0	0	0	0	0	0	0	0	0	0	0
28934003	2	166608720	.	.	.	.	SCN1A	sodium channel, voltage-gated, type I, alpha subunit	Nonsynon	0.86	Special	.	.	3.37	0	0	0	0	0	0	0	0	0	0	0	0	0	0	0	0	0	0	0	0	0	0	0	0	0	0	0	0	0	0	0	0	0	0	0
34068428	17	53924121	.	.	.	.	MTMR4	myotubularin related protein 4	Nonsynon	0.86		1	9	3.37	0	0	0	0	0	0	0	0	0	0	0	0	0	0	0	0	0	0	0	0	0	0	0	0	0	0	0	0	0	0	0	0	0	0	0
34244542	22	38213859	.	.	.	.	MGAT3	mannosyl (beta-1,4-)-glycoprotein beta-1,4-N-acetylglucosaminyltransferase	Nonsynon	0.86		1	6	3.37	0	0	0	0	0	0	0	0	0	0	0	0	0	0	0	0	0	0	0	0	0	0	0	0	0	0	0	0	0	0	0	0	0	0	0
34262468	1	163082490	.	.	.	.	PBX1	pre-B-cell leukemia homeobox 1	Nonsynon	0.86		1	10	3.37	0	0	0	0	0	0	0	0	0	0	0	0	0	0	0	0	0	0	0	0	0	0	0	0	0	0	0	0	0	0	0	0	0	0	0
34326317	5	150481941	.	.	.	.	ANXA6	annexin A6	Nonsynon	0.86		1	7	3.37	0	0	0	0	0	0	0	0	0	0	0	0	0	0	0	0	0	0	0	0	0	0	0	0	0	0	0	0	0	0	0	0	0	0	0
34826215	1	206457106	.	.	.	.	PLXNA2	plexin A2	Nonsynon	0.86		1	8	3.37	0	0	0	0	0	0	0	0	0	0	0	0	0	0	0	0	0	0	0	0	0	0	0	0	0	0	0	0	0	0	0	0	0	0	0
34928181	2	191232383	.	.	.	.	NAB1	NGFI-A binding protein 1 (EGR1 binding protein 1)	Nonsynon	0.86		1	8	3.37	0	0	0	0	0	0	0	0	0	0	0	0	0	0	0	0	0	0	0	0	0	0	0	0	0	0	0	0	0	0	0	0	0	0	0
35177815	17	54412815	.	.	.	.	PPM1E	protein phosphatase 1E (PP2C domain containing)	Nonsynon	0.86		1	7	3.37	0	0	0	0	0	0	0	0	0	0	0	0	0	0	0	0	0	0	0	0	0	0	0	0	0	0	0	0	0	0	0	0	0	0	0
35331470	2	220131037	.	.	.	.	OBSL1	obscurin-like 1	Nonsynon	0.86		1	11	3.37	0	0	0	0	0	0	0	0	0	0	0	0	0	0	0	0	0	0	0	0	0	0	0	0	0	0	0	0	0	0	0	0	0	0	0
35345418	5	78609534	.	.	.	.	JMY	-	Nonsynon	0.86		1	6	3.37	0	0	0	0	0	0	0	0	0	0	0	0	0	0	0	0	0	0	0	0	0	0	0	0	0	0	0	0	0	0	0	0	0	0	0
35365412	19	10791715	.	.	.	.	DNM2	dynamin 2	Synon	0.86	Special	0	3	3.37	0	0	0	0	0	0	0	0	0	0	0	0	0	0	0	0	0	0	0	0	0	0	0	0	0	0	0	0	0	0	0	0	0	0	0
35417198	1	29058345	.	.	.	.	OPRD1	opioid receptor, delta 1	Nonsynon	0.86	The Opioid System	.	.	3.37	0	0	0	0	0	0	0	0	0	0	0	0	0	0	0	0	0	0	0	0	0	0	0	0	0	0	0	0	0	0	0	0	0	0	0
35456108	6	101067473	.	.	.	.	ASCC3	activating signal cointegrator 1 complex subunit 3	Nonsynon	0.86		1	6	3.37	0	0	0	0	0	0	0	0	0	0	0	0	0	0	0	0	0	0	0	0	0	0	0	0	0	0	0	0	0	0	0	0	0	0	0
35492072	6	163904474	.	.	.	.	QKI	quaking homolog, KH domain RNA binding (mouse)	Nonsynon	0.86		1	7	3.37	0	0	0	0	0	0	0	0	0	0	0	0	0	0	0	0	0	0	0	0	0	0	0	0	0	0	0	0	0	0	0	0	0	0	0
35574844	1	206457094	.	.	.	.	PLXNA2	plexin A2	Nonsynon	0.86		1	8	3.37	0	0	0	0	0	0	0	0	0	0	0	0	0	0	0	0	0	0	0	0	0	0	0	0	0	0	0	0	0	0	0	0	0	0	0
35637222	15	54174968	.	.	.	.	RFXDC2	regulatory factor X domain containing 2	Nonsynon	0.86		1	9	3.37	0	0	0	0	0	0	0	0	0	0	0	0	0	0	0	0	0	0	0	0	0	0	0	0	0	0	0	0	0	0	0	0	0	0	0
35666765	10	104406547	.	.	.	.	TRIM8	tripartite motif-containing 8	Nonsynon	0.86		1	6	3.37	0	0	0	0	0	0	0	0	0	0	0	0	0	0	0	0	0	0	0	0	0	0	0	0	0	0	0	0	0	0	0	0	0	0	0
35695411	15	58590739	.	.	.	.	RORA	RAR-related orphan receptor A	Nonsynon	0.86		1	6	3.37	0	0	0	0	0	0	0	0	0	0	0	0	0	0	0	0	0	0	0	0	0	0	0	0	0	0	0	0	0	0	0	0	0	0	0
36043370	6	101067342	.	.	.	.	ASCC3	activating signal cointegrator 1 complex subunit 3	Nonsynon	0.86		1	6	3.37	0	0	0	0	0	0	0	0	0	0	0	0	0	0	0	0	0	0	0	0	0	0	0	0	0	0	0	0	0	0	0	0	0	0	0
3180334	23	101800036	.	.	.	.	GPRASP1	G protein-coupled receptor associated sorting protein 1	mRNA-UTR	0.95	Special	0	4	3.37	0	0	0	0	0	0	0	0	0	0	0	0	0	0	0	0	0	0	0	0	0	0	0	0	0	0	0	0	0	0	0	0	0	0	0
3209234	23	101800036	.	.	.	.	GPRASP1	G protein-coupled receptor associated sorting protein 1	mRNA-UTR	0.95	Special	0	4	3.37	0	0	0	0	0	0	0	0	0	0	0	0	0	0	0	0	0	0	0	0	0	0	0	0	0	0	0	0	0	0	0	0	0	0	0
698	4	100479812	.	.	.	.	ADH1C	alcohol dehydrogenase 1C (class I), gamma polypeptide	Nonsynon	0.85	The Alcohol System	.	.	3.36	0	1	0	0	0	0	0	0	0	0	0	0	0	0	0	0	0	0	0	0	0	0	0	0	0	0	0	0	0	0	0	0	0	0	0
6282	4	9393014	0	0	0	0	DRD5	dopamine receptor D5	Nonsynon	0.85	The Dopamine System	.	.	3.36	1	0	0	0	0	0	0	0	1	0	0	0	0	0	0	0	0	0	0	0	0	0	0	0	0	0	0	0	0	0	0	0	0	1	1
10657	23	120010633	.	.	.	.	GLUD2	glutamate dehydrogenase 2	Nonsynon	0.85	The Glutamatergic System	.	.	3.36	0	0	0	0	0	0	0	0	0	0	0	0	0	0	0	0	0	0	0	0	0	0	0	0	0	0	0	0	0	0	0	0	0	0	0
309472	1	23092080	.	.	.	.	EPHB2	EPH receptor B2	Synon	0.85	Special	0	3	3.36	0	0	0	0	0	0	0	0	0	0	0	0	0	0	0	0	0	0	0	0	0	0	0	0	0	0	0	0	0	0	0	0	0	0	0
452752	6	34208747	0	0	0.011	0	GRM4	glutamate receptor, metabotropic 4	Nonsynon	0.85	The Glutamatergic System	.	.	3.36	0	0	0	0	0	0	0	0	1	0	0	0	0	0	0	0	0	0	0	0	0	0	0	0	0	0	0	0	0	0	0	0	0	1	1
1050576	6	36171768	.	.	.	.	MAPK14	mitogen-activated protein kinase 14	Synon	0.85	Goldman Gene	0	3	3.36	0	0	0	0	0	0	0	0	0	0	0	0	0	0	0	0	0	0	0	0	0	0	0	0	0	0	0	0	0	0	0	0	0	0	0
1126498	8	141781886	.	.	.	.	PTK2	PTK2 protein tyrosine kinase 2	Nonsynon	0.85		1	9	3.36	0	0	0	0	0	0	0	0	0	0	0	0	0	0	0	0	0	0	0	0	0	0	0	0	0	0	0	0	0	0	0	0	0	0	0
1131121	23	120010745	.	.	.	.	GLUD2	glutamate dehydrogenase 2	Nonsynon	0.85	The Glutamatergic System	.	.	3.36	0	0	0	0	0	0	0	0	0	0	0	0	0	0	0	0	0	0	0	0	0	0	0	0	0	0	0	0	0	0	0	0	0	0	0
1131210	6	36171767	.	.	.	.	MAPK14	mitogen-activated protein kinase 14	Synon	0.85	Goldman Gene	0	3	3.36	0	0	0	0	0	0	0	0	0	0	0	0	0	0	0	0	0	0	0	0	0	0	0	0	0	0	0	0	0	0	0	0	0	0	0
1143143	19	47201928	.	.	.	.	GRIK5	glutamate receptor, ionotropic, kainate 5	Nonsynon	0.85	The Glutamatergic System	.	.	3.36	0	0	0	0	0	0	0	0	0	0	0	0	0	0	0	0	0	0	0	0	0	0	0	0	0	0	0	0	0	0	0	0	0	0	0
1427916	5	87552275	0	0	0	0	MGC33214	transmembrane protein 161B	Nonsynon	0.85		1	8	3.36	0	0	0	0	0	0	0	0	1	0	0	0	0	0	0	0	0	0	0	0	0	0	0	0	0	0	0	0	0	0	0	0	0	1	1
1800762	4	9393740	.	.	.	.	DRD5	dopamine receptor D5	Nonsynon	0.85	The Dopamine System	.	.	3.36	1	0	0	0	0	0	0	0	0	0	0	0	0	0	0	0	0	0	0	0	0	0	0	0	0	0	0	0	0	0	0	0	0	0	0
1805035	17	33135161	.	.	.	.	TCF2	HNF1 homeobox B	Nonsynon	0.85		1	8	3.36	0	0	0	0	0	0	0	0	0	0	0	0	0	0	0	0	0	0	0	0	0	0	0	0	0	0	0	0	0	0	0	0	0	0	0
1869780	1	22095042	0	0	0.024	0	HSPG2	heparan sulfate proteoglycan 2	Nonsynon	0.85		1	6	3.36	0	0	0	1	0	0	0	0	0	0	0	0	0	1	1	1	1	0	0	0	0	0	0	0	0	0	0	0	0	0	0	0	0	0	0
1990236	17	11806187	0.192	0.144	0.148	0.11	DNAH9	dynein, axonemal, heavy chain 9	Nonsynon	0.85		1	7	3.36	0	0	0	1	1	1	1	1	1	1	1	1	0	1	1	1	1	1	1	1	1	1	1	1	1	1	1	1	1	1	1	1	1	1	1
2134185	5	11026774	0	0	0	0	CTNND2	catenin (cadherin-associated protein), delta 2 (neural plakophilin-related arm-repeat protein)	Nonsynon	0.85		1	6	3.36	0	0	0	0	0	0	0	0	0	0	0	0	0	0	0	0	0	0	0	0	0	0	0	0	0	0	0	0	0	0	0	0	0	0	0
2180314	6	52725690	0.43	0.3	0.375	0.229	GSTA2	glutathione S-transferase A2	Nonsynon	0.85	Special	.	.	3.36	0	0	0	0	0	0	1	0	1	0	1	1	0	0	1	1	0	0	1	1	0	0	1	1	0	1	1	1	1	0	1	1	0	1	1
2227840	4	9392936	.	.	.	.	DRD5	dopamine receptor D5	Nonsynon	0.85	The Dopamine System	.	.	3.36	1	0	0	0	0	0	0	0	0	0	0	0	0	0	0	0	0	0	0	0	0	0	0	0	0	0	0	0	0	0	0	0	0	0	0
2227842	4	9393557	.	.	.	.	DRD5	dopamine receptor D5	Nonsynon	0.85	The Dopamine System	.	.	3.36	1	0	0	0	0	0	0	0	0	0	0	0	0	0	0	0	0	0	0	0	0	0	0	0	0	0	0	0	0	0	0	0	0	0	0
2227843	4	9393449	0	0	0	0	DRD5	dopamine receptor D5	Nonsynon	0.85	The Dopamine System	.	.	3.36	1	0	0	0	0	0	0	0	0	0	0	0	0	0	0	0	0	0	0	0	0	0	0	0	0	0	0	0	0	0	0	0	0	0	0
2227845	4	9393370	.	.	.	.	DRD5	dopamine receptor D5	Nonsynon	0.85	The Dopamine System	.	.	3.36	1	1	0	0	0	0	0	0	0	0	0	0	0	0	0	0	0	0	0	0	0	0	0	0	0	0	0	0	0	0	0	0	0	0	0
2227847	4	9393491	.	.	.	.	DRD5	dopamine receptor D5	Nonsynon	0.85	The Dopamine System	.	.	3.36	1	0	0	0	0	0	0	0	0	0	0	0	0	0	0	0	0	0	0	0	0	0	0	0	0	0	0	0	0	0	0	0	0	0	0
2227849	4	9393080	.	.	.	.	DRD5	dopamine receptor D5	Nonsynon	0.85	The Dopamine System	.	.	3.36	1	0	0	0	0	0	0	0	0	0	0	0	0	0	0	0	0	0	0	0	0	0	0	0	0	0	0	0	0	0	0	0	0	0	0
2227850	4	9393608	0	0	0	0	DRD5	dopamine receptor D5	Nonsynon	0.85	The Dopamine System	.	.	3.36	1	0	0	0	0	0	0	0	0	0	0	0	0	0	0	0	0	0	0	0	0	0	0	0	0	0	0	0	0	0	0	0	0	0	0
2227851	4	9393640	.	.	.	.	DRD5	dopamine receptor D5	Nonsynon	0.85	The Dopamine System	.	.	3.36	0	0	0	0	0	0	0	0	0	0	0	0	0	0	0	0	0	0	0	0	0	0	0	0	0	0	0	0	0	0	0	0	0	0	0
2227852	4	9393463	0.008	0	0	0	DRD5	dopamine receptor D5	Nonsynon	0.85	The Dopamine System	.	.	3.36	1	1	0	0	0	0	0	0	0	0	0	0	0	0	0	0	0	0	0	0	0	0	0	0	0	0	0	0	0	0	0	0	0	0	0
2227885	6	121810777	.	.	.	.	GJA1	gap junction protein, alpha 1, 43kDa	Nonsynon	0.85		1	7	3.36	0	0	0	0	0	0	0	0	0	0	0	0	0	0	0	0	0	0	0	0	0	0	0	0	0	0	0	0	0	0	0	0	0	0	0
2227887	6	121810407	.	.	.	.	GJA1	gap junction protein, alpha 1, 43kDa	Nonsynon	0.85		1	7	3.36	0	0	0	0	0	0	0	0	0	0	0	0	0	0	0	0	0	0	0	0	0	0	0	0	0	0	0	0	0	0	0	0	0	0	0
2228960	6	121810135	.	.	.	.	GJA1	gap junction protein, alpha 1, 43kDa	Nonsynon	0.85		1	7	3.36	0	0	0	0	0	0	0	0	0	0	0	0	0	0	0	0	0	0	0	0	0	0	0	0	0	0	0	0	0	0	0	0	0	0	0
2228961	6	121810194	0	0	0	0	GJA1	gap junction protein, alpha 1, 43kDa	Nonsynon	0.85		1	7	3.36	0	0	0	0	0	0	0	0	0	0	0	0	0	0	0	0	0	0	0	0	0	0	0	0	0	0	0	0	0	0	0	0	0	0	0
2228962	6	121810245	.	.	.	.	GJA1	gap junction protein, alpha 1, 43kDa	Nonsynon	0.85		1	7	3.36	0	0	0	0	0	0	0	0	0	0	0	0	0	0	0	0	0	0	0	0	0	0	0	0	0	0	0	0	0	0	0	0	0	0	0
2228964	6	121810296	.	.	.	.	GJA1	gap junction protein, alpha 1, 43kDa	Nonsynon	0.85		1	7	3.36	0	0	0	0	0	0	0	0	0	0	0	0	0	0	0	0	0	0	0	0	0	0	0	0	0	0	0	0	0	0	0	0	0	0	0
2228965	6	121810303	.	.	.	.	GJA1	gap junction protein, alpha 1, 43kDa	Nonsynon	0.85		1	7	3.36	0	0	0	0	0	0	0	0	0	0	0	0	0	0	0	0	0	0	0	0	0	0	0	0	0	0	0	0	0	0	0	0	0	0	0
2228974	6	121810540	.	.	.	.	GJA1	gap junction protein, alpha 1, 43kDa	Nonsynon	0.85		1	7	3.36	0	0	0	0	0	0	0	0	0	0	0	0	0	0	0	0	0	0	0	0	0	0	0	0	0	0	0	0	0	0	0	0	0	0	0
2229006	20	47423657	.	.	.	.	KCNB1	potassium voltage-gated channel, Shab-related subfamily, member 1	Nonsynon	0.85	Special	.	.	3.36	0	0	0	0	0	0	0	0	0	0	0	0	0	0	0	0	0	0	0	0	0	0	0	0	0	0	0	0	0	0	0	0	0	0	0
2231542	11	3645191	.	.	.	.	CHRNA10	cholinergic receptor, nicotinic, alpha 10	Nonsynon	0.85	The Nicotine System	.	.	3.36	0	0	0	0	0	0	0	0	0	0	0	0	0	0	0	0	0	0	0	0	0	0	0	0	0	0	0	0	0	0	0	0	0	0	0
2231543	11	3645169	.	.	.	.	CHRNA10	cholinergic receptor, nicotinic, alpha 10	Nonsynon	0.85	The Nicotine System	.	.	3.36	0	0	0	0	0	0	0	0	0	0	0	0	0	0	0	0	0	0	0	0	0	0	0	0	0	0	0	0	0	0	0	0	0	0	0
2234951	6	52725697	0.043	0.039	0.014	0	GSTA2	glutathione S-transferase A2	Nonsynon	0.85	Special	.	.	3.36	0	0	0	0	0	0	1	0	1	0	0	0	0	0	0	0	0	0	0	0	0	0	0	0	0	1	1	1	1	0	0	0	0	1	1
2235076	6	102622953	0.075	0	0	0	GRIK2	glutamate receptor, ionotropic, kainate 2	Nonsynon	0.85	The Glutamatergic System	.	.	3.36	0	0	0	1	1	1	1	1	1	0	0	0	0	1	1	1	1	1	1	1	1	1	1	1	1	1	1	1	1	1	1	1	1	1	1
2266691	5	86739661	0	0	0	0.076	CCNH	cyclin H	Nonsynon	0.85		1	6	3.36	0	0	0	0	0	0	0	0	1	0	0	0	0	0	0	0	0	0	0	0	0	0	0	0	0	0	0	0	1	0	0	0	0	1	1
2314668	19	18510167	.	.	.	.	FKBP8	FK506 binding protein 8, 38kDa	Nonsynon	0.85		1	7	3.36	0	0	0	0	0	0	0	0	0	0	0	0	0	0	0	0	0	0	0	0	0	0	0	0	0	0	0	0	0	0	0	0	0	0	0
3192023	10	78502923	.	.	.	.	KCNMA1	potassium large conductance calcium-activated channel, subfamily M, alpha member 1	Nonsynon	0.85	Special	.	.	3.36	0	0	0	0	0	0	0	0	0	0	0	0	0	0	0	0	0	0	0	0	0	0	0	0	0	0	0	0	0	0	0	0	0	0	0
3745274	19	46204681	0.25	0.156	0.256	.	CYP2B6	cytochrome P450, family 2, subfamily B, polypeptide 6	Nonsynon	0.85	The Nicotine Metabolism System	.	.	3.36	1	0	0	1	0	0	1	0	1	1	1	1	0	1	1	1	1	1	0	0	0	1	1	1	0	1	1	1	1	1	1	1	0	1	1
3745312	19	54654746	0	0	0	0	ALDH16A1	aldehyde dehydrogenase 16 family, member A1	Nonsynon	0.85	The Alcohol System	.	.	3.36	0	0	0	0	0	0	0	0	1	0	0	0	0	0	0	0	0	0	0	0	0	0	0	0	0	0	0	0	0	0	0	0	0	1	1
3826711	19	46204664	.	.	.	.	CYP2B6	cytochrome P450, family 2, subfamily B, polypeptide 6	Nonsynon	0.85	The Nicotine Metabolism System	.	.	3.36	1	0	0	0	0	0	0	0	0	0	0	0	0	0	0	0	0	0	0	0	0	0	0	0	0	0	0	0	0	0	0	0	0	0	0
4646826	11	67187776	.	.	.	.	ALDH3B2	aldehyde dehydrogenase 3 family, member B2	Nonsynon	0.85	The Alcohol System	.	.	3.36	0	0	0	0	0	0	0	0	0	0	0	0	0	0	0	0	0	0	0	0	0	0	0	0	0	0	0	0	0	0	0	0	0	0	0
4780144	15	31741944	0.067	0.111	0.023	0.383	RYR3	ryanodine receptor 3	Nonsynon	0.85	Special	.	.	3.36	0	0	1	1	1	1	1	1	1	1	1	1	1	1	1	1	1	1	1	1	1	1	1	1	1	1	1	1	1	1	1	1	1	1	1
5956583	23	122862192	0.378	0.074	0.075	0.483	BIRC4	baculoviral IAP repeat-containing 4	Nonsynon	0.85		1	6	3.36	0	0	0	0	0	0	0	0	0	1	1	1	1	1	1	1	1	1	1	1	1	1	1	1	1	1	1	1	1	1	1	1	1	1	1
6436155	2	220113565	0.017	0.111	0.034	0.034	CHPF	-	Nonsynon	0.85		1	7	3.36	0	0	0	0	0	1	1	1	1	0	1	0	0	0	1	0	0	0	0	0	0	1	1	1	1	1	1	1	1	1	1	1	1	1	1
6722853	2	220112963	.	.	.	.	CHPF	-	Nonsynon	0.85		1	7	3.36	0	0	0	0	0	0	0	0	0	0	0	0	0	0	0	0	0	0	0	0	0	0	0	0	0	0	0	0	0	0	0	0	0	0	0
9498146	6	149110320	.	.	.	.	UST	uronyl-2-sulfotransferase	Nonsynon	0.85		1	11	3.36	0	0	0	0	0	0	0	0	0	0	0	0	0	0	0	0	0	0	0	0	0	0	0	0	0	0	0	0	0	0	0	0	0	0	0
9633939	11	113299211	0	0	0	0	HTR3B	5-hydroxytryptamine (serotonin) receptor 3B	Intron	0.85	The Serotonergic System	1	7	3.36	0	0	0	0	0	0	0	0	0	0	0	0	0	0	0	0	0	0	0	0	0	0	0	0	0	0	0	0	0	0	0	0	0	0	0
9697983	23	120010711	0.022	0	0	0.056	GLUD2	glutamate dehydrogenase 2	Nonsynon	0.85	The Glutamatergic System	.	.	3.36	0	0	0	1	0	0	0	1	1	0	0	0	0	1	1	1	1	0	0	0	0	0	0	0	0	0	0	0	0	1	1	1	1	1	1
10897167	11	61048498	0.026	0	0	0.441	SYT7	synaptotagmin VII	Synon	0.85	Special	0	3	3.36	0	0	0	0	0	0	0	0	1	0	0	0	1	0	0	0	1	0	0	0	0	0	0	0	0	0	0	0	0	0	0	0	0	1	1
11542597	16	69103768	0	0.011	0	0	COG4	component of oligomeric golgi complex 4	Nonsynon	0.85		1	6	3.36	0	0	0	0	0	0	0	0	0	0	0	0	0	0	0	0	0	0	0	0	0	0	0	0	0	0	0	0	0	0	0	0	0	0	0
11556306	2	220113317	.	.	.	.	CHPF	-	Nonsynon	0.85		1	7	3.36	0	0	0	0	0	0	0	0	0	0	0	0	0	0	0	0	0	0	0	0	0	0	0	0	0	0	0	0	0	0	0	0	0	0	0
11556307	2	220112968	.	.	.	.	CHPF	-	Nonsynon	0.85		1	7	3.36	0	0	0	0	0	0	0	0	0	0	0	0	0	0	0	0	0	0	0	0	0	0	0	0	0	0	0	0	0	0	0	0	0	0	0
11556310	2	220112401	.	.	.	.	CHPF	-	Nonsynon	0.85		1	7	3.36	0	0	0	0	0	0	0	0	0	0	0	0	0	0	0	0	0	0	0	0	0	0	0	0	0	0	0	0	0	0	0	0	0	0	0
11571541	1	210855099	0	0	0	0	ATF3	activating transcription factor 3	Nonsynon	0.85	Special	.	.	3.36	0	0	0	0	0	0	0	0	1	0	0	0	0	0	0	0	0	0	0	0	0	0	0	0	0	0	0	0	0	0	0	0	0	1	1
16864310	1	169516589	0	0	0	0	FMO1	flavin containing monooxygenase 1	Nonsynon	0.85	The Nicotine Metabolism System	.	.	3.36	1	0	0	0	0	0	1	0	1	0	0	0	0	0	0	0	0	0	0	0	0	0	0	0	0	1	1	1	1	0	0	0	0	1	1
16938507	8	74012114	0	0	0	0.051	KCNB2	potassium voltage-gated channel, Shab-related subfamily, member 2	Nonsynon	0.85	Special	.	.	3.36	0	0	0	0	0	0	0	0	1	0	0	0	0	0	0	0	0	0	0	0	0	0	0	0	0	0	0	0	0	0	0	0	0	1	1
17062054	13	40827296	0	0	0	0.275	NARG1L	NMDA receptor regulated 1-like	Nonsynon	0.85	Special	.	.	3.36	0	0	0	0	0	1	1	1	1	0	0	0	1	0	0	0	1	0	0	0	0	1	1	1	1	1	1	1	1	1	1	1	1	1	1
17078874	5	178342533	0.069	0	0	0.034	GRM6	glutamate receptor, metabotropic 6	Nonsynon	0.85	The Glutamatergic System	.	.	3.36	0	0	0	0	0	0	0	0	0	0	0	0	0	0	0	0	0	0	0	0	0	0	0	0	0	0	0	0	0	0	0	0	0	0	0
17078877	5	178342819	0.026	0.136	0.163	0	GRM6	glutamate receptor, metabotropic 6	Nonsynon	0.85	The Glutamatergic System	.	.	3.36	0	0	0	0	0	0	0	0	1	0	1	1	0	0	1	1	0	0	0	0	0	0	1	1	0	0	1	1	0	0	1	1	0	1	1
17161026	7	86306190	0	0	0	0	GRM3	glutamate receptor, metabotropic 3	Nonsynon	0.85	The Glutamatergic System	.	.	3.36	0	0	0	0	0	0	0	0	1	0	0	0	0	0	0	0	0	0	0	0	0	0	0	0	0	0	0	0	0	0	0	0	0	1	1
17653265	6	121810450	.	.	.	.	GJA1	gap junction protein, alpha 1, 43kDa	Nonsynon	0.85		1	7	3.36	0	0	0	0	0	0	0	0	0	0	0	0	0	0	0	0	0	0	0	0	0	0	0	0	0	0	0	0	0	0	0	0	0	0	0
17852048	7	86306102	.	.	.	.	GRM3	glutamate receptor, metabotropic 3	Nonsynon	0.85	The Glutamatergic System	.	.	3.36	0	0	0	0	0	0	0	0	0	0	0	0	0	0	0	0	0	0	0	0	0	0	0	0	0	0	0	0	0	0	0	0	0	0	0
17852278	14	64613021	.	.	.	.	MAX	MYC associated factor X	Nonsynon	0.85		1	6	3.36	0	0	0	0	0	0	0	0	0	0	0	0	0	0	0	0	0	0	0	0	0	0	0	0	0	0	0	0	0	0	0	0	0	0	0
17856664	7	86306300	.	.	.	.	GRM3	glutamate receptor, metabotropic 3	Nonsynon	0.85	The Glutamatergic System	.	.	3.36	0	0	0	0	0	0	0	0	0	0	0	0	0	0	0	0	0	0	0	0	0	0	0	0	0	0	0	0	0	0	0	0	0	0	0
28360412	1	169516601	.	.	.	.	FMO1	flavin containing monooxygenase 1	Nonsynon	0.85	The Nicotine Metabolism System	.	.	3.36	1	0	0	0	0	0	0	0	0	0	0	0	0	0	0	0	0	0	0	0	0	0	0	0	0	0	0	0	0	0	0	0	0	0	0
28928873	23	120010039	.	.	.	.	GLUD2	glutamate dehydrogenase 2	Nonsynon	0.85	The Glutamatergic System	.	.	3.36	0	0	0	0	0	0	0	0	0	0	0	0	0	0	0	0	0	0	0	0	0	0	0	0	0	0	0	0	0	0	0	0	0	0	0
28931600	6	121810119	.	.	.	.	GJA1	gap junction protein, alpha 1, 43kDa	Nonsynon	0.85		1	7	3.36	0	0	0	0	0	0	0	0	0	0	0	0	0	0	0	0	0	0	0	0	0	0	0	0	0	0	0	0	0	0	0	0	0	0	0
28931601	6	121809978	.	.	.	.	GJA1	gap junction protein, alpha 1, 43kDa	Nonsynon	0.85		1	7	3.36	0	0	0	0	0	0	0	0	0	0	0	0	0	0	0	0	0	0	0	0	0	0	0	0	0	0	0	0	0	0	0	0	0	0	0
34001856	5	11399632	.	.	.	.	CTNND2	catenin (cadherin-associated protein), delta 2 (neural plakophilin-related arm-repeat protein)	Nonsynon	0.85		1	6	3.36	0	0	0	0	0	0	0	0	0	0	0	0	0	0	0	0	0	0	0	0	0	0	0	0	0	0	0	0	0	0	0	0	0	0	0
34273063	1	23092083	.	.	.	.	EPHB2	EPH receptor B2	Synon	0.85	Special	0	3	3.36	0	0	0	0	0	0	0	0	0	0	0	0	0	0	0	0	0	0	0	0	0	0	0	0	0	0	0	0	0	0	0	0	0	0	0
34280195	20	47422934	.	.	.	.	KCNB1	potassium voltage-gated channel, Shab-related subfamily, member 1	Nonsynon	0.85	Special	.	.	3.36	0	0	0	0	0	0	0	0	0	0	0	0	0	0	0	0	0	0	0	0	0	0	0	0	0	0	0	0	0	0	0	0	0	0	0
34289080	8	74012097	.	.	.	.	KCNB2	potassium voltage-gated channel, Shab-related subfamily, member 2	Nonsynon	0.85	Special	.	.	3.36	0	0	0	0	0	0	0	0	0	0	0	0	0	0	0	0	0	0	0	0	0	0	0	0	0	0	0	0	0	0	0	0	0	0	0
34340372	17	11806275	.	.	.	.	DNAH9	dynein, axonemal, heavy chain 9	Nonsynon	0.85		1	7	3.36	0	0	0	0	0	0	0	0	0	0	0	0	0	0	0	0	0	0	0	0	0	0	0	0	0	0	0	0	0	0	0	0	0	0	0
34346384	12	119134552	.	.	.	.	PXN	paxillin	Nonsynon	0.85		1	6	3.36	0	0	0	0	0	0	0	0	0	0	0	0	0	0	0	0	0	0	0	0	0	0	0	0	0	0	0	0	0	0	0	0	0	0	0
34467662	20	47423031	.	.	.	.	KCNB1	potassium voltage-gated channel, Shab-related subfamily, member 1	Nonsynon	0.85	Special	.	.	3.36	0	0	0	0	0	0	0	0	0	0	0	0	0	0	0	0	0	0	0	0	0	0	0	0	0	0	0	0	0	0	0	0	0	0	0
34497371	9	128910234	.	.	.	.	ANGPTL2	angiopoietin-like 2	Nonsynon	0.85		1	7	3.36	0	0	0	0	0	0	0	0	0	0	0	0	0	0	0	0	0	0	0	0	0	0	0	0	0	0	0	0	0	0	0	0	0	0	0
34524733	22	38366969	.	.	.	.	CACNA1I	calcium channel, voltage-dependent, T type, alpha 1I subunit	Nonsynon	0.85	Special	.	.	3.36	0	0	0	0	0	0	0	0	0	0	0	0	0	0	0	0	0	0	0	0	0	0	0	0	0	0	0	0	0	0	0	0	0	0	0
34591577	1	200965655	.	.	.	.	JARID1B	jumonji, AT rich interactive domain 1B	Nonsynon	0.85		1	7	3.36	0	0	0	0	0	0	0	0	0	0	0	0	0	0	0	0	0	0	0	0	0	0	0	0	0	0	0	0	0	0	0	0	0	0	0
34601464	2	220120737	.	.	.	.	MGC99813	transmembrane protein 198	Nonsynon	0.85		1	9	3.36	0	0	0	0	0	0	0	0	0	0	0	0	0	0	0	0	0	0	0	0	0	0	0	0	0	0	0	0	0	0	0	0	0	0	0
34789715	11	63155480	.	.	.	.	DKFZP564J0863	-	Nonsynon	0.85		1	8	3.36	0	0	0	0	0	0	0	0	0	0	0	0	0	0	0	0	0	0	0	0	0	0	0	0	0	0	0	0	0	0	0	0	0	0	0
34911784	10	73230479	.	.	.	.	CDH23	cadherin-like 23	Nonsynon	0.85		1	8	3.36	0	0	0	0	0	0	0	0	0	0	0	0	0	0	0	0	0	0	0	0	0	0	0	0	0	0	0	0	0	0	0	0	0	0	0
34920368	20	47422968	.	.	.	.	KCNB1	potassium voltage-gated channel, Shab-related subfamily, member 1	Nonsynon	0.85	Special	.	.	3.36	0	0	0	0	0	0	0	0	0	0	0	0	0	0	0	0	0	0	0	0	0	0	0	0	0	0	0	0	0	0	0	0	0	0	0
34966371	2	165741039	.	.	.	.	SCN3A	sodium channel, voltage-gated, type III, alpha subunit	Nonsynon	0.85	Special	.	.	3.36	0	0	0	0	0	0	0	0	0	0	0	0	0	0	0	0	0	0	0	0	0	0	0	0	0	0	0	0	0	0	0	0	0	0	0
34973265	16	1196213	.	.	.	.	CACNA1H	calcium channel, voltage-dependent, T type, alpha 1H subunit	Nonsynon	0.85	Special	.	.	3.36	0	0	0	0	0	0	0	0	0	0	0	0	0	0	0	0	0	0	0	0	0	0	0	0	0	0	0	0	0	0	0	0	0	0	0
35163091	2	220113604	.	.	.	.	CHPF	-	Nonsynon	0.85		1	7	3.36	0	0	0	0	0	0	0	0	0	0	0	0	0	0	0	0	0	0	0	0	0	0	0	0	0	0	0	0	0	0	0	0	0	0	0
35292336	12	121780711	.	.	.	.	GPR81	G protein-coupled receptor 81	Nonsynon	0.85	The Nicotine System	.	.	3.36	0	0	0	0	0	0	0	0	0	0	0	0	0	0	0	0	0	0	0	0	0	0	0	0	0	0	0	0	0	0	0	0	0	0	0
35414494	8	74011580	.	.	.	.	KCNB2	potassium voltage-gated channel, Shab-related subfamily, member 2	Nonsynon	0.85	Special	.	.	3.36	0	0	0	0	0	0	0	0	0	0	0	0	0	0	0	0	0	0	0	0	0	0	0	0	0	0	0	0	0	0	0	0	0	0	0
35613000	10	91394396	.	.	.	.	PANK1	pantothenate kinase 1	Nonsynon	0.85		1	6	3.36	0	0	0	0	0	0	0	0	0	0	0	0	0	0	0	0	0	0	0	0	0	0	0	0	0	0	0	0	0	0	0	0	0	0	0
35658494	19	53599895	.	.	.	.	GRIN2D	glutamate receptor, ionotropic, N-methyl D-aspartate 2D	Nonsynon	0.85	The Glutamatergic System	.	.	3.36	0	0	0	0	0	0	0	0	0	0	0	0	0	0	0	0	0	0	0	0	0	0	0	0	0	0	0	0	0	0	0	0	0	0	0
35719513	4	100479806	.	.	.	.	ADH1C	alcohol dehydrogenase 1C (class I), gamma polypeptide	Nonsynon	0.85	The Alcohol System	.	.	3.36	0	0	0	0	0	0	0	0	0	0	0	0	0	0	0	0	0	0	0	0	0	0	0	0	0	0	0	0	0	0	0	0	0	0	0
35831424	20	47422971	.	.	.	.	KCNB1	potassium voltage-gated channel, Shab-related subfamily, member 1	Nonsynon	0.85	Special	.	.	3.36	0	0	0	0	0	0	0	0	0	0	0	0	0	0	0	0	0	0	0	0	0	0	0	0	0	0	0	0	0	0	0	0	0	0	0
35834206	1	152811113	.	.	.	.	CHRNB2	cholinergic receptor, nicotinic, beta 2 (neuronal)	Nonsynon	0.85	The Nicotine System	.	.	3.36	0	0	0	0	0	0	0	0	0	0	0	0	0	0	0	0	0	0	0	0	0	0	0	0	0	0	0	0	0	0	0	0	0	0	0
36002687	2	220116323	.	.	.	.	CHPF	-	Nonsynon	0.85		1	7	3.36	0	0	0	0	0	0	0	0	0	0	0	0	0	0	0	0	0	0	0	0	0	0	0	0	0	0	0	0	0	0	0	0	0	0	0
36013062	2	32554846	.	.	.	.	BIRC6	baculoviral IAP repeat-containing 6 (apollon)	Nonsynon	0.85		1	9	3.36	0	0	0	0	0	0	0	0	0	0	0	0	0	0	0	0	0	0	0	0	0	0	0	0	0	0	0	0	0	0	0	0	0	0	0
36056539	19	46204668	.	.	.	.	CYP2B6	cytochrome P450, family 2, subfamily B, polypeptide 6	Nonsynon	0.85	The Nicotine Metabolism System	.	.	3.36	0	0	0	0	0	0	0	0	0	0	0	0	0	0	0	0	0	0	0	0	0	0	0	0	0	0	0	0	0	0	0	0	0	0	0
36079186	19	46204758	.	.	.	.	CYP2B6	cytochrome P450, family 2, subfamily B, polypeptide 6	Nonsynon	0.85	The Nicotine Metabolism System	.	.	3.36	0	0	0	0	0	0	0	0	0	0	0	0	0	0	0	0	0	0	0	0	0	0	0	0	0	0	0	0	0	0	0	0	0	0	0
36124671	12	121780083	.	.	.	.	GPR81	G protein-coupled receptor 81	Nonsynon	0.85	The Nicotine System	.	.	3.36	0	0	0	0	0	0	0	0	0	0	0	0	0	0	0	0	0	0	0	0	0	0	0	0	0	0	0	0	0	0	0	0	0	0	0
41271137	5	72197203	.	.	.	.	TNPO1	transportin 1	Nonsynon	0.85		1	6	3.36	0	0	0	0	0	0	0	0	0	0	0	0	0	0	0	0	0	0	0	0	0	0	0	0	0	0	0	0	0	0	0	0	0	0	0
41278194	19	17961552	.	.	.	.	KCNN1	potassium intermediate/small conductance calcium-activated channel, subfamily N, member 1	Synon	0.85	Special	0	3	3.36	0	0	0	0	0	0	0	0	0	0	0	0	0	0	0	0	0	0	0	0	0	0	0	0	0	0	0	0	0	0	0	0	0	0	0
41281001	7	100328258	.	.	.	.	ACHE	acetylcholinesterase (Yt blood group)	Nonsynon	0.85	The Cholinergic System	.	.	3.36	0	0	0	0	0	0	0	0	0	0	0	0	0	0	0	0	0	0	0	0	0	0	0	0	0	0	0	0	0	0	0	0	0	0	0
41281336	10	73230504	.	.	.	.	CDH23	cadherin-like 23	Nonsynon	0.85		1	8	3.36	0	0	0	0	0	0	0	0	0	0	0	0	0	0	0	0	0	0	0	0	0	0	0	0	0	0	0	0	0	0	0	0	0	0	0
41304944	23	120010339	.	.	.	.	GLUD2	glutamate dehydrogenase 2	Nonsynon	0.85	The Glutamatergic System	.	.	3.36	0	0	0	0	0	0	0	0	0	0	0	0	0	0	0	0	0	0	0	0	0	0	0	0	0	0	0	0	0	0	0	0	0	0	0
45459594	19	46204711	.	.	.	.	CYP2B6	cytochrome P450, family 2, subfamily B, polypeptide 6	Nonsynon	0.85	The Nicotine Metabolism System	.	.	3.36	0	0	0	0	0	0	0	0	0	0	0	0	0	0	0	0	0	0	0	0	0	0	0	0	0	0	0	0	0	0	0	0	0	0	0
45459696	6	160689787	.	.	.	.	SLC22A3	solute carrier family 22 (extraneuronal monoamine transporter), member 3	Nonsynon	0.85	Special	.	.	3.36	0	0	0	0	0	0	0	0	0	0	0	0	0	0	0	0	0	0	0	0	0	0	0	0	0	0	0	0	0	0	0	0	0	0	0
45479092	11	113310885	.	.	.	.	HTR3B	5-hydroxytryptamine (serotonin) receptor 3B	Intron	0.85	The Serotonergic System	1	7	3.36	0	0	0	0	0	0	0	0	0	0	0	0	0	0	0	0	0	0	0	0	0	0	0	0	0	0	0	0	0	0	0	0	0	0	0
45490997	6	149110471	.	.	.	.	UST	uronyl-2-sulfotransferase	Nonsynon	0.85		1	11	3.36	0	0	0	0	0	0	0	0	0	0	0	0	0	0	0	0	0	0	0	0	0	0	0	0	0	0	0	0	0	0	0	0	0	0	0
45527936	11	113310861	.	.	.	.	HTR3B	5-hydroxytryptamine (serotonin) receptor 3B	Intron	0.85	The Serotonergic System	1	7	3.36	0	0	0	0	0	0	0	0	0	0	0	0	0	0	0	0	0	0	0	0	0	0	0	0	0	0	0	0	0	0	0	0	0	0	0
45569843	11	113299138	.	.	.	.	HTR3B	5-hydroxytryptamine (serotonin) receptor 3B	Intron	0.85	The Serotonergic System	1	7	3.36	0	0	0	0	0	0	0	0	0	0	0	0	0	0	0	0	0	0	0	0	0	0	0	0	0	0	0	0	0	0	0	0	0	0	0
45591234	11	113310860	.	.	.	.	HTR3B	5-hydroxytryptamine (serotonin) receptor 3B	Intron	0.85	The Serotonergic System	1	7	3.36	0	0	0	0	0	0	0	0	0	0	0	0	0	0	0	0	0	0	0	0	0	0	0	0	0	0	0	0	0	0	0	0	0	0	0
45624534	6	160689572	.	.	.	.	SLC22A3	solute carrier family 22 (extraneuronal monoamine transporter), member 3	Nonsynon	0.85	Special	.	.	3.36	0	0	0	0	0	0	0	0	0	0	0	0	0	0	0	0	0	0	0	0	0	0	0	0	0	0	0	0	0	0	0	0	0	0	0
9339	14	22151063	0.258	0.144	0.136	0.367	ABHD4	abhydrolase domain containing 4	mRNA-UTR	0.74	Special	0	5	3.36	0	0	0	0	1	1	1	1	1	0	0	0	0	0	0	1	0	1	1	1	1	1	1	1	1	1	1	1	1	1	1	1	1	1	1
13306006	4	164473165	0.017	0.024	0.034	0	NPY1R	neuropeptide Y receptor Y1	mRNA-UTR	0.74	Goldman Gene	0	5	3.36	0	0	0	0	0	0	0	0	0	0	0	0	0	0	0	0	0	0	0	0	0	0	0	0	0	0	0	0	0	0	0	0	0	0	0
17120416	14	22150790	0.009	0	0	0	ABHD4	abhydrolase domain containing 4	mRNA-UTR	0.74	Special	0	5	3.36	0	0	0	0	0	0	0	0	0	0	0	0	0	0	0	0	0	0	0	0	0	0	0	0	0	0	0	0	0	0	0	0	0	0	0
28501299	4	164473192	.	.	.	.	NPY1R	neuropeptide Y receptor Y1	mRNA-UTR	0.74	Goldman Gene	0	5	3.36	0	0	0	0	0	0	0	0	0	0	0	0	0	0	0	0	0	0	0	0	0	0	0	0	0	0	0	0	0	0	0	0	0	0	0
5522	4	149576925	0.117	0.178	0.216	0.076	NR3C2	nuclear receptor subfamily 3, group C, member 2	Nonsynon	0.84	Special	.	.	3.35	0	0	1	1	1	1	1	1	1	1	1	1	1	1	1	1	1	1	1	1	1	1	1	1	1	1	1	1	1	1	1	1	1	1	1
5523	4	149576132	0	0	0	0.017	NR3C2	nuclear receptor subfamily 3, group C, member 2	Nonsynon	0.84	Special	.	.	3.35	0	0	0	0	0	0	0	0	1	0	0	0	0	0	0	0	0	0	0	0	0	0	0	0	0	0	0	0	0	0	0	0	0	1	1
5526	4	149575853	0	0	0	0	NR3C2	nuclear receptor subfamily 3, group C, member 2	Nonsynon	0.84	Special	.	.	3.35	0	0	0	0	0	0	0	0	1	0	0	0	0	0	0	0	0	0	0	0	0	0	0	0	0	0	0	0	0	0	0	0	0	1	1
5527	4	149575802	0	0.044	0.034	0.008	NR3C2	nuclear receptor subfamily 3, group C, member 2	Nonsynon	0.84	Special	.	.	3.35	0	0	1	1	0	0	0	0	1	1	1	1	1	1	1	1	1	0	0	0	0	0	0	0	0	0	0	0	0	0	0	0	0	1	1
6308	13	46307049	0.008	0	0	0	HTR2A	5-hydroxytryptamine (serotonin) receptor 2A	Nonsynon	0.84	The Serotonergic System	.	.	3.35	1	0	0	0	0	0	0	0	1	0	0	0	0	0	0	0	0	0	0	0	0	0	0	0	0	0	0	0	0	0	0	0	0	1	1
6314	13	46307035	0.075	0	0	0.158	HTR2A	5-hydroxytryptamine (serotonin) receptor 2A	Nonsynon	0.84	The Serotonergic System	.	.	3.35	1	1	0	1	0	1	1	1	1	1	0	0	0	1	1	1	1	0	0	0	0	1	1	1	1	1	1	1	1	1	1	1	1	1	1
11550	4	22338127	0	0.011	0	0	LOC643751	-	Nonsynon	0.84		1	13	3.35	0	0	0	0	0	0	0	0	0	0	0	0	0	0	0	0	0	0	0	0	0	0	0	0	0	0	0	0	0	0	0	0	0	0	0
283413	4	100487213	0	0	0	0	ADH1C	alcohol dehydrogenase 1C (class I), gamma polypeptide	Nonsynon	0.84	The Alcohol System	.	.	3.35	0	0	0	0	0	0	0	0	1	0	0	0	0	0	0	0	0	0	0	0	0	0	0	0	0	0	0	0	0	0	0	0	0	1	1
363494	21	29855903	0	0	0	0	GRIK1	glutamate receptor, ionotropic, kainate 1	Nonsynon	0.84	The Glutamatergic System	.	.	3.35	0	0	0	0	0	0	0	0	1	0	0	0	0	0	0	0	0	0	0	0	0	0	0	0	0	0	0	0	0	0	0	0	0	1	1
762585	11	118467363	.	.	.	.	HMBS	hydroxymethylbilane synthase	Nonsynon	0.84		1	7	3.35	0	0	0	0	0	0	0	0	0	0	0	0	0	0	0	0	0	0	0	0	0	0	0	0	0	0	0	0	0	0	0	0	0	0	0
897471	1	22064041	0.302	0.1	0.102	0.331	HSPG2	heparan sulfate proteoglycan 2	Nonsynon	0.84		1	6	3.35	0	0	0	0	0	0	0	0	0	0	0	0	0	0	0	0	0	0	0	0	0	0	0	0	0	0	0	0	0	0	0	0	0	0	0
1042767	1	169570314	0	0	0	0.333	FMO4	flavin containing monooxygenase 4	Nonsynon	0.84	The Nicotine Metabolism System	.	.	3.35	0	0	0	0	0	0	1	0	1	0	0	0	0	0	0	0	0	0	0	0	0	0	0	0	0	1	1	1	1	0	0	0	0	1	1
1049515	17	44841753	.	.	.	.	PHB	prohibitin	Nonsynon	0.84		1	7	3.35	0	0	0	0	0	0	0	0	0	0	0	0	0	0	0	0	0	0	0	0	0	0	0	0	0	0	0	0	0	0	0	0	0	0	0
1051733	6	52766965	0	0	0	0	GSTA1	glutathione S-transferase A1	Nonsynon	0.84	Special	.	.	3.35	0	0	0	0	0	0	0	0	0	0	0	0	0	0	0	0	0	0	0	0	0	0	0	0	0	0	0	0	0	0	0	0	0	0	0
1051739	6	52766961	0	0	0	0	GSTA1	glutathione S-transferase A1	Nonsynon	0.84	Special	.	.	3.35	0	0	0	0	0	0	0	0	1	0	0	0	0	0	0	0	0	0	0	0	0	0	0	0	0	0	0	0	0	0	0	0	0	1	1
1051745	6	52766958	0	0	0.012	0	GSTA1	glutathione S-transferase A1	Nonsynon	0.84	Special	.	.	3.35	0	0	0	0	0	0	0	0	1	0	0	0	0	0	0	0	0	0	0	0	0	0	0	0	0	0	0	0	0	0	0	0	0	1	1
1051757	6	52766947	0.009	0	0	0	GSTA1	glutathione S-transferase A1	Nonsynon	0.84	Special	.	.	3.35	0	0	0	0	0	0	0	0	0	0	0	0	0	0	0	0	0	0	0	0	0	0	0	0	0	0	0	0	0	0	0	0	0	0	0
1051773	6	52766923	.	.	.	.	GSTA1	glutathione S-transferase A1	Nonsynon	0.84	Special	.	.	3.35	0	0	0	0	0	0	0	0	0	0	0	0	0	0	0	0	0	0	0	0	0	0	0	0	0	0	0	0	0	0	0	0	0	0	0
1051777	6	52766914	0	0	0	0	GSTA1	glutathione S-transferase A1	Nonsynon	0.84	Special	.	.	3.35	0	0	0	0	0	0	0	0	1	0	0	0	0	0	0	0	0	0	0	0	0	0	0	0	0	0	0	0	0	0	0	0	0	1	1
1051778	6	52766913	.	.	.	.	GSTA1	glutathione S-transferase A1	Nonsynon	0.84	Special	.	.	3.35	0	0	0	0	0	0	0	0	0	0	0	0	0	0	0	0	0	0	0	0	0	0	0	0	0	0	0	0	0	0	0	0	0	0	0
1053967	5	76285683	.	.	.	.	CRHBP	corticotropin releasing hormone binding protein	Synon	0.84	Special	0	3	3.35	0	0	0	0	0	0	0	0	0	0	0	0	0	0	0	0	0	0	0	0	0	0	0	0	0	0	0	0	0	0	0	0	0	0	0
1058576	13	46307127	0	0	0	0	HTR2A	5-hydroxytryptamine (serotonin) receptor 2A	Nonsynon	0.84	The Serotonergic System	.	.	3.35	0	1	0	0	0	0	0	0	1	0	0	0	0	0	0	0	0	0	0	0	0	0	0	0	0	0	0	0	0	0	0	0	0	1	1
1141356	10	35517284	.	.	.	.	CREM	cAMP responsive element modulator	Nonsynon	0.84	Special	.	.	3.35	0	0	0	0	0	0	0	0	0	0	0	0	0	0	0	0	0	0	0	0	0	0	0	0	0	0	0	0	0	0	0	0	0	0	0
1141357	10	35517296	.	.	.	.	CREM	cAMP responsive element modulator	Nonsynon	0.84	Special	.	.	3.35	0	0	0	0	0	0	0	0	0	0	0	0	0	0	0	0	0	0	0	0	0	0	0	0	0	0	0	0	0	0	0	0	0	0	0
1227065	10	73162085	0.208	0.167	0.156	0.275	CDH23	cadherin-like 23	Nonsynon	0.84		1	8	3.35	0	0	0	1	1	1	1	1	1	1	1	1	0	1	1	1	1	1	1	1	1	1	1	1	1	1	1	1	1	1	1	1	1	1	1
1803636	1	94134943	.	.	.	.	GCLM	glutamate-cysteine ligase, modifier subunit	Nonsynon	0.84	The Glutamatergic System	.	.	3.35	0	0	0	0	0	0	0	0	0	0	0	0	0	0	0	0	0	0	0	0	0	0	0	0	0	0	0	0	0	0	0	0	0	0	0
1803666	4	22338486	.	.	.	.	LOC643751	-	Nonsynon	0.84		1	13	3.35	0	0	0	0	0	0	0	0	0	0	0	0	0	0	0	0	0	0	0	0	0	0	0	0	0	0	0	0	0	0	0	0	0	0	0
1804722	5	72236938	.	.	.	.	TNPO1	transportin 1	Nonsynon	0.84		1	6	3.35	0	0	0	0	0	0	0	0	0	0	0	0	0	0	0	0	0	0	0	0	0	0	0	0	0	0	0	0	0	0	0	0	0	0	0
1805075	6	160425197	0.078	0.344	0.375	0	IGF2R	insulin-like growth factor 2 receptor	Nonsynon	0.84		1	6	3.35	0	0	0	0	0	0	0	0	1	1	1	1	0	1	1	1	0	1	0	0	0	1	1	1	0	1	1	1	0	1	1	1	0	1	1
2162986	5	89805484	0	0.067	0.023	0	LOC153364	-	Nonsynon	0.84		1	10	3.35	0	0	0	0	0	0	0	0	1	0	1	0	0	0	1	0	0	0	1	0	0	0	1	0	0	0	1	0	0	0	1	0	0	1	1
2229024	14	74817583	0	0	0	.	FOS	v-fos FBJ murine osteosarcoma viral oncogene homolog	Synon	0.84	Goldman Gene	0	3	3.35	0	0	0	0	0	0	0	0	0	0	0	0	0	0	0	0	0	0	0	0	0	0	0	0	0	0	0	0	0	0	0	0	0	0	0
2229272	19	44590361	.	.	.	.	ZFP36	zinc finger protein 36, C3H type, homolog (mouse)	Nonsynon	0.84		1	6	3.35	0	0	0	0	0	0	0	0	0	0	0	0	0	0	0	0	0	0	0	0	0	0	0	0	0	0	0	0	0	0	0	0	0	0	0
2275558	1	162795744	.	.	.	.	PBX1	pre-B-cell leukemia homeobox 1	Nonsynon	0.84		1	10	3.35	0	0	0	0	0	0	0	0	0	0	0	0	0	0	0	0	0	0	0	0	0	0	0	0	0	0	0	0	0	0	0	0	0	0	0
3737925	1	169570268	0	0	0.011	0	FMO4	flavin containing monooxygenase 4	Nonsynon	0.84	The Nicotine Metabolism System	.	.	3.35	0	0	0	0	0	0	1	0	0	0	0	0	0	0	0	0	0	0	0	0	0	0	0	0	0	1	1	1	1	0	0	0	0	0	0
3739722	9	103375503	0.11	0.3	0.214	0.192	GRIN3A	glutamate receptor, ionotropic, N-methyl-D-aspartate 3A	Nonsynon	0.84	The Glutamatergic System	.	.	3.35	0	0	0	0	1	1	1	1	1	0	0	1	0	1	1	1	1	1	1	1	1	1	1	1	1	1	1	1	1	1	1	1	1	1	1
3741252	11	61268074	.	.	.	.	C11orf11	diacylglycerol lipase, alpha	Nonsynon	0.84	Special	.	.	3.35	0	0	0	0	0	0	0	0	0	0	0	0	0	0	0	0	0	0	0	0	0	0	0	0	0	0	0	0	0	0	0	0	0	0	0
4645857	14	74817718	.	.	.	.	FOS	v-fos FBJ murine osteosarcoma viral oncogene homolog	Synon	0.84	Goldman Gene	0	3	3.35	0	0	0	0	0	0	0	0	0	0	0	0	0	0	0	0	0	0	0	0	0	0	0	0	0	0	0	0	0	0	0	0	0	0	0
4988465	17	68677133	0	0	0	0	SSTR2	somatostatin receptor 2	Nonsynon	0.84	Special	.	.	3.35	0	0	0	0	0	0	0	0	1	0	0	0	0	0	0	0	0	0	0	0	0	0	0	0	0	0	0	0	0	0	0	0	0	1	1
4999806	19	18405611	.	.	.	.	SSBP4	single stranded DNA binding protein 4	Nonsynon	0.84		1	6	3.35	0	0	0	0	0	0	0	0	0	0	0	0	0	0	0	0	0	0	0	0	0	0	0	0	0	0	0	0	0	0	0	0	0	0	0
6432225	2	11727546	.	0	0	.	NTSR2	neurotensin receptor 2	Nonsynon	0.84	Goldman Gene	.	.	3.35	0	0	0	0	0	0	0	0	0	0	0	0	0	0	0	0	0	0	0	0	0	0	0	0	0	0	0	0	0	0	0	0	0	0	0
9390698	6	101403110	0.475	0.256	0.278	0.008	ASCC3	activating signal cointegrator 1 complex subunit 3	Nonsynon	0.84		1	6	3.35	0	0	0	0	0	0	0	0	1	1	1	1	0	1	1	1	0	1	1	1	0	1	1	1	0	1	1	1	0	1	1	1	0	1	1
11039323	11	47620586	.	.	.	.	MTCH2	mitochondrial carrier homolog 2 (C. elegans)	Nonsynon	0.84		1	6	3.35	0	0	0	0	0	0	0	0	0	0	0	0	0	0	0	0	0	0	0	0	0	0	0	0	0	0	0	0	0	0	0	0	0	0	0
11416818	5	80076133	.	.	.	.	MSH3	mutS homolog 3 (E. coli)	Nonsynon	0.84		1	6	3.35	0	0	0	0	0	0	0	0	0	0	0	0	0	0	0	0	0	0	0	0	0	0	0	0	0	0	0	0	0	0	0	0	0	0	0
11433668	11	67542641	.	.	.	.	ALDH3B1	aldehyde dehydrogenase 3 family, member B1	Nonsynon	0.84	The Alcohol System	.	.	3.35	0	0	0	0	0	0	0	0	0	0	0	0	0	0	0	0	0	0	0	0	0	0	0	0	0	0	0	0	0	0	0	0	0	0	0
11441417	17	3423718	.	.	.	.	TRPV1	transient receptor potential cation channel, subfamily V, member 1	Nonsynon	0.84	Special	.	.	3.35	0	0	0	0	0	0	0	0	0	0	0	0	0	0	0	0	0	0	0	0	0	0	0	0	0	0	0	0	0	0	0	0	0	0	0
11544901	4	22338524	.	.	.	.	LOC643751	-	Nonsynon	0.84		1	13	3.35	0	0	0	0	0	0	0	0	0	0	0	0	0	0	0	0	0	0	0	0	0	0	0	0	0	0	0	0	0	0	0	0	0	0	0
11545324	10	35517170	.	.	.	.	CREM	cAMP responsive element modulator	Nonsynon	0.84	Special	.	.	3.35	0	0	0	0	0	0	0	0	0	0	0	0	0	0	0	0	0	0	0	0	0	0	0	0	0	0	0	0	0	0	0	0	0	0	0
11554007	6	101094962	.	.	.	.	ASCC3	activating signal cointegrator 1 complex subunit 3	Nonsynon	0.84		1	6	3.35	0	0	0	0	0	0	0	0	0	0	0	0	0	0	0	0	0	0	0	0	0	0	0	0	0	0	0	0	0	0	0	0	0	0	0
11556848	2	11727205	.	.	.	.	NTSR2	neurotensin receptor 2	Nonsynon	0.84	Goldman Gene	.	.	3.35	0	0	0	0	0	0	0	0	0	0	0	0	0	0	0	0	0	0	0	0	0	0	0	0	0	0	0	0	0	0	0	0	0	0	0
11569200	3	143196619	0	0	0	0.017	TFDP2	transcription factor Dp-2 (E2F dimerization partner 2)	Nonsynon	0.84		1	6	3.35	0	0	0	0	0	0	0	0	1	0	0	0	0	0	0	0	0	0	0	0	0	0	0	0	0	0	0	0	0	0	0	0	0	1	1
11698783	20	60811219	.	.	.	.	NTSR1	neurotensin receptor 1 (high affinity)	Nonsynon	0.84	Goldman Gene	.	.	3.35	0	1	0	0	0	0	0	0	0	0	0	0	0	0	0	0	0	0	0	0	0	0	0	0	0	0	0	0	0	0	0	0	0	0	0
11717113	3	18411328	0	0	0	0	SATB1	SATB homeobox 1	Nonsynon	0.84		1	6	3.35	0	0	0	0	0	0	0	0	0	0	0	0	0	0	0	0	0	0	0	0	0	0	0	0	0	0	0	0	0	0	0	0	0	0	0
12452520	17	7047829	.	.	.	.	DLG4	discs, large homolog 4 (Drosophila)	Nonsynon	0.84	Special	.	.	3.35	0	0	0	0	0	0	0	0	0	0	0	0	0	0	0	0	0	0	0	0	0	0	0	0	0	0	0	0	0	0	0	0	0	0	0
12509135	4	149576096	0	0	0	0	NR3C2	nuclear receptor subfamily 3, group C, member 2	Nonsynon	0.84	Special	.	.	3.35	0	0	0	0	0	0	0	0	1	0	0	0	0	0	0	0	0	0	0	0	0	0	0	0	0	0	0	0	0	0	0	0	0	1	1
12609687	19	47258509	0	0	0	0	GRIK5	glutamate receptor, ionotropic, kainate 5	Nonsynon	0.84	The Glutamatergic System	.	.	3.35	0	0	0	0	0	0	0	0	1	0	0	0	0	0	0	0	0	0	0	0	0	0	0	0	0	0	0	0	0	0	0	0	0	1	1
13023605	2	112354801	.	.	.	.	ANAPC1	anaphase promoting complex subunit 1	Nonsynon	0.84		1	14	3.35	0	0	0	0	0	0	0	0	0	0	0	0	0	0	0	0	0	0	0	0	0	0	0	0	0	0	0	0	0	0	0	0	0	0	0
13306477	17	42719610	0	0	0	0	ITGB3	integrin, beta 3 (platelet glycoprotein IIIa, antigen CD61)	Intron	0.84	Special	1	6	3.35	0	0	0	0	0	0	0	0	0	0	0	0	0	0	0	0	0	0	0	0	0	0	0	0	0	0	0	0	0	0	0	0	0	0	0
13306478	17	42719618	.	.	.	.	ITGB3	integrin, beta 3 (platelet glycoprotein IIIa, antigen CD61)	Intron	0.84	Special	1	6	3.35	0	0	0	0	0	0	0	0	0	0	0	0	0	0	0	0	0	0	0	0	0	0	0	0	0	0	0	0	0	0	0	0	0	0	0
13306591	4	149577014	0	0	0	0	NR3C2	nuclear receptor subfamily 3, group C, member 2	Nonsynon	0.84	Special	.	.	3.35	0	0	0	0	0	0	0	0	1	0	0	0	0	0	0	0	0	0	0	0	0	0	0	0	0	0	0	0	0	0	0	0	0	1	1
17157907	11	62688625	0.008	0	0	0.05	LOC387601	solute carrier family 22, member 25	Nonsynon	0.84		1	6	3.35	0	0	0	0	0	0	0	0	1	0	0	0	0	0	0	0	0	0	0	0	0	0	0	0	0	0	0	0	0	0	0	0	1	1	1
17414159	6	52766962	.	.	.	.	GSTA1	glutathione S-transferase A1	Nonsynon	0.84	Special	.	.	3.35	0	0	0	0	0	0	0	0	0	0	0	0	0	0	0	0	0	0	0	0	0	0	0	0	0	0	0	0	0	0	0	0	0	0	0
17706245	17	3423740	0.035	0.023	0.012	.	TRPV1	transient receptor potential cation channel, subfamily V, member 1	Nonsynon	0.84	Special	.	.	3.35	0	0	0	0	0	0	0	0	0	0	0	0	0	0	0	0	0	0	0	0	0	0	0	0	0	0	0	0	0	0	0	0	0	0	0
17849204	11	61052105	.	.	.	.	SYT7	synaptotagmin VII	Synon	0.84	Special	0	3	3.35	0	0	0	0	0	0	0	0	0	0	0	0	0	0	0	0	0	0	0	0	0	0	0	0	0	0	0	0	0	0	0	0	0	0	0
17852897	19	55827784	.	.	.	.	SYT3	synaptotagmin III	Nonsynon	0.84	Special	.	.	3.35	0	0	0	0	0	0	0	0	0	0	0	0	0	0	0	0	0	0	0	0	0	0	0	0	0	0	0	0	0	0	0	0	0	0	0
17853770	2	11727283	.	.	.	.	NTSR2	neurotensin receptor 2	Nonsynon	0.84	Goldman Gene	.	.	3.35	0	0	0	0	0	0	0	0	0	0	0	0	0	0	0	0	0	0	0	0	0	0	0	0	0	0	0	0	0	0	0	0	0	0	0
17856204	2	219157686	.	.	.	.	RQCD1	RCD1 required for cell differentiation1 homolog (S. pombe)	Nonsynon	0.84		1	6	3.35	0	0	0	0	0	0	0	0	0	0	0	0	0	0	0	0	0	0	0	0	0	0	0	0	0	0	0	0	0	0	0	0	0	0	0
17856369	3	14158106	0	0	0	0	TMEM43	transmembrane protein 43	Nonsynon	0.84		1	8	3.35	0	0	0	0	0	0	0	0	0	0	0	0	0	0	0	0	0	0	0	0	0	0	0	0	0	0	0	0	0	0	0	0	0	0	0
17857336	7	5306654	.	.	.	.	SLC29A4	solute carrier family 29 (nucleoside transporters), member 4	Nonsynon	0.84	Special	.	.	3.35	0	0	0	0	0	0	0	0	0	0	0	0	0	0	0	0	0	0	0	0	0	0	0	0	0	0	0	0	0	0	0	0	0	0	0
17878633	19	44590307	.	.	.	.	ZFP36	zinc finger protein 36, C3H type, homolog (mouse)	Nonsynon	0.84		1	6	3.35	0	0	0	0	0	0	0	0	0	0	0	0	0	0	0	0	0	0	0	0	0	0	0	0	0	0	0	0	0	0	0	0	0	0	0
17884899	19	44591168	.	.	.	.	ZFP36	zinc finger protein 36, C3H type, homolog (mouse)	Nonsynon	0.84		1	6	3.35	0	0	0	0	0	0	0	0	0	0	0	0	0	0	0	0	0	0	0	0	0	0	0	0	0	0	0	0	0	0	0	0	0	0	0
17886974	19	44590973	.	.	.	.	ZFP36	zinc finger protein 36, C3H type, homolog (mouse)	Nonsynon	0.84		1	6	3.35	0	0	0	0	0	0	0	0	0	0	0	0	0	0	0	0	0	0	0	0	0	0	0	0	0	0	0	0	0	0	0	0	0	0	0
28605685	17	59644837	.	.	.	.	TEX2	testis expressed 2	Nonsynon	0.84		1	9	3.35	0	0	0	0	0	0	0	0	0	0	0	0	0	0	0	0	0	0	0	0	0	0	0	0	0	0	0	0	0	0	0	0	0	0	0
33998064	10	73161792	.	.	.	.	CDH23	cadherin-like 23	Nonsynon	0.84		1	8	3.35	0	0	0	0	0	0	0	0	0	0	0	0	0	0	0	0	0	0	0	0	0	0	0	0	0	0	0	0	0	0	0	0	0	0	0
34257083	20	60811177	.	.	.	.	NTSR1	neurotensin receptor 1 (high affinity)	Nonsynon	0.84	Goldman Gene	.	.	3.35	0	0	0	0	0	0	0	0	0	0	0	0	0	0	0	0	0	0	0	0	0	0	0	0	0	0	0	0	0	0	0	0	0	0	0
34280013	11	67542835	.	.	.	.	ALDH3B1	aldehyde dehydrogenase 3 family, member B1	Nonsynon	0.84	The Alcohol System	.	.	3.35	0	0	0	0	0	0	0	0	0	0	0	0	0	0	0	0	0	0	0	0	0	0	0	0	0	0	0	0	0	0	0	0	0	0	0
34299231	17	68677899	.	.	.	.	SSTR2	somatostatin receptor 2	Nonsynon	0.84	Special	.	.	3.35	0	0	0	0	0	0	0	0	0	0	0	0	0	0	0	0	0	0	0	0	0	0	0	0	0	0	0	0	0	0	0	0	0	0	0
34337345	16	71389319	.	.	.	.	ATBF1	zinc finger homeobox 3	Nonsynon	0.84		1	9	3.35	0	0	0	0	0	0	0	0	0	0	0	0	0	0	0	0	0	0	0	0	0	0	0	0	0	0	0	0	0	0	0	0	0	0	0
34347676	5	76285698	.	.	.	.	CRHBP	corticotropin releasing hormone binding protein	Synon	0.84	Special	0	3	3.35	0	0	0	0	0	0	0	0	0	0	0	0	0	0	0	0	0	0	0	0	0	0	0	0	0	0	0	0	0	0	0	0	0	0	0
34413634	11	118467417	.	.	.	.	HMBS	hydroxymethylbilane synthase	Nonsynon	0.84		1	7	3.35	0	0	0	0	0	0	0	0	0	0	0	0	0	0	0	0	0	0	0	0	0	0	0	0	0	0	0	0	0	0	0	0	0	0	0
34454397	4	96309428	.	.	.	.	UNC5C	unc-5 homolog C (C. elegans)	Nonsynon	0.84		1	6	3.35	0	0	0	0	0	0	0	0	0	0	0	0	0	0	0	0	0	0	0	0	0	0	0	0	0	0	0	0	0	0	0	0	0	0	0
34507711	15	63082494	.	.	.	.	MTFMT	mitochondrial methionyl-tRNA formyltransferase	Nonsynon	0.84		1	6	3.35	0	0	0	0	0	0	0	0	0	0	0	0	0	0	0	0	0	0	0	0	0	0	0	0	0	0	0	0	0	0	0	0	0	0	0
34526011	15	63082550	.	.	.	.	MTFMT	mitochondrial methionyl-tRNA formyltransferase	Nonsynon	0.84		1	6	3.35	0	0	0	0	0	0	0	0	0	0	0	0	0	0	0	0	0	0	0	0	0	0	0	0	0	0	0	0	0	0	0	0	0	0	0
34652745	2	112354870	.	.	.	.	ANAPC1	anaphase promoting complex subunit 1	Nonsynon	0.84		1	14	3.35	0	0	0	0	0	0	0	0	0	0	0	0	0	0	0	0	0	0	0	0	0	0	0	0	0	0	0	0	0	0	0	0	0	0	0
34701357	3	132925035	.	.	.	.	CPNE4	copine IV	Nonsynon	0.84		1	9	3.35	0	0	0	0	0	0	0	0	0	0	0	0	0	0	0	0	0	0	0	0	0	0	0	0	0	0	0	0	0	0	0	0	0	0	0
34752904	17	59644729	.	.	.	.	TEX2	testis expressed 2	Nonsynon	0.84		1	9	3.35	0	0	0	0	0	0	0	0	0	0	0	0	0	0	0	0	0	0	0	0	0	0	0	0	0	0	0	0	0	0	0	0	0	0	0
34761141	5	76285701	.	.	.	.	CRHBP	corticotropin releasing hormone binding protein	Synon	0.84	Special	0	3	3.35	0	0	0	0	0	0	0	0	0	0	0	0	0	0	0	0	0	0	0	0	0	0	0	0	0	0	0	0	0	0	0	0	0	0	0
34807597	15	39924493	.	.	.	.	PLA2G4B	phospholipase A2, group IVB (cytosolic)	Nonsynon	0.84	Special	.	.	3.35	0	0	0	0	0	0	0	0	0	0	0	0	0	0	0	0	0	0	0	0	0	0	0	0	0	0	0	0	0	0	0	0	0	0	0
34906338	2	32543342	.	.	.	.	BIRC6	baculoviral IAP repeat-containing 6 (apollon)	Nonsynon	0.84		1	9	3.35	0	0	0	0	0	0	0	0	0	0	0	0	0	0	0	0	0	0	0	0	0	0	0	0	0	0	0	0	0	0	0	0	0	0	0
34914499	22	35038162	.	.	.	.	MYH9	myosin, heavy chain 9, non-muscle	Nonsynon	0.84		1	6	3.35	0	0	0	0	0	0	0	0	0	0	0	0	0	0	0	0	0	0	0	0	0	0	0	0	0	0	0	0	0	0	0	0	0	0	0
34956386	11	61268243	.	.	.	.	C11orf11	diacylglycerol lipase, alpha	Nonsynon	0.84	Special	.	.	3.35	0	0	0	0	0	0	0	0	0	0	0	0	0	0	0	0	0	0	0	0	0	0	0	0	0	0	0	0	0	0	0	0	0	0	0
34996650	1	22040686	.	.	.	.	HSPG2	heparan sulfate proteoglycan 2	Nonsynon	0.84		1	6	3.35	0	0	0	0	0	0	0	0	0	0	0	0	0	0	0	0	0	0	0	0	0	0	0	0	0	0	0	0	0	0	0	0	0	0	0
35045776	3	9734877	.	.	.	.	CPNE9	copine family member IX	Nonsynon	0.84		1	6	3.35	0	0	0	0	0	0	0	0	0	0	0	0	0	0	0	0	0	0	0	0	0	0	0	0	0	0	0	0	0	0	0	0	0	0	0
35056845	11	61267612	.	.	.	.	C11orf11	diacylglycerol lipase, alpha	Nonsynon	0.84	Special	.	.	3.35	0	0	0	0	0	0	0	0	0	0	0	0	0	0	0	0	0	0	0	0	0	0	0	0	0	0	0	0	0	0	0	0	0	0	0
35058221	4	45958835	.	.	.	.	GABRA2	gamma-aminobutyric acid (GABA) A receptor, alpha 2	Synon	0.84	The GABA System	0	3	3.35	0	0	0	0	0	0	0	0	0	0	0	0	0	0	0	0	0	0	0	0	0	0	0	0	0	0	0	0	0	0	0	0	0	0	0
35086213	3	33623096	.	.	.	.	CLASP2	cytoplasmic linker associated protein 2	Nonsynon	0.84		1	7	3.35	0	0	0	0	0	0	0	0	0	0	0	0	0	0	0	0	0	0	0	0	0	0	0	0	0	0	0	0	0	0	0	0	0	0	0
35114924	1	195395241	.	.	.	.	ZBTB41	zinc finger and BTB domain containing 41	Nonsynon	0.84		1	7	3.35	0	0	0	0	0	0	0	0	0	0	0	0	0	0	0	0	0	0	0	0	0	0	0	0	0	0	0	0	0	0	0	0	0	0	0
35385902	4	100487302	.	.	.	.	ADH1C	alcohol dehydrogenase 1C (class I), gamma polypeptide	Nonsynon	0.84	The Alcohol System	.	.	3.35	0	0	0	0	0	0	0	0	0	0	0	0	0	0	0	0	0	0	0	0	0	0	0	0	0	0	0	0	0	0	0	0	0	0	0
35422295	10	33241005	.	.	.	.	ITGB1	integrin, beta 1 (fibronectin receptor, beta polypeptide, antigen CD29 includes MDF2, MSK12)	Nonsynon	0.84	Special	.	.	3.35	0	0	0	0	0	0	0	0	0	0	0	0	0	0	0	0	0	0	0	0	0	0	0	0	0	0	0	0	0	0	0	0	0	0	0
35455629	11	64191614	.	.	.	.	NRXN2	neurexin 2	Nonsynon	0.84		1	8	3.35	0	0	0	0	0	0	0	0	0	0	0	0	0	0	0	0	0	0	0	0	0	0	0	0	0	0	0	0	0	0	0	0	0	0	0
35542633	23	151569585	.	.	.	.	GABRQ	gamma-aminobutyric acid (GABA) receptor, theta	Nonsynon	0.84	The GABA System	.	.	3.35	0	0	0	0	0	0	0	0	0	0	0	0	0	0	0	0	0	0	0	0	0	0	0	0	0	0	0	0	0	0	0	0	0	0	0
35566288	3	142981969	.	.	.	.	GRK7	G protein-coupled receptor kinase 7	Nonsynon	0.84	The Adrenergic System	.	.	3.35	0	0	0	0	0	0	0	0	0	0	0	0	0	0	0	0	0	0	0	0	0	0	0	0	0	0	0	0	0	0	0	0	0	0	0
35595680	2	166638194	.	.	.	.	SCN1A	sodium channel, voltage-gated, type I, alpha subunit	Nonsynon	0.84	Special	.	.	3.35	0	0	0	0	0	0	0	0	0	0	0	0	0	0	0	0	0	0	0	0	0	0	0	0	0	0	0	0	0	0	0	0	0	0	0
35665927	22	37019252	.	.	.	.	CSNK1E	casein kinase 1, epsilon	Nonsynon	0.84	Goldman Gene	.	.	3.35	0	0	0	0	0	0	0	0	0	0	0	0	0	0	0	0	0	0	0	0	0	0	0	0	0	0	0	0	0	0	0	0	0	0	0
35810986	11	47426059	.	.	.	.	RAPSN	receptor-associated protein of the synapse	Nonsynon	0.84	Special	.	.	3.35	0	0	0	0	0	0	0	0	0	0	0	0	0	0	0	0	0	0	0	0	0	0	0	0	0	0	0	0	0	0	0	0	0	0	0
35819514	17	7046982	.	.	.	.	DLG4	discs, large homolog 4 (Drosophila)	Nonsynon	0.84	Special	.	.	3.35	0	0	0	0	0	0	0	0	0	0	0	0	0	0	0	0	0	0	0	0	0	0	0	0	0	0	0	0	0	0	0	0	0	0	0
35871862	7	107368018	.	.	.	.	LAMB1	laminin, beta 1	Nonsynon	0.84		1	15	3.35	0	0	0	0	0	0	0	0	0	0	0	0	0	0	0	0	0	0	0	0	0	0	0	0	0	0	0	0	0	0	0	0	0	0	0
35920464	9	103375482	.	.	.	.	GRIN3A	glutamate receptor, ionotropic, N-methyl-D-aspartate 3A	Nonsynon	0.84	The Glutamatergic System	.	.	3.35	0	0	0	0	0	0	0	0	0	0	0	0	0	0	0	0	0	0	0	0	0	0	0	0	0	0	0	0	0	0	0	0	0	0	0
35942678	3	124633157	.	.	.	.	ADCY5	adenylate cyclase 5	Intron	0.84	Special	1	7	3.35	0	0	0	0	0	0	0	0	0	0	0	0	0	0	0	0	0	0	0	0	0	0	0	0	0	0	0	0	0	0	0	0	0	0	0
35949385	17	59643829	.	.	.	.	TEX2	testis expressed 2	Nonsynon	0.84		1	9	3.35	0	0	0	0	0	0	0	0	0	0	0	0	0	0	0	0	0	0	0	0	0	0	0	0	0	0	0	0	0	0	0	0	0	0	0
36031925	8	37942088	.	.	.	.	ADRB3	adrenergic, beta-3-, receptor	Nonsynon	0.84	The Adrenergic System	.	.	3.35	0	0	0	0	0	0	0	0	0	0	0	0	0	0	0	0	0	0	0	0	0	0	0	0	0	0	0	0	0	0	0	0	0	0	0
36083134	3	14158189	.	.	.	.	TMEM43	transmembrane protein 43	Nonsynon	0.84		1	8	3.35	0	0	0	0	0	0	0	0	0	0	0	0	0	0	0	0	0	0	0	0	0	0	0	0	0	0	0	0	0	0	0	0	0	0	0
41277690	15	39924063	.	.	.	.	PLA2G4B	phospholipase A2, group IVB (cytosolic)	Nonsynon	0.84	Special	.	.	3.35	0	0	0	0	0	0	0	0	0	0	0	0	0	0	0	0	0	0	0	0	0	0	0	0	0	0	0	0	0	0	0	0	0	0	0
41281318	10	73162079	.	.	.	.	CDH23	cadherin-like 23	Nonsynon	0.84		1	8	3.35	0	0	0	0	0	0	0	0	0	0	0	0	0	0	0	0	0	0	0	0	0	0	0	0	0	0	0	0	0	0	0	0	0	0	0
41310382	1	22064140	.	.	.	.	HSPG2	heparan sulfate proteoglycan 2	Nonsynon	0.84		1	6	3.35	0	0	0	0	0	0	0	0	0	0	0	0	0	0	0	0	0	0	0	0	0	0	0	0	0	0	0	0	0	0	0	0	0	0	0
41545019	5	80145235	.	.	.	.	MSH3	mutS homolog 3 (E. coli)	Nonsynon	0.84		1	6	3.35	0	0	0	0	0	0	0	0	0	0	0	0	0	0	0	0	0	0	0	0	0	0	0	0	0	0	0	0	0	0	0	0	0	0	0
45599742	1	169570460	.	.	.	.	FMO4	flavin containing monooxygenase 4	Nonsynon	0.84	The Nicotine Metabolism System	.	.	3.35	0	0	0	0	0	0	0	0	0	0	0	0	0	0	0	0	0	0	0	0	0	0	0	0	0	0	0	0	0	0	0	0	0	0	0
6299	1	23392506	0	0	0	0.034	HTR1D	5-hydroxytryptamine (serotonin) receptor 1D	Nonsynon	0.83	The Serotonergic System	.	.	3.34	0	0	0	0	0	0	0	0	1	0	0	0	0	0	0	0	0	0	0	0	0	0	0	0	0	0	0	0	0	0	0	0	0	1	1
6330	1	115630836	0.483	0.133	0.227	0.158	NGFB	nerve growth factor, beta polypeptide	Nonsynon	0.83	Goldman Gene	.	.	3.34	0	1	0	0	1	1	1	1	1	0	0	0	0	0	0	0	0	1	1	1	1	1	1	1	1	1	1	1	1	1	1	1	1	1	1
60637	12	50487009	0.25	0.478	0.489	0.229	SCN8A	sodium channel, voltage gated, type VIII, alpha subunit	Synon	0.83	Special	0	3	3.34	0	0	0	0	0	0	0	0	1	1	1	1	0	1	1	1	1	1	1	1	0	1	1	1	0	1	1	1	0	1	1	1	0	1	1
140685	15	24771205	0.408	0.378	0.289	0.433	GABRA5	gamma-aminobutyric acid (GABA) A receptor, alpha 5	Nonsynon	0.83	The GABA System	.	.	3.34	0	0	0	0	1	1	1	1	1	1	1	1	0	1	1	1	0	1	1	1	1	1	1	1	1	1	1	1	1	1	1	1	1	1	1
171114	3	8784686	.	.	.	.	OXTR	oxytocin receptor	Nonsynon	0.83	Special	.	.	3.34	0	0	0	0	0	0	0	0	0	0	0	0	0	0	0	0	0	0	0	0	0	0	0	0	0	0	0	0	0	0	0	0	0	0	0
184967	5	80185737	0.092	0	0	0.083	MSH3	mutS homolog 3 (E. coli)	Nonsynon	0.83		1	6	3.34	0	0	0	0	1	1	1	1	1	1	0	0	1	1	0	0	1	1	1	1	1	1	1	1	1	1	1	1	1	1	1	1	1	1	1
189386	3	8784810	.	.	.	.	OXTR	oxytocin receptor	Nonsynon	0.83	Special	.	.	3.34	0	0	0	0	0	0	0	0	0	0	0	0	0	0	0	0	0	0	0	0	0	0	0	0	0	0	0	0	0	0	0	0	0	0	0
222747	17	3439949	0.183	0.456	0.432	0.058	TRPV1	transient receptor potential cation channel, subfamily V, member 1	Nonsynon	0.83	Special	.	.	3.34	0	0	0	0	0	0	0	0	0	0	0	0	0	0	0	0	0	0	0	0	0	0	0	0	0	0	0	0	0	0	0	0	0	0	0
237901	3	8784056	.	.	.	.	OXTR	oxytocin receptor	Nonsynon	0.83	Special	.	.	3.34	0	0	0	0	0	0	0	0	0	0	0	0	0	0	0	0	0	0	0	0	0	0	0	0	0	0	0	0	0	0	0	0	0	0	0
237903	3	8784788	.	.	.	.	OXTR	oxytocin receptor	Nonsynon	0.83	Special	.	.	3.34	0	0	0	0	0	0	0	0	0	0	0	0	0	0	0	0	0	0	0	0	0	0	0	0	0	0	0	0	0	0	0	0	0	0	0
237906	3	8784828	.	.	.	.	OXTR	oxytocin receptor	Nonsynon	0.83	Special	.	.	3.34	0	0	0	0	0	0	0	0	0	0	0	0	0	0	0	0	0	0	0	0	0	0	0	0	0	0	0	0	0	0	0	0	0	0	0
237907	3	8784834	.	.	.	.	OXTR	oxytocin receptor	Nonsynon	0.83	Special	.	.	3.34	0	0	0	0	0	0	0	0	0	0	0	0	0	0	0	0	0	0	0	0	0	0	0	0	0	0	0	0	0	0	0	0	0	0	0
237908	3	8784855	.	.	.	.	OXTR	oxytocin receptor	Nonsynon	0.83	Special	.	.	3.34	0	0	0	0	0	0	0	0	0	0	0	0	0	0	0	0	0	0	0	0	0	0	0	0	0	0	0	0	0	0	0	0	0	0	0
279858	4	46009350	0.483	0.5	0.367	0.158	GABRA2	gamma-aminobutyric acid (GABA) A receptor, alpha 2	Synon	0.83	The GABA System	0	3	3.34	0	0	0	0	0	0	0	0	1	1	1	1	1	1	1	1	1	1	1	1	1	1	1	1	1	1	1	1	1	1	1	1	1	1	1
308341	11	67551875	0	.	.	0	ALDH3B1	aldehyde dehydrogenase 3 family, member B1	Nonsynon	0.83	The Alcohol System	.	.	3.34	0	0	0	0	0	0	0	0	0	0	0	0	0	0	0	0	0	0	0	0	0	0	0	0	0	0	0	0	0	0	0	0	0	0	0
769194	7	126670466	0	0	0.011	0	GRM8	glutamate receptor, metabotropic 8	Nonsynon	0.83	The Glutamatergic System	.	.	3.34	0	0	0	0	0	0	0	0	1	0	0	0	0	0	0	0	0	0	0	0	0	0	0	0	0	0	0	0	0	0	0	0	0	1	1
769202	7	126670433	0	0	0	0	GRM8	glutamate receptor, metabotropic 8	Nonsynon	0.83	The Glutamatergic System	.	.	3.34	0	0	0	0	0	0	0	0	1	0	0	0	0	0	0	0	0	0	0	0	0	0	0	0	0	0	0	0	0	0	0	0	0	1	1
870124	1	3318218	0.175	0.011	0	0	PRDM16	PR domain containing 16	Nonsynon	0.83		1	7	3.34	0	0	0	0	1	1	1	1	1	0	0	0	0	0	0	0	0	1	1	1	1	1	1	1	1	1	1	1	1	1	1	1	1	1	1
1051268	20	10221838	0	0	0	0	SNAP25	synaptosomal-associated protein, 25kDa	Nonsynon	0.83	Special	.	.	3.34	0	0	0	0	0	0	0	0	0	0	0	0	0	0	0	0	0	0	0	0	0	0	0	0	0	0	0	0	0	0	0	0	0	0	0
1051270	20	10221843	0	0	0	0	SNAP25	synaptosomal-associated protein, 25kDa	Nonsynon	0.83	Special	.	.	3.34	0	0	0	0	0	0	0	0	0	0	0	0	0	0	0	0	0	0	0	0	0	0	0	0	0	0	0	0	0	0	0	0	0	0	0
1051276	20	10221881	0	0	0	0	SNAP25	synaptosomal-associated protein, 25kDa	Nonsynon	0.83	Special	.	.	3.34	0	0	0	0	0	0	0	0	0	0	0	0	0	0	0	0	0	0	0	0	0	0	0	0	0	0	0	0	0	0	0	0	0	0	0
1051281	20	10221896	.	.	.	.	SNAP25	synaptosomal-associated protein, 25kDa	Nonsynon	0.83	Special	.	.	3.34	0	0	0	0	0	0	0	0	0	0	0	0	0	0	0	0	0	0	0	0	0	0	0	0	0	0	0	0	0	0	0	0	0	0	0
1051489	5	32436023	0.292	0.244	0.273	0.092	ZFR	zinc finger RNA binding protein	Nonsynon	0.83		1	6	3.34	0	0	0	0	1	1	1	1	1	1	1	1	0	1	1	1	0	1	1	1	1	1	1	1	1	1	1	1	1	1	1	1	1	1	1
1051983	6	52764638	.	.	.	.	GSTA1	glutathione S-transferase A1	Nonsynon	0.83	Special	.	.	3.34	0	0	0	0	0	0	0	0	0	0	0	0	0	0	0	0	0	0	0	0	0	0	0	0	0	0	0	0	0	0	0	0	0	0	0
1052660	1	243085862	0	0	0	0	HNRPU	heterogeneous nuclear ribonucleoprotein U (scaffold attachment factor A)	Nonsynon	0.83		1	6	3.34	0	0	0	0	0	0	0	0	0	0	0	0	0	0	0	0	0	0	0	0	0	0	0	0	0	0	0	0	0	0	0	0	0	0	0
1057114	20	1843889	.	.	.	.	PTPNS1	signal-regulatory protein alpha	Nonsynon	0.83	Special	.	.	3.34	0	0	0	0	0	0	0	0	0	0	0	0	0	0	0	0	0	0	0	0	0	0	0	0	0	0	0	0	0	0	0	0	0	0	0
1135200	20	1843950	.	.	.	.	PTPNS1	signal-regulatory protein alpha	Nonsynon	0.83	Special	.	.	3.34	0	0	0	0	0	0	0	0	0	0	0	0	0	0	0	0	0	0	0	0	0	0	0	0	0	0	0	0	0	0	0	0	0	0	0
1356410	15	40222129	0.317	0.1	0.089	0.133	PLA2G4F	phospholipase A2, group IVF	Nonsynon	0.83	Special	.	.	3.34	0	0	0	0	1	1	1	1	1	0	0	0	0	0	0	0	0	1	1	1	1	1	1	1	1	1	1	1	1	1	1	1	1	1	1
2228154	12	61830868	.	0	0	.	AVPR1A	arginine vasopressin receptor 1A	Nonsynon	0.83	Goldman Gene	.	.	3.34	0	0	0	0	0	0	0	0	1	0	0	0	0	0	0	0	0	0	0	0	0	0	0	0	0	0	0	0	0	0	0	0	0	1	1
2228413	2	218708650	.	.	.	.	IL8RB	interleukin 8 receptor, beta	Nonsynon	0.83		1	6	3.34	0	0	0	0	0	0	0	0	0	0	0	0	0	0	0	0	0	0	0	0	0	0	0	0	0	0	0	0	0	0	0	0	0	0	0
2229481	1	22073585	0.025	0	0	0.217	HSPG2	heparan sulfate proteoglycan 2	Nonsynon	0.83		1	6	3.34	0	0	0	0	0	1	1	1	1	0	0	0	0	0	0	0	1	0	0	0	0	1	1	1	1	1	1	1	1	1	1	1	1	1	1
2232302	6	142532489	0	0	0	0	C6orf55	Vps20-associated 1 homolog (S. cerevisiae)	Nonsynon	0.83		1	7	3.34	0	0	0	0	0	0	0	0	1	0	0	0	0	0	0	0	0	0	0	0	0	0	0	0	0	0	0	0	0	0	0	0	0	1	1
2269529	22	35014300	0	0.422	0.422	0.042	MYH9	myosin, heavy chain 9, non-muscle	Nonsynon	0.83		1	6	3.34	0	0	0	0	1	1	1	1	1	0	0	0	0	0	0	0	0	1	1	1	1	1	1	1	1	1	1	1	1	1	1	1	1	1	1
2493292	1	3318519	0.183	0.022	0	0.175	PRDM16	PR domain containing 16	Nonsynon	0.83		1	7	3.34	0	0	0	0	1	1	1	1	1	0	0	0	0	1	0	0	0	1	1	1	1	1	1	1	1	1	1	1	1	1	1	1	1	1	1
2617604	5	1496189	.	.	.	.	SLC6A3	solute carrier family 6 (neurotransmitter transporter, dopamine), member 3	Nonsynon	0.83	The Dopamine System	.	.	3.34	0	0	0	0	0	0	0	0	0	0	0	0	0	0	0	0	0	0	0	0	0	0	0	0	0	0	0	0	0	0	0	0	0	0	0
3178412	12	112019105	.	.	.	.	DTX1	deltex homolog 1 (Drosophila)	Nonsynon	0.83		1	6	3.34	0	0	0	0	0	0	0	0	0	0	0	0	0	0	0	0	0	0	0	0	0	0	0	0	0	0	0	0	0	0	0	0	0	0	0
3730307	12	47463262	.	.	.	.	ADCY6	adenylate cyclase 6	Nonsynon	0.83	Special	.	.	3.34	0	0	0	0	0	0	0	0	0	0	0	0	0	0	0	0	0	0	0	0	0	0	0	0	0	0	0	0	0	0	0	0	0	0	0
3731880	2	219628778	0	0	0	0	IHH	Indian hedgehog homolog (Drosophila)	Nonsynon	0.83		1	8	3.34	0	0	0	0	0	0	0	0	0	0	0	0	0	0	0	0	0	0	0	0	0	0	0	0	0	0	0	0	0	0	0	0	0	0	0
3751082	11	67551929	0.271	0.222	0.125	0.229	ALDH3B1	aldehyde dehydrogenase 3 family, member B1	Nonsynon	0.83	The Alcohol System	.	.	3.34	0	0	0	0	0	0	0	0	0	0	0	0	0	0	0	1	0	1	0	1	0	1	0	1	0	1	0	1	0	1	0	1	0	1	0
3891058	1	204391735	.	.	.	.	AVPR1B	arginine vasopressin receptor 1B	Nonsynon	0.83	Goldman Gene	.	.	3.34	0	0	0	0	0	0	0	0	0	0	0	0	0	0	0	0	0	0	0	0	0	0	0	0	0	0	0	0	0	0	0	0	0	0	0
4686302	3	8784222	0.108	0.156	0.178	0.017	OXTR	oxytocin receptor	Nonsynon	0.83	Special	.	.	3.34	0	0	0	1	1	1	1	1	1	0	1	1	0	1	1	1	1	1	1	1	1	1	1	1	1	1	1	1	1	1	1	1	1	1	1
4890026	17	76060297	0.259	0.178	0.148	0.153	NPTX1	neuronal pentraxin I	Synon	0.83	Special	0	3	3.34	0	0	0	0	0	0	0	0	1	0	0	0	0	0	0	0	0	0	0	0	0	1	1	1	0	1	1	1	0	1	1	1	0	1	1
5031016	19	46041614	.	.	.	.	CYP2A6	cytochrome P450, family 2, subfamily A, polypeptide 6	Nonsynon	0.83	The Nicotine Metabolism System	.	.	3.34	1	0	0	0	0	0	0	0	0	0	0	0	0	0	0	0	0	0	0	0	0	0	0	0	0	0	0	0	0	0	0	0	0	0	0
5031017	19	46041590	.	.	.	0.125	CYP2A6	cytochrome P450, family 2, subfamily A, polypeptide 6	Nonsynon	0.83	The Nicotine Metabolism System	.	.	3.34	1	0	0	0	0	0	0	0	0	0	0	0	0	0	0	0	0	0	0	0	0	0	0	0	0	0	0	0	0	0	0	0	0	0	0
6003030	22	41794360	0	0.011	0	0	TTLL1	tubulin tyrosine ligase-like family, member 1	Nonsynon	0.83		1	6	3.34	0	0	0	0	0	0	0	0	0	0	0	0	0	0	0	0	0	0	0	0	0	0	0	0	0	0	0	0	0	0	0	0	0	0	0
6413474	19	46041599	.	.	.	.	CYP2A6	cytochrome P450, family 2, subfamily A, polypeptide 6	Nonsynon	0.83	The Nicotine Metabolism System	.	.	3.34	1	0	0	0	0	0	0	0	0	0	0	0	0	0	0	0	0	0	0	0	0	0	0	0	0	0	0	0	0	0	0	0	0	0	0
6677543	1	23393185	0	0	0	0	HTR1D	5-hydroxytryptamine (serotonin) receptor 1D	Nonsynon	0.83	The Serotonergic System	.	.	3.34	0	0	0	0	0	0	0	0	0	0	0	0	0	0	0	0	0	0	0	0	0	0	0	0	0	0	0	0	0	0	0	0	0	0	0
7155325	14	89934300	.	.	.	.	CALM1	calmodulin 1 (phosphorylase kinase, delta)	Intron	0.83	Special	1	11	3.34	0	0	0	0	0	0	0	0	0	0	0	0	0	0	0	0	0	0	0	0	0	0	0	0	0	0	0	0	0	0	0	0	0	0	0
7620415	3	10891663	0	0	0	.	SLC6A11	solute carrier family 6 (neurotransmitter transporter, GABA), member 11	Synon	0.83	The GABA System	0	3	3.34	0	0	0	0	0	0	1	0	0	0	0	0	0	0	0	0	0	0	0	0	0	0	0	0	0	1	1	1	1	0	0	0	0	0	0
9658356	12	116208401	0.009	0	0	0	NOS1	nitric oxide synthase 1 (neuronal)	Nonsynon	0.83	Special	.	.	3.34	0	0	0	0	0	0	0	0	1	0	0	0	0	0	0	0	0	0	0	0	0	0	0	0	0	0	0	0	0	0	0	0	0	1	1
10201766	2	218708475	0	0	0	0	IL8RB	interleukin 8 receptor, beta	Nonsynon	0.83		1	6	3.34	0	0	0	0	0	0	0	0	1	0	0	0	0	0	0	0	0	0	0	0	0	0	0	0	0	0	0	0	0	0	0	0	0	1	1
11436139	11	67551954	.	.	.	.	ALDH3B1	aldehyde dehydrogenase 3 family, member B1	Nonsynon	0.83	The Alcohol System	.	.	3.34	0	0	0	0	0	0	0	0	0	0	0	0	0	0	0	0	0	0	0	0	0	0	0	0	0	0	0	0	0	0	0	0	0	0	0
11466110	1	115630726	0	0	0	0.009	NGFB	nerve growth factor, beta polypeptide	Nonsynon	0.83	Goldman Gene	.	.	3.34	0	1	0	0	0	0	0	0	1	0	0	0	0	0	0	0	0	0	0	0	0	0	0	0	0	0	0	0	0	0	0	0	0	1	1
11466111	1	115630701	0	0	0	0	NGFB	nerve growth factor, beta polypeptide	Nonsynon	0.83	Goldman Gene	.	.	3.34	0	0	0	0	0	0	0	0	1	0	0	0	0	0	0	0	0	0	0	0	0	0	0	0	0	0	0	0	0	0	0	0	0	1	1
11466112	1	115630279	0	0	0	0	NGFB	nerve growth factor, beta polypeptide	Nonsynon	0.83	Goldman Gene	.	.	3.34	0	1	0	0	0	0	0	0	1	0	0	0	0	0	0	0	0	0	0	0	0	0	0	0	0	0	0	0	0	0	0	0	0	1	1
11537736	1	243086480	0	0	0	0	HNRPU	heterogeneous nuclear ribonucleoprotein U (scaffold attachment factor A)	Nonsynon	0.83		1	6	3.34	0	0	0	0	0	0	0	0	0	0	0	0	0	0	0	0	0	0	0	0	0	0	0	0	0	0	0	0	0	0	0	0	0	0	0
11541379	19	19473212	.	.	.	.	GATAD2A	GATA zinc finger domain containing 2A	Nonsynon	0.83		1	7	3.34	0	0	0	0	0	0	0	0	0	0	0	0	0	0	0	0	0	0	0	0	0	0	0	0	0	0	0	0	0	0	0	0	0	0	0
11541563	19	14069473	.	.	.	.	PRKACA	protein kinase, cAMP-dependent, catalytic, alpha	Nonsynon	0.83	Special	.	.	3.34	0	0	0	0	0	0	0	0	0	0	0	0	0	0	0	0	0	0	0	0	0	0	0	0	0	0	0	0	0	0	0	0	0	0	0
11547597	6	142532405	.	.	.	.	C6orf55	Vps20-associated 1 homolog (S. cerevisiae)	Nonsynon	0.83		1	7	3.34	0	0	0	0	0	0	0	0	0	0	0	0	0	0	0	0	0	0	0	0	0	0	0	0	0	0	0	0	0	0	0	0	0	0	0
11547600	6	142532437	0	0	0	0	C6orf55	Vps20-associated 1 homolog (S. cerevisiae)	Nonsynon	0.83		1	7	3.34	0	0	0	0	0	0	0	0	0	0	0	0	0	0	0	0	0	0	0	0	0	0	0	0	0	0	0	0	0	0	0	0	0	0	0
11547859	20	10221593	0	0	0.012	0	SNAP25	synaptosomal-associated protein, 25kDa	Nonsynon	0.83	Special	.	.	3.34	0	0	0	0	0	0	0	0	0	0	0	0	0	0	0	0	0	0	0	0	0	0	0	0	0	0	0	0	0	0	0	0	0	0	0
11548912	1	173240520	0	0	0	0	CACYBP	calcyclin binding protein	Nonsynon	0.83		1	6	3.34	0	0	0	0	0	0	0	0	0	0	0	0	0	0	0	0	0	0	0	0	0	0	0	0	0	0	0	0	0	0	0	0	0	0	0
11555542	14	93487284	.	.	.	.	ASB2	ankyrin repeat and SOCS box-containing 2	Nonsynon	0.83		1	7	3.34	0	0	0	0	0	0	0	0	0	0	0	0	0	0	0	0	0	0	0	0	0	0	0	0	0	0	0	0	0	0	0	0	0	0	0
11555911	1	120065384	0	0	0	0	PHGDH	phosphoglycerate dehydrogenase	Nonsynon	0.83		1	8	3.34	0	0	0	0	0	0	0	0	0	0	0	0	0	0	0	0	0	0	0	0	0	0	0	0	0	0	0	0	0	0	0	0	0	0	0
11556939	1	40308018	0	0	0	0	CAP1	CAP, adenylate cyclase-associated protein 1 (yeast)	Nonsynon	0.83	Special	.	.	3.34	0	0	0	0	0	0	0	0	0	0	0	0	0	0	0	0	0	0	0	0	0	0	0	0	0	0	0	0	0	0	0	0	0	0	0
11721104	3	52496429	0	0	0	0	NISCH	nischarin	Nonsynon	0.83		1	8	3.34	0	0	0	0	0	0	0	0	0	0	0	0	0	0	0	0	0	0	0	0	0	0	0	0	0	0	0	0	0	0	0	0	0	0	0
11773032	7	136350369	0	0	0	0	CHRM2	cholinergic receptor, muscarinic 2	Nonsynon	0.83	The Cholinergic System	.	.	3.34	0	0	0	0	0	0	0	0	0	0	0	0	0	0	0	0	0	0	0	0	0	0	0	0	0	0	0	0	0	0	0	0	0	0	0
12061858	1	3318096	.	.	.	.	PRDM16	PR domain containing 16	Nonsynon	0.83		1	7	3.34	0	0	0	0	0	0	0	0	0	0	0	0	0	0	0	0	0	0	0	0	0	0	0	0	0	0	0	0	0	0	0	0	0	0	0
12078107	1	40880002	0	0	0	0	RIMS3	regulating synaptic membrane exocytosis 3	Nonsynon	0.83		1	6	3.34	0	0	0	0	0	0	0	0	0	0	0	0	0	0	0	0	0	0	0	0	0	0	0	0	0	0	0	0	0	0	0	0	0	0	0
12152067	21	31966490	0.009	0	0	0	SFRS15	splicing factor, arginine/serine-rich 15	Nonsynon	0.83		1	7	3.34	0	0	0	0	0	0	0	0	1	0	0	0	0	0	0	0	0	0	0	0	0	0	0	0	0	0	0	0	0	0	0	0	0	1	1
12159146	22	20453650	0	0	0	0.042	MAPK1	mitogen-activated protein kinase 1	Intron	0.83	Special	1	23	3.34	0	1	0	0	0	0	0	0	1	0	0	0	0	0	0	0	0	0	0	0	0	0	0	0	0	0	0	0	0	0	0	0	0	1	1
12209851	6	116370436	0	0	0	0	FRK	fyn-related kinase	Nonsynon	0.83		1	6	3.34	0	0	0	0	0	0	0	0	1	0	0	0	0	0	0	0	0	0	0	0	0	0	0	0	0	0	0	0	0	0	0	0	0	1	1
12564512	1	23393116	0	0	0	0	HTR1D	5-hydroxytryptamine (serotonin) receptor 1D	Nonsynon	0.83	The Serotonergic System	.	.	3.34	0	0	0	0	0	0	0	0	0	0	0	0	0	0	0	0	0	0	0	0	0	0	0	0	0	0	0	0	0	0	0	0	0	0	0
13178795	5	71051094	0	0	0	0	CART	CART prepropeptide	Intron	0.83	Goldman Gene	1	7	3.34	0	0	0	0	0	0	0	0	0	0	0	0	0	0	0	0	0	0	0	0	0	0	0	0	0	0	0	0	0	0	0	0	0	0	0
13309334	7	126329960	0	0	0	0	GRM8	glutamate receptor, metabotropic 8	Nonsynon	0.83	The Glutamatergic System	.	.	3.34	0	0	0	0	0	0	0	0	0	0	0	0	0	0	0	0	0	0	0	0	0	0	0	0	0	0	0	0	0	0	0	0	0	0	0
13402964	2	219785378	0	0	0	0.017	ABCB6	ATP-binding cassette, sub-family B (MDR/TAP), member 6	Nonsynon	0.83		1	6	3.34	0	0	0	0	0	0	1	0	1	0	0	0	0	0	0	0	0	0	0	0	0	0	0	0	0	1	1	1	1	0	0	0	0	1	1
13415309	2	219628543	.	.	.	.	IHH	Indian hedgehog homolog (Drosophila)	Nonsynon	0.83		1	8	3.34	0	0	0	0	0	0	0	0	0	0	0	0	0	0	0	0	0	0	0	0	0	0	0	0	0	0	0	0	0	0	0	0	0	0	0
16891583	8	42730159	0	0.011	0.011	0	CHRNA6	cholinergic receptor, nicotinic, alpha 6	Nonsynon	0.83	The Nicotine System	.	.	3.34	1	0	0	0	0	0	0	0	1	0	0	0	0	0	0	0	0	0	0	0	0	0	0	0	0	0	0	0	0	0	0	0	0	1	1
17098707	10	121076087	0.026	0.011	0	0.302	GRK5	G protein-coupled receptor kinase 5	Nonsynon	0.83	The Adrenergic System	.	.	3.34	0	0	0	0	0	0	0	0	1	0	0	0	0	0	0	0	0	0	0	0	0	0	0	0	0	0	0	0	0	0	0	0	0	1	1
17128366	8	19307752	0	0	0	0.025	ChGn	-	Nonsynon	0.83		1	6	3.34	0	0	0	1	0	0	0	0	1	0	0	0	0	1	1	1	1	0	0	0	0	0	0	0	0	0	0	0	0	0	0	0	0	1	1
17846992	4	26092374	.	.	.	.	CCKAR	cholecystokinin A receptor	Nonsynon	0.83	Goldman Gene	.	.	3.34	0	0	0	0	0	0	0	0	0	0	0	0	0	0	0	0	0	0	0	0	0	0	0	0	0	0	0	0	0	0	0	0	0	0	0
17848759	17	32674582	.	.	.	.	ACACA	acetyl-Coenzyme A carboxylase alpha	Nonsynon	0.83		1	6	3.34	0	0	0	0	0	0	0	0	0	0	0	0	0	0	0	0	0	0	0	0	0	0	0	0	0	0	0	0	0	0	0	0	0	0	0
17850149	14	20749481	.	.	.	.	HNRPC	heterogeneous nuclear ribonucleoprotein C (C1/C2)	Nonsynon	0.83		1	6	3.34	0	0	0	0	0	0	0	0	0	0	0	0	0	0	0	0	0	0	0	0	0	0	0	0	0	0	0	0	0	0	0	0	0	0	0
17850311	14	20749511	.	.	.	.	HNRPC	heterogeneous nuclear ribonucleoprotein C (C1/C2)	Nonsynon	0.83		1	6	3.34	0	0	0	0	0	0	0	0	0	0	0	0	0	0	0	0	0	0	0	0	0	0	0	0	0	0	0	0	0	0	0	0	0	0	0
17855609	20	1843813	.	.	.	.	PTPNS1	signal-regulatory protein alpha	Nonsynon	0.83	Special	.	.	3.34	0	0	0	0	0	0	0	0	0	0	0	0	0	0	0	0	0	0	0	0	0	0	0	0	0	0	0	0	0	0	0	0	0	0	0
17855610	20	1843820	0	0	0	0	PTPNS1	signal-regulatory protein alpha	Nonsynon	0.83	Special	.	.	3.34	0	0	0	0	0	0	0	0	0	0	0	0	0	0	0	0	0	0	0	0	0	0	0	0	0	0	0	0	0	0	0	0	0	0	0
17855611	20	1843826	.	.	.	.	PTPNS1	signal-regulatory protein alpha	Nonsynon	0.83	Special	.	.	3.34	0	0	0	0	0	0	0	0	0	0	0	0	0	0	0	0	0	0	0	0	0	0	0	0	0	0	0	0	0	0	0	0	0	0	0
17855612	20	1843835	.	.	.	.	PTPNS1	signal-regulatory protein alpha	Nonsynon	0.83	Special	.	.	3.34	0	0	0	0	0	0	0	0	0	0	0	0	0	0	0	0	0	0	0	0	0	0	0	0	0	0	0	0	0	0	0	0	0	0	0
17855613	20	1843963	.	.	.	.	PTPNS1	signal-regulatory protein alpha	Nonsynon	0.83	Special	.	.	3.34	0	0	0	0	0	0	0	0	0	0	0	0	0	0	0	0	0	0	0	0	0	0	0	0	0	0	0	0	0	0	0	0	0	0	0
17855614	20	1843965	.	.	.	.	PTPNS1	signal-regulatory protein alpha	Nonsynon	0.83	Special	.	.	3.34	0	0	0	0	0	0	0	0	0	0	0	0	0	0	0	0	0	0	0	0	0	0	0	0	0	0	0	0	0	0	0	0	0	0	0
17855615	20	1843984	.	.	.	.	PTPNS1	signal-regulatory protein alpha	Nonsynon	0.83	Special	.	.	3.34	0	0	0	0	0	0	0	0	0	0	0	0	0	0	0	0	0	0	0	0	0	0	0	0	0	0	0	0	0	0	0	0	0	0	0
17855616	20	1843990	.	.	.	.	PTPNS1	signal-regulatory protein alpha	Nonsynon	0.83	Special	.	.	3.34	0	0	0	0	0	0	0	0	0	0	0	0	0	0	0	0	0	0	0	0	0	0	0	0	0	0	0	0	0	0	0	0	0	0	0
28382721	23	122847513	.	.	.	.	BIRC4	baculoviral IAP repeat-containing 4	Nonsynon	0.83		1	6	3.34	0	0	0	0	0	0	0	0	0	0	0	0	0	0	0	0	0	0	0	0	0	0	0	0	0	0	0	0	0	0	0	0	0	0	0
28382722	23	122847591	.	.	.	.	BIRC4	baculoviral IAP repeat-containing 4	Nonsynon	0.83		1	6	3.34	0	0	0	0	0	0	0	0	0	0	0	0	0	0	0	0	0	0	0	0	0	0	0	0	0	0	0	0	0	0	0	0	0	0	0
28382723	23	122847919	.	.	.	.	BIRC4	baculoviral IAP repeat-containing 4	Nonsynon	0.83		1	6	3.34	0	0	0	0	0	0	0	0	0	0	0	0	0	0	0	0	0	0	0	0	0	0	0	0	0	0	0	0	0	0	0	0	0	0	0
28399468	19	46041572	.	.	.	.	CYP2A6	cytochrome P450, family 2, subfamily A, polypeptide 6	Nonsynon	0.83	The Nicotine Metabolism System	.	.	3.34	0	0	0	0	0	0	0	0	0	0	0	0	0	0	0	0	0	0	0	0	0	0	0	0	0	0	0	0	0	0	0	0	0	0	0
28592888	16	71380094	.	.	.	.	ATBF1	zinc finger homeobox 3	Nonsynon	0.83		1	9	3.34	0	0	0	0	0	0	0	0	0	0	0	0	0	0	0	0	0	0	0	0	0	0	0	0	0	0	0	0	0	0	0	0	0	0	0
28622194	17	76060298	.	.	.	.	NPTX1	neuronal pentraxin I	Synon	0.83	Special	0	3	3.34	0	0	0	0	0	0	0	0	0	0	0	0	0	0	0	0	0	0	0	0	0	0	0	0	0	0	0	0	0	0	0	0	0	0	0
28674123	15	40222116	.	.	.	.	PLA2G4F	phospholipase A2, group IVF	Nonsynon	0.83	Special	.	.	3.34	0	0	0	0	0	0	0	0	0	0	0	0	0	0	0	0	0	0	0	0	0	0	0	0	0	0	0	0	0	0	0	0	0	0	0
28758211	1	115630561	.	.	.	.	NGFB	nerve growth factor, beta polypeptide	Nonsynon	0.83	Goldman Gene	.	.	3.34	0	0	0	0	0	0	0	0	0	0	0	0	0	0	0	0	0	0	0	0	0	0	0	0	0	0	0	0	0	0	0	0	0	0	0
28936694	1	169872007	.	.	.	.	MYOC	myocilin, trabecular meshwork inducible glucocorticoid response	Nonsynon	0.83		1	6	3.34	0	0	0	0	0	0	0	0	0	0	0	0	0	0	0	0	0	0	0	0	0	0	0	0	0	0	0	0	0	0	0	0	0	0	0
33990840	1	204391634	.	.	.	.	AVPR1B	arginine vasopressin receptor 1B	Nonsynon	0.83	Goldman Gene	.	.	3.34	0	0	0	0	0	0	0	0	0	0	0	0	0	0	0	0	0	0	0	0	0	0	0	0	0	0	0	0	0	0	0	0	0	0	0
34002432	3	124645777	.	.	.	.	ADCY5	adenylate cyclase 5	Intron	0.83	Special	1	7	3.34	0	0	0	0	0	0	0	0	0	0	0	0	0	0	0	0	0	0	0	0	0	0	0	0	0	0	0	0	0	0	0	0	0	0	0
34067965	3	7469298	.	.	.	.	GRM7	glutamate receptor, metabotropic 7	Synon	0.83	The Glutamatergic System	0	3	3.34	0	0	0	0	0	0	0	0	0	0	0	0	0	0	0	0	0	0	0	0	0	0	0	0	0	0	0	0	0	0	0	0	0	0	0
34144261	1	204391884	.	.	.	.	AVPR1B	arginine vasopressin receptor 1B	Nonsynon	0.83	Goldman Gene	.	.	3.34	0	0	0	0	0	0	0	0	0	0	0	0	0	0	0	0	0	0	0	0	0	0	0	0	0	0	0	0	0	0	0	0	0	0	0
34148312	10	35540593	.	.	.	.	CREM	cAMP responsive element modulator	Nonsynon	0.83	Special	.	.	3.34	0	0	0	0	0	0	0	0	0	0	0	0	0	0	0	0	0	0	0	0	0	0	0	0	0	0	0	0	0	0	0	0	0	0	0
34321402	17	53317699	.	.	.	.	CUEDC1	CUE domain containing 1	Nonsynon	0.83		1	6	3.34	0	0	0	0	0	0	0	0	0	0	0	0	0	0	0	0	0	0	0	0	0	0	0	0	0	0	0	0	0	0	0	0	0	0	0
34533754	17	37302846	.	.	.	.	ACLY	ATP citrate lyase	Nonsynon	0.83		1	7	3.34	0	0	0	0	0	0	0	0	0	0	0	0	0	0	0	0	0	0	0	0	0	0	0	0	0	0	0	0	0	0	0	0	0	0	0
34542615	1	115630263	.	.	.	.	NGFB	nerve growth factor, beta polypeptide	Nonsynon	0.83	Goldman Gene	.	.	3.34	0	0	0	0	0	0	0	0	0	0	0	0	0	0	0	0	0	0	0	0	0	0	0	0	0	0	0	0	0	0	0	0	0	0	0
34561918	8	67910615	.	.	.	.	SGK3	serum/glucocorticoid regulated kinase family, member 3	Nonsynon	0.83		1	7	3.34	0	0	0	0	0	0	0	0	0	0	0	0	0	0	0	0	0	0	0	0	0	0	0	0	0	0	0	0	0	0	0	0	0	0	0
34571486	17	53928206	.	.	.	.	MTMR4	myotubularin related protein 4	Nonsynon	0.83		1	9	3.34	0	0	0	0	0	0	0	0	0	0	0	0	0	0	0	0	0	0	0	0	0	0	0	0	0	0	0	0	0	0	0	0	0	0	0
34658961	23	48941200	.	.	.	.	SYP	synaptophysin	Nonsynon	0.83	Special	.	.	3.34	0	0	0	0	0	0	0	0	0	0	0	0	0	0	0	0	0	0	0	0	0	0	0	0	0	0	0	0	0	0	0	0	0	0	0
34747313	2	218708646	.	.	.	.	IL8RB	interleukin 8 receptor, beta	Nonsynon	0.83		1	6	3.34	0	0	0	0	0	0	0	0	0	0	0	0	0	0	0	0	0	0	0	0	0	0	0	0	0	0	0	0	0	0	0	0	0	0	0
34778614	1	163056028	.	.	.	.	PBX1	pre-B-cell leukemia homeobox 1	Nonsynon	0.83		1	10	3.34	0	0	0	0	0	0	0	0	0	0	0	0	0	0	0	0	0	0	0	0	0	0	0	0	0	0	0	0	0	0	0	0	0	0	0
34886265	15	71315753	.	.	.	.	NEO1	neogenin homolog 1 (chicken)	Nonsynon	0.83		1	6	3.34	0	0	0	0	0	0	0	0	0	0	0	0	0	0	0	0	0	0	0	0	0	0	0	0	0	0	0	0	0	0	0	0	0	0	0
34937624	17	76060163	.	.	.	.	NPTX1	neuronal pentraxin I	Synon	0.83	Special	0	3	3.34	0	0	0	0	0	0	0	0	0	0	0	0	0	0	0	0	0	0	0	0	0	0	0	0	0	0	0	0	0	0	0	0	0	0	0
34988264	19	14069265	.	.	.	.	PRKACA	protein kinase, cAMP-dependent, catalytic, alpha	Nonsynon	0.83	Special	.	.	3.34	0	0	0	0	0	0	0	0	0	0	0	0	0	0	0	0	0	0	0	0	0	0	0	0	0	0	0	0	0	0	0	0	0	0	0
34995665	3	124626434	.	.	.	.	ADCY5	adenylate cyclase 5	Intron	0.83	Special	1	7	3.34	0	0	0	0	0	0	0	0	0	0	0	0	0	0	0	0	0	0	0	0	0	0	0	0	0	0	0	0	0	0	0	0	0	0	0
35013548	6	90035546	.	.	.	.	GABRR2	gamma-aminobutyric acid (GABA) receptor, rho 2	Nonsynon	0.83	The GABA System	.	.	3.34	0	0	0	0	0	0	0	0	0	0	0	0	0	0	0	0	0	0	0	0	0	0	0	0	0	0	0	0	0	0	0	0	0	0	0
35028636	3	14145982	.	.	.	.	TMEM43	transmembrane protein 43	Nonsynon	0.83		1	8	3.34	0	0	0	0	0	0	0	0	0	0	0	0	0	0	0	0	0	0	0	0	0	0	0	0	0	0	0	0	0	0	0	0	0	0	0
35179908	15	39925182	.	.	.	.	PLA2G4B	phospholipase A2, group IVB (cytosolic)	Nonsynon	0.83	Special	.	.	3.34	0	0	0	0	0	0	0	0	0	0	0	0	0	0	0	0	0	0	0	0	0	0	0	0	0	0	0	0	0	0	0	0	0	0	0
35192881	21	31998100	.	.	.	.	SFRS15	splicing factor, arginine/serine-rich 15	Nonsynon	0.83		1	7	3.34	0	0	0	0	0	0	0	0	0	0	0	0	0	0	0	0	0	0	0	0	0	0	0	0	0	0	0	0	0	0	0	0	0	0	0
35310524	3	38573060	.	.	.	.	SCN5A	sodium channel, voltage-gated, type V, alpha subunit	Nonsynon	0.83	Special	.	.	3.34	0	0	0	0	0	0	0	0	0	0	0	0	0	0	0	0	0	0	0	0	0	0	0	0	0	0	0	0	0	0	0	0	0	0	0
35369693	1	204391258	.	.	.	.	AVPR1B	arginine vasopressin receptor 1B	Nonsynon	0.83	Goldman Gene	.	.	3.34	0	0	0	0	0	0	0	0	0	0	0	0	0	0	0	0	0	0	0	0	0	0	0	0	0	0	0	0	0	0	0	0	0	0	0
35476822	3	14462362	.	.	.	.	SLC6A6	solute carrier family 6 (neurotransmitter transporter, taurine), member 6	Synon	0.83	Neurotransmitter Transporters	0	3	3.34	0	0	0	0	0	0	0	0	0	0	0	0	0	0	0	0	0	0	0	0	0	0	0	0	0	0	0	0	0	0	0	0	0	0	0
35586870	18	48532607	.	.	.	.	DCC	deleted in colorectal carcinoma	Nonsynon	0.83		1	8	3.34	0	0	0	0	0	0	0	0	0	0	0	0	0	0	0	0	0	0	0	0	0	0	0	0	0	0	0	0	0	0	0	0	0	0	0
35592906	8	42731041	.	.	.	.	CHRNA6	cholinergic receptor, nicotinic, alpha 6	Nonsynon	0.83	The Nicotine System	.	.	3.34	0	0	0	0	0	0	0	0	0	0	0	0	0	0	0	0	0	0	0	0	0	0	0	0	0	0	0	0	0	0	0	0	0	0	0
35749351	1	40308021	.	.	.	.	CAP1	CAP, adenylate cyclase-associated protein 1 (yeast)	Nonsynon	0.83	Special	.	.	3.34	0	0	0	0	0	0	0	0	0	0	0	0	0	0	0	0	0	0	0	0	0	0	0	0	0	0	0	0	0	0	0	0	0	0	0
35812517	8	42730558	.	.	.	.	CHRNA6	cholinergic receptor, nicotinic, alpha 6	Nonsynon	0.83	The Nicotine System	.	.	3.34	0	0	0	0	0	0	0	0	0	0	0	0	0	0	0	0	0	0	0	0	0	0	0	0	0	0	0	0	0	0	0	0	0	0	0
35915664	7	107357198	.	.	.	.	LAMB1	laminin, beta 1	Nonsynon	0.83		1	15	3.34	0	0	0	0	0	0	0	0	0	0	0	0	0	0	0	0	0	0	0	0	0	0	0	0	0	0	0	0	0	0	0	0	0	0	0
35938166	21	31966353	.	.	.	.	SFRS15	splicing factor, arginine/serine-rich 15	Nonsynon	0.83		1	7	3.34	0	0	0	0	0	0	0	0	0	0	0	0	0	0	0	0	0	0	0	0	0	0	0	0	0	0	0	0	0	0	0	0	0	0	0
36006953	3	14462269	.	.	.	.	SLC6A6	solute carrier family 6 (neurotransmitter transporter, taurine), member 6	Synon	0.83	Neurotransmitter Transporters	0	3	3.34	0	0	0	0	0	0	0	0	0	0	0	0	0	0	0	0	0	0	0	0	0	0	0	0	0	0	0	0	0	0	0	0	0	0	0
36030374	1	204391862	.	.	.	.	AVPR1B	arginine vasopressin receptor 1B	Nonsynon	0.83	Goldman Gene	.	.	3.34	0	0	0	0	0	0	0	0	0	0	0	0	0	0	0	0	0	0	0	0	0	0	0	0	0	0	0	0	0	0	0	0	0	0	0
36044268	7	136351287	.	.	.	.	CHRM2	cholinergic receptor, muscarinic 2	Nonsynon	0.83	The Cholinergic System	.	.	3.34	0	0	0	0	0	0	0	0	0	0	0	0	0	0	0	0	0	0	0	0	0	0	0	0	0	0	0	0	0	0	0	0	0	0	0
36094489	2	218708703	.	.	.	.	IL8RB	interleukin 8 receptor, beta	Nonsynon	0.83		1	6	3.34	0	0	0	0	0	0	0	0	0	0	0	0	0	0	0	0	0	0	0	0	0	0	0	0	0	0	0	0	0	0	0	0	0	0	0
36103499	17	32637849	.	.	.	.	ACACA	acetyl-Coenzyme A carboxylase alpha	Nonsynon	0.83		1	6	3.34	0	0	0	0	0	0	0	0	0	0	0	0	0	0	0	0	0	0	0	0	0	0	0	0	0	0	0	0	0	0	0	0	0	0	0
36126315	15	39925864	.	.	.	.	PLA2G4B	phospholipase A2, group IVB (cytosolic)	Nonsynon	0.83	Special	.	.	3.34	0	0	0	0	0	0	0	0	0	0	0	0	0	0	0	0	0	0	0	0	0	0	0	0	0	0	0	0	0	0	0	0	0	0	0
41261344	3	38591880	.	.	.	.	SCN5A	sodium channel, voltage-gated, type V, alpha subunit	Nonsynon	0.83	Special	.	.	3.34	0	0	0	0	0	0	0	0	0	0	0	0	0	0	0	0	0	0	0	0	0	0	0	0	0	0	0	0	0	0	0	0	0	0	0
41265264	8	42730723	.	.	.	.	CHRNA6	cholinergic receptor, nicotinic, alpha 6	Nonsynon	0.83	The Nicotine System	.	.	3.34	0	0	0	0	0	0	0	0	0	0	0	0	0	0	0	0	0	0	0	0	0	0	0	0	0	0	0	0	0	0	0	0	0	0	0
41268111	1	23393011	.	.	.	.	HTR1D	5-hydroxytryptamine (serotonin) receptor 1D	Nonsynon	0.83	The Serotonergic System	.	.	3.34	0	0	0	0	0	0	0	0	0	0	0	0	0	0	0	0	0	0	0	0	0	0	0	0	0	0	0	0	0	0	0	0	0	0	0
41274977	9	103119538	.	.	.	.	PRG-3	-	Nonsynon	0.83		1	6	3.34	0	0	0	0	0	0	0	0	0	0	0	0	0	0	0	0	0	0	0	0	0	0	0	0	0	0	0	0	0	0	0	0	0	0	0
41276525	3	38630294	.	.	.	.	SCN5A	sodium channel, voltage-gated, type V, alpha subunit	Nonsynon	0.83	Special	.	.	3.34	0	0	0	0	0	0	0	0	0	0	0	0	0	0	0	0	0	0	0	0	0	0	0	0	0	0	0	0	0	0	0	0	0	0	0
41302231	1	204391776	.	.	.	.	AVPR1B	arginine vasopressin receptor 1B	Nonsynon	0.83	Goldman Gene	.	.	3.34	0	0	0	0	0	0	0	0	0	0	0	0	0	0	0	0	0	0	0	0	0	0	0	0	0	0	0	0	0	0	0	0	0	0	0
41302233	1	204391788	.	.	.	.	AVPR1B	arginine vasopressin receptor 1B	Nonsynon	0.83	Goldman Gene	.	.	3.34	0	0	0	0	0	0	0	0	0	0	0	0	0	0	0	0	0	0	0	0	0	0	0	0	0	0	0	0	0	0	0	0	0	0	0
41308421	1	204391791	.	.	.	.	AVPR1B	arginine vasopressin receptor 1B	Nonsynon	0.83	Goldman Gene	.	.	3.34	0	0	0	0	0	0	0	0	0	0	0	0	0	0	0	0	0	0	0	0	0	0	0	0	0	0	0	0	0	0	0	0	0	0	0
41310765	3	38591919	.	.	.	.	SCN5A	sodium channel, voltage-gated, type V, alpha subunit	Nonsynon	0.83	Special	.	.	3.34	0	0	0	0	0	0	0	0	0	0	0	0	0	0	0	0	0	0	0	0	0	0	0	0	0	0	0	0	0	0	0	0	0	0	0
41314448	1	204391458	.	.	.	.	AVPR1B	arginine vasopressin receptor 1B	Nonsynon	0.83	Goldman Gene	.	.	3.34	0	0	0	0	0	0	0	0	0	0	0	0	0	0	0	0	0	0	0	0	0	0	0	0	0	0	0	0	0	0	0	0	0	0	0
41317330	15	24771247	.	.	.	.	GABRA5	gamma-aminobutyric acid (GABA) A receptor, alpha 5	Nonsynon	0.83	The GABA System	.	.	3.34	0	0	0	0	0	0	0	0	0	0	0	0	0	0	0	0	0	0	0	0	0	0	0	0	0	0	0	0	0	0	0	0	0	0	0
41468447	21	40306860	.	.	.	.	DSCAM	Down syndrome cell adhesion molecule	Nonsynon	0.83	Special	.	.	3.34	0	0	0	0	0	0	0	0	0	0	0	0	0	0	0	0	0	0	0	0	0	0	0	0	0	0	0	0	0	0	0	0	0	0	0
45471994	3	38630247	.	.	.	.	SCN5A	sodium channel, voltage-gated, type V, alpha subunit	Nonsynon	0.83	Special	.	.	3.34	0	0	0	0	0	0	0	0	0	0	0	0	0	0	0	0	0	0	0	0	0	0	0	0	0	0	0	0	0	0	0	0	0	0	0
45514691	3	38570840	.	.	.	.	SCN5A	sodium channel, voltage-gated, type V, alpha subunit	Nonsynon	0.83	Special	.	.	3.34	0	0	0	0	0	0	0	0	0	0	0	0	0	0	0	0	0	0	0	0	0	0	0	0	0	0	0	0	0	0	0	0	0	0	0
45546039	3	38630276	.	.	.	.	SCN5A	sodium channel, voltage-gated, type V, alpha subunit	Nonsynon	0.83	Special	.	.	3.34	0	0	0	0	0	0	0	0	0	0	0	0	0	0	0	0	0	0	0	0	0	0	0	0	0	0	0	0	0	0	0	0	0	0	0
45602042	6	52872767	.	.	.	.	GSTA3	glutathione S-transferase A3	Nonsynon	0.83	Special	.	.	3.34	0	0	0	0	0	0	0	0	0	0	0	0	0	0	0	0	0	0	0	0	0	0	0	0	0	0	0	0	0	0	0	0	0	0	0
45620037	3	38630282	.	.	.	.	SCN5A	sodium channel, voltage-gated, type V, alpha subunit	Nonsynon	0.83	Special	.	.	3.34	0	0	0	0	0	0	0	0	0	0	0	0	0	0	0	0	0	0	0	0	0	0	0	0	0	0	0	0	0	0	0	0	0	0	0
28407999	16	3869942	.	.	.	.	CREBBP	CREB binding protein (Rubinstein-Taybi syndrome)	mRNA-UTR	0.92	Special	0	4	3.34	0	0	0	0	0	0	0	0	0	0	0	0	0	0	0	0	0	0	0	0	0	0	0	0	0	0	0	0	0	0	0	0	0	0	0
4994	8	37942955	.	.	.	.	ADRB3	adrenergic, beta-3-, receptor	Nonsynon	0.82	The Adrenergic System	.	.	3.34	0	0	0	0	0	0	0	0	0	0	0	0	0	0	0	0	0	0	0	0	0	0	0	0	0	0	0	0	0	0	0	0	0	0	0
4995	8	37942351	.	.	.	.	ADRB3	adrenergic, beta-3-, receptor	Nonsynon	0.82	The Adrenergic System	.	.	3.34	0	0	0	0	0	0	0	0	0	0	0	0	0	0	0	0	0	0	0	0	0	0	0	0	0	0	0	0	0	0	0	0	0	0	0
6577	6	52723374	0.067	0.202	0.267	0.225	GSTA2	glutathione S-transferase A2	Nonsynon	0.82	Special	.	.	3.34	0	0	0	0	0	0	0	0	0	1	1	1	0	1	1	1	0	0	0	0	0	1	1	1	0	1	1	1	1	1	1	1	0	1	1
[truncated: 3,001 more rows]
[truncated: 2 more columns]

## Sheet: Column Descriptions
Column	Description
rs ID	dbSNP ID (linked to dbSNP)
Chr	Chromosome
Pos (bp)	Genomic Position (base pairs)
HM CEU MAF	HapMap CEU (European American) minor allele frequency
HM CHB MAF	HapMap CHB (Chinese) minor allele frequency
HM JPT MAF	HapMap JPT (Japanese) minor allele frequency
HM YRI MAF	HapMap YRI (African) minor allele frequency
Gene Symbol	NCBI gene symbol (linked to NCBI)
Gene Name	NCBI gene name
Function	dbSNP SNP/gene function
Human/Mouse %	Human/Mouse evolutionary conservation
Category	Category from biologically gene for addiction.
Mouse QTL Top Gene	Gene is in the top 5% for number of phentypic associations in the mouse genetic systems analysis
Mouse QTL Count	Number of phenotypes detected for the gene (a mouse homolog) in the mouse genetic systems analysis
Prioritization Score	Prioritization score from the genomic information network (GIN)
NeuroSNP Submitted	The SNP was nominated through the NIDA notice http://grants.nih.gov/grants/guide/notice-files/NOT-DA-07-010.html
SNP is on Goldman Chip	The SNP is on the Goldman chip, see Hodgkinson, C.A., et al. (2008) Addictions Biology: Haplotype-Based Analysis for 130 Candidate Genes on a Single Array, Alcohol Alcohol.
Microarray (Affy 5.0, etc)	The SNP is on the specified SNP microarray: 1=Yes, 0=No
Tag-8/Array/CEU, etc	The SNP is tagged with r2 ≥ 0.8 by the specified chip in the specified HapMap population. 1=Yes, 0=No.
